# Supplementary material for: Advanced Glycation End Products (AGEs) in Diet and Skin in Relation to Stool Microbiota: The Rotterdam Study
Source: Nutrients. 2023 May 30;15(11):2567. doi: 10.3390/nu15112567 (PMC10255453; doi:10.3390/nu15112567)
Supplement: Supplementary file 1 [file nutrients-15-02567-s001.zip › Supplementary tables_AGEs and microbiome_20230331.xlsx]

## Sheet: suppl table 3
Factor	Taxon	Beta	CI95_L	CI95_U	Se	p	N	presence	median.count	IQR.L	IQR.U	Kingdom	Phylum	Class	Order	Family	Genus
ZCML_adjusted	ASV32	0.308899	0.120832	0.496966	0.0958426	0.00130813	1052	80.7034	77	13	345.25	Bacteria	Firmicutes	Bacilli	Lactobacillales	Streptococcaceae	Streptococcus
ZCEL_adjusted	ASV387	0.148349	0.0539659	0.242733	0.0480996	0.00209486	1052	5.13308	0	0	0	Bacteria	Proteobacteria	Gammaproteobacteria	Enterobacterales	Enterobacteriaceae	Klebsiella
ZCML_adjusted	ASV204	-0.220747	-0.367248	-0.0742461	0.0746596	0.00317973	1052	75.1901	27	3.75	63	Bacteria	Firmicutes	Clostridia	Oscillospirales	Oscillospiraceae	Colidextribacter
ZMGH1_adjusted	ASV448	-0.168639	-0.28081	-0.0564675	0.0571645	0.00324845	1052	16.1597	0	0	0	Bacteria	Firmicutes	Bacilli	Lactobacillales	Streptococcaceae	Lactococcus
ZCML_adjusted	ASV540	-0.259254	-0.432949	-0.0855588	0.0885182	0.00347689	1052	43.8213	0	0	38	Bacteria	Bacteroidota	Bacteroidia	Bacteroidales	Barnesiellaceae	Barnesiella
ZCEL_adjusted	ASV10	0.151331	0.0499136	0.252749	0.0516843	0.00348608	1052	96.5779	424.5	214.75	800.5	Bacteria	Firmicutes	Clostridia	Lachnospirales	Lachnospiraceae	Dorea
ZMGH1_adjusted	ASV387	0.140796	0.045997	0.235595	0.0483113	0.00364083	1052	5.13308	0	0	0	Bacteria	Proteobacteria	Gammaproteobacteria	Enterobacterales	Enterobacteriaceae	Klebsiella
ZCEL_adjusted	ASV96	-0.249858	-0.428481	-0.0712354	0.0910294	0.00615915	1052	30.4183	0	0	33	Bacteria	Firmicutes	Clostridia	Peptostreptococcales-Tissierellales	Peptostreptococcaceae	Terrisporobacter
ZCML_adjusted	ASV446	-0.181104	-0.312161	-0.0500475	0.0667889	0.00680674	1052	20.1521	0	0	0	Bacteria	Actinobacteriota	Coriobacteriia	Coriobacteriales	Eggerthellaceae	Enterorhabdus
ZMGH1_adjusted	ASV44	0.276938	0.0612103	0.492665	0.109939	0.0119175	1052	33.4601	0	0	87.5	Bacteria	Firmicutes	Negativicutes	Veillonellales-Selenomonadales	Veillonellaceae	Dialister
ZMGH1_adjusted	ASV540	-0.222925	-0.396803	-0.0490472	0.0886115	0.0120276	1052	43.8213	0	0	38	Bacteria	Bacteroidota	Bacteroidia	Bacteroidales	Barnesiellaceae	Barnesiella
ZCML_adjusted	ASV2061	-0.0927587	-0.165221	-0.0202966	0.036928	0.0121599	1052	9.22053	0	0	0	Bacteria	Firmicutes	Clostridia	Oscillospirales	Ruminococcaceae	Caproiciproducens
ZCEL_adjusted	ASV123	-0.185304	-0.33236	-0.0382474	0.0749426	0.0135725	1052	84.1255	72.5	14.75	199.25	Bacteria	Firmicutes	Clostridia	Oscillospirales	Oscillospiraceae	UCG-005
ZCEL_adjusted	ASV430	-0.167084	-0.29984	-0.0343292	0.0676545	0.0136837	1052	34.7909	0	0	14	Bacteria	Firmicutes	Clostridia	Lachnospirales	Lachnospiraceae	GCA-900066575
ZCEL_adjusted	ASV17	0.128962	0.0218471	0.236076	0.0545876	0.0183371	1052	96.0076	511.5	238.75	1024	Bacteria	Firmicutes	Clostridia	Lachnospirales	Lachnospiraceae	Coprococcus
ZCEL_adjusted	ASV2965	0.0494547	0.00735672	0.0915526	0.0214539	0.0213541	1052	2.09125	0	0	0	Bacteria	Firmicutes	Clostridia	Peptostreptococcales-Tissierellales	Family XI	Fenollaria
ZCEL_adjusted	ASV204	-0.171383	-0.317551	-0.0252156	0.0744897	0.0216025	1052	75.1901	27	3.75	63	Bacteria	Firmicutes	Clostridia	Oscillospirales	Oscillospiraceae	Colidextribacter
ZCEL_adjusted	ASV1	0.078572	0.0113951	0.145749	0.0342346	0.0219258	1052	99.5247	2396.5	1302.75	4277.75	Bacteria	Firmicutes	Clostridia	Lachnospirales	Lachnospiraceae	Blautia
ZMGH1_adjusted	ASV542	-0.152153	-0.282478	-0.021828	0.066416	0.0221685	1052	15.019	0	0	0	Bacteria	Firmicutes	Clostridia	Lachnospirales	Lachnospiraceae	Sellimonas
ZCEL_adjusted	ASV540	-0.20066	-0.373957	-0.0273633	0.0883154	0.0232851	1052	43.8213	0	0	38	Bacteria	Bacteroidota	Bacteroidia	Bacteroidales	Barnesiellaceae	Barnesiella
ZCEL_adjusted	ASV448	-0.128456	-0.240384	-0.0165274	0.0570407	0.0245307	1052	16.1597	0	0	0	Bacteria	Firmicutes	Bacilli	Lactobacillales	Streptococcaceae	Lactococcus
ZCEL_adjusted	ASV104	0.225875	0.0233521	0.428398	0.10321	0.0288546	1052	38.8783	0	0	83.25	Bacteria	Firmicutes	Bacilli	Erysipelotrichales	Erysipelotrichaceae	Holdemanella
ZCEL_adjusted	ASV2250	0.0578451	0.00595683	0.109733	0.0264432	0.028927	1052	4.08745	0	0	0	Bacteria	Firmicutes	Bacilli	Lactobacillales	Carnobacteriaceae	Granulicatella
ZCEL_adjusted	ASV898	0.0891778	0.00734642	0.171009	0.0417028	0.0327161	1052	6.93916	0	0	0	Bacteria	Firmicutes	Bacilli	Erysipelotrichales	Erysipelotrichaceae	Catenisphaera
ZCML_adjusted	ASV17	0.117182	0.00959403	0.224771	0.0548291	0.0328122	1052	96.0076	511.5	238.75	1024	Bacteria	Firmicutes	Clostridia	Lachnospirales	Lachnospiraceae	Coprococcus
ZMGH1_adjusted	ASV430	-0.144642	-0.278017	-0.0112673	0.0679704	0.0335706	1052	34.7909	0	0	14	Bacteria	Firmicutes	Clostridia	Lachnospirales	Lachnospiraceae	GCA-900066575
ZCML_adjusted	ASV701	-0.100025	-0.193091	-0.00695871	0.0474282	0.035186	1052	7.31939	0	0	0	Bacteria	Firmicutes	Clostridia	Lachnospirales	Lachnospiraceae	Frisingicoccus
ZMGH1_adjusted	ASV1481	0.0787894	0.00531085	0.152268	0.037446	0.0356116	1052	9.69582	0	0	0	Archaea	Euryarchaeota	Methanobacteria	Methanobacteriales	Methanobacteriaceae	Methanobrevibacter
ZMGH1_adjusted	ASV193	0.175206	0.0114419	0.338971	0.0834573	0.036027	1052	50.3802	5	0	38	Bacteria	Firmicutes	Clostridia	Oscillospirales	Oscillospiraceae	UCG-003
ZCEL_adjusted	ASV597	-0.0865629	-0.167788	-0.00533734	0.041394	0.0367535	1052	5.79848	0	0	0	Bacteria	Firmicutes	Clostridia	Lachnospirales	Lachnospiraceae	Lachnospiraceae UCG-003
ZMGH1_adjusted	ASV196	0.132222	0.00753654	0.256907	0.0635418	0.0376915	1052	9.88593	0	0	0	Bacteria	Firmicutes	Bacilli	Lactobacillales	Lactobacillaceae	Ligilactobacillus
ZCML_adjusted	ASV378	-0.151337	-0.295324	-0.00735101	0.0733782	0.039415	1052	41.0646	0	0	13	Bacteria	Firmicutes	Clostridia	Oscillospirales	Ruminococcaceae	DTU089
ZCEL_adjusted	ASV35	-0.154265	-0.301691	-0.00683956	0.0751308	0.0402949	1052	90.3992	261.5	51.75	737.5	Bacteria	Firmicutes	Clostridia	Christensenellales	Christensenellaceae	Christensenellaceae R-7 group
ZCEL_adjusted	ASV403	0.0904447	0.0039107	0.176979	0.0440993	0.0405243	1052	6.17871	0	0	0	Bacteria	Firmicutes	Bacilli	Lactobacillales	Lactobacillaceae	Limosilactobacillus
ZCEL_adjusted	ASV1062	-0.127829	-0.250422	-0.00523616	0.0624755	0.0410017	1052	39.924	0	0	8	Bacteria	Firmicutes	Clostridia	Lachnospirales	Defluviitaleaceae	Defluviitaleaceae UCG-011
ZMGH1_adjusted	ASV7	0.129466	0.00443775	0.254493	0.0637165	0.042418	1052	94.3916	435	192.75	841.25	Bacteria	Firmicutes	Clostridia	Lachnospirales	Lachnospiraceae	Fusicatenibacter
ZMGH1_adjusted	ASV10	0.104931	0.00289687	0.206965	0.0519985	0.043852	1052	96.5779	424.5	214.75	800.5	Bacteria	Firmicutes	Clostridia	Lachnospirales	Lachnospiraceae	Dorea
ZCEL_adjusted	ASV1024	0.0952654	-0.000430683	0.190961	0.0487685	0.0510381	1052	18.0608	0	0	0	Bacteria	Patescibacteria	Saccharimonadia	Saccharimonadales	Saccharimonadaceae	TM7x
ZCML_adjusted	ASV918	0.0738771	-0.000456592	0.148211	0.0378818	0.0514213	1052	6.36882	0	0	0	Bacteria	Firmicutes	Bacilli	Lactobacillales	Lactobacillaceae	Lacticaseibacillus
ZCML_adjusted	ASV2965	0.0419692	-0.000325345	0.0842637	0.0215541	0.0517852	1052	2.09125	0	0	0	Bacteria	Firmicutes	Clostridia	Peptostreptococcales-Tissierellales	Family XI	Fenollaria
ZCEL_adjusted	ASV936	-0.137997	-0.277299	0.0013046	0.0709907	0.0521805	1052	47.8137	0	0	14	Bacteria	Firmicutes	Clostridia	Oscillospirales	Ruminococcaceae	Paludicola
ZCEL_adjusted	ASV2160	0.0583733	-0.00119223	0.117939	0.0303557	0.0547563	1052	6.65399	0	0	0	Bacteria	Firmicutes	Clostridia	Oscillospirales	Ruminococcaceae	Phocea
ZMGH1_adjusted	ASV1062	-0.120306	-0.243408	0.00279645	0.0627353	0.0554262	1052	39.924	0	0	8	Bacteria	Firmicutes	Clostridia	Lachnospirales	Defluviitaleaceae	Defluviitaleaceae UCG-011
ZCML_adjusted	ASV96	-0.175297	-0.354955	0.00436178	0.0915572	0.0558167	1052	30.4183	0	0	33	Bacteria	Firmicutes	Clostridia	Peptostreptococcales-Tissierellales	Peptostreptococcaceae	Terrisporobacter
ZCML_adjusted	ASV104	0.196926	-0.00650926	0.400362	0.103675	0.0577802	1052	38.8783	0	0	83.25	Bacteria	Firmicutes	Bacilli	Erysipelotrichales	Erysipelotrichaceae	Holdemanella
ZCEL_adjusted	ASV196	0.119954	-0.00428922	0.244197	0.0633166	0.0584351	1052	9.88593	0	0	0	Bacteria	Firmicutes	Bacilli	Lactobacillales	Lactobacillaceae	Ligilactobacillus
ZCEL_adjusted	ASV41	0.179902	-0.00774199	0.367547	0.0956271	0.0602119	1052	75	100.5	4.5	235	Bacteria	Firmicutes	Clostridia	Lachnospirales	Lachnospiraceae	[Ruminococcus] gauvreauii group
ZCML_adjusted	ASV161	-0.101951	-0.208671	0.00476963	0.0543868	0.0611348	1052	6.27376	0	0	0	Bacteria	Bacteroidota	Bacteroidia	Bacteroidales	Muribaculaceae	CAG-873
ZCEL_adjusted	ASV542	-0.124059	-0.253984	0.00586592	0.0662123	0.0612582	1052	15.019	0	0	0	Bacteria	Firmicutes	Clostridia	Lachnospirales	Lachnospiraceae	Sellimonas
ZMGH1_adjusted	ASV701	-0.08778	-0.18089	0.00532974	0.0474505	0.0646077	1052	7.31939	0	0	0	Bacteria	Firmicutes	Clostridia	Lachnospirales	Lachnospiraceae	Frisingicoccus
ZCML_adjusted	ASV2211	0.0715451	-0.00459136	0.147682	0.0388006	0.0654797	1052	7.98479	0	0	0	Bacteria	Firmicutes	Negativicutes	Veillonellales-Selenomonadales	Veillonellaceae	Allisonella
ZMGH1_adjusted	ASV640	0.0596539	-0.0038488	0.123157	0.0323621	0.0655668	1052	2.6616	0	0	0	Bacteria	Firmicutes	Clostridia	Lachnospirales	Lachnospiraceae	Lachnospiraceae UCG-007
ZCML_adjusted	ASV1534	-0.0881332	-0.183546	0.00727982	0.0486242	0.0701922	1052	20.057	0	0	0	Bacteria	Firmicutes	Clostridia	Oscillospirales	Butyricicoccaceae	UCG-009
ZMGH1_adjusted	ASV204	-0.134133	-0.281019	0.0127534	0.074856	0.0734436	1052	75.1901	27	3.75	63	Bacteria	Firmicutes	Clostridia	Oscillospirales	Oscillospiraceae	Colidextribacter
ZMGH1_adjusted	ASV94	-0.128931	-0.270366	0.0125041	0.072078	0.0739431	1052	86.1217	72	20	155.25	Bacteria	Firmicutes	Clostridia	Lachnospirales	Lachnospiraceae	[Eubacterium] ventriosum group
ZMGH1_adjusted	ASV41	0.169782	-0.0186345	0.358198	0.0960203	0.0773239	1052	75	100.5	4.5	235	Bacteria	Firmicutes	Clostridia	Lachnospirales	Lachnospiraceae	[Ruminococcus] gauvreauii group
ZCEL_adjusted	ASV2040	-0.0582372	-0.123249	0.0067749	0.0331314	0.079082	1052	9.31559	0	0	0	Bacteria	Firmicutes	Clostridia	Eubacteriales	Anaerofustaceae	Anaerofustis
ZMGH1_adjusted	ASV2250	0.0464481	-0.00568638	0.0985827	0.0265687	0.0807204	1052	4.08745	0	0	0	Bacteria	Firmicutes	Bacilli	Lactobacillales	Carnobacteriaceae	Granulicatella
ZMGH1_adjusted	ASV403	0.0773876	-0.00953313	0.164308	0.0442964	0.0809262	1052	6.17871	0	0	0	Bacteria	Firmicutes	Bacilli	Lactobacillales	Lactobacillaceae	Limosilactobacillus
ZCML_adjusted	ASV448	-0.0988149	-0.211297	0.0136672	0.057323	0.0850369	1052	16.1597	0	0	0	Bacteria	Firmicutes	Bacilli	Lactobacillales	Streptococcaceae	Lactococcus
ZCML_adjusted	ASV13	-0.0908155	-0.195017	0.0133865	0.0531033	0.0875338	1052	97.4335	466	195.75	931.5	Bacteria	Firmicutes	Clostridia	Lachnospirales	Lachnospiraceae	Anaerostipes
ZMGH1_adjusted	ASV446	-0.113652	-0.244986	0.0176831	0.0669307	0.0897978	1052	20.1521	0	0	0	Bacteria	Actinobacteriota	Coriobacteriia	Coriobacteriales	Eggerthellaceae	Enterorhabdus
ZCEL_adjusted	ASV82	0.204807	-0.0332929	0.442908	0.12134	0.0917355	1052	36.4068	0	0	177	Bacteria	Bacteroidota	Bacteroidia	Bacteroidales	Prevotellaceae	Prevotella_9
ZCML_adjusted	ASV2101	-0.0671706	-0.145338	0.0109968	0.0398356	0.0920584	1052	8.74525	0	0	0	Bacteria	Firmicutes	Clostridia	Lachnospirales	Lachnospiraceae	Catenibacillus
ZMGH1_adjusted	ASV2101	-0.0663308	-0.144499	0.0118376	0.039836	0.0961956	1052	8.74525	0	0	0	Bacteria	Firmicutes	Clostridia	Lachnospirales	Lachnospiraceae	Catenibacillus
ZMGH1_adjusted	ASV123	-0.125422	-0.273291	0.0224467	0.0753566	0.0963384	1052	84.1255	72.5	14.75	199.25	Bacteria	Firmicutes	Clostridia	Oscillospirales	Oscillospiraceae	UCG-005
ZCEL_adjusted	ASV77	-0.078839	-0.172372	0.0146944	0.0476664	0.0984349	1052	95.6274	79.5	36	156.25	Bacteria	Firmicutes	Clostridia	Oscillospirales	Ruminococcaceae	Incertae Sedis
ZMGH1_adjusted	ASV17	0.0906541	-0.0170268	0.198335	0.0548762	0.0988421	1052	96.0076	511.5	238.75	1024	Bacteria	Firmicutes	Clostridia	Lachnospirales	Lachnospiraceae	Coprococcus
ZCML_adjusted	ASV197	-0.135892	-0.297573	0.0257892	0.0823957	0.099397	1052	25.4753	0	0	3	Bacteria	Firmicutes	Clostridia	Lachnospirales	Lachnospiraceae	Tyzzerella
ZCEL_adjusted	ASV7	0.104641	-0.0199843	0.229266	0.0635112	0.0997385	1052	94.3916	435	192.75	841.25	Bacteria	Firmicutes	Clostridia	Lachnospirales	Lachnospiraceae	Fusicatenibacter
ZCML_adjusted	ASV3864	0.0308238	-0.00594637	0.067594	0.0187388	0.100289	1052	1.23574	0	0	0	Bacteria	Actinobacteriota	Actinobacteria	Micrococcales	Micrococcaceae	Rothia
ZMGH1_adjusted	ASV2965	0.0352454	-0.00707092	0.0775617	0.0215652	0.102485	1052	2.09125	0	0	0	Bacteria	Firmicutes	Clostridia	Peptostreptococcales-Tissierellales	Family XI	Fenollaria
ZCEL_adjusted	ASV161	-0.088368	-0.194714	0.0179779	0.0541958	0.103293	1052	6.27376	0	0	0	Bacteria	Bacteroidota	Bacteroidia	Bacteroidales	Muribaculaceae	CAG-873
ZCEL_adjusted	ASV567	-0.116621	-0.257094	0.0238513	0.0715875	0.103601	1052	32.9848	0	0	13	Bacteria	Firmicutes	Clostridia	Lachnospirales	Lachnospiraceae	Shuttleworthia
ZCML_adjusted	ASV383	0.0825048	-0.0173306	0.18234	0.050878	0.105188	1052	10.3612	0	0	0	Bacteria	Firmicutes	Clostridia	Lachnospirales	Lachnospiraceae	Hungatella
ZCML_adjusted	ASV576	0.084346	-0.0184999	0.187192	0.0524122	0.107859	1052	10.1711	0	0	0	Bacteria	Actinobacteriota	Coriobacteriia	Coriobacteriales	Eggerthellaceae	Eggerthella
ZCML_adjusted	ASV921	0.06393	-0.014111	0.141971	0.0397711	0.108261	1052	6.36882	0	0	0	Bacteria	Firmicutes	Clostridia	Lachnospirales	Lachnospiraceae	Oribacterium
ZCML_adjusted	ASV417	0.0904593	-0.0203487	0.201267	0.0564698	0.109481	1052	16.1597	0	0	0	Bacteria	Actinobacteriota	Coriobacteriia	Coriobacteriales	Eggerthellaceae	Slackia
ZCEL_adjusted	ASV97	-0.124963	-0.279311	0.0293846	0.0786585	0.112437	1052	84.6008	103	26	263.25	Bacteria	Firmicutes	Clostridia	Oscillospirales	Oscillospiraceae	NK4A214 group
ZMGH1_adjusted	ASV1	0.0545852	-0.0129436	0.122114	0.0344139	0.113013	1052	99.5247	2396.5	1302.75	4277.75	Bacteria	Firmicutes	Clostridia	Lachnospirales	Lachnospiraceae	Blautia
ZMGH1_adjusted	ASV898	0.0660028	-0.0162314	0.148237	0.041908	0.115574	1052	6.93916	0	0	0	Bacteria	Firmicutes	Bacilli	Erysipelotrichales	Erysipelotrichaceae	Catenisphaera
ZMGH1_adjusted	ASV2040	-0.0523829	-0.117669	0.0129028	0.0332708	0.11569	1052	9.31559	0	0	0	Bacteria	Firmicutes	Clostridia	Eubacteriales	Anaerofustaceae	Anaerofustis
ZCML_adjusted	ASV387	0.0759313	-0.0191445	0.171007	0.0484524	0.117389	1052	5.13308	0	0	0	Bacteria	Proteobacteria	Gammaproteobacteria	Enterobacterales	Enterobacteriaceae	Klebsiella
ZCEL_adjusted	ASV32	0.149504	-0.0385402	0.337549	0.095831	0.119045	1052	80.7034	77	13	345.25	Bacteria	Firmicutes	Bacilli	Lactobacillales	Streptococcaceae	Streptococcus
ZMGH1_adjusted	ASV32	0.149858	-0.0389236	0.338639	0.0962064	0.119617	1052	80.7034	77	13	345.25	Bacteria	Firmicutes	Bacilli	Lactobacillales	Streptococcaceae	Streptococcus
ZMGH1_adjusted	ASV246	0.11203	-0.0301162	0.254176	0.0724403	0.122285	1052	22.7186	0	0	0	Bacteria	Firmicutes	Clostridia	Lachnospirales	Lachnospiraceae	Lachnospiraceae AC2044 group
ZCML_adjusted	ASV151	0.120765	-0.0331791	0.274709	0.0784527	0.124027	1052	64.5437	12	0	30	Bacteria	Firmicutes	Clostridia	Oscillospirales	Ruminococcaceae	UBA1819
ZMGH1_adjusted	ASV2915	0.0424854	-0.0119793	0.0969501	0.0277562	0.126157	1052	3.9924	0	0	0	Bacteria	Actinobacteriota	Actinobacteria	Actinomycetales	Actinomycetaceae	Actinomyces
ZCML_adjusted	ASV286	0.118188	-0.033769	0.270145	0.07744	0.127268	1052	26.9962	0	0	13	Bacteria	Firmicutes	Clostridia	Lachnospirales	Lachnospiraceae	Howardella
ZMGH1_adjusted	ASV1630	-0.0314574	-0.0720254	0.00911068	0.0206742	0.12842	1052	1.14068	0	0	0	Bacteria	Bacteroidota	Bacteroidia	Bacteroidales	Rikenellaceae	Rikenella
ZCEL_adjusted	ASV1204	0.0595623	-0.0183804	0.137505	0.039721	0.134044	1052	5.98859	0	0	0	Bacteria	Firmicutes	Clostridia	Lachnospirales	Lachnospiraceae	FD2005
ZCEL_adjusted	ASV417	0.0842823	-0.0261084	0.194673	0.0562571	0.134395	1052	16.1597	0	0	0	Bacteria	Actinobacteriota	Coriobacteriia	Coriobacteriales	Eggerthellaceae	Slackia
ZCML_adjusted	ASV330	-0.087475	-0.20293	0.0279805	0.0588382	0.137397	1052	10.6464	0	0	0	Bacteria	Bacteroidota	Bacteroidia	Bacteroidales	Prevotellaceae	Prevotella_7
ZCEL_adjusted	ASV1551	0.0681062	-0.0219829	0.158195	0.0459111	0.138262	1052	9.03042	0	0	0	Bacteria	Actinobacteriota	Coriobacteriia	Coriobacteriales	Atopobiaceae	Olsenella
ZMGH1_adjusted	ASV3864	0.0276844	-0.00909417	0.064463	0.0187431	0.139966	1052	1.23574	0	0	0	Bacteria	Actinobacteriota	Actinobacteria	Micrococcales	Micrococcaceae	Rothia
ZCEL_adjusted	ASV42	-0.147688	-0.345625	0.050248	0.100872	0.143465	1052	71.9582	57	0	302	Bacteria	Firmicutes	Clostridia	Clostridiales	Clostridiaceae	Clostridium sensu stricto 1
ZCEL_adjusted	ASV166	0.107766	-0.0371257	0.252658	0.0738395	0.14474	1052	13.308	0	0	0	Bacteria	Firmicutes	Bacilli	Erysipelotrichales	Erysipelatoclostridiaceae	Catenibacterium
ZCEL_adjusted	ASV113	-0.129816	-0.30445	0.0448184	0.0889967	0.144962	1052	63.5932	25	0	90	Bacteria	Firmicutes	Clostridia	Lachnospirales	Lachnospiraceae	[Eubacterium] xylanophilum group
ZCML_adjusted	ASV123	-0.109681	-0.2576	0.0382371	0.075382	0.14597	1052	84.1255	72.5	14.75	199.25	Bacteria	Firmicutes	Clostridia	Oscillospirales	Oscillospiraceae	UCG-005
ZCML_adjusted	ASV403	0.0639394	-0.0230238	0.150903	0.0443181	0.149396	1052	6.17871	0	0	0	Bacteria	Firmicutes	Bacilli	Lactobacillales	Lactobacillaceae	Limosilactobacillus
ZMGH1_adjusted	ASV597	-0.0597813	-0.141415	0.0218525	0.0416021	0.151026	1052	5.79848	0	0	0	Bacteria	Firmicutes	Clostridia	Lachnospirales	Lachnospiraceae	Lachnospiraceae UCG-003
ZMGH1_adjusted	ASV96	-0.131437	-0.31123	0.0483557	0.0916258	0.151731	1052	30.4183	0	0	33	Bacteria	Firmicutes	Clostridia	Peptostreptococcales-Tissierellales	Peptostreptococcaceae	Terrisporobacter
ZMGH1_adjusted	ASV726	0.0771067	-0.0284897	0.182703	0.0538139	0.152204	1052	22.4335	0	0	0	Bacteria	Bacteroidota	Bacteroidia	Bacteroidales	Barnesiellaceae	Coprobacter
ZMGH1_adjusted	ASV273	-0.111681	-0.264698	0.0413354	0.07798	0.152395	1052	65.8745	16	0	40	Bacteria	Firmicutes	Clostridia	Peptostreptococcales-Tissierellales	Anaerovoracaceae	Family XIII UCG-001
ZMGH1_adjusted	ASV489	-0.107748	-0.255432	0.039936	0.0752624	0.152551	1052	37.4525	0	0	12	Bacteria	Firmicutes	Bacilli	Erysipelotrichales	Erysipelatoclostridiaceae	Erysipelatoclostridium
ZCML_adjusted	ASV208	0.106691	-0.0428652	0.256248	0.0762169	0.16186	1052	21.5779	0	0	0	Bacteria	Firmicutes	Bacilli	Lactobacillales	Lactobacillaceae	Lactobacillus
ZCEL_adjusted	ASV197	0.11485	-0.0462559	0.275957	0.0821027	0.162153	1052	25.4753	0	0	3	Bacteria	Firmicutes	Clostridia	Lachnospirales	Lachnospiraceae	Tyzzerella
ZCEL_adjusted	ASV3864	0.0261059	-0.0105334	0.0627451	0.018672	0.162374	1052	1.23574	0	0	0	Bacteria	Actinobacteriota	Actinobacteria	Micrococcales	Micrococcaceae	Rothia
ZMGH1_adjusted	ASV2160	0.0425611	-0.0172878	0.10241	0.0305001	0.163181	1052	6.65399	0	0	0	Bacteria	Firmicutes	Clostridia	Oscillospirales	Ruminococcaceae	Phocea
ZMGH1_adjusted	ASV1396	-0.0690872	-0.166388	0.0282137	0.0495864	0.163836	1052	22.2433	0	0	0	Bacteria	Firmicutes	Bacilli	Erysipelotrichales	Erysipelotrichaceae	Holdemania
ZCML_adjusted	ASV1329	0.0340073	-0.0141	0.0821145	0.0245164	0.165701	1052	1.80608	0	0	0	Bacteria	Firmicutes	Bacilli	Lactobacillales	Lactobacillaceae	Pediococcus
ZMGH1_adjusted	ASV706	-0.0961776	-0.23294	0.0405846	0.0696965	0.1679	1052	29.8479	0	0	11	Bacteria	Firmicutes	Clostridia	Oscillospirales	Oscillospiraceae	Oscillospira
ZCEL_adjusted	ASV1329	0.0334147	-0.0145052	0.0813345	0.0244208	0.171519	1052	1.80608	0	0	0	Bacteria	Firmicutes	Bacilli	Lactobacillales	Lactobacillaceae	Pediococcus
ZCEL_adjusted	ASV930	-0.0562435	-0.136965	0.0244785	0.0411374	0.171855	1052	10.076	0	0	0	Bacteria	Firmicutes	Clostridia	Lachnospirales	Lachnospiraceae	[Eubacterium] fissicatena group
ZCEL_adjusted	ASV489	-0.102156	-0.249278	0.044966	0.074976	0.173331	1052	37.4525	0	0	12	Bacteria	Firmicutes	Bacilli	Erysipelotrichales	Erysipelatoclostridiaceae	Erysipelatoclostridium
ZCEL_adjusted	ASV65	-0.123499	-0.301754	0.0547559	0.090842	0.174286	1052	77.9468	82.5	12	260	Bacteria	Firmicutes	Clostridia	Lachnospirales	Lachnospiraceae	[Eubacterium] eligens group
ZCEL_adjusted	ASV701	-0.0641503	-0.156968	0.0286671	0.0473015	0.17533	1052	7.31939	0	0	0	Bacteria	Firmicutes	Clostridia	Lachnospirales	Lachnospiraceae	Frisingicoccus
ZCEL_adjusted	ASV94	-0.0964089	-0.237388	0.0445697	0.0718453	0.179923	1052	86.1217	72	20	155.25	Bacteria	Firmicutes	Clostridia	Lachnospirales	Lachnospiraceae	[Eubacterium] ventriosum group
ZMGH1_adjusted	ASV284	-0.048503	-0.119601	0.0225944	0.0362326	0.180975	1052	2.37643	0	0	0	Bacteria	Firmicutes	Negativicutes	Veillonellales-Selenomonadales	Selenomonadaceae	Megamonas
ZCML_adjusted	ASV503	-0.0744929	-0.183966	0.0349797	0.0557893	0.182086	1052	10.4563	0	0	0	Bacteria	Firmicutes	Clostridia	Lachnospirales	Lachnospiraceae	Tuzzerella
ZCML_adjusted	ASV97	-0.104836	-0.259848	0.0501765	0.0789971	0.184773	1052	84.6008	103	26	263.25	Bacteria	Firmicutes	Clostridia	Oscillospirales	Oscillospiraceae	NK4A214 group
ZMGH1_adjusted	ASV930	-0.0547624	-0.135805	0.0262797	0.0413006	0.185149	1052	10.076	0	0	0	Bacteria	Firmicutes	Clostridia	Lachnospirales	Lachnospiraceae	[Eubacterium] fissicatena group
ZMGH1_adjusted	ASV1415	-0.0623775	-0.155353	0.0305979	0.047382	0.188303	1052	14.3536	0	0	0	Bacteria	Firmicutes	Bacilli	Erysipelotrichales	Erysipelotrichaceae	Merdibacter
ZCML_adjusted	ASV1024	0.0645033	-0.0316657	0.160672	0.0490095	0.188418	1052	18.0608	0	0	0	Bacteria	Patescibacteria	Saccharimonadia	Saccharimonadales	Saccharimonadaceae	TM7x
ZCEL_adjusted	ASV1396	-0.0645083	-0.161441	0.0324244	0.0493987	0.191886	1052	22.2433	0	0	0	Bacteria	Firmicutes	Bacilli	Erysipelotrichales	Erysipelotrichaceae	Holdemania
ZCEL_adjusted	ASV200	-0.0728282	-0.18229	0.0366336	0.0557838	0.191997	1052	91.1597	45	17	95	Bacteria	Firmicutes	Clostridia	Peptostreptococcales-Tissierellales	Anaerovoracaceae	Family XIII AD3011 group
ZCML_adjusted	ASV196	0.0822403	-0.0426069	0.207088	0.0636245	0.196441	1052	9.88593	0	0	0	Bacteria	Firmicutes	Bacilli	Lactobacillales	Lactobacillaceae	Ligilactobacillus
ZCEL_adjusted	ASV1020	0.0255173	-0.0137104	0.0647449	0.0199911	0.202089	1052	1.04563	0	0	0	Bacteria	Firmicutes	Bacilli	Lactobacillales	Lactobacillaceae	HT002
ZCEL_adjusted	ASV294	0.0833582	-0.0448924	0.211609	0.0653589	0.202456	1052	11.7871	0	0	0	Bacteria	Bacteroidota	Bacteroidia	Bacteroidales	Prevotellaceae	Alloprevotella
ZCEL_adjusted	ASV538	0.0765494	-0.0415964	0.194695	0.0602093	0.203875	1052	27.0913	0	0	4	Bacteria	Desulfobacterota	Desulfovibrionia	Desulfovibrionales	Desulfovibrionaceae	Bilophila
ZCEL_adjusted	ASV665	0.0868839	-0.0474	0.221168	0.0684335	0.204508	1052	22.8137	0	0	0	Bacteria	Actinobacteriota	Coriobacteriia	Coriobacteriales	Eggerthellaceae	Adlercreutzia
ZCML_adjusted	ASV193	0.105889	-0.0580998	0.269877	0.0835716	0.205424	1052	50.3802	5	0	38	Bacteria	Firmicutes	Clostridia	Oscillospirales	Oscillospiraceae	UCG-003
ZCEL_adjusted	ASV1513	0.0429291	-0.0235851	0.109443	0.0338968	0.205632	1052	4.37262	0	0	0	Bacteria	Firmicutes	Bacilli	Erysipelotrichales	Erysipelotrichaceae	Faecalitalea
ZMGH1_adjusted	ASV567	-0.090075	-0.231171	0.051021	0.0719051	0.2106	1052	32.9848	0	0	13	Bacteria	Firmicutes	Clostridia	Lachnospirales	Lachnospiraceae	Shuttleworthia
ZCML_adjusted	ASV597	-0.0520086	-0.133664	0.0296468	0.0416131	0.21165	1052	5.79848	0	0	0	Bacteria	Firmicutes	Clostridia	Lachnospirales	Lachnospiraceae	Lachnospiraceae UCG-003
ZCML_adjusted	ASV341	-0.0274673	-0.0711011	0.0161664	0.0222366	0.217024	1052	0.95057	0	0	0	Bacteria	Bacteroidota	Bacteroidia	Bacteroidales	Rikenellaceae	Rikenellaceae RC9 gut group
ZMGH1_adjusted	ASV294	0.080709	-0.0480506	0.209468	0.0656182	0.218984	1052	11.7871	0	0	0	Bacteria	Bacteroidota	Bacteroidia	Bacteroidales	Prevotellaceae	Alloprevotella
ZMGH1_adjusted	ASV82	0.149214	-0.0899735	0.388401	0.121894	0.221183	1052	36.4068	0	0	177	Bacteria	Bacteroidota	Bacteroidia	Bacteroidales	Prevotellaceae	Prevotella_9
ZCEL_adjusted	ASV39	0.0901396	-0.0552513	0.235531	0.0740939	0.224048	1052	86.5019	118	38.75	242.25	Bacteria	Firmicutes	Clostridia	Lachnospirales	Lachnospiraceae	Lachnospiraceae ND3007 group
ZCML_adjusted	ASV82	0.148149	-0.0910457	0.387345	0.121898	0.224508	1052	36.4068	0	0	177	Bacteria	Bacteroidota	Bacteroidia	Bacteroidales	Prevotellaceae	Prevotella_9
ZMGH1_adjusted	ASV1749	0.0317137	-0.0196701	0.0830974	0.0261861	0.226138	1052	3.23194	0	0	0	Bacteria	Actinobacteriota	Coriobacteriia	Coriobacteriales	Atopobiaceae	Coriobacteriaceae UCG-002
ZCML_adjusted	ASV176	-0.118619	-0.311704	0.0744658	0.0983998	0.228291	1052	39.7338	0	0	56.25	Bacteria	Bacteroidota	Bacteroidia	Bacteroidales	Prevotellaceae	Paraprevotella
ZCEL_adjusted	ASV369	0.096731	-0.060814	0.254276	0.0802879	0.228554	1052	42.2053	0	0	22	Bacteria	Firmicutes	Clostridia	Oscillospirales	Ruminococcaceae	Negativibacillus
ZCEL_adjusted	ASV554	-0.0518502	-0.137023	0.0333231	0.0434059	0.232538	1052	5.03802	0	0	0	Bacteria	Firmicutes	Clostridia	Lachnospirales	Lachnospiraceae	[Bacteroides] pectinophilus group
ZMGH1_adjusted	ASV238	0.101283	-0.0660741	0.26864	0.0852883	0.235287	1052	46.8631	0	0	35.25	Bacteria	Firmicutes	Clostridia	Lachnospirales	Lachnospiraceae	Lachnospiraceae UCG-004
ZMGH1_adjusted	ASV537	0.0746863	-0.0491506	0.198523	0.0631095	0.236906	1052	17.3954	0	0	0	Bacteria	Firmicutes	Negativicutes	Veillonellales-Selenomonadales	Veillonellaceae	Veillonella
ZCEL_adjusted	ASV1929	-0.0381674	-0.101563	0.0252286	0.0323078	0.237727	1052	4.65779	0	0	0	Bacteria	Firmicutes	Clostridia	Lachnospirales	Lachnospiraceae	Lachnospiraceae NK4B4 group
ZCEL_adjusted	ASV284	-0.0425575	-0.113392	0.0282765	0.0360983	0.238695	1052	2.37643	0	0	0	Bacteria	Firmicutes	Negativicutes	Veillonellales-Selenomonadales	Selenomonadaceae	Megamonas
ZMGH1_adjusted	ASV1020	0.0235306	-0.0158554	0.0629166	0.0200718	0.241337	1052	1.04563	0	0	0	Bacteria	Firmicutes	Bacilli	Lactobacillales	Lactobacillaceae	HT002
ZMGH1_adjusted	ASV665	0.0801603	-0.0546653	0.214986	0.0687096	0.243618	1052	22.8137	0	0	0	Bacteria	Actinobacteriota	Coriobacteriia	Coriobacteriales	Eggerthellaceae	Adlercreutzia
ZCML_adjusted	ASV33	-0.126866	-0.340976	0.0872442	0.109114	0.245224	1052	49.9049	0	0	145.25	Bacteria	Firmicutes	Clostridia	Peptostreptococcales-Tissierellales	Peptostreptococcaceae	Intestinibacter
ZMGH1_adjusted	ASV77	-0.0555726	-0.149535	0.0383896	0.0478848	0.246093	1052	95.6274	79.5	36	156.25	Bacteria	Firmicutes	Clostridia	Oscillospirales	Ruminococcaceae	Incertae Sedis
ZCEL_adjusted	ASV2	0.0715884	-0.0497895	0.192966	0.0618564	0.247403	1052	95.8175	859.5	385	1711.75	Bacteria	Firmicutes	Clostridia	Lachnospirales	Lachnospiraceae	Agathobacter
ZCEL_adjusted	ASV1630	-0.0237582	-0.0641873	0.0166709	0.0206034	0.249127	1052	1.14068	0	0	0	Bacteria	Bacteroidota	Bacteroidia	Bacteroidales	Rikenellaceae	Rikenella
ZMGH1_adjusted	ASV1329	0.0281369	-0.0199833	0.0762572	0.024523	0.251493	1052	1.80608	0	0	0	Bacteria	Firmicutes	Bacilli	Lactobacillales	Lactobacillaceae	Pediococcus
ZCEL_adjusted	ASV383	0.0577898	-0.0417179	0.157297	0.050711	0.254719	1052	10.3612	0	0	0	Bacteria	Firmicutes	Clostridia	Lachnospirales	Lachnospiraceae	Hungatella
ZMGH1_adjusted	ASV4620	0.0213523	-0.0154791	0.0581837	0.01877	0.25556	1052	1.61597	0	0	0	Bacteria	Firmicutes	Clostridia	Peptostreptococcales-Tissierellales	Family XI	Finegoldia
ZCEL_adjusted	ASV26	-0.0845259	-0.230447	0.0613951	0.0743641	0.255947	1052	90.5894	335	104.75	814.25	Bacteria	Firmicutes	Clostridia	Oscillospirales	Oscillospiraceae	UCG-002
ZCEL_adjusted	ASV3537	0.0199496	-0.0145146	0.0544138	0.0175636	0.256282	1052	1.3308	0	0	0	Bacteria	Firmicutes	Bacilli	Erysipelotrichales	Erysipelotrichaceae	Dielma
ZCML_adjusted	ASV58	-0.106825	-0.291646	0.0779969	0.0941886	0.25699	1052	71.8631	48.5	0	168	Bacteria	Firmicutes	Bacilli	Erysipelotrichales	Erysipelatoclostridiaceae	Erysipelotrichaceae UCG-003
ZCEL_adjusted	ASV89	0.10877	-0.0801277	0.297668	0.096266	0.258782	1052	54.8479	21	0	98.25	Bacteria	Firmicutes	Clostridia	Lachnospirales	Lachnospiraceae	CAG-56
ZCEL_adjusted	ASV1015	0.0480765	-0.0355306	0.131684	0.0426077	0.259432	1052	9.79087	0	0	0	Bacteria	Firmicutes	Clostridia	Peptostreptococcales-Tissierellales	Anaerovoracaceae	Mogibacterium
ZCML_adjusted	ASV930	-0.0465424	-0.127605	0.0345207	0.0413112	0.260161	1052	10.076	0	0	0	Bacteria	Firmicutes	Clostridia	Lachnospirales	Lachnospiraceae	[Eubacterium] fissicatena group
ZCML_adjusted	ASV369	-0.0905869	-0.248766	0.0675927	0.0806112	0.261379	1052	42.2053	0	0	22	Bacteria	Firmicutes	Clostridia	Oscillospirales	Ruminococcaceae	Negativibacillus
ZCML_adjusted	ASV3	0.133032	-0.100012	0.366075	0.118763	0.262914	1052	68.346	68.5	0	599	Bacteria	Proteobacteria	Gammaproteobacteria	Enterobacterales	Enterobacteriaceae	Escherichia-Shigella
ZCEL_adjusted	ASV1415	-0.0525847	-0.14522	0.0400502	0.0472085	0.265587	1052	14.3536	0	0	0	Bacteria	Firmicutes	Bacilli	Erysipelotrichales	Erysipelotrichaceae	Merdibacter
ZCML_adjusted	ASV765	-0.027341	-0.075872	0.02119	0.0247323	0.269209	1052	1.42586	0	0	0	Bacteria	Proteobacteria	Gammaproteobacteria	Enterobacterales	Enterobacteriaceae	Citrobacter
ZCEL_adjusted	ASV159	0.0926392	-0.0726119	0.25789	0.084215	0.271573	1052	30.7985	0	0	22	Bacteria	Actinobacteriota	Coriobacteriia	Coriobacteriales	Coriobacteriaceae	Collinsella
ZMGH1_adjusted	ASV378	-0.0807756	-0.22497	0.0634184	0.0734839	0.271923	1052	41.0646	0	0	13	Bacteria	Firmicutes	Clostridia	Oscillospirales	Ruminococcaceae	DTU089
ZCEL_adjusted	ASV273	-0.0848371	-0.23732	0.0676459	0.0777082	0.275201	1052	65.8745	16	0	40	Bacteria	Firmicutes	Clostridia	Peptostreptococcales-Tissierellales	Anaerovoracaceae	Family XIII UCG-001
ZCEL_adjusted	ASV918	0.0412145	-0.0329208	0.11535	0.0377807	0.275575	1052	6.36882	0	0	0	Bacteria	Firmicutes	Bacilli	Lactobacillales	Lactobacillaceae	Lacticaseibacillus
ZMGH1_adjusted	ASV3115	0.0248255	-0.0199284	0.0695795	0.0228074	0.276634	1052	3.04183	0	0	0	Bacteria	Firmicutes	Bacilli	Lactobacillales	Lactobacillaceae	Leuconostoc
ZCEL_adjusted	ASV229	-0.0605951	-0.170879	0.0496884	0.0562025	0.281214	1052	10.7414	0	0	0	Bacteria	Firmicutes	Bacilli	Lactobacillales	Enterococcaceae	Enterococcus
ZCML_adjusted	ASV1195	0.0493674	-0.0410249	0.13976	0.0460656	0.284115	1052	15.9696	0	0	0	Bacteria	Firmicutes	Clostridia	Oscillospirales	Oscillospiraceae	UCG-007
ZMGH1_adjusted	ASV715	-0.0288166	-0.0816075	0.0239743	0.0269032	0.284364	1052	1.52091	0	0	0	Bacteria	Proteobacteria	Gammaproteobacteria	Enterobacterales	Hafniaceae	Hafnia-Obesumbacterium
ZCML_adjusted	ASV2915	0.029672	-0.0248254	0.0841694	0.0277729	0.285598	1052	3.9924	0	0	0	Bacteria	Actinobacteriota	Actinobacteria	Actinomycetales	Actinomycetaceae	Actinomyces
ZMGH1_adjusted	ASV3537	0.0187935	-0.0158081	0.0533951	0.0176336	0.286773	1052	1.3308	0	0	0	Bacteria	Firmicutes	Bacilli	Erysipelotrichales	Erysipelotrichaceae	Dielma
ZCEL_adjusted	ASV47	-0.0915633	-0.262388	0.0792617	0.0870556	0.293145	1052	17.4905	0	0	0	Bacteria	Firmicutes	Clostridia	Lachnospirales	Lachnospiraceae	Butyrivibrio
ZCEL_adjusted	ASV283	0.080649	-0.0703239	0.231622	0.0769386	0.294779	1052	28.5171	0	0	14	Bacteria	Actinobacteriota	Coriobacteriia	Coriobacteriales	Eggerthellaceae	Senegalimassilia
ZCML_adjusted	ASV715	-0.0281531	-0.0809466	0.0246403	0.0269045	0.295615	1052	1.52091	0	0	0	Bacteria	Proteobacteria	Gammaproteobacteria	Enterobacterales	Hafniaceae	Hafnia-Obesumbacterium
ZMGH1_adjusted	ASV197	0.0860921	-0.075712	0.247896	0.0824584	0.296697	1052	25.4753	0	0	3	Bacteria	Firmicutes	Clostridia	Lachnospirales	Lachnospiraceae	Tyzzerella
ZCEL_adjusted	ASV434	0.0702762	-0.0629399	0.203492	0.0678894	0.300836	1052	24.5247	0	0	0	Bacteria	Firmicutes	Clostridia	Oscillospirales	Oscillospiraceae	Flavonifractor
ZMGH1_adjusted	ASV39	0.0769693	-0.0690193	0.222958	0.0743985	0.301118	1052	86.5019	118	38.75	242.25	Bacteria	Firmicutes	Clostridia	Lachnospirales	Lachnospiraceae	Lachnospiraceae ND3007 group
ZCML_adjusted	ASV16	-0.100229	-0.291139	0.0906813	0.0972913	0.30316	1052	78.0418	110	11	344.25	Bacteria	Firmicutes	Clostridia	Peptostreptococcales-Tissierellales	Peptostreptococcaceae	Romboutsia
ZCML_adjusted	ASV2040	-0.0342184	-0.0995503	0.0311134	0.0332943	0.304304	1052	9.31559	0	0	0	Bacteria	Firmicutes	Clostridia	Eubacteriales	Anaerofustaceae	Anaerofustis
ZMGH1_adjusted	ASV383	0.0522021	-0.0477069	0.152111	0.0509155	0.305475	1052	10.3612	0	0	0	Bacteria	Firmicutes	Clostridia	Lachnospirales	Lachnospiraceae	Hungatella
ZMGH1_adjusted	ASV56	0.0707098	-0.0648907	0.20631	0.0691045	0.306437	1052	92.0152	164.5	43.75	455.25	Bacteria	Bacteroidota	Bacteroidia	Bacteroidales	Rikenellaceae	Alistipes
ZMGH1_adjusted	ASV765	-0.0253048	-0.0738387	0.0232292	0.0247338	0.306507	1052	1.42586	0	0	0	Bacteria	Proteobacteria	Gammaproteobacteria	Enterobacterales	Enterobacteriaceae	Citrobacter
ZCML_adjusted	ASV80	0.086097	-0.0793458	0.25154	0.0843127	0.307415	1052	79.1825	60	12	176.5	Bacteria	Firmicutes	Clostridia	Lachnospirales	Lachnospiraceae	Lachnospira
ZCEL_adjusted	ASV2915	0.0281643	-0.0261222	0.0824508	0.0276654	0.308899	1052	3.9924	0	0	0	Bacteria	Actinobacteriota	Actinobacteria	Actinomycetales	Actinomycetaceae	Actinomyces
ZMGH1_adjusted	ASV42	-0.102545	-0.301363	0.0962733	0.101321	0.311738	1052	71.9582	57	0	302	Bacteria	Firmicutes	Clostridia	Clostridiales	Clostridiaceae	Clostridium sensu stricto 1
ZCML_adjusted	ASV2250	0.0267178	-0.0254693	0.0789048	0.0265955	0.315324	1052	4.08745	0	0	0	Bacteria	Firmicutes	Bacilli	Lactobacillales	Carnobacteriaceae	Granulicatella
ZCEL_adjusted	ASV186	-0.0825344	-0.244145	0.0790761	0.0823597	0.316519	1052	60.4563	16	0	51	Bacteria	Firmicutes	Clostridia	Oscillospirales	Oscillospiraceae	Intestinimonas
ZMGH1_adjusted	ASV434	0.0679121	-0.0658304	0.201655	0.0681577	0.319289	1052	24.5247	0	0	0	Bacteria	Firmicutes	Clostridia	Oscillospirales	Oscillospiraceae	Flavonifractor
ZCEL_adjusted	ASV726	0.0533165	-0.0519221	0.158555	0.0536316	0.320393	1052	22.4335	0	0	0	Bacteria	Bacteroidota	Bacteroidia	Bacteroidales	Barnesiellaceae	Coprobacter
ZMGH1_adjusted	ASV176	-0.0972679	-0.290393	0.0958571	0.0984201	0.323239	1052	39.7338	0	0	56.25	Bacteria	Bacteroidota	Bacteroidia	Bacteroidales	Prevotellaceae	Paraprevotella
ZMGH1_adjusted	ASV429	0.0584843	-0.0578763	0.174845	0.0592995	0.324239	1052	16.8251	0	0	0	Bacteria	Proteobacteria	Gammaproteobacteria	Enterobacterales	Pasteurellaceae	Haemophilus
ZCEL_adjusted	ASV176	-0.0966227	-0.288995	0.09575	0.0980367	0.324571	1052	39.7338	0	0	56.25	Bacteria	Bacteroidota	Bacteroidia	Bacteroidales	Prevotellaceae	Paraprevotella
ZCML_adjusted	ASV1481	0.0368664	-0.036736	0.110469	0.0375092	0.325903	1052	9.69582	0	0	0	Archaea	Euryarchaeota	Methanobacteria	Methanobacteriales	Methanobacteriaceae	Methanobrevibacter
ZCEL_adjusted	ASV264	0.0572092	-0.0579758	0.172394	0.0587004	0.329988	1052	7.22433	0	0	0	Bacteria	Bacteroidota	Bacteroidia	Bacteroidales	Prevotellaceae	Prevotellaceae NK3B31 group
ZCML_adjusted	ASV5	-0.0486476	-0.147113	0.0498181	0.05018	0.33254	1052	98.0989	1220	506.25	2536.5	Bacteria	Firmicutes	Clostridia	Oscillospirales	Ruminococcaceae	Faecalibacterium
ZCML_adjusted	ASV2874	0.0269359	-0.0277381	0.08161	0.0278629	0.333903	1052	4.37262	0	0	0	Bacteria	Firmicutes	Clostridia	Oscillospirales	Ruminococcaceae	Pygmaiobacter
ZMGH1_adjusted	ASV1204	0.0385063	-0.0397909	0.116804	0.0399017	0.334755	1052	5.98859	0	0	0	Bacteria	Firmicutes	Clostridia	Lachnospirales	Lachnospiraceae	FD2005
ZMGH1_adjusted	ASV918	0.0365172	-0.0379177	0.110952	0.0379334	0.33594	1052	6.36882	0	0	0	Bacteria	Firmicutes	Bacilli	Lactobacillales	Lactobacillaceae	Lacticaseibacillus
ZCEL_adjusted	ASV44	0.104863	-0.110585	0.320311	0.109796	0.339765	1052	33.4601	0	0	87.5	Bacteria	Firmicutes	Negativicutes	Veillonellales-Selenomonadales	Veillonellaceae	Dialister
ZCML_adjusted	ASV98	0.0832205	-0.0880514	0.254492	0.0872833	0.340583	1052	21.673	0	0	0	Bacteria	Firmicutes	Clostridia	Lachnospirales	Lachnospiraceae	[Ruminococcus] gnavus group
ZCEL_adjusted	ASV23	-0.0672694	-0.206704	0.0721656	0.0710587	0.344025	1052	93.251	578	222.75	1222.25	Bacteria	Firmicutes	Clostridia	Oscillospirales	Ruminococcaceae	Ruminococcus
ZMGH1_adjusted	ASV102	-0.0979832	-0.302765	0.106799	0.104361	0.348006	1052	43.6312	0	0	100.25	Bacteria	Firmicutes	Negativicutes	Acidaminococcales	Acidaminococcaceae	Phascolarctobacterium
ZMGH1_adjusted	ASV2	0.0581778	-0.0637021	0.180058	0.0621123	0.349154	1052	95.8175	859.5	385	1711.75	Bacteria	Firmicutes	Clostridia	Lachnospirales	Lachnospiraceae	Agathobacter
ZCEL_adjusted	ASV4620	0.0173713	-0.0193241	0.0540668	0.0187007	0.353149	1052	1.61597	0	0	0	Bacteria	Firmicutes	Clostridia	Peptostreptococcales-Tissierellales	Family XI	Finegoldia
ZCEL_adjusted	ASV76	-0.088449	-0.277778	0.10088	0.0964858	0.35951	1052	49.4297	0	0	57.25	Bacteria	Verrucomicrobiota	Verrucomicrobiae	Verrucomicrobiales	Akkermansiaceae	Akkermansia
ZMGH1_adjusted	ASV1513	0.0311195	-0.0356796	0.0979186	0.0340421	0.360851	1052	4.37262	0	0	0	Bacteria	Firmicutes	Bacilli	Erysipelotrichales	Erysipelotrichaceae	Faecalitalea
ZCML_adjusted	ASV2005	0.0194755	-0.0224	0.0613509	0.0213405	0.361661	1052	1.3308	0	0	0	Bacteria	Proteobacteria	Gammaproteobacteria	Enterobacterales	Succinivibrionaceae	Succinivibrio
ZCML_adjusted	ASV422	-0.051487	-0.162325	0.0593512	0.0564852	0.362237	1052	10.4563	0	0	0	Bacteria	Firmicutes	Negativicutes	Acidaminococcales	Acidaminococcaceae	Acidaminococcus
ZCML_adjusted	ASV1415	-0.0429781	-0.135996	0.0500403	0.0474039	0.364809	1052	14.3536	0	0	0	Bacteria	Firmicutes	Bacilli	Erysipelotrichales	Erysipelotrichaceae	Merdibacter
ZCML_adjusted	ASV44	0.0992741	-0.117032	0.31558	0.110234	0.368022	1052	33.4601	0	0	87.5	Bacteria	Firmicutes	Negativicutes	Veillonellales-Selenomonadales	Veillonellaceae	Dialister
ZCML_adjusted	ASV23	-0.0640918	-0.204082	0.0758981	0.0713414	0.369191	1052	93.251	578	222.75	1222.25	Bacteria	Firmicutes	Clostridia	Oscillospirales	Ruminococcaceae	Ruminococcus
ZMGH1_adjusted	ASV369	-0.0723098	-0.230521	0.0859011	0.0806272	0.370012	1052	42.2053	0	0	22	Bacteria	Firmicutes	Clostridia	Oscillospirales	Ruminococcaceae	Negativibacillus
ZCML_adjusted	ASV229	-0.0502419	-0.160979	0.0604954	0.0564338	0.373522	1052	10.7414	0	0	0	Bacteria	Firmicutes	Bacilli	Lactobacillales	Enterococcaceae	Enterococcus
ZCML_adjusted	ASV1396	0.0438183	-0.0535393	0.141176	0.0496152	0.377353	1052	22.2433	0	0	0	Bacteria	Firmicutes	Bacilli	Erysipelotrichales	Erysipelotrichaceae	Holdemania
ZCML_adjusted	ASV1368	0.0402783	-0.049569	0.130126	0.0457879	0.37924	1052	18.8213	0	0	0	Bacteria	Firmicutes	Clostridia	Oscillospirales	Ruminococcaceae	Candidatus Soleaferrea
ZMGH1_adjusted	ASV1551	0.0405391	-0.0499648	0.131043	0.0461224	0.379635	1052	9.03042	0	0	0	Bacteria	Actinobacteriota	Coriobacteriia	Coriobacteriales	Atopobiaceae	Olsenella
ZMGH1_adjusted	ASV151	-0.0689228	-0.222982	0.0851362	0.0785113	0.380217	1052	64.5437	12	0	30	Bacteria	Firmicutes	Clostridia	Oscillospirales	Ruminococcaceae	UBA1819
ZCEL_adjusted	ASV98	0.0761188	-0.0944933	0.246731	0.0869471	0.381526	1052	21.673	0	0	0	Bacteria	Firmicutes	Clostridia	Lachnospirales	Lachnospiraceae	[Ruminococcus] gnavus group
ZCEL_adjusted	ASV712	0.0491123	-0.0614358	0.15966	0.0563374	0.383544	1052	21.3878	0	0	0	Bacteria	Firmicutes	Clostridia	Peptostreptococcales-Tissierellales	Anaerovoracaceae	[Eubacterium] brachy group
ZMGH1_adjusted	ASV621	-0.0499789	-0.162634	0.0626759	0.0574109	0.384203	1052	13.9734	0	0	0	Bacteria	Firmicutes	Clostridia	Lachnospirales	Lachnospiraceae	Eisenbergiella
ZMGH1_adjusted	ASV330	-0.050895	-0.166429	0.0646391	0.0588783	0.387562	1052	10.6464	0	0	0	Bacteria	Bacteroidota	Bacteroidia	Bacteroidales	Prevotellaceae	Prevotella_7
ZMGH1_adjusted	ASV1195	0.0394898	-0.0509184	0.129898	0.0460737	0.391587	1052	15.9696	0	0	0	Bacteria	Firmicutes	Clostridia	Oscillospirales	Oscillospiraceae	UCG-007
ZCML_adjusted	ASV2651	-0.0190724	-0.0628043	0.0246595	0.0222866	0.392318	1052	1.90114	0	0	0	Bacteria	Firmicutes	Clostridia	Lachnospirales	Lachnospiraceae	Lactonifactor
ZCML_adjusted	ASV447	0.0218576	-0.0289727	0.0726879	0.0259041	0.398981	1052	1.3308	0	0	0	Bacteria	Proteobacteria	Gammaproteobacteria	Enterobacterales	Enterobacteriaceae	Enterobacter
ZCEL_adjusted	ASV341	0.0186455	-0.0248343	0.0621253	0.0221581	0.400275	1052	0.95057	0	0	0	Bacteria	Bacteroidota	Bacteroidia	Bacteroidales	Rikenellaceae	Rikenellaceae RC9 gut group
ZCML_adjusted	ASV76	-0.0814326	-0.27152	0.108654	0.0968718	0.400753	1052	49.4297	0	0	57.25	Bacteria	Verrucomicrobiota	Verrucomicrobiae	Verrucomicrobiales	Akkermansiaceae	Akkermansia
ZCML_adjusted	ASV430	0.0569473	-0.0766764	0.190571	0.0680971	0.403198	1052	34.7909	0	0	14	Bacteria	Firmicutes	Clostridia	Lachnospirales	Lachnospiraceae	GCA-900066575
ZMGH1_adjusted	ASV447	0.0216572	-0.0291722	0.0724867	0.0259036	0.403308	1052	1.3308	0	0	0	Bacteria	Proteobacteria	Gammaproteobacteria	Enterobacterales	Enterobacteriaceae	Enterobacter
ZCML_adjusted	ASV56	-0.0577575	-0.193384	0.0778688	0.0691177	0.40355	1052	92.0152	164.5	43.75	455.25	Bacteria	Bacteroidota	Bacteroidia	Bacteroidales	Rikenellaceae	Alistipes
ZCEL_adjusted	ASV246	-0.0601689	-0.201877	0.0815387	0.0722168	0.40494	1052	22.7186	0	0	0	Bacteria	Firmicutes	Clostridia	Lachnospirales	Lachnospiraceae	Lachnospiraceae AC2044 group
ZCML_adjusted	ASV93	0.057384	-0.0781713	0.192939	0.0690815	0.406351	1052	90.7795	143.5	48	318	Bacteria	Firmicutes	Clostridia	Lachnospirales	Lachnospiraceae	Lachnoclostridium
ZCEL_adjusted	ASV80	-0.0696577	-0.23448	0.0951646	0.0839965	0.40713	1052	79.1825	60	12	176.5	Bacteria	Firmicutes	Clostridia	Lachnospirales	Lachnospiraceae	Lachnospira
ZMGH1_adjusted	ASV2005	-0.0176164	-0.0594939	0.0242611	0.0213416	0.409306	1052	1.3308	0	0	0	Bacteria	Proteobacteria	Gammaproteobacteria	Enterobacterales	Succinivibrionaceae	Succinivibrio
ZCEL_adjusted	ASV193	0.0686883	-0.0947301	0.232107	0.083281	0.409688	1052	50.3802	5	0	38	Bacteria	Firmicutes	Clostridia	Oscillospirales	Oscillospiraceae	UCG-003
ZMGH1_adjusted	ASV35	-0.0619924	-0.210247	0.0862622	0.0755533	0.412112	1052	90.3992	261.5	51.75	737.5	Bacteria	Firmicutes	Clostridia	Christensenellales	Christensenellaceae	Christensenellaceae R-7 group
ZCEL_adjusted	ASV2119	0.0283933	-0.0396193	0.0964059	0.0346605	0.41287	1052	9.5057	0	0	0	Bacteria	Firmicutes	Clostridia	Christensenellales	Christensenellaceae	Christensenella
ZCML_adjusted	ASV554	-0.0354262	-0.120966	0.0501139	0.0435928	0.416598	1052	5.03802	0	0	0	Bacteria	Firmicutes	Clostridia	Lachnospirales	Lachnospiraceae	[Bacteroides] pectinophilus group
ZCML_adjusted	ASV238	0.0692704	-0.0981511	0.236692	0.0853211	0.417047	1052	46.8631	0	0	35.25	Bacteria	Firmicutes	Clostridia	Lachnospirales	Lachnospiraceae	Lachnospiraceae UCG-004
ZCEL_adjusted	ASV16	-0.0785147	-0.268713	0.111684	0.0969287	0.418112	1052	78.0418	110	11	344.25	Bacteria	Firmicutes	Clostridia	Peptostreptococcales-Tissierellales	Peptostreptococcaceae	Romboutsia
ZCEL_adjusted	ASV3115	0.0183139	-0.0262771	0.0629049	0.0227244	0.420477	1052	3.04183	0	0	0	Bacteria	Firmicutes	Bacilli	Lactobacillales	Lactobacillaceae	Leuconostoc
ZCEL_adjusted	ASV242	0.0661406	-0.0961323	0.228413	0.0826972	0.424014	1052	40.3992	0	0	21	Bacteria	Firmicutes	Clostridia	Lachnospirales	Lachnospiraceae	Lachnospiraceae UCG-010
ZCML_adjusted	ASV414	-0.0364559	-0.12619	0.0532785	0.0457303	0.425521	1052	8.93536	0	0	0	Bacteria	Firmicutes	Bacilli	Lactobacillales	Lactobacillaceae	Latilactobacillus
ZCML_adjusted	ASV8	-0.043344	-0.150238	0.06355	0.0544752	0.426408	1052	96.673	653.5	319.75	1284.75	Bacteria	Firmicutes	Clostridia	Oscillospirales	Ruminococcaceae	Subdoligranulum
ZCML_adjusted	ASV67	-0.0466777	-0.162753	0.0693975	0.0591541	0.430241	1052	92.2053	75	29	141.25	Bacteria	Firmicutes	Clostridia	Monoglobales	Monoglobaceae	Monoglobus
ZCML_adjusted	ASV1176	-0.0270284	-0.094393	0.0403361	0.0343302	0.431281	1052	5.89354	0	0	0	Bacteria	Firmicutes	Clostridia	Peptostreptococcales-Tissierellales	Anaerovoracaceae	[Eubacterium] nodatum group
ZCEL_adjusted	ASV1534	-0.0381661	-0.133327	0.0569948	0.0484957	0.431462	1052	20.057	0	0	0	Bacteria	Firmicutes	Clostridia	Oscillospirales	Butyricicoccaceae	UCG-009
ZCML_adjusted	ASV537	0.0495544	-0.074332	0.173441	0.0631348	0.432693	1052	17.3954	0	0	0	Bacteria	Firmicutes	Negativicutes	Veillonellales-Selenomonadales	Veillonellaceae	Veillonella
ZCML_adjusted	ASV146	0.0715539	-0.107721	0.250829	0.0913619	0.433693	1052	46.8631	0	0	40	Bacteria	Firmicutes	Bacilli	Erysipelotrichales	Erysipelotrichaceae	Turicibacter
ZMGH1_adjusted	ASV1128	-0.0255688	-0.089896	0.0387585	0.0327824	0.435595	1052	3.04183	0	0	0	Bacteria	Bacteroidota	Bacteroidia	Bacteroidales	Prevotellaceae	Prevotella
ZCML_adjusted	ASV53	0.0811707	-0.123406	0.285748	0.104256	0.436411	1052	36.9772	0	0	66	Bacteria	Firmicutes	Clostridia	Lachnospirales	Lachnospiraceae	[Eubacterium] ruminantium group
ZCEL_adjusted	ASV1568	0.0384659	-0.0591042	0.136036	0.0497235	0.439346	1052	19.2966	0	0	0	Bacteria	Firmicutes	Clostridia	Oscillospirales	Ruminococcaceae	Anaerotruncus
ZCML_adjusted	ASV355	0.0627011	-0.0966042	0.222006	0.081185	0.440098	1052	36.8821	0	0	18	Bacteria	Proteobacteria	Gammaproteobacteria	Burkholderiales	Sutterellaceae	Sutterella
ZCEL_adjusted	ASV33	-0.0834388	-0.296788	0.12991	0.108727	0.443007	1052	49.9049	0	0	145.25	Bacteria	Firmicutes	Clostridia	Peptostreptococcales-Tissierellales	Peptostreptococcaceae	Intestinibacter
ZMGH1_adjusted	ASV401	0.0573411	-0.0911402	0.205822	0.0756688	0.448748	1052	34.1255	0	0	9.25	Bacteria	Proteobacteria	Gammaproteobacteria	Burkholderiales	Sutterellaceae	Parasutterella
ZMGH1_adjusted	ASV2061	-0.0279018	-0.100562	0.0447586	0.0370291	0.451314	1052	9.22053	0	0	0	Bacteria	Firmicutes	Clostridia	Oscillospirales	Ruminococcaceae	Caproiciproducens
ZCEL_adjusted	ASV177	-0.0341718	-0.123367	0.0550238	0.0454557	0.452366	1052	4.18251	0	0	0	Bacteria	Firmicutes	Negativicutes	Acidaminococcales	Acidaminococcaceae	Succiniclasticum
ZCML_adjusted	ASV768	0.0475059	-0.0766636	0.171675	0.0632791	0.452982	1052	25.9506	0	0	4	Bacteria	Bacteroidota	Bacteroidia	Bacteroidales	Marinifilaceae	Butyricimonas
ZCEL_adjusted	ASV67	0.0441844	-0.071439	0.159808	0.0589238	0.453511	1052	92.2053	75	29	141.25	Bacteria	Firmicutes	Clostridia	Monoglobales	Monoglobaceae	Monoglobus
ZMGH1_adjusted	ASV576	0.0391528	-0.0637914	0.142097	0.0524623	0.455653	1052	10.1711	0	0	0	Bacteria	Actinobacteriota	Coriobacteriia	Coriobacteriales	Eggerthellaceae	Eggerthella
ZCEL_adjusted	ASV3567	0.0158619	-0.025889	0.0576128	0.021277	0.456142	1052	2.09125	0	0	0	Bacteria	Firmicutes	Bacilli	Erysipelotrichales	Erysipelotrichaceae	Faecalicoccus
ZCEL_adjusted	ASV3	-0.0878305	-0.320039	0.144378	0.118338	0.458134	1052	68.346	68.5	0	599	Bacteria	Proteobacteria	Gammaproteobacteria	Enterobacterales	Enterobacteriaceae	Escherichia-Shigella
ZCML_adjusted	ASV1784	-0.0348098	-0.127972	0.0583524	0.0474772	0.463608	1052	16.9202	0	0	0	Bacteria	Proteobacteria	Gammaproteobacteria	Burkholderiales	Oxalobacteraceae	Oxalobacter
ZCEL_adjusted	ASV537	0.0460083	-0.0773972	0.169414	0.0628897	0.464596	1052	17.3954	0	0	0	Bacteria	Firmicutes	Negativicutes	Veillonellales-Selenomonadales	Veillonellaceae	Veillonella
ZMGH1_adjusted	ASV1139	-0.0237384	-0.0874844	0.0400077	0.0324862	0.465114	1052	4.46768	0	0	0	Bacteria	Firmicutes	Clostridia	Lachnospirales	Lachnospiraceae	Lachnospiraceae UCG-009
ZMGH1_adjusted	ASV89	0.0706111	-0.119094	0.260316	0.0966772	0.465323	1052	54.8479	21	0	98.25	Bacteria	Firmicutes	Clostridia	Lachnospirales	Lachnospiraceae	CAG-56
ZCEL_adjusted	ASV2101	-0.0288364	-0.106784	0.0491114	0.0397236	0.468048	1052	8.74525	0	0	0	Bacteria	Firmicutes	Clostridia	Lachnospirales	Lachnospiraceae	Catenibacillus
ZCML_adjusted	ASV273	-0.0564483	-0.209581	0.0966842	0.0780391	0.469638	1052	65.8745	16	0	40	Bacteria	Firmicutes	Clostridia	Peptostreptococcales-Tissierellales	Anaerovoracaceae	Family XIII UCG-001
ZCEL_adjusted	ASV71	0.0584337	-0.101605	0.218472	0.0815586	0.473866	1052	80.3232	61	9	180.25	Bacteria	Bacteroidota	Bacteroidia	Bacteroidales	Tannerellaceae	Parabacteroides
ZCML_adjusted	ASV589	-0.0313364	-0.11777	0.0550972	0.0440482	0.476989	1052	4.65779	0	0	0	Bacteria	Firmicutes	Negativicutes	Veillonellales-Selenomonadales	Veillonellaceae	Megasphaera
ZMGH1_adjusted	ASV283	-0.0547865	-0.206394	0.0968207	0.0772618	0.47842	1052	28.5171	0	0	14	Bacteria	Actinobacteriota	Coriobacteriia	Coriobacteriales	Eggerthellaceae	Senegalimassilia
ZCML_adjusted	ASV429	0.0419938	-0.0743959	0.158383	0.0593143	0.479112	1052	16.8251	0	0	0	Bacteria	Proteobacteria	Gammaproteobacteria	Enterobacterales	Pasteurellaceae	Haemophilus
ZMGH1_adjusted	ASV355	0.0570675	-0.102242	0.216377	0.0811871	0.482268	1052	36.8821	0	0	18	Bacteria	Proteobacteria	Gammaproteobacteria	Burkholderiales	Sutterellaceae	Sutterella
ZMGH1_adjusted	ASV2211	-0.0271475	-0.103389	0.0490939	0.038854	0.484893	1052	7.98479	0	0	0	Bacteria	Firmicutes	Negativicutes	Veillonellales-Selenomonadales	Veillonellaceae	Allisonella
ZMGH1_adjusted	ASV161	-0.0379571	-0.144831	0.0689165	0.0544648	0.486014	1052	6.27376	0	0	0	Bacteria	Bacteroidota	Bacteroidia	Bacteroidales	Muribaculaceae	CAG-873
ZMGH1_adjusted	ASV200	-0.0389487	-0.148904	0.0710061	0.056035	0.487162	1052	91.1597	45	17	95	Bacteria	Firmicutes	Clostridia	Peptostreptococcales-Tissierellales	Anaerovoracaceae	Family XIII AD3011 group
ZCEL_adjusted	ASV146	-0.0631001	-0.241684	0.115483	0.0910095	0.488254	1052	46.8631	0	0	40	Bacteria	Firmicutes	Bacilli	Erysipelotrichales	Erysipelotrichaceae	Turicibacter
ZCML_adjusted	ASV1812	-0.0192703	-0.0738685	0.035328	0.0278243	0.488734	1052	3.89734	0	0	0	Bacteria	Firmicutes	Clostridia	Eubacteriales	Eubacteriaceae	Eubacterium
ZMGH1_adjusted	ASV1534	-0.0335954	-0.129135	0.0619445	0.0486889	0.490348	1052	20.057	0	0	0	Bacteria	Firmicutes	Clostridia	Oscillospirales	Butyricicoccaceae	UCG-009
ZCEL_adjusted	ASV446	-0.0460545	-0.177029	0.0849199	0.066747	0.490357	1052	20.1521	0	0	0	Bacteria	Actinobacteriota	Coriobacteriia	Coriobacteriales	Eggerthellaceae	Enterorhabdus
ZCEL_adjusted	ASV93	0.0474755	-0.0875622	0.182513	0.0688177	0.490428	1052	90.7795	143.5	48	318	Bacteria	Firmicutes	Clostridia	Lachnospirales	Lachnospiraceae	Lachnoclostridium
ZCEL_adjusted	ASV53	-0.0715116	-0.2753	0.132277	0.103854	0.491244	1052	36.9772	0	0	66	Bacteria	Firmicutes	Clostridia	Lachnospirales	Lachnospiraceae	[Eubacterium] ruminantium group
ZMGH1_adjusted	ASV4217	-0.0134634	-0.0519826	0.0250558	0.0196301	0.492957	1052	2.18631	0	0	0	Bacteria	Actinobacteriota	Coriobacteriia	Coriobacteriales	Atopobiaceae	Atopobium
ZMGH1_adjusted	ASV589	-0.0301003	-0.116534	0.056333	0.044048	0.494537	1052	4.65779	0	0	0	Bacteria	Firmicutes	Negativicutes	Veillonellales-Selenomonadales	Veillonellaceae	Megasphaera
ZCEL_adjusted	ASV56	0.0468161	-0.0882939	0.181926	0.0688545	0.496702	1052	92.0152	164.5	43.75	455.25	Bacteria	Bacteroidota	Bacteroidia	Bacteroidales	Rikenellaceae	Alistipes
ZCEL_adjusted	ASV251	0.0522351	-0.0989332	0.203403	0.0770382	0.497896	1052	60.076	8	0	32	Bacteria	Bacteroidota	Bacteroidia	Bacteroidales	Marinifilaceae	Odoribacter
ZCML_adjusted	ASV3648	0.0143346	-0.0272288	0.0558981	0.0211815	0.498714	1052	2.75665	0	0	0	Bacteria	Firmicutes	Clostridia	Lachnospirales	Lachnospiraceae	GCA-900066755
ZMGH1_adjusted	ASV286	0.0524438	-0.0996464	0.204534	0.077508	0.498795	1052	26.9962	0	0	13	Bacteria	Firmicutes	Clostridia	Lachnospirales	Lachnospiraceae	Howardella
ZCML_adjusted	ASV135	0.0517919	-0.100767	0.204351	0.077747	0.505458	1052	76.9962	41	8	93	Bacteria	Firmicutes	Clostridia	Lachnospirales	Lachnospiraceae	Lachnospiraceae FCS020 group
ZCML_adjusted	ASV284	0.0241396	-0.0470057	0.0952848	0.0362569	0.505692	1052	2.37643	0	0	0	Bacteria	Firmicutes	Negativicutes	Veillonellales-Selenomonadales	Selenomonadaceae	Megamonas
ZCEL_adjusted	ASV3333	0.0132886	-0.0259099	0.0524871	0.0199763	0.506057	1052	1.90114	0	0	0	Bacteria	Firmicutes	Clostridia	Lachnospirales	Lachnospiraceae	CHKCI001
ZCML_adjusted	ASV1015	0.0283527	-0.0556171	0.112323	0.0427926	0.507759	1052	9.79087	0	0	0	Bacteria	Firmicutes	Clostridia	Peptostreptococcales-Tissierellales	Anaerovoracaceae	Mogibacterium
ZCEL_adjusted	ASV765	-0.0161504	-0.0645095	0.0322088	0.0246447	0.512402	1052	1.42586	0	0	0	Bacteria	Proteobacteria	Gammaproteobacteria	Enterobacterales	Enterobacteriaceae	Citrobacter
ZCML_adjusted	ASV30	-0.0739628	-0.296902	0.148977	0.113614	0.51519	1052	31.749	0	0	84.25	Bacteria	Firmicutes	Clostridia	Oscillospirales	Ruminococcaceae	CAG-352
ZCML_adjusted	ASV898	0.0271575	-0.0551601	0.109475	0.0419506	0.517537	1052	6.93916	0	0	0	Bacteria	Firmicutes	Bacilli	Erysipelotrichales	Erysipelotrichaceae	Catenisphaera
ZCEL_adjusted	ASV286	0.049751	-0.101749	0.201251	0.0772074	0.519471	1052	26.9962	0	0	13	Bacteria	Firmicutes	Clostridia	Lachnospirales	Lachnospiraceae	Howardella
ZCML_adjusted	ASV1062	-0.0398884	-0.163188	0.0834108	0.0628356	0.525695	1052	39.924	0	0	8	Bacteria	Firmicutes	Clostridia	Lachnospirales	Defluviitaleaceae	Defluviitaleaceae UCG-011
ZMGH1_adjusted	ASV5	-0.031387	-0.129876	0.0671025	0.0501921	0.531887	1052	98.0989	1220	506.25	2536.5	Bacteria	Firmicutes	Clostridia	Oscillospirales	Ruminococcaceae	Faecalibacterium
ZCML_adjusted	ASV1020	0.0125264	-0.0268792	0.0519319	0.0200818	0.532917	1052	1.04563	0	0	0	Bacteria	Firmicutes	Bacilli	Lactobacillales	Lactobacillaceae	HT002
ZCML_adjusted	ASV181	0.0537044	-0.115705	0.223114	0.0863343	0.534045	1052	65.8745	29	0	82	Bacteria	Firmicutes	Clostridia	Lachnospirales	Lachnospiraceae	Marvinbryantia
ZCML_adjusted	ASV3567	-0.0131509	-0.0550697	0.0287679	0.0213626	0.538291	1052	2.09125	0	0	0	Bacteria	Firmicutes	Bacilli	Erysipelotrichales	Erysipelotrichaceae	Faecalicoccus
ZCML_adjusted	ASV1139	-0.0199714	-0.0837237	0.043781	0.0324894	0.538885	1052	4.46768	0	0	0	Bacteria	Firmicutes	Clostridia	Lachnospirales	Lachnospiraceae	Lachnospiraceae UCG-009
ZMGH1_adjusted	ASV166	0.0454907	-0.100091	0.191072	0.074191	0.539908	1052	13.308	0	0	0	Bacteria	Firmicutes	Bacilli	Erysipelotrichales	Erysipelatoclostridiaceae	Catenibacterium
ZCML_adjusted	ASV6	-0.0336142	-0.141849	0.0746202	0.0551582	0.542384	1052	96.673	700	330.75	1266.25	Bacteria	Firmicutes	Clostridia	Lachnospirales	Lachnospiraceae	[Eubacterium] hallii group
ZMGH1_adjusted	ASV1812	-0.0168481	-0.0714481	0.0377518	0.0278251	0.54498	1052	3.89734	0	0	0	Bacteria	Firmicutes	Clostridia	Eubacteriales	Eubacteriaceae	Eubacterium
ZCML_adjusted	ASV1268	-0.0188756	-0.0800816	0.0423303	0.0311917	0.545212	1052	4.37262	0	0	0	Bacteria	Synergistota	Synergistia	Synergistales	Synergistaceae	Cloacibacillus
ZCML_adjusted	ASV3333	0.0120822	-0.027272	0.0514365	0.0200557	0.547016	1052	1.90114	0	0	0	Bacteria	Firmicutes	Clostridia	Lachnospirales	Lachnospiraceae	CHKCI001
ZMGH1_adjusted	ASV1024	0.0292957	-0.0669348	0.125526	0.0490408	0.550389	1052	18.0608	0	0	0	Bacteria	Patescibacteria	Saccharimonadia	Saccharimonadales	Saccharimonadaceae	TM7x
ZCEL_adjusted	ASV401	0.0448185	-0.1031	0.192737	0.0753819	0.552272	1052	34.1255	0	0	9.25	Bacteria	Proteobacteria	Gammaproteobacteria	Burkholderiales	Sutterellaceae	Parasutterella
ZCML_adjusted	ASV251	0.0450779	-0.106694	0.19685	0.0773459	0.560148	1052	60.076	8	0	32	Bacteria	Bacteroidota	Bacteroidia	Bacteroidales	Marinifilaceae	Odoribacter
ZCML_adjusted	ASV283	0.0445616	-0.107062	0.196185	0.0772699	0.564267	1052	28.5171	0	0	14	Bacteria	Actinobacteriota	Coriobacteriia	Coriobacteriales	Eggerthellaceae	Senegalimassilia
ZCML_adjusted	ASV3537	0.010156	-0.0244598	0.0447718	0.0176409	0.564935	1052	1.3308	0	0	0	Bacteria	Firmicutes	Bacilli	Erysipelotrichales	Erysipelotrichaceae	Dielma
ZCEL_adjusted	ASV456	0.0434608	-0.104753	0.191675	0.0755325	0.565151	1052	22.8137	0	0	0	Bacteria	Firmicutes	Clostridia	Peptococcales	Peptococcaceae	Peptococcus
ZCEL_adjusted	ASV355	0.0465271	-0.112174	0.205228	0.080877	0.565225	1052	36.8821	0	0	18	Bacteria	Proteobacteria	Gammaproteobacteria	Burkholderiales	Sutterellaceae	Sutterella
ZCEL_adjusted	ASV50	-0.0413945	-0.184642	0.101853	0.0730014	0.570812	1052	89.5437	176.5	52	450	Bacteria	Firmicutes	Clostridia	Lachnospirales	Lachnospiraceae	Lachnospiraceae NK4A136 group
ZCEL_adjusted	ASV4217	-0.0110067	-0.0493786	0.0273652	0.019555	0.573654	1052	2.18631	0	0	0	Bacteria	Actinobacteriota	Coriobacteriia	Coriobacteriales	Atopobiaceae	Atopobium
ZCEL_adjusted	ASV1749	0.0146617	-0.0365501	0.0658736	0.0260985	0.574384	1052	3.23194	0	0	0	Bacteria	Actinobacteriota	Coriobacteriia	Coriobacteriales	Atopobiaceae	Coriobacteriaceae UCG-002
ZCML_adjusted	ASV1099	-0.0172458	-0.0781089	0.0436174	0.031017	0.578324	1052	3.51711	0	0	0	Bacteria	Firmicutes	Clostridia	Lachnospirales	Lachnospiraceae	Epulopiscium
ZCML_adjusted	ASV41	0.0533384	-0.135338	0.242014	0.0961528	0.579202	1052	75	100.5	4.5	235	Bacteria	Firmicutes	Clostridia	Lachnospirales	Lachnospiraceae	[Ruminococcus] gauvreauii group
ZMGH1_adjusted	ASV97	-0.043446	-0.198564	0.111672	0.0790508	0.582715	1052	84.6008	103	26	263.25	Bacteria	Firmicutes	Clostridia	Oscillospirales	Oscillospiraceae	NK4A214 group
ZCEL_adjusted	ASV1044	-0.0157424	-0.0719484	0.0404636	0.0286436	0.582715	1052	1.80608	0	0	0	Bacteria	Firmicutes	Clostridia	Lachnospirales	Lachnospiraceae	Anaerosporobacter
ZCEL_adjusted	ASV2005	0.0116082	-0.0301138	0.0533302	0.0212623	0.585215	1052	1.3308	0	0	0	Bacteria	Proteobacteria	Gammaproteobacteria	Enterobacterales	Succinivibrionaceae	Succinivibrio
ZMGH1_adjusted	ASV1784	0.025662	-0.0675092	0.118833	0.0474817	0.588996	1052	16.9202	0	0	0	Bacteria	Proteobacteria	Gammaproteobacteria	Burkholderiales	Oxalobacteraceae	Oxalobacter
ZMGH1_adjusted	ASV456	0.0409421	-0.107855	0.189739	0.0758295	0.589366	1052	22.8137	0	0	0	Bacteria	Firmicutes	Clostridia	Peptococcales	Peptococcaceae	Peptococcus
ZCEL_adjusted	ASV2872	-0.0115102	-0.053449	0.0304286	0.0213728	0.590317	1052	1.71103	0	0	0	Bacteria	Actinobacteriota	Actinobacteria	Bifidobacteriales	Bifidobacteriaceae	Alloscardovia
ZCML_adjusted	ASV89	0.051917	-0.137815	0.241649	0.0966909	0.591425	1052	54.8479	21	0	98.25	Bacteria	Firmicutes	Clostridia	Lachnospirales	Lachnospiraceae	CAG-56
ZMGH1_adjusted	ASV422	-0.0302767	-0.141141	0.0805879	0.0564987	0.592154	1052	10.4563	0	0	0	Bacteria	Firmicutes	Negativicutes	Acidaminococcales	Acidaminococcaceae	Acidaminococcus
ZCML_adjusted	ASV77	0.0256671	-0.0683451	0.119679	0.0479104	0.592258	1052	95.6274	79.5	36	156.25	Bacteria	Firmicutes	Clostridia	Oscillospirales	Ruminococcaceae	Incertae Sedis
ZCML_adjusted	ASV1204	0.0212596	-0.0570638	0.099583	0.0399151	0.59441	1052	5.98859	0	0	0	Bacteria	Firmicutes	Clostridia	Lachnospirales	Lachnospiraceae	FD2005
ZCEL_adjusted	ASV27	0.027223	-0.073097	0.127543	0.0511249	0.594507	1052	97.1483	302.5	139.75	677.25	Bacteria	Firmicutes	Clostridia	Lachnospirales	Lachnospiraceae	[Ruminococcus] torques group
ZCEL_adjusted	ASV1031	-0.0218156	-0.102434	0.0588023	0.0410844	0.595536	1052	7.88973	0	0	0	Bacteria	Firmicutes	Bacilli	Erysipelotrichales	Erysipelotrichaceae	[Clostridium] innocuum group
ZCML_adjusted	ASV860	0.0234891	-0.0637051	0.110683	0.0444358	0.59719	1052	6.27376	0	0	0	Bacteria	Firmicutes	Negativicutes	Veillonellales-Selenomonadales	Selenomonadaceae	Mitsuokella
ZCEL_adjusted	ASV481	-0.0239904	-0.113082	0.0651013	0.0454028	0.597341	1052	6.46388	0	0	0	Bacteria	Firmicutes	Bacilli	Erysipelotrichales	Erysipelotrichaceae	Solobacterium
ZCML_adjusted	ASV27	-0.0270586	-0.127774	0.0736565	0.0513263	0.598175	1052	97.1483	302.5	139.75	677.25	Bacteria	Firmicutes	Clostridia	Lachnospirales	Lachnospiraceae	[Ruminococcus] torques group
ZMGH1_adjusted	ASV26	-0.0387552	-0.185319	0.107809	0.0746918	0.603964	1052	90.5894	335	104.75	814.25	Bacteria	Firmicutes	Clostridia	Oscillospirales	Oscillospiraceae	UCG-002
ZMGH1_adjusted	ASV3333	0.0103714	-0.0289838	0.0497266	0.0200561	0.605184	1052	1.90114	0	0	0	Bacteria	Firmicutes	Clostridia	Lachnospirales	Lachnospiraceae	CHKCI001
ZCEL_adjusted	ASV2874	0.0143424	-0.0401347	0.0688196	0.0277626	0.605538	1052	4.37262	0	0	0	Bacteria	Firmicutes	Clostridia	Oscillospirales	Ruminococcaceae	Pygmaiobacter
ZCML_adjusted	ASV20	0.0250046	-0.0706007	0.12061	0.0487222	0.607916	1052	98.9544	1143.5	396.75	2518.75	Bacteria	Bacteroidota	Bacteroidia	Bacteroidales	Bacteroidaceae	Bacteroides
ZMGH1_adjusted	ASV414	-0.0233328	-0.113081	0.0664157	0.0457375	0.610058	1052	8.93536	0	0	0	Bacteria	Firmicutes	Bacilli	Lactobacillales	Lactobacillaceae	Latilactobacillus
ZCEL_adjusted	ASV13	-0.0270182	-0.130945	0.0769083	0.0529629	0.610065	1052	97.4335	466	195.75	931.5	Bacteria	Firmicutes	Clostridia	Lachnospirales	Lachnospiraceae	Anaerostipes
ZCEL_adjusted	ASV1481	0.0190584	-0.0542805	0.0923972	0.0373748	0.610212	1052	9.69582	0	0	0	Archaea	Euryarchaeota	Methanobacteria	Methanobacteriales	Methanobacteriaceae	Methanobrevibacter
ZCEL_adjusted	ASV5	-0.0254631	-0.123575	0.0726487	0.0499996	0.610674	1052	98.0989	1220	506.25	2536.5	Bacteria	Firmicutes	Clostridia	Oscillospirales	Ruminococcaceae	Faecalibacterium
ZCEL_adjusted	ASV378	-0.0371293	-0.180827	0.106568	0.073231	0.612251	1052	41.0646	0	0	13	Bacteria	Firmicutes	Clostridia	Oscillospirales	Ruminococcaceae	DTU089
ZMGH1_adjusted	ASV1991	0.0171808	-0.0497911	0.0841528	0.0341302	0.614796	1052	9.69582	0	0	0	Bacteria	Firmicutes	Clostridia	Oscillospirales	Ruminococcaceae	Anaerofilum
ZCEL_adjusted	ASV1128	-0.0161338	-0.0802215	0.047954	0.0326603	0.62142	1052	3.04183	0	0	0	Bacteria	Bacteroidota	Bacteroidia	Bacteroidales	Prevotellaceae	Prevotella
ZCEL_adjusted	ASV768	0.0308454	-0.0928565	0.154547	0.0630408	0.624737	1052	25.9506	0	0	4	Bacteria	Bacteroidota	Bacteroidia	Bacteroidales	Marinifilaceae	Butyricimonas
ZMGH1_adjusted	ASV181	-0.0419331	-0.211351	0.127485	0.0863386	0.627296	1052	65.8745	29	0	82	Bacteria	Firmicutes	Clostridia	Lachnospirales	Lachnospiraceae	Marvinbryantia
ZMGH1_adjusted	ASV921	-0.0191714	-0.097299	0.0589561	0.0398153	0.630256	1052	6.36882	0	0	0	Bacteria	Firmicutes	Clostridia	Lachnospirales	Lachnospiraceae	Oribacterium
ZMGH1_adjusted	ASV2152	0.0131261	-0.0406793	0.0669315	0.0274202	0.632251	1052	5.41825	0	0	0	Bacteria	Verrucomicrobiota	Lentisphaeria	Victivallales	Victivallaceae	Victivallis
ZCML_adjusted	ASV186	-0.0392663	-0.201574	0.123041	0.0827149	0.635087	1052	60.4563	16	0	51	Bacteria	Firmicutes	Clostridia	Oscillospirales	Oscillospiraceae	Intestinimonas
ZCML_adjusted	ASV7	0.0301788	-0.0950868	0.155444	0.0638377	0.636496	1052	94.3916	435	192.75	841.25	Bacteria	Firmicutes	Clostridia	Lachnospirales	Lachnospiraceae	Fusicatenibacter
ZCML_adjusted	ASV19	0.0488398	-0.155186	0.252866	0.103976	0.638651	1052	77.5665	192.5	12	601	Bacteria	Actinobacteriota	Actinobacteria	Bifidobacteriales	Bifidobacteriaceae	Bifidobacterium
ZCML_adjusted	ASV113	0.0411197	-0.134363	0.216603	0.0894295	0.645756	1052	63.5932	25	0	90	Bacteria	Firmicutes	Clostridia	Lachnospirales	Lachnospiraceae	[Eubacterium] xylanophilum group
ZMGH1_adjusted	ASV3701	-0.00907334	-0.0478283	0.0296816	0.0197503	0.646041	1052	1.9962	0	0	0	Bacteria	Bacteroidota	Bacteroidia	Bacteroidales	Marinifilaceae	Sanguibacteroides
ZCML_adjusted	ASV65	0.0418131	-0.137285	0.220911	0.0912715	0.646964	1052	77.9468	82.5	12	260	Bacteria	Firmicutes	Clostridia	Lachnospirales	Lachnospiraceae	[Eubacterium] eligens group
ZMGH1_adjusted	ASV93	-0.0314744	-0.167058	0.104109	0.069096	0.648832	1052	90.7795	143.5	48	318	Bacteria	Firmicutes	Clostridia	Lachnospirales	Lachnospiraceae	Lachnoclostridium
ZCEL_adjusted	ASV1268	0.0140588	-0.0469119	0.0750295	0.0310718	0.651032	1052	4.37262	0	0	0	Bacteria	Synergistota	Synergistia	Synergistales	Synergistaceae	Cloacibacillus
ZMGH1_adjusted	ASV1268	0.0141086	-0.0471007	0.0753179	0.0311934	0.651152	1052	4.37262	0	0	0	Bacteria	Synergistota	Synergistia	Synergistales	Synergistaceae	Cloacibacillus
ZCML_adjusted	ASV665	0.0306266	-0.104278	0.165531	0.0687496	0.656066	1052	22.8137	0	0	0	Bacteria	Actinobacteriota	Coriobacteriia	Coriobacteriales	Eggerthellaceae	Adlercreutzia
ZCML_adjusted	ASV1568	-0.0221987	-0.120172	0.0757744	0.0499289	0.656697	1052	19.2966	0	0	0	Bacteria	Firmicutes	Clostridia	Oscillospirales	Ruminococcaceae	Anaerotruncus
ZCEL_adjusted	ASV303	0.0366334	-0.125261	0.198528	0.0825043	0.657122	1052	29.943	0	0	17	Bacteria	Desulfobacterota	Desulfovibrionia	Desulfovibrionales	Desulfovibrionaceae	Desulfovibrio
ZMGH1_adjusted	ASV13	0.0235243	-0.0808122	0.127861	0.0531718	0.658277	1052	97.4335	466	195.75	931.5	Bacteria	Firmicutes	Clostridia	Lachnospirales	Lachnospiraceae	Anaerostipes
ZCEL_adjusted	ASV238	0.0375445	-0.129258	0.204347	0.0850056	0.658819	1052	46.8631	0	0	35.25	Bacteria	Firmicutes	Clostridia	Lachnospirales	Lachnospiraceae	Lachnospiraceae UCG-004
ZCML_adjusted	ASV1	-0.015123	-0.0827289	0.0524828	0.0344532	0.660793	1052	99.5247	2396.5	1302.75	4277.75	Bacteria	Firmicutes	Clostridia	Lachnospirales	Lachnospiraceae	Blautia
ZMGH1_adjusted	ASV936	-0.0313142	-0.171402	0.108774	0.0713915	0.661023	1052	47.8137	0	0	14	Bacteria	Firmicutes	Clostridia	Oscillospirales	Ruminococcaceae	Paludicola
ZMGH1_adjusted	ASV53	0.045451	-0.159163	0.250065	0.104275	0.663017	1052	36.9772	0	0	66	Bacteria	Firmicutes	Clostridia	Lachnospirales	Lachnospiraceae	[Eubacterium] ruminantium group
ZMGH1_adjusted	ASV104	0.0447653	-0.159001	0.248531	0.103843	0.666495	1052	38.8783	0	0	83.25	Bacteria	Firmicutes	Bacilli	Erysipelotrichales	Erysipelotrichaceae	Holdemanella
ZCML_adjusted	ASV1551	0.0198655	-0.070666	0.110397	0.0461365	0.666862	1052	9.03042	0	0	0	Bacteria	Actinobacteriota	Coriobacteriia	Coriobacteriales	Atopobiaceae	Olsenella
ZMGH1_adjusted	ASV27	-0.0217912	-0.122509	0.0789263	0.0513275	0.671251	1052	97.1483	302.5	139.75	677.25	Bacteria	Firmicutes	Clostridia	Lachnospirales	Lachnospiraceae	[Ruminococcus] torques group
ZCML_adjusted	ASV242	-0.0350078	-0.197956	0.12794	0.0830412	0.673425	1052	40.3992	0	0	21	Bacteria	Firmicutes	Clostridia	Lachnospirales	Lachnospiraceae	Lachnospiraceae UCG-010
ZMGH1_adjusted	ASV303	-0.0349104	-0.19744	0.127619	0.0828279	0.673491	1052	29.943	0	0	17	Bacteria	Desulfobacterota	Desulfovibrionia	Desulfovibrionales	Desulfovibrionaceae	Desulfovibrio
ZCML_adjusted	ASV1553	-0.0154412	-0.0874771	0.0565948	0.0367108	0.674123	1052	7.03422	0	0	0	Bacteria	Actinobacteriota	Coriobacteriia	Coriobacteriales	Eggerthellaceae	Gordonibacter
ZCEL_adjusted	ASV46	-0.0390599	-0.222372	0.144252	0.0934191	0.67595	1052	72.1483	35	0	160.25	Bacteria	Firmicutes	Clostridia	Oscillospirales	Ruminococcaceae	[Eubacterium] siraeum group
ZCML_adjusted	ASV47	-0.036271	-0.207845	0.135303	0.0874375	0.678358	1052	17.4905	0	0	0	Bacteria	Firmicutes	Clostridia	Lachnospirales	Lachnospiraceae	Butyrivibrio
ZCEL_adjusted	ASV1991	0.0140198	-0.0526938	0.0807334	0.0339985	0.680157	1052	9.69582	0	0	0	Bacteria	Firmicutes	Clostridia	Oscillospirales	Ruminococcaceae	Anaerofilum
ZCML_adjusted	ASV253	0.0206188	-0.0776371	0.118875	0.050073	0.68059	1052	9.31559	0	0	0	Bacteria	Firmicutes	Bacilli	Acholeplasmatales	Acholeplasmataceae	Anaeroplasma
ZCEL_adjusted	ASV414	-0.0185682	-0.107971	0.0708345	0.0455613	0.683693	1052	8.93536	0	0	0	Bacteria	Firmicutes	Bacilli	Lactobacillales	Lactobacillaceae	Latilactobacillus
ZMGH1_adjusted	ASV58	-0.0383859	-0.223303	0.146531	0.0942372	0.683848	1052	71.8631	48.5	0	168	Bacteria	Firmicutes	Bacilli	Erysipelotrichales	Erysipelatoclostridiaceae	Erysipelotrichaceae UCG-003
ZCEL_adjusted	ASV422	-0.0227537	-0.133193	0.0876853	0.0562818	0.686088	1052	10.4563	0	0	0	Bacteria	Firmicutes	Negativicutes	Acidaminococcales	Acidaminococcaceae	Acidaminococcus
ZCEL_adjusted	ASV706	-0.0280333	-0.164377	0.10831	0.0694831	0.686697	1052	29.8479	0	0	11	Bacteria	Firmicutes	Clostridia	Oscillospirales	Oscillospiraceae	Oscillospira
ZMGH1_adjusted	ASV1176	-0.0138198	-0.0811977	0.053558	0.034337	0.687416	1052	5.89354	0	0	0	Bacteria	Firmicutes	Clostridia	Peptostreptococcales-Tissierellales	Anaerovoracaceae	[Eubacterium] nodatum group
ZMGH1_adjusted	ASV3648	-0.00839164	-0.0499602	0.0331769	0.0211841	0.692091	1052	2.75665	0	0	0	Bacteria	Firmicutes	Clostridia	Lachnospirales	Lachnospiraceae	GCA-900066755
ZCML_adjusted	ASV200	-0.0220795	-0.132054	0.0878952	0.0560451	0.693693	1052	91.1597	45	17	95	Bacteria	Firmicutes	Clostridia	Peptostreptococcales-Tissierellales	Anaerovoracaceae	Family XIII AD3011 group
ZMGH1_adjusted	ASV47	0.0341289	-0.137443	0.205701	0.0874364	0.696374	1052	17.4905	0	0	0	Bacteria	Firmicutes	Clostridia	Lachnospirales	Lachnospiraceae	Butyrivibrio
ZMGH1_adjusted	ASV2651	0.00862125	-0.0351219	0.0523644	0.0222923	0.699031	1052	1.90114	0	0	0	Bacteria	Firmicutes	Clostridia	Lachnospirales	Lachnospiraceae	Lactonifactor
ZMGH1_adjusted	ASV65	-0.0351639	-0.214263	0.143935	0.0912721	0.70012	1052	77.9468	82.5	12	260	Bacteria	Firmicutes	Clostridia	Lachnospirales	Lachnospiraceae	[Eubacterium] eligens group
ZCEL_adjusted	ASV1139	-0.0120787	-0.0755884	0.051431	0.0323657	0.709081	1052	4.46768	0	0	0	Bacteria	Firmicutes	Clostridia	Lachnospirales	Lachnospiraceae	Lachnospiraceae UCG-009
ZMGH1_adjusted	ASV135	0.028765	-0.123813	0.181343	0.0777567	0.711505	1052	76.9962	41	8	93	Bacteria	Firmicutes	Clostridia	Lachnospirales	Lachnospiraceae	Lachnospiraceae FCS020 group
ZCML_adjusted	ASV1031	0.0151681	-0.0657729	0.0961091	0.041249	0.713157	1052	7.88973	0	0	0	Bacteria	Firmicutes	Bacilli	Erysipelotrichales	Erysipelotrichaceae	[Clostridium] innocuum group
ZCML_adjusted	ASV4217	-0.0071031	-0.0456295	0.0314233	0.0196338	0.71759	1052	2.18631	0	0	0	Bacteria	Actinobacteriota	Coriobacteriia	Coriobacteriales	Atopobiaceae	Atopobium
ZCEL_adjusted	ASV3559	0.00768631	-0.0340411	0.0494137	0.0212651	0.717835	1052	3.89734	0	0	0	Bacteria	Firmicutes	Clostridia	Oscillospirales	Ethanoligenenaceae	Acetanaerobacterium
ZCEL_adjusted	ASV621	-0.0205979	-0.132847	0.0916516	0.0572045	0.718864	1052	13.9734	0	0	0	Bacteria	Firmicutes	Clostridia	Lachnospirales	Lachnospiraceae	Eisenbergiella
ZCEL_adjusted	ASV860	0.0158745	-0.0709842	0.102733	0.0442648	0.719948	1052	6.27376	0	0	0	Bacteria	Firmicutes	Negativicutes	Veillonellales-Selenomonadales	Selenomonadaceae	Mitsuokella
ZMGH1_adjusted	ASV1553	0.012977	-0.0590591	0.085013	0.0367109	0.723792	1052	7.03422	0	0	0	Bacteria	Actinobacteriota	Coriobacteriia	Coriobacteriales	Eggerthellaceae	Gordonibacter
ZCML_adjusted	ASV1991	-0.0118415	-0.0788193	0.0551363	0.0341331	0.728721	1052	9.69582	0	0	0	Bacteria	Firmicutes	Clostridia	Oscillospirales	Ruminococcaceae	Anaerofilum
ZCML_adjusted	ASV2872	-0.00743291	-0.0495402	0.0346744	0.0214587	0.729125	1052	1.71103	0	0	0	Bacteria	Actinobacteriota	Actinobacteria	Bifidobacteriales	Bifidobacteriaceae	Alloscardovia
ZMGH1_adjusted	ASV30	-0.039274	-0.262241	0.183693	0.113628	0.729686	1052	31.749	0	0	84.25	Bacteria	Firmicutes	Clostridia	Oscillospirales	Ruminococcaceae	CAG-352
ZMGH1_adjusted	ASV341	0.00761257	-0.0360498	0.0512749	0.0222511	0.732329	1052	0.95057	0	0	0	Bacteria	Bacteroidota	Bacteroidia	Bacteroidales	Rikenellaceae	Rikenellaceae RC9 gut group
ZMGH1_adjusted	ASV1568	-0.0170715	-0.115046	0.0809032	0.0499297	0.732488	1052	19.2966	0	0	0	Bacteria	Firmicutes	Clostridia	Oscillospirales	Ruminococcaceae	Anaerotruncus
ZMGH1_adjusted	ASV1099	-0.0105177	-0.0713851	0.0503498	0.0310192	0.734626	1052	3.51711	0	0	0	Bacteria	Firmicutes	Clostridia	Lachnospirales	Lachnospiraceae	Epulopiscium
ZMGH1_adjusted	ASV2894	0.00852874	-0.0409058	0.0579632	0.0251927	0.735025	1052	6.46388	0	0	0	Bacteria	Firmicutes	Clostridia	Oscillospirales	Oscillospiraceae	Papillibacter
ZCML_adjusted	ASV46	-0.0316889	-0.215728	0.15235	0.0937895	0.735528	1052	72.1483	35	0	160.25	Bacteria	Firmicutes	Clostridia	Oscillospirales	Ruminococcaceae	[Eubacterium] siraeum group
ZMGH1_adjusted	ASV186	-0.0279387	-0.190251	0.134374	0.0827175	0.735612	1052	60.4563	16	0	51	Bacteria	Firmicutes	Clostridia	Oscillospirales	Oscillospiraceae	Intestinimonas
ZCEL_adjusted	ASV207	0.0260993	-0.125992	0.17819	0.0775084	0.736389	1052	54.8479	8	0	30	Bacteria	Firmicutes	Clostridia	Oscillospirales	Oscillospiraceae	Oscillibacter
ZCML_adjusted	ASV207	0.0261333	-0.126556	0.178823	0.0778135	0.737055	1052	54.8479	8	0	30	Bacteria	Firmicutes	Clostridia	Oscillospirales	Oscillospiraceae	Oscillibacter
ZCML_adjusted	ASV1929	-0.0108721	-0.074557	0.0528128	0.032455	0.7377	1052	4.65779	0	0	0	Bacteria	Firmicutes	Clostridia	Lachnospirales	Lachnospiraceae	Lachnospiraceae NK4B4 group
ZCML_adjusted	ASV4620	0.0061142	-0.0307391	0.0429675	0.0187811	0.74483	1052	1.61597	0	0	0	Bacteria	Firmicutes	Clostridia	Peptostreptococcales-Tissierellales	Family XI	Finegoldia
ZMGH1_adjusted	ASV1015	-0.0138421	-0.0978236	0.0701394	0.0427985	0.746439	1052	9.79087	0	0	0	Bacteria	Firmicutes	Clostridia	Peptostreptococcales-Tissierellales	Anaerovoracaceae	Mogibacterium
ZMGH1_adjusted	ASV712	-0.0182758	-0.129292	0.0927399	0.0565757	0.746735	1052	21.3878	0	0	0	Bacteria	Firmicutes	Clostridia	Peptostreptococcales-Tissierellales	Anaerovoracaceae	[Eubacterium] brachy group
ZCML_adjusted	ASV40	-0.0163189	-0.11616	0.0835226	0.050881	0.748482	1052	96.673	352	169.5	657.5	Bacteria	Firmicutes	Clostridia	Lachnospirales	Lachnospiraceae	Roseburia
ZCEL_adjusted	ASV1195	0.0146345	-0.0754487	0.104718	0.0459081	0.749958	1052	15.9696	0	0	0	Bacteria	Firmicutes	Clostridia	Oscillospirales	Oscillospiraceae	UCG-007
ZMGH1_adjusted	ASV33	0.0347855	-0.179449	0.24902	0.109178	0.750084	1052	49.9049	0	0	145.25	Bacteria	Firmicutes	Clostridia	Peptostreptococcales-Tissierellales	Peptostreptococcaceae	Intestinibacter
ZCML_adjusted	ASV538	0.0192565	-0.0994409	0.137954	0.0604904	0.750291	1052	27.0913	0	0	4	Bacteria	Desulfobacterota	Desulfovibrionia	Desulfovibrionales	Desulfovibrionaceae	Bilophila
ZCML_adjusted	ASV358	-0.0101474	-0.0729534	0.0526585	0.0320071	0.751279	1052	3.80228	0	0	0	Bacteria	Proteobacteria	Gammaproteobacteria	Pseudomonadales	Pseudomonadaceae	Pseudomonas
ZCEL_adjusted	ASV358	0.0100451	-0.0525146	0.0726049	0.0318816	0.752767	1052	3.80228	0	0	0	Bacteria	Proteobacteria	Gammaproteobacteria	Pseudomonadales	Pseudomonadaceae	Pseudomonas
ZMGH1_adjusted	ASV1044	0.00905373	-0.0473777	0.0654852	0.0287585	0.752962	1052	1.80608	0	0	0	Bacteria	Firmicutes	Clostridia	Lachnospirales	Lachnospiraceae	Anaerosporobacter
ZCEL_adjusted	ASV1844	0.00675921	-0.0360814	0.0495998	0.0218324	0.75693	1052	1.23574	0	0	0	Bacteria	Firmicutes	Bacilli	Lactobacillales	Lactobacillaceae	Weissella
ZMGH1_adjusted	ASV538	0.0180892	-0.100606	0.136785	0.0604894	0.764963	1052	27.0913	0	0	4	Bacteria	Desulfobacterota	Desulfovibrionia	Desulfovibrionales	Desulfovibrionaceae	Bilophila
ZCML_adjusted	ASV50	0.0218407	-0.121986	0.165668	0.0732969	0.765782	1052	89.5437	176.5	52	450	Bacteria	Firmicutes	Clostridia	Lachnospirales	Lachnospiraceae	Lachnospiraceae NK4A136 group
ZCML_adjusted	ASV712	-0.0168034	-0.127823	0.0942158	0.0565774	0.766528	1052	21.3878	0	0	0	Bacteria	Firmicutes	Clostridia	Peptostreptococcales-Tissierellales	Anaerovoracaceae	[Eubacterium] brachy group
ZCEL_adjusted	ASV589	0.0127227	-0.0733895	0.098835	0.0438844	0.771939	1052	4.65779	0	0	0	Bacteria	Firmicutes	Negativicutes	Veillonellales-Selenomonadales	Veillonellaceae	Megasphaera
ZCML_adjusted	ASV3559	0.00611572	-0.0357769	0.0480083	0.0213493	0.774583	1052	3.89734	0	0	0	Bacteria	Firmicutes	Clostridia	Oscillospirales	Ethanoligenenaceae	Acetanaerobacterium
ZMGH1_adjusted	ASV1929	-0.00914352	-0.0728279	0.0545409	0.0324548	0.778206	1052	4.65779	0	0	0	Bacteria	Firmicutes	Clostridia	Lachnospirales	Lachnospiraceae	Lachnospiraceae NK4B4 group
ZCML_adjusted	ASV35	-0.0212684	-0.169569	0.127032	0.0755767	0.778448	1052	90.3992	261.5	51.75	737.5	Bacteria	Firmicutes	Clostridia	Christensenellales	Christensenellaceae	Christensenellaceae R-7 group
ZMGH1_adjusted	ASV490	-0.0144407	-0.118784	0.0899023	0.0531751	0.786008	1052	11.7871	0	0	0	Bacteria	Firmicutes	Clostridia	Lachnospirales	Lachnospiraceae	UC5-1-2E3
ZMGH1_adjusted	ASV1368	-0.0122055	-0.102081	0.0776702	0.0458023	0.789921	1052	18.8213	0	0	0	Bacteria	Firmicutes	Clostridia	Oscillospirales	Ruminococcaceae	Candidatus Soleaferrea
ZMGH1_adjusted	ASV3	-0.0315514	-0.264723	0.20162	0.118828	0.790662	1052	68.346	68.5	0	599	Bacteria	Proteobacteria	Gammaproteobacteria	Enterobacterales	Enterobacteriaceae	Escherichia-Shigella
ZMGH1_adjusted	ASV253	0.0132537	-0.0850046	0.111512	0.0500743	0.791308	1052	9.31559	0	0	0	Bacteria	Firmicutes	Bacilli	Acholeplasmatales	Acholeplasmataceae	Anaeroplasma
ZCML_adjusted	ASV706	0.0183826	-0.118503	0.155269	0.0697597	0.792207	1052	29.8479	0	0	11	Bacteria	Firmicutes	Clostridia	Oscillospirales	Oscillospiraceae	Oscillospira
ZMGH1_adjusted	ASV19	0.0266351	-0.177402	0.230672	0.103981	0.797883	1052	77.5665	192.5	12	601	Bacteria	Actinobacteriota	Actinobacteria	Bifidobacteriales	Bifidobacteriaceae	Bifidobacterium
ZCEL_adjusted	ASV40	-0.0129111	-0.112363	0.0865407	0.0506825	0.798971	1052	96.673	352	169.5	657.5	Bacteria	Firmicutes	Clostridia	Lachnospirales	Lachnospiraceae	Roseburia
ZMGH1_adjusted	ASV76	0.024619	-0.165522	0.21476	0.0968995	0.799494	1052	49.4297	0	0	57.25	Bacteria	Verrucomicrobiota	Verrucomicrobiae	Verrucomicrobiales	Akkermansiaceae	Akkermansia
ZMGH1_adjusted	ASV785	-0.0106682	-0.09377	0.0724336	0.0423502	0.801165	1052	7.79468	0	0	0	Bacteria	Firmicutes	Bacilli	Erysipelotrichales	Erysipelatoclostridiaceae	Coprobacillus
ZCEL_adjusted	ASV3648	0.00523761	-0.0361708	0.046646	0.0211025	0.80403	1052	2.75665	0	0	0	Bacteria	Firmicutes	Clostridia	Lachnospirales	Lachnospiraceae	GCA-900066755
ZMGH1_adjusted	ASV16	-0.0232696	-0.214268	0.167728	0.0973361	0.811103	1052	78.0418	110	11	344.25	Bacteria	Firmicutes	Clostridia	Peptostreptococcales-Tissierellales	Peptostreptococcaceae	Romboutsia
ZCEL_adjusted	ASV2152	-0.00652361	-0.0601237	0.0470765	0.0273156	0.81129	1052	5.41825	0	0	0	Bacteria	Verrucomicrobiota	Lentisphaeria	Victivallales	Victivallaceae	Victivallis
ZCEL_adjusted	ASV576	0.0123706	-0.0901971	0.114938	0.0522704	0.812963	1052	10.1711	0	0	0	Bacteria	Actinobacteriota	Coriobacteriia	Coriobacteriales	Eggerthellaceae	Eggerthella
ZMGH1_adjusted	ASV113	0.0211281	-0.154364	0.19662	0.0894341	0.813291	1052	63.5932	25	0	90	Bacteria	Firmicutes	Clostridia	Lachnospirales	Lachnospiraceae	[Eubacterium] xylanophilum group
ZCML_adjusted	ASV456	0.017721	-0.131096	0.166538	0.0758399	0.815292	1052	22.8137	0	0	0	Bacteria	Firmicutes	Clostridia	Peptococcales	Peptococcaceae	Peptococcus
ZMGH1_adjusted	ASV813	0.0138006	-0.104063	0.131664	0.0600655	0.818324	1052	21.3878	0	0	0	Bacteria	Firmicutes	Clostridia	Oscillospirales	Ruminococcaceae	Fournierella
ZMGH1_adjusted	ASV1031	-0.00943722	-0.0903796	0.0715052	0.0412497	0.819083	1052	7.88973	0	0	0	Bacteria	Firmicutes	Bacilli	Erysipelotrichales	Erysipelotrichaceae	[Clostridium] innocuum group
ZMGH1_adjusted	ASV1762	-0.0063894	-0.0615121	0.0487333	0.0280915	0.820119	1052	3.13688	0	0	0	Bacteria	Firmicutes	Clostridia	Oscillospirales	Hungateiclostridiaceae	Ruminiclostridium
ZMGH1_adjusted	ASV3567	0.00485946	-0.037065	0.0467839	0.0213655	0.820123	1052	2.09125	0	0	0	Bacteria	Firmicutes	Bacilli	Erysipelotrichales	Erysipelotrichaceae	Faecalicoccus
ZCEL_adjusted	ASV1099	-0.00697195	-0.067604	0.0536601	0.0308992	0.82153	1052	3.51711	0	0	0	Bacteria	Firmicutes	Clostridia	Lachnospirales	Lachnospiraceae	Epulopiscium
ZCEL_adjusted	ASV1762	-0.00629097	-0.0611988	0.0486169	0.0279821	0.822162	1052	3.13688	0	0	0	Bacteria	Firmicutes	Clostridia	Oscillospirales	Hungateiclostridiaceae	Ruminiclostridium
ZMGH1_adjusted	ASV80	-0.0189473	-0.184465	0.146571	0.0843511	0.822316	1052	79.1825	60	12	176.5	Bacteria	Firmicutes	Clostridia	Lachnospirales	Lachnospiraceae	Lachnospira
ZMGH1_adjusted	ASV417	0.0126078	-0.0983319	0.123548	0.0565369	0.823579	1052	16.1597	0	0	0	Bacteria	Actinobacteriota	Coriobacteriia	Coriobacteriales	Eggerthellaceae	Slackia
ZCEL_adjusted	ASV208	0.0168894	-0.132218	0.165997	0.0759879	0.824152	1052	21.5779	0	0	0	Bacteria	Firmicutes	Bacilli	Lactobacillales	Lactobacillaceae	Lactobacillus
ZCML_adjusted	ASV303	-0.0184011	-0.180944	0.144142	0.0828349	0.824247	1052	29.943	0	0	17	Bacteria	Desulfobacterota	Desulfovibrionia	Desulfovibrionales	Desulfovibrionaceae	Desulfovibrio
ZMGH1_adjusted	ASV242	-0.0184087	-0.181363	0.144545	0.0830445	0.824612	1052	40.3992	0	0	21	Bacteria	Firmicutes	Clostridia	Lachnospirales	Lachnospiraceae	Lachnospiraceae UCG-010
ZMGH1_adjusted	ASV83	0.0155412	-0.122228	0.15331	0.0702095	0.824859	1052	87.4525	82.5	32	177	Bacteria	Firmicutes	Clostridia	Oscillospirales	Butyricicoccaceae	Butyricicoccus
ZCEL_adjusted	ASV2061	-0.00815675	-0.0805521	0.0642386	0.036894	0.825069	1052	9.22053	0	0	0	Bacteria	Firmicutes	Clostridia	Oscillospirales	Ruminococcaceae	Caproiciproducens
ZMGH1_adjusted	ASV1844	0.00480197	-0.0382073	0.0478112	0.0219183	0.826627	1052	1.23574	0	0	0	Bacteria	Firmicutes	Bacilli	Lactobacillales	Lactobacillaceae	Weissella
ZMGH1_adjusted	ASV2874	-0.00607579	-0.0607719	0.0486204	0.0278742	0.827494	1052	4.37262	0	0	0	Bacteria	Firmicutes	Clostridia	Oscillospirales	Ruminococcaceae	Pygmaiobacter
ZCEL_adjusted	ASV83	0.0150021	-0.12223	0.152234	0.0699359	0.83019	1052	87.4525	82.5	32	177	Bacteria	Firmicutes	Clostridia	Oscillospirales	Butyricicoccaceae	Butyricicoccus
ZCEL_adjusted	ASV503	-0.0118284	-0.120963	0.0973063	0.0556171	0.831621	1052	10.4563	0	0	0	Bacteria	Firmicutes	Clostridia	Lachnospirales	Lachnospiraceae	Tuzzerella
ZMGH1_adjusted	ASV23	-0.0151045	-0.155143	0.124934	0.071366	0.832423	1052	93.251	578	222.75	1222.25	Bacteria	Firmicutes	Clostridia	Oscillospirales	Ruminococcaceae	Ruminococcus
ZCEL_adjusted	ASV151	-0.0163806	-0.169893	0.137132	0.0782327	0.83419	1052	64.5437	12	0	30	Bacteria	Firmicutes	Clostridia	Oscillospirales	Ruminococcaceae	UBA1819
ZCML_adjusted	ASV813	-0.0125398	-0.130407	0.105327	0.0600671	0.834674	1052	21.3878	0	0	0	Bacteria	Firmicutes	Clostridia	Oscillospirales	Ruminococcaceae	Fournierella
ZMGH1_adjusted	ASV3559	0.00444883	-0.0374436	0.0463413	0.0213492	0.83497	1052	3.89734	0	0	0	Bacteria	Firmicutes	Clostridia	Oscillospirales	Ethanoligenenaceae	Acetanaerobacterium
ZCML_adjusted	ASV1749	-0.00541037	-0.0568305	0.0460098	0.0262047	0.836467	1052	3.23194	0	0	0	Bacteria	Actinobacteriota	Coriobacteriia	Coriobacteriales	Atopobiaceae	Coriobacteriaceae UCG-002
ZCML_adjusted	ASV1630	-0.00427138	-0.0448848	0.036342	0.0206973	0.83654	1052	1.14068	0	0	0	Bacteria	Bacteroidota	Bacteroidia	Bacteroidales	Rikenellaceae	Rikenella
ZCEL_adjusted	ASV490	0.0107845	-0.0931534	0.114722	0.0529687	0.838705	1052	11.7871	0	0	0	Bacteria	Firmicutes	Clostridia	Lachnospirales	Lachnospiraceae	UC5-1-2E3
ZMGH1_adjusted	ASV146	-0.0185578	-0.197878	0.160763	0.091385	0.839118	1052	46.8631	0	0	40	Bacteria	Firmicutes	Bacilli	Erysipelotrichales	Erysipelotrichaceae	Turicibacter
ZCML_adjusted	ASV159	0.0168369	-0.149158	0.182832	0.0845942	0.842277	1052	30.7985	0	0	22	Bacteria	Actinobacteriota	Coriobacteriia	Coriobacteriales	Coriobacteriaceae	Collinsella
ZCEL_adjusted	ASV3701	0.00379465	-0.0348125	0.0424018	0.0196749	0.8471	1052	1.9962	0	0	0	Bacteria	Bacteroidota	Bacteroidia	Bacteroidales	Marinifilaceae	Sanguibacteroides
ZCEL_adjusted	ASV1553	0.00704279	-0.0647155	0.0788011	0.0365694	0.84732	1052	7.03422	0	0	0	Bacteria	Actinobacteriota	Coriobacteriia	Coriobacteriales	Eggerthellaceae	Gordonibacter
ZMGH1_adjusted	ASV768	-0.0121581	-0.136356	0.11204	0.0632937	0.847709	1052	25.9506	0	0	4	Bacteria	Bacteroidota	Bacteroidia	Bacteroidales	Marinifilaceae	Butyricimonas
ZMGH1_adjusted	ASV860	-0.00831093	-0.0955135	0.0788916	0.04444	0.851686	1052	6.27376	0	0	0	Bacteria	Firmicutes	Negativicutes	Veillonellales-Selenomonadales	Selenomonadaceae	Mitsuokella
ZCML_adjusted	ASV201	0.0156338	-0.150103	0.181371	0.0844628	0.853189	1052	40.8745	0	0	34.25	Bacteria	Firmicutes	Clostridia	Lachnospirales	Lachnospiraceae	Lachnospiraceae UCG-001
ZCML_adjusted	ASV726	0.00992608	-0.0957754	0.115628	0.0538674	0.853839	1052	22.4335	0	0	0	Bacteria	Bacteroidota	Bacteroidia	Bacteroidales	Barnesiellaceae	Coprobacter
ZCML_adjusted	ASV2152	0.00500242	-0.0488093	0.0588141	0.0274234	0.855293	1052	5.41825	0	0	0	Bacteria	Verrucomicrobiota	Lentisphaeria	Victivallales	Victivallaceae	Victivallis
ZCEL_adjusted	ASV2894	0.0045422	-0.0447015	0.053786	0.0250955	0.856406	1052	6.46388	0	0	0	Bacteria	Firmicutes	Clostridia	Oscillospirales	Oscillospiraceae	Papillibacter
ZMGH1_adjusted	ASV358	0.00575997	-0.0570466	0.0685666	0.0320074	0.857221	1052	3.80228	0	0	0	Bacteria	Proteobacteria	Gammaproteobacteria	Pseudomonadales	Pseudomonadaceae	Pseudomonas
ZCEL_adjusted	ASV1397	-0.0047669	-0.0573095	0.0477757	0.0267767	0.858739	1052	2.09125	0	0	0	Bacteria	Firmicutes	Bacilli	Lactobacillales	Lactobacillaceae	Lactiplantibacillus
ZCML_adjusted	ASV542	0.0117055	-0.11895	0.142361	0.0665842	0.860486	1052	15.019	0	0	0	Bacteria	Firmicutes	Clostridia	Lachnospirales	Lachnospiraceae	Sellimonas
ZMGH1_adjusted	ASV20	0.0082287	-0.0873853	0.103843	0.0487266	0.865928	1052	98.9544	1143.5	396.75	2518.75	Bacteria	Bacteroidota	Bacteroidia	Bacteroidales	Bacteroidaceae	Bacteroides
ZMGH1_adjusted	ASV2119	0.00577382	-0.0625261	0.0740737	0.0348069	0.868283	1052	9.5057	0	0	0	Bacteria	Firmicutes	Clostridia	Christensenellales	Christensenellaceae	Christensenella
ZCEL_adjusted	ASV1784	-0.00774221	-0.100562	0.0850776	0.0473027	0.87002	1052	16.9202	0	0	0	Bacteria	Proteobacteria	Gammaproteobacteria	Burkholderiales	Oxalobacteraceae	Oxalobacter
ZCEL_adjusted	ASV19	-0.0169235	-0.220169	0.186322	0.103578	0.870244	1052	77.5665	192.5	12	601	Bacteria	Actinobacteriota	Actinobacteria	Bifidobacteriales	Bifidobacteriaceae	Bifidobacterium
ZCML_adjusted	ASV94	-0.0117859	-0.15344	0.129868	0.0721897	0.870343	1052	86.1217	72	20	155.25	Bacteria	Firmicutes	Clostridia	Lachnospirales	Lachnospiraceae	[Eubacterium] ventriosum group
ZCML_adjusted	ASV264	0.00959579	-0.106094	0.125286	0.0589577	0.870741	1052	7.22433	0	0	0	Bacteria	Bacteroidota	Bacteroidia	Bacteroidales	Prevotellaceae	Prevotellaceae NK3B31 group
ZMGH1_adjusted	ASV207	0.0124929	-0.1402	0.165186	0.077815	0.872482	1052	54.8479	8	0	30	Bacteria	Firmicutes	Clostridia	Oscillospirales	Oscillospiraceae	Oscillibacter
ZMGH1_adjusted	ASV1397	0.00418884	-0.0485595	0.0569372	0.0268815	0.8762	1052	2.09125	0	0	0	Bacteria	Firmicutes	Bacilli	Lactobacillales	Lactobacillaceae	Lactiplantibacillus
ZMGH1_adjusted	ASV201	-0.0130478	-0.178782	0.152687	0.0844613	0.87726	1052	40.8745	0	0	34.25	Bacteria	Firmicutes	Clostridia	Lachnospirales	Lachnospiraceae	Lachnospiraceae UCG-001
ZCML_adjusted	ASV294	0.0100719	-0.118783	0.138927	0.0656668	0.878129	1052	11.7871	0	0	0	Bacteria	Bacteroidota	Bacteroidia	Bacteroidales	Prevotellaceae	Alloprevotella
ZCEL_adjusted	ASV715	0.00406381	-0.0485498	0.0566774	0.0268129	0.879562	1052	1.52091	0	0	0	Bacteria	Proteobacteria	Gammaproteobacteria	Enterobacterales	Hafniaceae	Hafnia-Obesumbacterium
ZCML_adjusted	ASV102	-0.0156906	-0.220562	0.189181	0.104406	0.88057	1052	43.6312	0	0	100.25	Bacteria	Firmicutes	Negativicutes	Acidaminococcales	Acidaminococcaceae	Phascolarctobacterium
ZMGH1_adjusted	ASV264	0.00878363	-0.106904	0.124471	0.0589564	0.881594	1052	7.22433	0	0	0	Bacteria	Bacteroidota	Bacteroidia	Bacteroidales	Prevotellaceae	Prevotellaceae NK3B31 group
ZCML_adjusted	ASV39	0.0109819	-0.135084	0.157048	0.0744378	0.882741	1052	86.5019	118	38.75	242.25	Bacteria	Firmicutes	Clostridia	Lachnospirales	Lachnospiraceae	Lachnospiraceae ND3007 group
ZCEL_adjusted	ASV253	0.00735728	-0.0905203	0.105235	0.0498802	0.882767	1052	9.31559	0	0	0	Bacteria	Firmicutes	Bacilli	Acholeplasmatales	Acholeplasmataceae	Anaeroplasma
ZCEL_adjusted	ASV2211	0.00564178	-0.0703196	0.0816031	0.0387113	0.884155	1052	7.98479	0	0	0	Bacteria	Firmicutes	Negativicutes	Veillonellales-Selenomonadales	Veillonellaceae	Allisonella
ZCML_adjusted	ASV83	-0.00958524	-0.147359	0.128189	0.0702121	0.891438	1052	87.4525	82.5	32	177	Bacteria	Firmicutes	Clostridia	Oscillospirales	Butyricicoccaceae	Butyricicoccus
ZCEL_adjusted	ASV102	-0.0141235	-0.218192	0.189945	0.103997	0.892001	1052	43.6312	0	0	100.25	Bacteria	Firmicutes	Negativicutes	Acidaminococcales	Acidaminococcaceae	Phascolarctobacterium
ZCEL_adjusted	ASV2651	0.0030145	-0.0405609	0.0465899	0.0222068	0.892048	1052	1.90114	0	0	0	Bacteria	Firmicutes	Clostridia	Lachnospirales	Lachnospiraceae	Lactonifactor
ZMGH1_adjusted	ASV251	0.0102979	-0.141494	0.16209	0.0773561	0.894122	1052	60.076	8	0	32	Bacteria	Bacteroidota	Bacteroidia	Bacteroidales	Marinifilaceae	Odoribacter
ZMGH1_adjusted	ASV6	-0.00713177	-0.115382	0.101119	0.0551664	0.897163	1052	96.673	700	330.75	1266.25	Bacteria	Firmicutes	Clostridia	Lachnospirales	Lachnospiraceae	[Eubacterium] hallii group
ZMGH1_adjusted	ASV8	-0.00656901	-0.113492	0.100354	0.0544902	0.904068	1052	96.673	653.5	319.75	1284.75	Bacteria	Firmicutes	Clostridia	Oscillospirales	Ruminococcaceae	Subdoligranulum
ZCEL_adjusted	ASV135	0.00916977	-0.142823	0.161162	0.0774582	0.905787	1052	76.9962	41	8	93	Bacteria	Firmicutes	Clostridia	Lachnospirales	Lachnospiraceae	Lachnospiraceae FCS020 group
ZCEL_adjusted	ASV640	-0.00359517	-0.0669534	0.0597631	0.0322885	0.911364	1052	2.6616	0	0	0	Bacteria	Firmicutes	Clostridia	Lachnospirales	Lachnospiraceae	Lachnospiraceae UCG-007
ZCML_adjusted	ASV166	-0.00820571	-0.153816	0.137405	0.0742057	0.91197	1052	13.308	0	0	0	Bacteria	Firmicutes	Bacilli	Erysipelotrichales	Erysipelatoclostridiaceae	Catenibacterium
ZCML_adjusted	ASV1397	-0.00293447	-0.0556844	0.0498154	0.0268823	0.913097	1052	2.09125	0	0	0	Bacteria	Firmicutes	Bacilli	Lactobacillales	Lactobacillaceae	Lactiplantibacillus
ZMGH1_adjusted	ASV159	-0.00912693	-0.17512	0.156867	0.0845934	0.914102	1052	30.7985	0	0	22	Bacteria	Actinobacteriota	Coriobacteriia	Coriobacteriales	Coriobacteriaceae	Collinsella
ZCEL_adjusted	ASV429	-0.00635168	-0.122312	0.109609	0.0590957	0.914428	1052	16.8251	0	0	0	Bacteria	Proteobacteria	Gammaproteobacteria	Enterobacterales	Pasteurellaceae	Haemophilus
ZCML_adjusted	ASV3701	-0.00211463	-0.0408742	0.036645	0.0197526	0.914766	1052	1.9962	0	0	0	Bacteria	Bacteroidota	Bacteroidia	Bacteroidales	Marinifilaceae	Sanguibacteroides
ZCML_adjusted	ASV481	-0.00470016	-0.0941541	0.0847538	0.0455874	0.917902	1052	6.46388	0	0	0	Bacteria	Firmicutes	Bacilli	Erysipelotrichales	Erysipelotrichaceae	Solobacterium
ZMGH1_adjusted	ASV503	-0.00575617	-0.11532	0.103807	0.0558356	0.91791	1052	10.4563	0	0	0	Bacteria	Firmicutes	Clostridia	Lachnospirales	Lachnospiraceae	Tuzzerella
ZCEL_adjusted	ASV8	-0.00551802	-0.112025	0.100989	0.0542779	0.919044	1052	96.673	653.5	319.75	1284.75	Bacteria	Firmicutes	Clostridia	Oscillospirales	Ruminococcaceae	Subdoligranulum
ZCML_adjusted	ASV936	0.00707349	-0.13303	0.147177	0.0713994	0.921102	1052	47.8137	0	0	14	Bacteria	Firmicutes	Clostridia	Oscillospirales	Ruminococcaceae	Paludicola
ZCEL_adjusted	ASV447	0.00250565	-0.0481425	0.0531538	0.0258112	0.922685	1052	1.3308	0	0	0	Bacteria	Proteobacteria	Gammaproteobacteria	Enterobacterales	Enterobacteriaceae	Enterobacter
ZCML_adjusted	ASV42	-0.00950234	-0.208422	0.189417	0.101373	0.925337	1052	71.9582	57	0	302	Bacteria	Firmicutes	Clostridia	Clostridiales	Clostridiaceae	Clostridium sensu stricto 1
ZCEL_adjusted	ASV1368	0.00424655	-0.0852815	0.0937746	0.0456251	0.925862	1052	18.8213	0	0	0	Bacteria	Firmicutes	Clostridia	Oscillospirales	Ruminococcaceae	Candidatus Soleaferrea
ZCML_adjusted	ASV1513	0.00308478	-0.0637425	0.069912	0.0340564	0.927845	1052	4.37262	0	0	0	Bacteria	Firmicutes	Bacilli	Erysipelotrichales	Erysipelotrichaceae	Faecalitalea
ZCML_adjusted	ASV567	-0.00638021	-0.147586	0.134825	0.0719608	0.929367	1052	32.9848	0	0	13	Bacteria	Firmicutes	Clostridia	Lachnospirales	Lachnospiraceae	Shuttleworthia
ZCEL_adjusted	ASV1812	0.00237679	-0.0520197	0.0567733	0.0277215	0.931691	1052	3.89734	0	0	0	Bacteria	Firmicutes	Clostridia	Eubacteriales	Eubacteriaceae	Eubacterium
ZMGH1_adjusted	ASV46	-0.00803872	-0.192083	0.176005	0.0937922	0.931715	1052	72.1483	35	0	160.25	Bacteria	Firmicutes	Clostridia	Oscillospirales	Ruminococcaceae	[Eubacterium] siraeum group
ZMGH1_adjusted	ASV208	0.00649277	-0.143201	0.156187	0.0762868	0.93219	1052	21.5779	0	0	0	Bacteria	Firmicutes	Bacilli	Lactobacillales	Lactobacillaceae	Lactobacillus
ZCML_adjusted	ASV489	0.00605853	-0.141774	0.153891	0.0753382	0.93592	1052	37.4525	0	0	12	Bacteria	Firmicutes	Bacilli	Erysipelotrichales	Erysipelatoclostridiaceae	Erysipelatoclostridium
ZCML_adjusted	ASV2160	-0.00245309	-0.0623593	0.0574531	0.0305293	0.935973	1052	6.65399	0	0	0	Bacteria	Firmicutes	Clostridia	Oscillospirales	Ruminococcaceae	Phocea
ZCML_adjusted	ASV1044	0.00219106	-0.0542442	0.0586263	0.0287605	0.939288	1052	1.80608	0	0	0	Bacteria	Firmicutes	Clostridia	Lachnospirales	Lachnospiraceae	Anaerosporobacter
ZMGH1_adjusted	ASV67	-0.00432315	-0.12043	0.111784	0.0591703	0.94177	1052	92.2053	75	29	141.25	Bacteria	Firmicutes	Clostridia	Monoglobales	Monoglobaceae	Monoglobus
ZCML_adjusted	ASV401	0.005433	-0.143092	0.153958	0.0756913	0.942792	1052	34.1255	0	0	9.25	Bacteria	Proteobacteria	Gammaproteobacteria	Burkholderiales	Sutterellaceae	Parasutterella
ZCEL_adjusted	ASV813	0.00423151	-0.113175	0.121638	0.0598327	0.943632	1052	21.3878	0	0	0	Bacteria	Firmicutes	Clostridia	Oscillospirales	Ruminococcaceae	Fournierella
ZCEL_adjusted	ASV181	0.00605108	-0.162725	0.174828	0.0860117	0.943927	1052	65.8745	29	0	82	Bacteria	Firmicutes	Clostridia	Lachnospirales	Lachnospiraceae	Marvinbryantia
ZCML_adjusted	ASV785	0.00296187	-0.0801442	0.086068	0.0423524	0.94426	1052	7.79468	0	0	0	Bacteria	Firmicutes	Bacilli	Erysipelotrichales	Erysipelatoclostridiaceae	Coprobacillus
ZCEL_adjusted	ASV1176	0.00238192	-0.0647384	0.0695022	0.0342057	0.944497	1052	5.89354	0	0	0	Bacteria	Firmicutes	Clostridia	Peptostreptococcales-Tissierellales	Anaerovoracaceae	[Eubacterium] nodatum group
ZMGH1_adjusted	ASV71	0.00554025	-0.155164	0.166244	0.0818978	0.946079	1052	80.3232	61	9	180.25	Bacteria	Bacteroidota	Bacteroidia	Bacteroidales	Tannerellaceae	Parabacteroides
ZCEL_adjusted	ASV330	0.00394551	-0.111179	0.11907	0.0586698	0.946396	1052	10.6464	0	0	0	Bacteria	Bacteroidota	Bacteroidia	Bacteroidales	Prevotellaceae	Prevotella_7
ZCML_adjusted	ASV1844	-0.00145592	-0.044467	0.0415552	0.0219193	0.947055	1052	1.23574	0	0	0	Bacteria	Firmicutes	Bacilli	Lactobacillales	Lactobacillaceae	Weissella
ZCEL_adjusted	ASV6	-0.00322651	-0.111056	0.104603	0.0549517	0.95319	1052	96.673	700	330.75	1266.25	Bacteria	Firmicutes	Clostridia	Lachnospirales	Lachnospiraceae	[Eubacterium] hallii group
ZCML_adjusted	ASV2119	-0.00187369	-0.0701759	0.0664285	0.0348081	0.957082	1052	9.5057	0	0	0	Bacteria	Firmicutes	Clostridia	Christensenellales	Christensenellaceae	Christensenella
ZCML_adjusted	ASV2	0.00333423	-0.1186	0.125268	0.0621398	0.957219	1052	95.8175	859.5	385	1711.75	Bacteria	Firmicutes	Clostridia	Lachnospirales	Lachnospiraceae	Agathobacter
ZCML_adjusted	ASV246	0.00352694	-0.138786	0.14584	0.0725252	0.961223	1052	22.7186	0	0	0	Bacteria	Firmicutes	Clostridia	Lachnospirales	Lachnospiraceae	Lachnospiraceae AC2044 group
ZCEL_adjusted	ASV785	0.00202861	-0.0807517	0.084809	0.0421864	0.961656	1052	7.79468	0	0	0	Bacteria	Firmicutes	Bacilli	Erysipelotrichales	Erysipelatoclostridiaceae	Coprobacillus
ZCML_adjusted	ASV490	-0.0025363	-0.106885	0.101813	0.0531782	0.961969	1052	11.7871	0	0	0	Bacteria	Firmicutes	Clostridia	Lachnospirales	Lachnospiraceae	UC5-1-2E3
ZCML_adjusted	ASV1762	-0.0013039	-0.0564292	0.0538214	0.0280929	0.962989	1052	3.13688	0	0	0	Bacteria	Firmicutes	Clostridia	Oscillospirales	Hungateiclostridiaceae	Ruminiclostridium
ZCML_adjusted	ASV434	-0.00295276	-0.136762	0.130857	0.0681917	0.96547	1052	24.5247	0	0	0	Bacteria	Firmicutes	Clostridia	Oscillospirales	Oscillospiraceae	Flavonifractor
ZMGH1_adjusted	ASV98	0.00357277	-0.16777	0.174916	0.0873195	0.967371	1052	21.673	0	0	0	Bacteria	Firmicutes	Clostridia	Lachnospirales	Lachnospiraceae	[Ruminococcus] gnavus group
ZCEL_adjusted	ASV20	0.00194308	-0.0932994	0.0971856	0.0485373	0.968075	1052	98.9544	1143.5	396.75	2518.75	Bacteria	Bacteroidota	Bacteroidia	Bacteroidales	Bacteroidaceae	Bacteroides
ZMGH1_adjusted	ASV554	0.00167297	-0.0838923	0.0872382	0.0436056	0.969403	1052	5.03802	0	0	0	Bacteria	Firmicutes	Clostridia	Lachnospirales	Lachnospiraceae	[Bacteroides] pectinophilus group
ZCML_adjusted	ASV621	-0.00218524	-0.114884	0.110513	0.0574332	0.969656	1052	13.9734	0	0	0	Bacteria	Firmicutes	Clostridia	Lachnospirales	Lachnospiraceae	Eisenbergiella
ZCML_adjusted	ASV26	0.00262937	-0.143957	0.149216	0.0747032	0.971929	1052	90.5894	335	104.75	814.25	Bacteria	Firmicutes	Clostridia	Oscillospirales	Oscillospiraceae	UCG-002
ZMGH1_adjusted	ASV481	0.00126936	-0.088183	0.0907217	0.0455866	0.977791	1052	6.46388	0	0	0	Bacteria	Firmicutes	Bacilli	Erysipelotrichales	Erysipelotrichaceae	Solobacterium
ZMGH1_adjusted	ASV50	0.00195854	-0.141871	0.145788	0.0732984	0.978688	1052	89.5437	176.5	52	450	Bacteria	Firmicutes	Clostridia	Lachnospirales	Lachnospiraceae	Lachnospiraceae NK4A136 group
ZMGH1_adjusted	ASV2872	-0.000537302	-0.0426461	0.0415715	0.0214594	0.980029	1052	1.71103	0	0	0	Bacteria	Actinobacteriota	Actinobacteria	Bifidobacteriales	Bifidobacteriaceae	Alloscardovia
ZCML_adjusted	ASV1128	-0.00080461	-0.0651522	0.0635429	0.0327927	0.98043	1052	3.04183	0	0	0	Bacteria	Bacteroidota	Bacteroidia	Bacteroidales	Prevotellaceae	Prevotella
ZCML_adjusted	ASV10	0.00109371	-0.101143	0.10333	0.0521016	0.983256	1052	96.5779	424.5	214.75	800.5	Bacteria	Firmicutes	Clostridia	Lachnospirales	Lachnospiraceae	Dorea
ZCEL_adjusted	ASV30	0.00220956	-0.219901	0.22432	0.113192	0.98443	1052	31.749	0	0	84.25	Bacteria	Firmicutes	Clostridia	Oscillospirales	Ruminococcaceae	CAG-352
ZMGH1_adjusted	ASV229	-0.000989213	-0.111766	0.109788	0.056454	0.986023	1052	10.7414	0	0	0	Bacteria	Firmicutes	Bacilli	Lactobacillales	Enterococcaceae	Enterococcus
ZCML_adjusted	ASV71	0.00136242	-0.159346	0.16207	0.0818998	0.986731	1052	80.3232	61	9	180.25	Bacteria	Bacteroidota	Bacteroidia	Bacteroidales	Tannerellaceae	Parabacteroides
ZCEL_adjusted	ASV921	-0.00065301	-0.0784847	0.0771787	0.0396645	0.986868	1052	6.36882	0	0	0	Bacteria	Firmicutes	Clostridia	Lachnospirales	Lachnospiraceae	Oribacterium
ZMGH1_adjusted	ASV177	0.000567707	-0.0890012	0.0901366	0.045646	0.990079	1052	4.18251	0	0	0	Bacteria	Firmicutes	Negativicutes	Acidaminococcales	Acidaminococcaceae	Succiniclasticum
ZCML_adjusted	ASV3115	0.00027549	-0.044505	0.045056	0.022821	0.990371	1052	3.04183	0	0	0	Bacteria	Firmicutes	Bacilli	Lactobacillales	Lactobacillaceae	Leuconostoc
ZCEL_adjusted	ASV201	0.000804446	-0.164286	0.165895	0.084133	0.992373	1052	40.8745	0	0	34.25	Bacteria	Firmicutes	Clostridia	Lachnospirales	Lachnospiraceae	Lachnospiraceae UCG-001
ZCML_adjusted	ASV640	0.000229489	-0.0633785	0.0638375	0.0324158	0.994353	1052	2.6616	0	0	0	Bacteria	Firmicutes	Clostridia	Lachnospirales	Lachnospiraceae	Lachnospiraceae UCG-007
ZCML_adjusted	ASV2894	9.35384e-05	-0.0493448	0.0495319	0.0251947	0.997038	1052	6.46388	0	0	0	Bacteria	Firmicutes	Clostridia	Oscillospirales	Oscillospiraceae	Papillibacter
ZMGH1_adjusted	ASV40	0.000151247	-0.0996929	0.0999954	0.0508824	0.997629	1052	96.673	352	169.5	657.5	Bacteria	Firmicutes	Clostridia	Lachnospirales	Lachnospiraceae	Roseburia
ZCEL_adjusted	ASV58	0.000234945	-0.183976	0.184446	0.0938774	0.998004	1052	71.8631	48.5	0	168	Bacteria	Firmicutes	Bacilli	Erysipelotrichales	Erysipelatoclostridiaceae	Erysipelotrichaceae UCG-003
ZCML_adjusted	ASV177	-5.22792e-05	-0.0896233	0.0895187	0.045647	0.999086	1052	4.18251	0	0	0	Bacteria	Firmicutes	Negativicutes	Acidaminococcales	Acidaminococcaceae	Succiniclasticum

## Sheet: suppl table 4
Factor	Taxon	Beta	CI95_L	CI95_U	Se	p	N	presence	median.count	IQR.L	IQR.U	Kingdom	Phylum	Class	Order	Family	Genus	95% CI
ZMGH1_adjusted	ASV387	0.159141	0.0603184	0.257963	0.0503612	0.00162377	1052	5.13308	0	0	0	Bacteria	Proteobacteria	Gammaproteobacteria	Enterobacterales	Enterobacteriaceae	Klebsiella	0.16 (0.06, 0.26)
ZCML_adjusted	ASV32	0.280795	0.0953649	0.466225	0.0944977	0.00303284	1052	80.7034	77	13	345.25	Bacteria	Firmicutes	Bacilli	Lactobacillales	Streptococcaceae	Streptococcus	0.28 (0.1, 0.47)
ZCEL_adjusted	ASV387	0.142834	0.0482081	0.237461	0.0482229	0.003127	1052	5.13308	0	0	0	Bacteria	Proteobacteria	Gammaproteobacteria	Enterobacterales	Enterobacteriaceae	Klebsiella	0.14 (0.05, 0.24)
ZCML_adjusted	ASV204	-0.22212	-0.371561	-0.0726782	0.0761574	0.00361562	1052	75.1901	27	3.75	63	Bacteria	Firmicutes	Clostridia	Oscillospirales	Oscillospiraceae	Colidextribacter	-0.22 (-0.37, -0.07)
ZMGH1_adjusted	ASV448	-0.173212	-0.292176	-0.0542482	0.0606256	0.00436164	1052	16.1597	0	0	0	Bacteria	Firmicutes	Bacilli	Lactobacillales	Streptococcaceae	Lactococcus	-0.17 (-0.29, -0.05)
ZCML_adjusted	ASV540	-0.250504	-0.428638	-0.0723689	0.0907799	0.00589235	1052	43.8213	0	0	38	Bacteria	Bacteroidota	Bacteroidia	Bacteroidales	Barnesiellaceae	Barnesiella	-0.25 (-0.43, -0.07)
ZCEL_adjusted	ASV96	-0.253994	-0.435943	-0.0720454	0.0927237	0.00626408	1052	30.4183	0	0	33	Bacteria	Firmicutes	Clostridia	Peptostreptococcales-Tissierellales	Peptostreptococcaceae	Terrisporobacter	-0.25 (-0.44, -0.07)
ZCEL_adjusted	ASV10	0.138052	0.0359101	0.240195	0.0520531	0.00812119	1052	96.5779	424.5	214.75	800.5	Bacteria	Firmicutes	Clostridia	Lachnospirales	Lachnospiraceae	Dorea	0.14 (0.04, 0.24)
ZMGH1_adjusted	ASV123	-0.1899	-0.342992	-0.0368083	0.0780178	0.0150995	1052	84.1255	72.5	14.75	199.25	Bacteria	Firmicutes	Clostridia	Oscillospirales	Oscillospiraceae	UCG-005	-0.19 (-0.34, -0.04)
ZCML_adjusted	ASV2061	-0.0911588	-0.165286	-0.0170318	0.0377761	0.0159898	1052	9.22053	0	0	0	Bacteria	Firmicutes	Clostridia	Oscillospirales	Ruminococcaceae	Caproiciproducens	-0.09 (-0.17, -0.02)
ZCEL_adjusted	ASV597	-0.100087	-0.182566	-0.0176091	0.042032	0.0174366	1052	5.79848	0	0	0	Bacteria	Firmicutes	Clostridia	Lachnospirales	Lachnospiraceae	Lachnospiraceae UCG-003	-0.1 (-0.18, -0.02)
ZMGH1_adjusted	ASV1	0.0851315	0.0147188	0.155544	0.0358833	0.0178532	1052	99.5247	2396.5	1302.75	4277.75	Bacteria	Firmicutes	Clostridia	Lachnospirales	Lachnospiraceae	Blautia	0.09 (0.01, 0.16)
ZMGH1_adjusted	ASV10	0.128911	0.022104	0.235718	0.0544304	0.0180506	1052	96.5779	424.5	214.75	800.5	Bacteria	Firmicutes	Clostridia	Lachnospirales	Lachnospiraceae	Dorea	0.13 (0.02, 0.24)
ZCML_adjusted	ASV446	-0.159694	-0.293514	-0.0258738	0.0681965	0.0193875	1052	20.1521	0	0	0	Bacteria	Actinobacteriota	Coriobacteriia	Coriobacteriales	Eggerthellaceae	Enterorhabdus	-0.16 (-0.29, -0.03)
ZCEL_adjusted	ASV430	-0.155794	-0.291025	-0.0205628	0.0689158	0.0239892	1052	34.7909	0	0	14	Bacteria	Firmicutes	Clostridia	Lachnospirales	Lachnospiraceae	GCA-900066575	-0.16 (-0.29, -0.02)
ZCEL_adjusted	ASV123	-0.167463	-0.314032	-0.0208928	0.074694	0.0251747	1052	84.1255	72.5	14.75	199.25	Bacteria	Firmicutes	Clostridia	Oscillospirales	Oscillospiraceae	UCG-005	-0.17 (-0.31, -0.02)
ZCML_adjusted	ASV161	-0.124373	-0.233622	-0.015124	0.0556749	0.0257025	1052	6.27376	0	0	0	Bacteria	Bacteroidota	Bacteroidia	Bacteroidales	Muribaculaceae	CAG-873	-0.12 (-0.23, -0.02)
ZCEL_adjusted	ASV1	0.0749479	0.00753593	0.14236	0.0343541	0.0293623	1052	99.5247	2396.5	1302.75	4277.75	Bacteria	Firmicutes	Clostridia	Lachnospirales	Lachnospiraceae	Blautia	0.07 (0.01, 0.14)
ZMGH1_adjusted	ASV540	-0.204202	-0.388815	-0.0195887	0.0940814	0.0301984	1052	43.8213	0	0	38	Bacteria	Bacteroidota	Bacteroidia	Bacteroidales	Barnesiellaceae	Barnesiella	-0.2 (-0.39, -0.02)
ZMGH1_adjusted	ASV597	-0.0944195	-0.180649	-0.00818989	0.0439438	0.0318954	1052	5.79848	0	0	0	Bacteria	Firmicutes	Clostridia	Lachnospirales	Lachnospiraceae	Lachnospiraceae UCG-003	-0.09 (-0.18, -0.01)
ZMGH1_adjusted	ASV430	-0.154725	-0.296069	-0.0133805	0.072031	0.031944	1052	34.7909	0	0	14	Bacteria	Firmicutes	Clostridia	Lachnospirales	Lachnospiraceae	GCA-900066575	-0.15 (-0.3, -0.01)
ZCEL_adjusted	ASV17	0.118269	0.0095822	0.226955	0.0553882	0.0329743	1052	96.0076	511.5	238.75	1024	Bacteria	Firmicutes	Clostridia	Lachnospirales	Lachnospiraceae	Coprococcus	0.12 (0.01, 0.23)
ZMGH1_adjusted	ASV2915	0.0618724	0.00481105	0.118934	0.0290793	0.0335976	1052	3.9924	0	0	0	Bacteria	Actinobacteriota	Actinobacteria	Actinomycetales	Actinomycetaceae	Actinomyces	0.06 (0, 0.12)
ZCEL_adjusted	ASV448	-0.123115	-0.237163	-0.00906706	0.0581205	0.0343908	1052	16.1597	0	0	0	Bacteria	Firmicutes	Bacilli	Lactobacillales	Streptococcaceae	Lactococcus	-0.12 (-0.24, -0.01)
ZCML_adjusted	ASV918	0.0813732	0.00552977	0.157217	0.0386509	0.0355034	1052	6.36882	0	0	0	Bacteria	Firmicutes	Bacilli	Lactobacillales	Lactobacillaceae	Lacticaseibacillus	0.08 (0.01, 0.16)
ZCEL_adjusted	ASV204	-0.157768	-0.306071	-0.00946548	0.0755771	0.0370871	1052	75.1901	27	3.75	63	Bacteria	Firmicutes	Clostridia	Oscillospirales	Oscillospiraceae	Colidextribacter	-0.16 (-0.31, -0.01)
ZMGH1_adjusted	ASV403	0.0947933	0.00534987	0.184237	0.0455816	0.0378056	1052	6.17871	0	0	0	Bacteria	Firmicutes	Bacilli	Lactobacillales	Lactobacillaceae	Limosilactobacillus	0.09 (0.01, 0.18)
ZMGH1_adjusted	ASV1062	-0.13549	-0.265406	-0.00557395	0.0662071	0.0409646	1052	39.924	0	0	8	Bacteria	Firmicutes	Clostridia	Lachnospirales	Defluviitaleaceae	Defluviitaleaceae UCG-011	-0.14 (-0.27, -0.01)
ZCEL_adjusted	ASV540	-0.182682	-0.359405	-0.00596017	0.0900601	0.0427713	1052	43.8213	0	0	38	Bacteria	Bacteroidota	Bacteroidia	Bacteroidales	Barnesiellaceae	Barnesiella	-0.18 (-0.36, -0.01)
ZCML_adjusted	ASV701	-0.0977083	-0.192777	-0.0026399	0.0484482	0.0439798	1052	7.31939	0	0	0	Bacteria	Firmicutes	Clostridia	Lachnospirales	Lachnospiraceae	Frisingicoccus	-0.1 (-0.19, 0)
ZMGH1_adjusted	ASV2250	0.0551686	0.00104239	0.109295	0.0275835	0.045756	1052	4.08745	0	0	0	Bacteria	Firmicutes	Bacilli	Lactobacillales	Carnobacteriaceae	Granulicatella	0.06 (0, 0.11)
ZMGH1_adjusted	ASV196	0.129559	-0.000479075	0.259597	0.0662693	0.0508484	1052	9.88593	0	0	0	Bacteria	Firmicutes	Bacilli	Lactobacillales	Lactobacillaceae	Ligilactobacillus	0.13 (0, 0.26)
ZCEL_adjusted	ASV898	0.0828884	-0.000317452	0.166094	0.0424029	0.0508789	1052	6.93916	0	0	0	Bacteria	Firmicutes	Bacilli	Erysipelotrichales	Erysipelotrichaceae	Catenisphaera	0.08 (0, 0.17)
ZMGH1_adjusted	ASV204	-0.154382	-0.309392	0.000627145	0.078995	0.0509324	1052	75.1901	27	3.75	63	Bacteria	Firmicutes	Clostridia	Oscillospirales	Oscillospiraceae	Colidextribacter	-0.15 (-0.31, 0)
ZCML_adjusted	ASV1534	-0.0964925	-0.194176	0.00119119	0.049781	0.0528546	1052	20.057	0	0	0	Bacteria	Firmicutes	Clostridia	Oscillospirales	Butyricicoccaceae	UCG-009	-0.1 (-0.19, 0)
ZCEL_adjusted	ASV161	-0.106102	-0.21437	0.00216517	0.0551747	0.054752	1052	6.27376	0	0	0	Bacteria	Bacteroidota	Bacteroidia	Bacteroidales	Muribaculaceae	CAG-873	-0.11 (-0.21, 0)
ZCEL_adjusted	ASV2250	0.0503143	-0.00149271	0.102121	0.0264016	0.0569633	1052	4.08745	0	0	0	Bacteria	Firmicutes	Bacilli	Lactobacillales	Carnobacteriaceae	Granulicatella	0.05 (0, 0.1)
ZCEL_adjusted	ASV104	0.197013	-0.00853011	0.402555	0.104747	0.0602763	1052	38.8783	0	0	83.25	Bacteria	Firmicutes	Bacilli	Erysipelotrichales	Erysipelotrichaceae	Holdemanella	0.2 (-0.01, 0.4)
ZCEL_adjusted	ASV35	-0.140723	-0.287701	0.00625372	0.0749016	0.0605571	1052	90.3992	261.5	51.75	737.5	Bacteria	Firmicutes	Clostridia	Christensenellales	Christensenellaceae	Christensenellaceae R-7 group	-0.14 (-0.29, 0.01)
ZCML_adjusted	ASV17	0.104365	-0.00543311	0.214163	0.0559545	0.0624416	1052	96.0076	511.5	238.75	1024	Bacteria	Firmicutes	Clostridia	Lachnospirales	Lachnospiraceae	Coprococcus	0.1 (-0.01, 0.21)
ZCML_adjusted	ASV96	-0.173684	-0.357759	0.0103916	0.0938073	0.0643847	1052	30.4183	0	0	33	Bacteria	Firmicutes	Clostridia	Peptostreptococcales-Tissierellales	Peptostreptococcaceae	Terrisporobacter	-0.17 (-0.36, 0.01)
ZCML_adjusted	ASV104	0.195501	-0.012047	0.403049	0.105769	0.0648351	1052	38.8783	0	0	83.25	Bacteria	Firmicutes	Bacilli	Erysipelotrichales	Erysipelotrichaceae	Holdemanella	0.2 (-0.01, 0.4)
ZMGH1_adjusted	ASV41	0.185552	-0.0131258	0.38423	0.101249	0.067146	1052	75	100.5	4.5	235	Bacteria	Firmicutes	Clostridia	Lachnospirales	Lachnospiraceae	[Ruminococcus] gauvreauii group	0.19 (-0.01, 0.38)
ZCEL_adjusted	ASV41	0.176126	-0.0140095	0.366262	0.0968959	0.0694025	1052	75	100.5	4.5	235	Bacteria	Firmicutes	Clostridia	Lachnospirales	Lachnospiraceae	[Ruminococcus] gauvreauii group	0.18 (-0.01, 0.37)
ZCEL_adjusted	ASV1062	-0.114214	-0.238598	0.0101703	0.0633878	0.0718654	1052	39.924	0	0	8	Bacteria	Firmicutes	Clostridia	Lachnospirales	Defluviitaleaceae	Defluviitaleaceae UCG-011	-0.11 (-0.24, 0.01)
ZCML_adjusted	ASV383	0.0932073	-0.00830081	0.194715	0.0517299	0.0718683	1052	10.3612	0	0	0	Bacteria	Firmicutes	Clostridia	Lachnospirales	Lachnospiraceae	Hungatella	0.09 (-0.01, 0.19)
ZCML_adjusted	ASV151	0.143801	-0.0133835	0.300985	0.0801033	0.0729163	1052	64.5437	12	0	30	Bacteria	Firmicutes	Clostridia	Oscillospirales	Ruminococcaceae	UBA1819	0.14 (-0.01, 0.3)
ZMGH1_adjusted	ASV44	0.207592	-0.0210633	0.436248	0.116526	0.0751239	1052	33.4601	0	0	87.5	Bacteria	Firmicutes	Negativicutes	Veillonellales-Selenomonadales	Veillonellaceae	Dialister	0.21 (-0.02, 0.44)
ZMGH1_adjusted	ASV542	-0.124737	-0.262687	0.0132133	0.0703014	0.0763061	1052	15.019	0	0	0	Bacteria	Firmicutes	Clostridia	Lachnospirales	Lachnospiraceae	Sellimonas	-0.12 (-0.26, 0.01)
ZCML_adjusted	ASV378	-0.131827	-0.279068	0.0154134	0.0750358	0.0792395	1052	41.0646	0	0	13	Bacteria	Firmicutes	Clostridia	Oscillospirales	Ruminococcaceae	DTU089	-0.13 (-0.28, 0.02)
ZCML_adjusted	ASV123	-0.132562	-0.280692	0.0155681	0.0754892	0.0793786	1052	84.1255	72.5	14.75	199.25	Bacteria	Firmicutes	Clostridia	Oscillospirales	Oscillospiraceae	UCG-005	-0.13 (-0.28, 0.02)
ZCML_adjusted	ASV2211	0.06927	-0.00847669	0.147017	0.0396208	0.0807058	1052	7.98479	0	0	0	Bacteria	Firmicutes	Negativicutes	Veillonellales-Selenomonadales	Veillonellaceae	Allisonella	0.07 (-0.01, 0.15)
ZCEL_adjusted	ASV2040	-0.0588448	-0.125034	0.00734458	0.033731	0.0813649	1052	9.31559	0	0	0	Bacteria	Firmicutes	Clostridia	Eubacteriales	Anaerofustaceae	Anaerofustis	-0.06 (-0.13, 0.01)
ZMGH1_adjusted	ASV94	-0.133054	-0.282725	0.0166167	0.0762743	0.081385	1052	86.1217	72	20	155.25	Bacteria	Firmicutes	Clostridia	Lachnospirales	Lachnospiraceae	[Eubacterium] ventriosum group	-0.13 (-0.28, 0.02)
ZCEL_adjusted	ASV2965	0.0375019	-0.00496397	0.0799678	0.0216412	0.0834138	1052	2.09125	0	0	0	Bacteria	Firmicutes	Clostridia	Peptostreptococcales-Tissierellales	Family XI	Fenollaria	0.04 (0, 0.08)
ZCEL_adjusted	ASV403	0.0754896	-0.0101614	0.161141	0.0436489	0.0840243	1052	6.17871	0	0	0	Bacteria	Firmicutes	Bacilli	Lactobacillales	Lactobacillaceae	Limosilactobacillus	0.08 (-0.01, 0.16)
ZCML_adjusted	ASV13	-0.0936459	-0.200148	0.0128564	0.054275	0.0847562	1052	97.4335	466	195.75	931.5	Bacteria	Firmicutes	Clostridia	Lachnospirales	Lachnospiraceae	Anaerostipes	-0.09 (-0.2, 0.01)
ZCML_adjusted	ASV97	-0.135463	-0.290954	0.0200274	0.0792403	0.0876545	1052	84.6008	103	26	263.25	Bacteria	Firmicutes	Clostridia	Oscillospirales	Oscillospiraceae	NK4A214 group	-0.14 (-0.29, 0.02)
ZCML_adjusted	ASV2965	0.0372534	-0.00562634	0.080133	0.0218521	0.0885341	1052	2.09125	0	0	0	Bacteria	Firmicutes	Clostridia	Peptostreptococcales-Tissierellales	Family XI	Fenollaria	0.04 (-0.01, 0.08)
ZCEL_adjusted	ASV1024	0.0833037	-0.0137888	0.180396	0.0494797	0.0925633	1052	18.0608	0	0	0	Bacteria	Patescibacteria	Saccharimonadia	Saccharimonadales	Saccharimonadaceae	TM7x	0.08 (-0.01, 0.18)
ZMGH1_adjusted	ASV434	0.119798	-0.0207257	0.260321	0.0716127	0.0946593	1052	24.5247	0	0	0	Bacteria	Firmicutes	Clostridia	Oscillospirales	Oscillospiraceae	Flavonifractor	0.12 (-0.02, 0.26)
ZCML_adjusted	ASV286	0.132075	-0.0234489	0.2876	0.0792573	0.0959354	1052	26.9962	0	0	13	Bacteria	Firmicutes	Clostridia	Lachnospirales	Lachnospiraceae	Howardella	0.13 (-0.02, 0.29)
ZCEL_adjusted	ASV1204	0.065913	-0.0130881	0.144914	0.0402601	0.101898	1052	5.98859	0	0	0	Bacteria	Firmicutes	Clostridia	Lachnospirales	Lachnospiraceae	FD2005	0.07 (-0.01, 0.14)
ZCEL_adjusted	ASV542	-0.109663	-0.241711	0.0223841	0.0672932	0.103484	1052	15.019	0	0	0	Bacteria	Firmicutes	Clostridia	Lachnospirales	Lachnospiraceae	Sellimonas	-0.11 (-0.24, 0.02)
ZCML_adjusted	ASV921	0.0661362	-0.0136794	0.145952	0.0406752	0.104264	1052	6.36882	0	0	0	Bacteria	Firmicutes	Clostridia	Lachnospirales	Lachnospiraceae	Oribacterium	0.07 (-0.01, 0.15)
ZMGH1_adjusted	ASV1204	0.0684022	-0.0141516	0.150956	0.0420706	0.104279	1052	5.98859	0	0	0	Bacteria	Firmicutes	Clostridia	Lachnospirales	Lachnospiraceae	FD2005	0.07 (-0.01, 0.15)
ZCML_adjusted	ASV576	0.0868005	-0.0179752	0.191576	0.0533951	0.104335	1052	10.1711	0	0	0	Bacteria	Actinobacteriota	Coriobacteriia	Coriobacteriales	Eggerthellaceae	Eggerthella	0.09 (-0.02, 0.19)
ZMGH1_adjusted	ASV32	0.158445	-0.0340362	0.350927	0.0980913	0.106555	1052	80.7034	77	13	345.25	Bacteria	Firmicutes	Bacilli	Lactobacillales	Streptococcaceae	Streptococcus	0.16 (-0.03, 0.35)
ZMGH1_adjusted	ASV898	0.0715544	-0.0154429	0.158552	0.0443351	0.106845	1052	6.93916	0	0	0	Bacteria	Firmicutes	Bacilli	Erysipelotrichales	Erysipelotrichaceae	Catenisphaera	0.07 (-0.02, 0.16)
ZMGH1_adjusted	ASV3864	0.0312792	-0.00685114	0.0694095	0.0194318	0.107771	1052	1.23574	0	0	0	Bacteria	Actinobacteriota	Actinobacteria	Micrococcales	Micrococcaceae	Rothia	0.03 (-0.01, 0.07)
ZMGH1_adjusted	ASV96	-0.156107	-0.346687	0.0344735	0.0971224	0.108291	1052	30.4183	0	0	33	Bacteria	Firmicutes	Clostridia	Peptostreptococcales-Tissierellales	Peptostreptococcaceae	Terrisporobacter	-0.16 (-0.35, 0.03)
ZCEL_adjusted	ASV936	-0.115252	-0.256409	0.0259053	0.0719355	0.109429	1052	47.8137	0	0	14	Bacteria	Firmicutes	Clostridia	Oscillospirales	Ruminococcaceae	Paludicola	-0.12 (-0.26, 0.03)
ZMGH1_adjusted	ASV701	-0.0798495	-0.17831	0.0186115	0.0501771	0.111837	1052	7.31939	0	0	0	Bacteria	Firmicutes	Clostridia	Lachnospirales	Lachnospiraceae	Frisingicoccus	-0.08 (-0.18, 0.02)
ZMGH1_adjusted	ASV284	-0.0610475	-0.13633	0.0142349	0.038365	0.111865	1052	2.37643	0	0	0	Bacteria	Firmicutes	Negativicutes	Veillonellales-Selenomonadales	Selenomonadaceae	Megamonas	-0.06 (-0.14, 0.01)
ZMGH1_adjusted	ASV7	0.106028	-0.0254338	0.23749	0.0669949	0.113812	1052	94.3916	435	192.75	841.25	Bacteria	Firmicutes	Clostridia	Lachnospirales	Lachnospiraceae	Fusicatenibacter	0.11 (-0.03, 0.24)
ZMGH1_adjusted	ASV35	-0.121696	-0.275363	0.0319713	0.0783108	0.12049	1052	90.3992	261.5	51.75	737.5	Bacteria	Firmicutes	Clostridia	Christensenellales	Christensenellaceae	Christensenellaceae R-7 group	-0.12 (-0.28, 0.03)
ZCML_adjusted	ASV597	-0.0657066	-0.149117	0.0177036	0.042507	0.122464	1052	5.79848	0	0	0	Bacteria	Firmicutes	Clostridia	Lachnospirales	Lachnospiraceae	Lachnospiraceae UCG-003	-0.07 (-0.15, 0.02)
ZCML_adjusted	ASV417	0.0876322	-0.0257171	0.200981	0.0577644	0.129558	1052	16.1597	0	0	0	Bacteria	Actinobacteriota	Coriobacteriia	Coriobacteriales	Eggerthellaceae	Slackia	0.09 (-0.03, 0.2)
ZCEL_adjusted	ASV82	0.186537	-0.0560188	0.429092	0.12361	0.131585	1052	36.4068	0	0	177	Bacteria	Bacteroidota	Bacteroidia	Bacteroidales	Prevotellaceae	Prevotella_9	0.19 (-0.06, 0.43)
ZCEL_adjusted	ASV2160	0.0459135	-0.0144541	0.106281	0.0307642	0.135891	1052	6.65399	0	0	0	Bacteria	Firmicutes	Clostridia	Oscillospirales	Ruminococcaceae	Phocea	0.05 (-0.01, 0.11)
ZCML_adjusted	ASV448	-0.0868937	-0.202176	0.0283886	0.0587495	0.139431	1052	16.1597	0	0	0	Bacteria	Firmicutes	Bacilli	Lactobacillales	Streptococcaceae	Lactococcus	-0.09 (-0.2, 0.03)
ZCEL_adjusted	ASV417	0.0845803	-0.0276867	0.196847	0.0572128	0.139621	1052	16.1597	0	0	0	Bacteria	Actinobacteriota	Coriobacteriia	Coriobacteriales	Eggerthellaceae	Slackia	0.08 (-0.03, 0.2)
ZCEL_adjusted	ASV77	-0.0714713	-0.166375	0.0234323	0.0483642	0.139774	1052	95.6274	79.5	36	156.25	Bacteria	Firmicutes	Clostridia	Oscillospirales	Ruminococcaceae	Incertae Sedis	-0.07 (-0.17, 0.02)
ZCEL_adjusted	ASV97	-0.116004	-0.270056	0.0380489	0.0785073	0.139816	1052	84.6008	103	26	263.25	Bacteria	Firmicutes	Clostridia	Oscillospirales	Oscillospiraceae	NK4A214 group	-0.12 (-0.27, 0.04)
ZMGH1_adjusted	ASV197	0.128048	-0.0423265	0.298423	0.0868252	0.140578	1052	25.4753	0	0	3	Bacteria	Firmicutes	Clostridia	Lachnospirales	Lachnospiraceae	Tyzzerella	0.13 (-0.04, 0.3)
ZCEL_adjusted	ASV369	0.120199	-0.039875	0.280274	0.0815761	0.140932	1052	42.2053	0	0	22	Bacteria	Firmicutes	Clostridia	Oscillospirales	Ruminococcaceae	Negativibacillus	0.12 (-0.04, 0.28)
ZCML_adjusted	ASV3864	0.0274766	-0.00937537	0.0643285	0.0187803	0.143757	1052	1.23574	0	0	0	Bacteria	Actinobacteriota	Actinobacteria	Micrococcales	Micrococcaceae	Rothia	0.03 (-0.01, 0.06)
ZCML_adjusted	ASV197	-0.122543	-0.287172	0.0420872	0.0838976	0.144425	1052	25.4753	0	0	3	Bacteria	Firmicutes	Clostridia	Lachnospirales	Lachnospiraceae	Tyzzerella	-0.12 (-0.29, 0.04)
ZMGH1_adjusted	ASV1749	0.0396775	-0.0147518	0.0941069	0.027738	0.152893	1052	3.23194	0	0	0	Bacteria	Actinobacteriota	Coriobacteriia	Coriobacteriales	Atopobiaceae	Coriobacteriaceae UCG-002	0.04 (-0.01, 0.09)
ZCEL_adjusted	ASV166	0.106877	-0.0398286	0.253582	0.0747631	0.153153	1052	13.308	0	0	0	Bacteria	Firmicutes	Bacilli	Erysipelotrichales	Erysipelatoclostridiaceae	Catenibacterium	0.11 (-0.04, 0.25)
ZMGH1_adjusted	ASV665	0.1028	-0.0390467	0.244646	0.072287	0.155298	1052	22.8137	0	0	0	Bacteria	Actinobacteriota	Coriobacteriia	Coriobacteriales	Eggerthellaceae	Adlercreutzia	0.1 (-0.04, 0.24)
ZMGH1_adjusted	ASV97	-0.115669	-0.276662	0.0453234	0.0820442	0.158888	1052	84.6008	103	26	263.25	Bacteria	Firmicutes	Clostridia	Oscillospirales	Oscillospiraceae	NK4A214 group	-0.12 (-0.28, 0.05)
ZMGH1_adjusted	ASV726	0.080266	-0.0315915	0.192123	0.0570041	0.159411	1052	22.4335	0	0	0	Bacteria	Bacteroidota	Bacteroidia	Bacteroidales	Barnesiellaceae	Coprobacter	0.08 (-0.03, 0.19)
ZCEL_adjusted	ASV930	-0.0586274	-0.140787	0.0235326	0.0418699	0.161746	1052	10.076	0	0	0	Bacteria	Firmicutes	Clostridia	Lachnospirales	Lachnospiraceae	[Eubacterium] fissicatena group	-0.06 (-0.14, 0.02)
ZCEL_adjusted	ASV196	0.0886144	-0.0359427	0.213171	0.063476	0.163006	1052	9.88593	0	0	0	Bacteria	Firmicutes	Bacilli	Lactobacillales	Lactobacillaceae	Ligilactobacillus	0.09 (-0.04, 0.21)
ZMGH1_adjusted	ASV2040	-0.0491979	-0.118399	0.0200036	0.035266	0.163302	1052	9.31559	0	0	0	Bacteria	Firmicutes	Clostridia	Eubacteriales	Anaerofustaceae	Anaerofustis	-0.05 (-0.12, 0.02)
ZCEL_adjusted	ASV284	-0.0511761	-0.123241	0.0208884	0.0367251	0.163771	1052	2.37643	0	0	0	Bacteria	Firmicutes	Negativicutes	Veillonellales-Selenomonadales	Selenomonadaceae	Megamonas	-0.05 (-0.12, 0.02)
ZCEL_adjusted	ASV39	0.10464	-0.0429733	0.252254	0.075226	0.164522	1052	86.5019	118	38.75	242.25	Bacteria	Firmicutes	Clostridia	Lachnospirales	Lachnospiraceae	Lachnospiraceae ND3007 group	0.1 (-0.04, 0.25)
ZMGH1_adjusted	ASV2965	0.0314024	-0.0129955	0.0758004	0.0226258	0.165467	1052	2.09125	0	0	0	Bacteria	Firmicutes	Clostridia	Peptostreptococcales-Tissierellales	Family XI	Fenollaria	0.03 (-0.01, 0.08)
ZCEL_adjusted	ASV567	-0.101243	-0.24443	0.0419443	0.0729702	0.165603	1052	32.9848	0	0	13	Bacteria	Firmicutes	Clostridia	Lachnospirales	Lachnospiraceae	Shuttleworthia	-0.1 (-0.24, 0.04)
ZCML_adjusted	ASV176	-0.139746	-0.337711	0.0582196	0.100886	0.166295	1052	39.7338	0	0	56.25	Bacteria	Bacteroidota	Bacteroidia	Bacteroidales	Prevotellaceae	Paraprevotella	-0.14 (-0.34, 0.06)
ZCEL_adjusted	ASV701	-0.0658115	-0.160067	0.0284438	0.0480338	0.170952	1052	7.31939	0	0	0	Bacteria	Firmicutes	Clostridia	Lachnospirales	Lachnospiraceae	Frisingicoccus	-0.07 (-0.16, 0.03)
ZMGH1_adjusted	ASV80	-0.120855	-0.294781	0.0530721	0.0886355	0.173022	1052	79.1825	60	12	176.5	Bacteria	Firmicutes	Clostridia	Lachnospirales	Lachnospiraceae	Lachnospira	-0.12 (-0.29, 0.05)
ZCEL_adjusted	ASV538	0.083346	-0.0366511	0.203343	0.0611522	0.173203	1052	27.0913	0	0	4	Bacteria	Desulfobacterota	Desulfovibrionia	Desulfovibrionales	Desulfovibrionaceae	Bilophila	0.08 (-0.04, 0.2)
ZCML_adjusted	ASV387	0.0660626	-0.0298023	0.161927	0.0488541	0.176594	1052	5.13308	0	0	0	Bacteria	Proteobacteria	Gammaproteobacteria	Enterobacterales	Enterobacteriaceae	Klebsiella	0.07 (-0.03, 0.16)
ZCEL_adjusted	ASV229	-0.0770894	-0.18897	0.0347916	0.0570161	0.176652	1052	10.7414	0	0	0	Bacteria	Firmicutes	Bacilli	Lactobacillales	Enterococcaceae	Enterococcus	-0.08 (-0.19, 0.03)
ZMGH1_adjusted	ASV447	0.0363943	-0.0169594	0.0897481	0.0271898	0.18102	1052	1.3308	0	0	0	Bacteria	Proteobacteria	Gammaproteobacteria	Enterobacterales	Enterobacteriaceae	Enterobacter	0.04 (-0.02, 0.09)
ZCEL_adjusted	ASV1929	-0.0438474	-0.108319	0.0206243	0.0328557	0.18232	1052	4.65779	0	0	0	Bacteria	Firmicutes	Clostridia	Lachnospirales	Lachnospiraceae	Lachnospiraceae NK4B4 group	-0.04 (-0.11, 0.02)
ZCEL_adjusted	ASV283	0.10353	-0.049113	0.256173	0.077789	0.183514	1052	28.5171	0	0	14	Bacteria	Actinobacteriota	Coriobacteriia	Coriobacteriales	Eggerthellaceae	Senegalimassilia	0.1 (-0.05, 0.26)
ZMGH1_adjusted	ASV1630	-0.0289566	-0.0719631	0.0140499	0.0219167	0.186725	1052	1.14068	0	0	0	Bacteria	Bacteroidota	Bacteroidia	Bacteroidales	Rikenellaceae	Rikenella	-0.03 (-0.07, 0.01)
ZMGH1_adjusted	ASV1481	0.0519838	-0.0253596	0.129327	0.0394153	0.187504	1052	9.69582	0	0	0	Archaea	Euryarchaeota	Methanobacteria	Methanobacteriales	Methanobacteriaceae	Methanobrevibacter	0.05 (-0.03, 0.13)
ZCML_adjusted	ASV1396	0.0665389	-0.032845	0.165923	0.0506474	0.189217	1052	22.2433	0	0	0	Bacteria	Firmicutes	Bacilli	Erysipelotrichales	Erysipelotrichaceae	Holdemania	0.07 (-0.03, 0.17)
ZCEL_adjusted	ASV197	0.109098	-0.0539835	0.272179	0.0831084	0.189572	1052	25.4753	0	0	3	Bacteria	Firmicutes	Clostridia	Lachnospirales	Lachnospiraceae	Tyzzerella	0.11 (-0.05, 0.27)
ZMGH1_adjusted	ASV17	0.0757384	-0.0379908	0.189468	0.057958	0.191579	1052	96.0076	511.5	238.75	1024	Bacteria	Firmicutes	Clostridia	Lachnospirales	Lachnospiraceae	Coprococcus	0.08 (-0.04, 0.19)
ZMGH1_adjusted	ASV383	0.0699109	-0.0352201	0.175042	0.0535762	0.192223	1052	10.3612	0	0	0	Bacteria	Firmicutes	Clostridia	Lachnospirales	Lachnospiraceae	Hungatella	0.07 (-0.04, 0.18)
ZCML_adjusted	ASV503	-0.07443	-0.186683	0.0378227	0.0572055	0.193516	1052	10.4563	0	0	0	Bacteria	Firmicutes	Clostridia	Lachnospirales	Lachnospiraceae	Tuzzerella	-0.07 (-0.19, 0.04)
ZMGH1_adjusted	ASV176	-0.134777	-0.339679	0.0701264	0.104421	0.197098	1052	39.7338	0	0	56.25	Bacteria	Bacteroidota	Bacteroidia	Bacteroidales	Prevotellaceae	Paraprevotella	-0.13 (-0.34, 0.07)
ZCML_adjusted	ASV2101	-0.0523835	-0.132036	0.0272693	0.0405922	0.197173	1052	8.74525	0	0	0	Bacteria	Firmicutes	Clostridia	Lachnospirales	Lachnospiraceae	Catenibacillus	-0.05 (-0.13, 0.03)
ZCML_adjusted	ASV765	-0.032464	-0.0818876	0.0169596	0.025187	0.197715	1052	1.42586	0	0	0	Bacteria	Proteobacteria	Gammaproteobacteria	Enterobacterales	Enterobacteriaceae	Citrobacter	-0.03 (-0.08, 0.02)
ZCML_adjusted	ASV2915	0.0359551	-0.0192584	0.0911685	0.0281376	0.201597	1052	3.9924	0	0	0	Bacteria	Actinobacteriota	Actinobacteria	Actinomycetales	Actinomycetaceae	Actinomyces	0.04 (-0.02, 0.09)
ZMGH1_adjusted	ASV65	-0.119994	-0.305927	0.0659382	0.0947538	0.205663	1052	77.9468	82.5	12	260	Bacteria	Firmicutes	Clostridia	Lachnospirales	Lachnospiraceae	[Eubacterium] eligens group	-0.12 (-0.31, 0.07)
ZCEL_adjusted	ASV200	-0.0712124	-0.181978	0.0395527	0.0564475	0.207389	1052	91.1597	45	17	95	Bacteria	Firmicutes	Clostridia	Peptostreptococcales-Tissierellales	Anaerovoracaceae	Family XIII AD3011 group	-0.07 (-0.18, 0.04)
ZCML_adjusted	ASV1024	0.0630175	-0.0350757	0.161111	0.0499897	0.207735	1052	18.0608	0	0	0	Bacteria	Patescibacteria	Saccharimonadia	Saccharimonadales	Saccharimonadaceae	TM7x	0.06 (-0.04, 0.16)
ZCEL_adjusted	ASV65	-0.114265	-0.292201	0.0636704	0.0906784	0.207914	1052	77.9468	82.5	12	260	Bacteria	Firmicutes	Clostridia	Lachnospirales	Lachnospiraceae	[Eubacterium] eligens group	-0.11 (-0.29, 0.06)
ZMGH1_adjusted	ASV3537	0.0232421	-0.013175	0.0596593	0.0185587	0.210724	1052	1.3308	0	0	0	Bacteria	Firmicutes	Bacilli	Erysipelotrichales	Erysipelotrichaceae	Dielma	0.02 (-0.01, 0.06)
ZMGH1_adjusted	ASV161	-0.0721387	-0.18539	0.0411128	0.0577146	0.211612	1052	6.27376	0	0	0	Bacteria	Bacteroidota	Bacteroidia	Bacteroidales	Muribaculaceae	CAG-873	-0.07 (-0.19, 0.04)
ZMGH1_adjusted	ASV401	0.0997226	-0.0574991	0.256944	0.0801224	0.213551	1052	34.1255	0	0	9.25	Bacteria	Proteobacteria	Gammaproteobacteria	Burkholderiales	Sutterellaceae	Parasutterella	0.1 (-0.06, 0.26)
ZMGH1_adjusted	ASV765	-0.0323894	-0.0835416	0.0187629	0.0260679	0.214335	1052	1.42586	0	0	0	Bacteria	Proteobacteria	Gammaproteobacteria	Enterobacterales	Enterobacteriaceae	Citrobacter	-0.03 (-0.08, 0.02)
ZCEL_adjusted	ASV159	0.106303	-0.0620051	0.274612	0.0857723	0.215492	1052	30.7985	0	0	22	Bacteria	Actinobacteriota	Coriobacteriia	Coriobacteriales	Coriobacteriaceae	Collinsella	0.11 (-0.06, 0.27)
ZMGH1_adjusted	ASV200	-0.0728748	-0.188623	0.0428731	0.0589868	0.216947	1052	91.1597	45	17	95	Bacteria	Firmicutes	Clostridia	Peptostreptococcales-Tissierellales	Anaerovoracaceae	Family XIII AD3011 group	-0.07 (-0.19, 0.04)
ZMGH1_adjusted	ASV918	0.0490658	-0.0295373	0.127669	0.0400572	0.220896	1052	6.36882	0	0	0	Bacteria	Firmicutes	Bacilli	Lactobacillales	Lactobacillaceae	Lacticaseibacillus	0.05 (-0.03, 0.13)
ZMGH1_adjusted	ASV102	-0.134956	-0.351347	0.0814358	0.110276	0.221308	1052	43.6312	0	0	100.25	Bacteria	Firmicutes	Negativicutes	Acidaminococcales	Acidaminococcaceae	Phascolarctobacterium	-0.13 (-0.35, 0.08)
ZMGH1_adjusted	ASV56	0.0892196	-0.0539338	0.232373	0.072953	0.221619	1052	92.0152	164.5	43.75	455.25	Bacteria	Bacteroidota	Bacteroidia	Bacteroidales	Rikenellaceae	Alistipes	0.09 (-0.05, 0.23)
ZCEL_adjusted	ASV383	0.0627079	-0.0379106	0.163326	0.0512766	0.221635	1052	10.3612	0	0	0	Bacteria	Firmicutes	Clostridia	Lachnospirales	Lachnospiraceae	Hungatella	0.06 (-0.04, 0.16)
ZCEL_adjusted	ASV1630	-0.0256253	-0.0667868	0.0155362	0.0209765	0.222131	1052	1.14068	0	0	0	Bacteria	Bacteroidota	Bacteroidia	Bacteroidales	Rikenellaceae	Rikenella	-0.03 (-0.07, 0.02)
ZCML_adjusted	ASV98	0.108611	-0.0658557	0.283078	0.0889108	0.222148	1052	21.673	0	0	0	Bacteria	Firmicutes	Clostridia	Lachnospirales	Lachnospiraceae	[Ruminococcus] gnavus group	0.11 (-0.07, 0.28)
ZCEL_adjusted	ASV113	-0.107421	-0.280842	0.065999	0.0883775	0.22446	1052	63.5932	25	0	90	Bacteria	Firmicutes	Clostridia	Lachnospirales	Lachnospiraceae	[Eubacterium] xylanophilum group	-0.11 (-0.28, 0.07)
ZCEL_adjusted	ASV176	-0.120318	-0.316427	0.0757908	0.0999398	0.228903	1052	39.7338	0	0	56.25	Bacteria	Bacteroidota	Bacteroidia	Bacteroidales	Prevotellaceae	Paraprevotella	-0.12 (-0.32, 0.08)
ZCEL_adjusted	ASV80	-0.102045	-0.268523	0.0644334	0.0848395	0.229332	1052	79.1825	60	12	176.5	Bacteria	Firmicutes	Clostridia	Lachnospirales	Lachnospiraceae	Lachnospira	-0.1 (-0.27, 0.06)
ZMGH1_adjusted	ASV2160	0.0380178	-0.0250888	0.101124	0.03216	0.237421	1052	6.65399	0	0	0	Bacteria	Firmicutes	Clostridia	Oscillospirales	Ruminococcaceae	Phocea	0.04 (-0.03, 0.1)
ZCML_adjusted	ASV403	0.0520717	-0.0344768	0.13862	0.0441063	0.238036	1052	6.17871	0	0	0	Bacteria	Firmicutes	Bacilli	Lactobacillales	Lactobacillaceae	Limosilactobacillus	0.05 (-0.03, 0.14)
ZCEL_adjusted	ASV94	-0.0858237	-0.229171	0.0575239	0.0730519	0.240334	1052	86.1217	72	20	155.25	Bacteria	Firmicutes	Clostridia	Lachnospirales	Lachnospiraceae	[Eubacterium] ventriosum group	-0.09 (-0.23, 0.06)
ZMGH1_adjusted	ASV77	-0.0593699	-0.158578	0.0398385	0.050558	0.240549	1052	95.6274	79.5	36	156.25	Bacteria	Firmicutes	Clostridia	Oscillospirales	Ruminococcaceae	Incertae Sedis	-0.06 (-0.16, 0.04)
ZCML_adjusted	ASV2874	0.0334013	-0.0224525	0.0892551	0.0284639	0.240881	1052	4.37262	0	0	0	Bacteria	Firmicutes	Clostridia	Oscillospirales	Ruminococcaceae	Pygmaiobacter	0.03 (-0.02, 0.09)
ZCML_adjusted	ASV341	-0.0265665	-0.0712523	0.0181193	0.0227725	0.243641	1052	0.95057	0	0	0	Bacteria	Bacteroidota	Bacteroidia	Bacteroidales	Rikenellaceae	Rikenellaceae RC9 gut group	-0.03 (-0.07, 0.02)
ZCEL_adjusted	ASV32	0.109432	-0.0748807	0.293746	0.0939285	0.244264	1052	80.7034	77	13	345.25	Bacteria	Firmicutes	Bacilli	Lactobacillales	Streptococcaceae	Streptococcus	0.11 (-0.07, 0.29)
ZCML_adjusted	ASV1329	0.0289716	-0.0199002	0.0778434	0.0249057	0.244998	1052	1.80608	0	0	0	Bacteria	Firmicutes	Bacilli	Lactobacillales	Lactobacillaceae	Pediococcus	0.03 (-0.02, 0.08)
ZCML_adjusted	ASV208	0.0896829	-0.0617618	0.241128	0.0771784	0.245496	1052	21.5779	0	0	0	Bacteria	Firmicutes	Bacilli	Lactobacillales	Lactobacillaceae	Lactobacillus	0.09 (-0.06, 0.24)
ZCML_adjusted	ASV229	-0.0666365	-0.179629	0.0463563	0.0575827	0.247446	1052	10.7414	0	0	0	Bacteria	Firmicutes	Bacilli	Lactobacillales	Enterococcaceae	Enterococcus	-0.07 (-0.18, 0.05)
ZCEL_adjusted	ASV7	0.0741846	-0.0516933	0.200062	0.0641491	0.24777	1052	94.3916	435	192.75	841.25	Bacteria	Firmicutes	Clostridia	Lachnospirales	Lachnospiraceae	Fusicatenibacter	0.07 (-0.05, 0.2)
ZCML_adjusted	ASV3	0.140414	-0.0981963	0.379024	0.121599	0.24847	1052	68.346	68.5	0	599	Bacteria	Proteobacteria	Gammaproteobacteria	Enterobacterales	Enterobacteriaceae	Escherichia-Shigella	0.14 (-0.1, 0.38)
ZCEL_adjusted	ASV554	-0.0508866	-0.137475	0.0357017	0.0441266	0.249098	1052	5.03802	0	0	0	Bacteria	Firmicutes	Clostridia	Lachnospirales	Lachnospiraceae	[Bacteroides] pectinophilus group	-0.05 (-0.14, 0.04)
ZCEL_adjusted	ASV665	0.0795235	-0.0562673	0.215314	0.0692009	0.250753	1052	22.8137	0	0	0	Bacteria	Actinobacteriota	Coriobacteriia	Coriobacteriales	Eggerthellaceae	Adlercreutzia	0.08 (-0.06, 0.22)
ZCML_adjusted	ASV93	0.080694	-0.0579457	0.219334	0.0706527	0.253669	1052	90.7795	143.5	48	318	Bacteria	Firmicutes	Clostridia	Lachnospirales	Lachnospiraceae	Lachnoclostridium	0.08 (-0.06, 0.22)
ZCEL_adjusted	ASV1396	-0.0571858	-0.155636	0.0412639	0.0501714	0.25463	1052	22.2433	0	0	0	Bacteria	Firmicutes	Bacilli	Erysipelotrichales	Erysipelotrichaceae	Holdemania	-0.06 (-0.16, 0.04)
ZCML_adjusted	ASV82	0.14188	-0.103145	0.386904	0.124868	0.256121	1052	36.4068	0	0	177	Bacteria	Bacteroidota	Bacteroidia	Bacteroidales	Prevotellaceae	Prevotella_9	0.14 (-0.1, 0.39)
ZMGH1_adjusted	ASV930	-0.0491479	-0.13503	0.0367344	0.0437668	0.261721	1052	10.076	0	0	0	Bacteria	Firmicutes	Clostridia	Lachnospirales	Lachnospiraceae	[Eubacterium] fissicatena group	-0.05 (-0.14, 0.04)
ZCML_adjusted	ASV2651	-0.0255185	-0.0702119	0.0191748	0.0227764	0.262807	1052	1.90114	0	0	0	Bacteria	Firmicutes	Clostridia	Lachnospirales	Lachnospiraceae	Lactonifactor	-0.03 (-0.07, 0.02)
ZCEL_adjusted	ASV481	-0.0512699	-0.141111	0.0385716	0.0457845	0.263056	1052	6.46388	0	0	0	Bacteria	Firmicutes	Bacilli	Erysipelotrichales	Erysipelotrichaceae	Solobacterium	-0.05 (-0.14, 0.04)
ZCML_adjusted	ASV930	-0.0469959	-0.129982	0.03599	0.0422908	0.266717	1052	10.076	0	0	0	Bacteria	Firmicutes	Clostridia	Lachnospirales	Lachnospiraceae	[Eubacterium] fissicatena group	-0.05 (-0.13, 0.04)
ZCEL_adjusted	ASV434	0.0748726	-0.0597103	0.209456	0.0685854	0.275233	1052	24.5247	0	0	0	Bacteria	Firmicutes	Clostridia	Oscillospirales	Oscillospiraceae	Flavonifractor	0.07 (-0.06, 0.21)
ZCEL_adjusted	ASV1551	0.0505603	-0.0407473	0.141868	0.0465316	0.277477	1052	9.03042	0	0	0	Bacteria	Actinobacteriota	Coriobacteriia	Coriobacteriales	Atopobiaceae	Olsenella	0.05 (-0.04, 0.14)
ZCML_adjusted	ASV1368	0.0509807	-0.041115	0.143076	0.0469333	0.277627	1052	18.8213	0	0	0	Bacteria	Firmicutes	Clostridia	Oscillospirales	Ruminococcaceae	Candidatus Soleaferrea	0.05 (-0.04, 0.14)
ZMGH1_adjusted	ASV166	0.0847997	-0.0685647	0.238164	0.0781567	0.278177	1052	13.308	0	0	0	Bacteria	Firmicutes	Bacilli	Erysipelotrichales	Erysipelatoclostridiaceae	Catenibacterium	0.08 (-0.07, 0.24)
ZCML_adjusted	ASV283	0.0850619	-0.069106	0.23923	0.0785661	0.279204	1052	28.5171	0	0	14	Bacteria	Actinobacteriota	Coriobacteriia	Coriobacteriales	Eggerthellaceae	Senegalimassilia	0.09 (-0.07, 0.24)
ZCEL_adjusted	ASV242	0.0903756	-0.074983	0.255734	0.084269	0.283762	1052	40.3992	0	0	21	Bacteria	Firmicutes	Clostridia	Lachnospirales	Lachnospiraceae	Lachnospiraceae UCG-010	0.09 (-0.07, 0.26)
ZMGH1_adjusted	ASV1415	-0.0534081	-0.151555	0.044739	0.0500171	0.285863	1052	14.3536	0	0	0	Bacteria	Firmicutes	Bacilli	Erysipelotrichales	Erysipelotrichaceae	Merdibacter	-0.05 (-0.15, 0.04)
ZMGH1_adjusted	ASV82	0.137093	-0.116507	0.390694	0.129238	0.289038	1052	36.4068	0	0	177	Bacteria	Bacteroidota	Bacteroidia	Bacteroidales	Prevotellaceae	Prevotella_9	0.14 (-0.12, 0.39)
ZCML_adjusted	ASV1195	0.0496146	-0.0421678	0.141397	0.0467736	0.289057	1052	15.9696	0	0	0	Bacteria	Firmicutes	Clostridia	Oscillospirales	Oscillospiraceae	UCG-007	0.05 (-0.04, 0.14)
ZCML_adjusted	ASV33	-0.115962	-0.333968	0.102043	0.111099	0.296832	1052	49.9049	0	0	145.25	Bacteria	Firmicutes	Clostridia	Peptostreptococcales-Tissierellales	Peptostreptococcaceae	Intestinibacter	-0.12 (-0.33, 0.1)
ZMGH1_adjusted	ASV1020	0.0219467	-0.0193769	0.0632702	0.0210591	0.297587	1052	1.04563	0	0	0	Bacteria	Firmicutes	Bacilli	Lactobacillales	Lactobacillaceae	HT002	0.02 (-0.02, 0.06)
ZMGH1_adjusted	ASV2	0.0679028	-0.0606851	0.196491	0.0655302	0.300349	1052	95.8175	859.5	385	1711.75	Bacteria	Firmicutes	Clostridia	Lachnospirales	Lachnospiraceae	Agathobacter	0.07 (-0.06, 0.2)
ZCEL_adjusted	ASV42	-0.103295	-0.300755	0.0941647	0.100628	0.304896	1052	71.9582	57	0	302	Bacteria	Firmicutes	Clostridia	Clostridiales	Clostridiaceae	Clostridium sensu stricto 1	-0.1 (-0.3, 0.09)
ZMGH1_adjusted	ASV42	-0.107703	-0.31404	0.0986332	0.105152	0.305952	1052	71.9582	57	0	302	Bacteria	Firmicutes	Clostridia	Clostridiales	Clostridiaceae	Clostridium sensu stricto 1	-0.11 (-0.31, 0.1)
ZCML_adjusted	ASV67	-0.0616237	-0.180348	0.0571006	0.0605036	0.308673	1052	92.2053	75	29	141.25	Bacteria	Firmicutes	Clostridia	Monoglobales	Monoglobaceae	Monoglobus	-0.06 (-0.18, 0.06)
ZMGH1_adjusted	ASV567	-0.0775386	-0.227227	0.0721499	0.0762833	0.309651	1052	32.9848	0	0	13	Bacteria	Firmicutes	Clostridia	Lachnospirales	Lachnospiraceae	Shuttleworthia	-0.08 (-0.23, 0.07)
ZMGH1_adjusted	ASV39	0.0798882	-0.0744285	0.234205	0.0786419	0.30994	1052	86.5019	118	38.75	242.25	Bacteria	Firmicutes	Clostridia	Lachnospirales	Lachnospiraceae	Lachnospiraceae ND3007 group	0.08 (-0.07, 0.23)
ZMGH1_adjusted	ASV1534	-0.0523243	-0.153552	0.0489038	0.0515873	0.310684	1052	20.057	0	0	0	Bacteria	Firmicutes	Clostridia	Oscillospirales	Butyricicoccaceae	UCG-009	-0.05 (-0.15, 0.05)
ZCEL_adjusted	ASV765	-0.0252197	-0.0741838	0.0237445	0.0249528	0.3124	1052	1.42586	0	0	0	Bacteria	Proteobacteria	Gammaproteobacteria	Enterobacterales	Enterobacteriaceae	Citrobacter	-0.03 (-0.07, 0.02)
ZMGH1_adjusted	ASV193	0.0877905	-0.0834034	0.258984	0.0872428	0.314518	1052	50.3802	5	0	38	Bacteria	Firmicutes	Clostridia	Oscillospirales	Oscillospiraceae	UCG-003	0.09 (-0.08, 0.26)
ZCML_adjusted	ASV1204	0.040841	-0.0389909	0.120673	0.0406834	0.315676	1052	5.98859	0	0	0	Bacteria	Firmicutes	Clostridia	Lachnospirales	Lachnospiraceae	FD2005	0.04 (-0.04, 0.12)
ZMGH1_adjusted	ASV4620	0.0198024	-0.0189981	0.058603	0.0197733	0.316833	1052	1.61597	0	0	0	Bacteria	Firmicutes	Clostridia	Peptostreptococcales-Tissierellales	Family XI	Finegoldia	0.02 (-0.02, 0.06)
ZCEL_adjusted	ASV1513	0.0344072	-0.0331684	0.101983	0.0344374	0.317971	1052	4.37262	0	0	0	Bacteria	Firmicutes	Bacilli	Erysipelotrichales	Erysipelotrichaceae	Faecalitalea	0.03 (-0.03, 0.1)
ZCEL_adjusted	ASV1015	0.0427096	-0.0416166	0.127036	0.0429738	0.320528	1052	9.79087	0	0	0	Bacteria	Firmicutes	Clostridia	Peptostreptococcales-Tissierellales	Anaerovoracaceae	Mogibacterium	0.04 (-0.04, 0.13)
ZCML_adjusted	ASV76	-0.0979868	-0.291624	0.0956507	0.0986804	0.320957	1052	49.4297	0	0	57.25	Bacteria	Verrucomicrobiota	Verrucomicrobiae	Verrucomicrobiales	Akkermansiaceae	Akkermansia	-0.1 (-0.29, 0.1)
ZCEL_adjusted	ASV918	0.0379767	-0.037264	0.113217	0.0383437	0.322198	1052	6.36882	0	0	0	Bacteria	Firmicutes	Bacilli	Lactobacillales	Lactobacillaceae	Lacticaseibacillus	0.04 (-0.04, 0.11)
ZCML_adjusted	ASV8	-0.0551941	-0.164641	0.0542528	0.0557756	0.322615	1052	96.673	653.5	319.75	1284.75	Bacteria	Firmicutes	Clostridia	Oscillospirales	Ruminococcaceae	Subdoligranulum	-0.06 (-0.16, 0.05)
ZCEL_adjusted	ASV71	0.0821434	-0.0809551	0.245242	0.0831173	0.323246	1052	80.3232	61	9	180.25	Bacteria	Bacteroidota	Bacteroidia	Bacteroidales	Tannerellaceae	Parabacteroides	0.08 (-0.08, 0.25)
ZMGH1_adjusted	ASV2005	-0.0222781	-0.0665303	0.0219741	0.0225515	0.323446	1052	1.3308	0	0	0	Bacteria	Proteobacteria	Gammaproteobacteria	Enterobacterales	Succinivibrionaceae	Succinivibrio	-0.02 (-0.07, 0.02)
ZCML_adjusted	ASV554	-0.0439644	-0.131408	0.0434787	0.0445622	0.324078	1052	5.03802	0	0	0	Bacteria	Firmicutes	Clostridia	Lachnospirales	Lachnospiraceae	[Bacteroides] pectinophilus group	-0.04 (-0.13, 0.04)
ZMGH1_adjusted	ASV446	-0.069704	-0.208499	0.0690912	0.070732	0.324627	1052	20.1521	0	0	0	Bacteria	Actinobacteriota	Coriobacteriia	Coriobacteriales	Eggerthellaceae	Enterorhabdus	-0.07 (-0.21, 0.07)
ZMGH1_adjusted	ASV3333	0.020825	-0.0207556	0.0624055	0.02119	0.325951	1052	1.90114	0	0	0	Bacteria	Firmicutes	Clostridia	Lachnospirales	Lachnospiraceae	CHKCI001	0.02 (-0.02, 0.06)
ZMGH1_adjusted	ASV286	0.0799733	-0.081124	0.241071	0.0820974	0.330222	1052	26.9962	0	0	13	Bacteria	Firmicutes	Clostridia	Lachnospirales	Lachnospiraceae	Howardella	0.08 (-0.08, 0.24)
ZCEL_adjusted	ASV489	-0.0739551	-0.223053	0.0751431	0.0759825	0.330624	1052	37.4525	0	0	12	Bacteria	Firmicutes	Bacilli	Erysipelotrichales	Erysipelatoclostridiaceae	Erysipelatoclostridium	-0.07 (-0.22, 0.08)
ZCEL_adjusted	ASV2	0.0610382	-0.0620257	0.184102	0.062715	0.330652	1052	95.8175	859.5	385	1711.75	Bacteria	Firmicutes	Clostridia	Lachnospirales	Lachnospiraceae	Agathobacter	0.06 (-0.06, 0.18)
ZMGH1_adjusted	ASV26	-0.0755354	-0.229221	0.07815	0.0783203	0.33505	1052	90.5894	335	104.75	814.25	Bacteria	Firmicutes	Clostridia	Oscillospirales	Oscillospiraceae	UCG-002	-0.08 (-0.23, 0.08)
ZCEL_adjusted	ASV177	-0.0445506	-0.135481	0.0463796	0.0463393	0.336577	1052	4.18251	0	0	0	Bacteria	Firmicutes	Negativicutes	Acidaminococcales	Acidaminococcaceae	Succiniclasticum	-0.04 (-0.14, 0.05)
ZCEL_adjusted	ASV726	0.0523608	-0.0547398	0.159462	0.05458	0.337612	1052	22.4335	0	0	0	Bacteria	Bacteroidota	Bacteroidia	Bacteroidales	Barnesiellaceae	Coprobacter	0.05 (-0.05, 0.16)
ZCEL_adjusted	ASV26	-0.0718302	-0.218905	0.0752448	0.0749515	0.338108	1052	90.5894	335	104.75	814.25	Bacteria	Firmicutes	Clostridia	Oscillospirales	Oscillospiraceae	UCG-002	-0.07 (-0.22, 0.08)
ZCML_adjusted	ASV1015	0.0415748	-0.043572	0.126722	0.043392	0.338227	1052	9.79087	0	0	0	Bacteria	Firmicutes	Clostridia	Peptostreptococcales-Tissierellales	Anaerovoracaceae	Mogibacterium	0.04 (-0.04, 0.13)
ZCEL_adjusted	ASV76	-0.0936316	-0.285416	0.0981526	0.0977359	0.338284	1052	49.4297	0	0	57.25	Bacteria	Verrucomicrobiota	Verrucomicrobiae	Verrucomicrobiales	Akkermansiaceae	Akkermansia	-0.09 (-0.29, 0.1)
ZCEL_adjusted	ASV1568	0.0480148	-0.0509715	0.147001	0.0504448	0.341407	1052	19.2966	0	0	0	Bacteria	Firmicutes	Clostridia	Oscillospirales	Ruminococcaceae	Anaerotruncus	0.05 (-0.05, 0.15)
ZCML_adjusted	ASV422	-0.0543818	-0.1671	0.0583366	0.0574429	0.344008	1052	10.4563	0	0	0	Bacteria	Firmicutes	Negativicutes	Acidaminococcales	Acidaminococcaceae	Acidaminococcus	-0.05 (-0.17, 0.06)
ZCEL_adjusted	ASV1415	-0.0451292	-0.139066	0.0488072	0.0478713	0.346045	1052	14.3536	0	0	0	Bacteria	Firmicutes	Bacilli	Erysipelotrichales	Erysipelotrichaceae	Merdibacter	-0.05 (-0.14, 0.05)
ZCEL_adjusted	ASV2915	0.026156	-0.0285471	0.0808592	0.0278775	0.348336	1052	3.9924	0	0	0	Bacteria	Actinobacteriota	Actinobacteria	Actinomycetales	Actinomycetaceae	Actinomyces	0.03 (-0.03, 0.08)
ZMGH1_adjusted	ASV1329	0.023889	-0.0267014	0.0744794	0.0257816	0.354355	1052	1.80608	0	0	0	Bacteria	Firmicutes	Bacilli	Lactobacillales	Lactobacillaceae	Pediococcus	0.02 (-0.03, 0.07)
ZCEL_adjusted	ASV3864	0.017114	-0.0194069	0.0536349	0.0186116	0.35803	1052	1.23574	0	0	0	Bacteria	Actinobacteriota	Actinobacteria	Micrococcales	Micrococcaceae	Rothia	0.02 (-0.02, 0.05)
ZCML_adjusted	ASV16	-0.0898197	-0.281578	0.101939	0.0977228	0.358244	1052	78.0418	110	11	344.25	Bacteria	Firmicutes	Clostridia	Peptostreptococcales-Tissierellales	Peptostreptococcaceae	Romboutsia	-0.09 (-0.28, 0.1)
ZCML_adjusted	ASV430	0.0637231	-0.0731024	0.200549	0.0697282	0.360995	1052	34.7909	0	0	14	Bacteria	Firmicutes	Clostridia	Lachnospirales	Lachnospiraceae	GCA-900066575	0.06 (-0.07, 0.2)
ZCEL_adjusted	ASV56	0.0637022	-0.0733371	0.200741	0.0698371	0.361901	1052	92.0152	164.5	43.75	455.25	Bacteria	Bacteroidota	Bacteroidia	Bacteroidales	Rikenellaceae	Alistipes	0.06 (-0.07, 0.2)
ZCML_adjusted	ASV330	-0.0544147	-0.171616	0.0627868	0.0597275	0.362483	1052	10.6464	0	0	0	Bacteria	Bacteroidota	Bacteroidia	Bacteroidales	Prevotellaceae	Prevotella_7	-0.05 (-0.17, 0.06)
ZCEL_adjusted	ASV1534	-0.0447374	-0.141621	0.0521458	0.049373	0.36509	1052	20.057	0	0	0	Bacteria	Firmicutes	Clostridia	Oscillospirales	Butyricicoccaceae	UCG-009	-0.04 (-0.14, 0.05)
ZCEL_adjusted	ASV264	0.0538581	-0.0630169	0.170733	0.0595611	0.366075	1052	7.22433	0	0	0	Bacteria	Bacteroidota	Bacteroidia	Bacteroidales	Prevotellaceae	Prevotellaceae NK3B31 group	0.05 (-0.06, 0.17)
ZCML_adjusted	ASV447	0.0237462	-0.0278319	0.0753243	0.0262849	0.366517	1052	1.3308	0	0	0	Bacteria	Proteobacteria	Gammaproteobacteria	Enterobacterales	Enterobacteriaceae	Enterobacter	0.02 (-0.03, 0.08)
ZCML_adjusted	ASV2005	0.0196364	-0.0231262	0.062399	0.0217924	0.367764	1052	1.3308	0	0	0	Bacteria	Proteobacteria	Gammaproteobacteria	Enterobacterales	Succinivibrionaceae	Succinivibrio	0.02 (-0.02, 0.06)
ZMGH1_adjusted	ASV1513	0.0323919	-0.0382278	0.103012	0.0359888	0.368301	1052	4.37262	0	0	0	Bacteria	Firmicutes	Bacilli	Erysipelotrichales	Erysipelotrichaceae	Faecalitalea	0.03 (-0.04, 0.1)
ZCML_adjusted	ASV146	0.0840305	-0.0993425	0.267404	0.0934494	0.368752	1052	46.8631	0	0	40	Bacteria	Firmicutes	Bacilli	Erysipelotrichales	Erysipelotrichaceae	Turicibacter	0.08 (-0.1, 0.27)
ZCEL_adjusted	ASV98	0.0791938	-0.0936548	0.252042	0.0880861	0.368836	1052	21.673	0	0	0	Bacteria	Firmicutes	Clostridia	Lachnospirales	Lachnospiraceae	[Ruminococcus] gnavus group	0.08 (-0.09, 0.25)
ZCML_adjusted	ASV706	0.0638371	-0.0758673	0.203542	0.0711953	0.370117	1052	29.8479	0	0	11	Bacteria	Firmicutes	Clostridia	Oscillospirales	Oscillospiraceae	Oscillospira	0.06 (-0.08, 0.2)
ZMGH1_adjusted	ASV640	0.0305833	-0.0366285	0.097795	0.0342521	0.372126	1052	2.6616	0	0	0	Bacteria	Firmicutes	Clostridia	Lachnospirales	Lachnospiraceae	Lachnospiraceae UCG-007	0.03 (-0.04, 0.1)
ZCEL_adjusted	ASV1329	0.021905	-0.0265107	0.0703207	0.0246733	0.374855	1052	1.80608	0	0	0	Bacteria	Firmicutes	Bacilli	Lactobacillales	Lactobacillaceae	Pediococcus	0.02 (-0.03, 0.07)
ZCML_adjusted	ASV2040	-0.0301249	-0.0970294	0.0367797	0.0340955	0.377149	1052	9.31559	0	0	0	Bacteria	Firmicutes	Clostridia	Eubacteriales	Anaerofustaceae	Anaerofustis	-0.03 (-0.1, 0.04)
ZCEL_adjusted	ASV246	-0.0634372	-0.204782	0.0779074	0.0720312	0.378691	1052	22.7186	0	0	0	Bacteria	Firmicutes	Clostridia	Lachnospirales	Lachnospiraceae	Lachnospiraceae AC2044 group	-0.06 (-0.2, 0.08)
ZCEL_adjusted	ASV3537	0.0156103	-0.0192537	0.0504743	0.0177672	0.379822	1052	1.3308	0	0	0	Bacteria	Firmicutes	Bacilli	Erysipelotrichales	Erysipelotrichaceae	Dielma	0.02 (-0.02, 0.05)
ZCEL_adjusted	ASV294	0.0582358	-0.0719788	0.18845	0.0663592	0.380374	1052	11.7871	0	0	0	Bacteria	Bacteroidota	Bacteroidia	Bacteroidales	Prevotellaceae	Alloprevotella	0.06 (-0.07, 0.19)
ZCML_adjusted	ASV5	-0.0445693	-0.14488	0.055741	0.0511195	0.383485	1052	98.0989	1220	506.25	2536.5	Bacteria	Firmicutes	Clostridia	Oscillospirales	Ruminococcaceae	Faecalibacterium	-0.04 (-0.14, 0.06)
ZMGH1_adjusted	ASV294	0.0599447	-0.0761248	0.196014	0.0693429	0.387532	1052	11.7871	0	0	0	Bacteria	Bacteroidota	Bacteroidia	Bacteroidales	Prevotellaceae	Alloprevotella	0.06 (-0.08, 0.2)
ZCML_adjusted	ASV1268	-0.0273349	-0.0894017	0.0347319	0.0316301	0.387676	1052	4.37262	0	0	0	Bacteria	Synergistota	Synergistia	Synergistales	Synergistaceae	Cloacibacillus	-0.03 (-0.09, 0.03)
ZCML_adjusted	ASV369	-0.0712156	-0.232954	0.0905226	0.082424	0.387781	1052	42.2053	0	0	22	Bacteria	Firmicutes	Clostridia	Oscillospirales	Ruminococcaceae	Negativibacillus	-0.07 (-0.23, 0.09)
ZCEL_adjusted	ASV89	0.0838338	-0.107694	0.275362	0.0976052	0.390591	1052	54.8479	21	0	98.25	Bacteria	Firmicutes	Clostridia	Lachnospirales	Lachnospiraceae	CAG-56	0.08 (-0.11, 0.28)
ZCEL_adjusted	ASV47	-0.0748944	-0.24721	0.0974206	0.0878142	0.393927	1052	17.4905	0	0	0	Bacteria	Firmicutes	Clostridia	Lachnospirales	Lachnospiraceae	Butyrivibrio	-0.07 (-0.25, 0.1)
ZCEL_adjusted	ASV1020	0.0171853	-0.0223675	0.056738	0.0201566	0.394088	1052	1.04563	0	0	0	Bacteria	Firmicutes	Bacilli	Lactobacillales	Lactobacillaceae	HT002	0.02 (-0.02, 0.06)
ZCML_adjusted	ASV715	-0.0233936	-0.0772441	0.0304568	0.0274429	0.394164	1052	1.52091	0	0	0	Bacteria	Proteobacteria	Gammaproteobacteria	Enterobacterales	Hafniaceae	Hafnia-Obesumbacterium	-0.02 (-0.08, 0.03)
ZCML_adjusted	ASV3333	0.0173992	-0.0227832	0.0575817	0.0204775	0.395703	1052	1.90114	0	0	0	Bacteria	Firmicutes	Clostridia	Lachnospirales	Lachnospiraceae	CHKCI001	0.02 (-0.02, 0.06)
ZCML_adjusted	ASV2250	0.0226613	-0.0297219	0.0750446	0.0266952	0.396139	1052	4.08745	0	0	0	Bacteria	Firmicutes	Bacilli	Lactobacillales	Carnobacteriaceae	Granulicatella	0.02 (-0.03, 0.08)
ZCML_adjusted	ASV768	0.0548464	-0.0721602	0.181853	0.0647243	0.396978	1052	25.9506	0	0	4	Bacteria	Bacteroidota	Bacteroidia	Bacteroidales	Marinifilaceae	Butyricimonas	0.05 (-0.07, 0.18)
ZMGH1_adjusted	ASV1128	-0.0292348	-0.0971933	0.0387236	0.0346326	0.398785	1052	3.04183	0	0	0	Bacteria	Bacteroidota	Bacteroidia	Bacteroidales	Prevotellaceae	Prevotella	-0.03 (-0.1, 0.04)
ZCML_adjusted	ASV196	0.0530938	-0.0727482	0.178936	0.0641308	0.40792	1052	9.88593	0	0	0	Bacteria	Firmicutes	Bacilli	Lactobacillales	Lactobacillaceae	Ligilactobacillus	0.05 (-0.07, 0.18)
ZMGH1_adjusted	ASV1195	0.040003	-0.0550046	0.135011	0.0484172	0.408873	1052	15.9696	0	0	0	Bacteria	Firmicutes	Clostridia	Oscillospirales	Oscillospiraceae	UCG-007	0.04 (-0.06, 0.14)
ZCEL_adjusted	ASV2119	0.0291578	-0.0401522	0.0984678	0.0353213	0.409278	1052	9.5057	0	0	0	Bacteria	Firmicutes	Clostridia	Christensenellales	Christensenellaceae	Christensenella	0.03 (-0.04, 0.1)
ZCML_adjusted	ASV1176	-0.0288489	-0.0978059	0.0401081	0.0351414	0.411872	1052	5.89354	0	0	0	Bacteria	Firmicutes	Clostridia	Peptostreptococcales-Tissierellales	Anaerovoracaceae	[Eubacterium] nodatum group	-0.03 (-0.1, 0.04)
ZMGH1_adjusted	ASV2101	-0.0343889	-0.116863	0.0480849	0.0420298	0.41343	1052	8.74525	0	0	0	Bacteria	Firmicutes	Clostridia	Lachnospirales	Lachnospiraceae	Catenibacillus	-0.03 (-0.12, 0.05)
ZCEL_adjusted	ASV4217	-0.0159414	-0.0542751	0.0223923	0.0195354	0.414673	1052	2.18631	0	0	0	Bacteria	Actinobacteriota	Coriobacteriia	Coriobacteriales	Atopobiaceae	Atopobium	-0.02 (-0.05, 0.02)
ZMGH1_adjusted	ASV273	-0.0665598	-0.228146	0.0950267	0.0823467	0.419112	1052	65.8745	16	0	40	Bacteria	Firmicutes	Clostridia	Peptostreptococcales-Tissierellales	Anaerovoracaceae	Family XIII UCG-001	-0.07 (-0.23, 0.1)
ZCEL_adjusted	ASV401	0.0615076	-0.0890168	0.212032	0.0767094	0.422838	1052	34.1255	0	0	9.25	Bacteria	Proteobacteria	Gammaproteobacteria	Burkholderiales	Sutterellaceae	Parasutterella	0.06 (-0.09, 0.21)
ZMGH1_adjusted	ASV1396	-0.0418011	-0.14471	0.0611073	0.0524436	0.425595	1052	22.2433	0	0	0	Bacteria	Firmicutes	Bacilli	Erysipelotrichales	Erysipelotrichaceae	Holdemania	-0.04 (-0.14, 0.06)
ZMGH1_adjusted	ASV181	-0.0719847	-0.250515	0.106546	0.0909815	0.429009	1052	65.8745	29	0	82	Bacteria	Firmicutes	Clostridia	Lachnospirales	Lachnospiraceae	Marvinbryantia	-0.07 (-0.25, 0.11)
ZMGH1_adjusted	ASV303	-0.0688857	-0.240098	0.102327	0.0872523	0.430001	1052	29.943	0	0	17	Bacteria	Desulfobacterota	Desulfovibrionia	Desulfovibrionales	Desulfovibrionaceae	Desulfovibrio	-0.07 (-0.24, 0.1)
ZCML_adjusted	ASV489	0.0598954	-0.0906732	0.210464	0.0767319	0.435228	1052	37.4525	0	0	12	Bacteria	Firmicutes	Bacilli	Erysipelotrichales	Erysipelatoclostridiaceae	Erysipelatoclostridium	0.06 (-0.09, 0.21)
ZMGH1_adjusted	ASV1551	0.03753	-0.0579092	0.132969	0.0486371	0.44051	1052	9.03042	0	0	0	Bacteria	Actinobacteriota	Coriobacteriia	Coriobacteriales	Atopobiaceae	Olsenella	0.04 (-0.06, 0.13)
ZCEL_adjusted	ASV355	0.0625408	-0.0982063	0.223288	0.081919	0.445371	1052	36.8821	0	0	18	Bacteria	Proteobacteria	Gammaproteobacteria	Burkholderiales	Sutterellaceae	Sutterella	0.06 (-0.1, 0.22)
ZCEL_adjusted	ASV286	0.0598815	-0.0943132	0.214076	0.0785798	0.446206	1052	26.9962	0	0	13	Bacteria	Firmicutes	Clostridia	Lachnospirales	Lachnospiraceae	Howardella	0.06 (-0.09, 0.21)
ZMGH1_adjusted	ASV1762	-0.02256	-0.0808098	0.0356898	0.0296849	0.447439	1052	3.13688	0	0	0	Bacteria	Firmicutes	Clostridia	Oscillospirales	Hungateiclostridiaceae	Ruminiclostridium	-0.02 (-0.08, 0.04)
ZMGH1_adjusted	ASV715	-0.0212987	-0.0770338	0.0344365	0.0284034	0.453508	1052	1.52091	0	0	0	Bacteria	Proteobacteria	Gammaproteobacteria	Enterobacterales	Hafniaceae	Hafnia-Obesumbacterium	-0.02 (-0.08, 0.03)
ZCML_adjusted	ASV414	-0.0345121	-0.125149	0.0561251	0.04619	0.455127	1052	8.93536	0	0	0	Bacteria	Firmicutes	Bacilli	Lactobacillales	Lactobacillaceae	Latilactobacillus	-0.03 (-0.13, 0.06)
ZCEL_adjusted	ASV1128	-0.0247231	-0.089763	0.0403168	0.0331452	0.455897	1052	3.04183	0	0	0	Bacteria	Bacteroidota	Bacteroidia	Bacteroidales	Prevotellaceae	Prevotella	-0.02 (-0.09, 0.04)
ZMGH1_adjusted	ASV1929	-0.0254015	-0.0928117	0.0420087	0.0343532	0.459819	1052	4.65779	0	0	0	Bacteria	Firmicutes	Clostridia	Lachnospirales	Lachnospiraceae	Lachnospiraceae NK4B4 group	-0.03 (-0.09, 0.04)
ZCML_adjusted	ASV1784	-0.0356911	-0.130784	0.0594018	0.0484607	0.461597	1052	16.9202	0	0	0	Bacteria	Proteobacteria	Gammaproteobacteria	Burkholderiales	Oxalobacteraceae	Oxalobacter	-0.04 (-0.13, 0.06)
ZCML_adjusted	ASV898	0.0313227	-0.0528239	0.115469	0.0428823	0.46529	1052	6.93916	0	0	0	Bacteria	Firmicutes	Bacilli	Erysipelotrichales	Erysipelotrichaceae	Catenisphaera	0.03 (-0.05, 0.12)
ZMGH1_adjusted	ASV456	0.0584935	-0.0994543	0.216441	0.0804924	0.467577	1052	22.8137	0	0	0	Bacteria	Firmicutes	Clostridia	Peptococcales	Peptococcaceae	Peptococcus	0.06 (-0.1, 0.22)
ZCML_adjusted	ASV1415	-0.0351003	-0.129964	0.0597637	0.048344	0.467972	1052	14.3536	0	0	0	Bacteria	Firmicutes	Bacilli	Erysipelotrichales	Erysipelotrichaceae	Merdibacter	-0.04 (-0.13, 0.06)
ZCEL_adjusted	ASV1044	-0.0212174	-0.0785715	0.0361367	0.0292285	0.468055	1052	1.80608	0	0	0	Bacteria	Firmicutes	Clostridia	Lachnospirales	Lachnospiraceae	Anaerosporobacter	-0.02 (-0.08, 0.04)
ZMGH1_adjusted	ASV5	-0.0382741	-0.142099	0.0655506	0.0529105	0.469615	1052	98.0989	1220	506.25	2536.5	Bacteria	Firmicutes	Clostridia	Oscillospirales	Ruminococcaceae	Faecalibacterium	-0.04 (-0.14, 0.07)
ZMGH1_adjusted	ASV3648	-0.0160666	-0.0600772	0.027944	0.0224284	0.473937	1052	2.75665	0	0	0	Bacteria	Firmicutes	Clostridia	Lachnospirales	Lachnospiraceae	GCA-900066755	-0.02 (-0.06, 0.03)
ZMGH1_adjusted	ASV207	0.0588703	-0.102609	0.22035	0.0822923	0.474536	1052	54.8479	8	0	30	Bacteria	Firmicutes	Clostridia	Oscillospirales	Oscillospiraceae	Oscillibacter	0.06 (-0.1, 0.22)
ZCML_adjusted	ASV56	-0.050211	-0.188601	0.0881789	0.0705254	0.476653	1052	92.0152	164.5	43.75	455.25	Bacteria	Bacteroidota	Bacteroidia	Bacteroidales	Rikenellaceae	Alistipes	-0.05 (-0.19, 0.09)
ZCEL_adjusted	ASV341	0.0160119	-0.0282631	0.060287	0.0225632	0.478082	1052	0.95057	0	0	0	Bacteria	Bacteroidota	Bacteroidia	Bacteroidales	Rikenellaceae	Rikenellaceae RC9 gut group	0.02 (-0.03, 0.06)
ZCEL_adjusted	ASV712	0.040235	-0.0710432	0.151513	0.0567089	0.478175	1052	21.3878	0	0	0	Bacteria	Firmicutes	Clostridia	Peptostreptococcales-Tissierellales	Anaerovoracaceae	[Eubacterium] brachy group	0.04 (-0.07, 0.15)
ZMGH1_adjusted	ASV2211	-0.0290557	-0.109617	0.0515053	0.041055	0.479276	1052	7.98479	0	0	0	Bacteria	Firmicutes	Negativicutes	Veillonellales-Selenomonadales	Veillonellaceae	Allisonella	-0.03 (-0.11, 0.05)
ZCML_adjusted	ASV1031	0.0296308	-0.0525342	0.111796	0.0418724	0.479326	1052	7.88973	0	0	0	Bacteria	Firmicutes	Bacilli	Erysipelotrichales	Erysipelotrichaceae	[Clostridium] innocuum group	0.03 (-0.05, 0.11)
ZCEL_adjusted	ASV186	-0.0588237	-0.222661	0.105014	0.083494	0.481264	1052	60.4563	16	0	51	Bacteria	Firmicutes	Clostridia	Oscillospirales	Oscillospiraceae	Intestinimonas	-0.06 (-0.22, 0.11)
ZMGH1_adjusted	ASV238	0.0635927	-0.113882	0.241067	0.0904434	0.482139	1052	46.8631	0	0	35.25	Bacteria	Firmicutes	Clostridia	Lachnospirales	Lachnospiraceae	Lachnospiraceae UCG-004	0.06 (-0.11, 0.24)
ZMGH1_adjusted	ASV98	0.0644961	-0.11615	0.245142	0.0920599	0.483718	1052	21.673	0	0	0	Bacteria	Firmicutes	Clostridia	Lachnospirales	Lachnospiraceae	[Ruminococcus] gnavus group	0.06 (-0.12, 0.25)
ZCML_adjusted	ASV355	0.0577095	-0.104604	0.220023	0.0827172	0.485539	1052	36.8821	0	0	18	Bacteria	Proteobacteria	Gammaproteobacteria	Burkholderiales	Sutterellaceae	Sutterella	0.06 (-0.1, 0.22)
ZCEL_adjusted	ASV93	0.048561	-0.0888021	0.185924	0.0700021	0.488022	1052	90.7795	143.5	48	318	Bacteria	Firmicutes	Clostridia	Lachnospirales	Lachnospiraceae	Lachnoclostridium	0.05 (-0.09, 0.19)
ZCML_adjusted	ASV77	0.0338581	-0.0620449	0.129761	0.0488735	0.48861	1052	95.6274	79.5	36	156.25	Bacteria	Firmicutes	Clostridia	Oscillospirales	Ruminococcaceae	Incertae Sedis	0.03 (-0.06, 0.13)
ZCML_adjusted	ASV1929	-0.0227114	-0.0878498	0.042427	0.0331954	0.49402	1052	4.65779	0	0	0	Bacteria	Firmicutes	Clostridia	Lachnospirales	Lachnospiraceae	Lachnospiraceae NK4B4 group	-0.02 (-0.09, 0.04)
ZCEL_adjusted	ASV53	-0.072017	-0.279151	0.135117	0.105558	0.495235	1052	36.9772	0	0	66	Bacteria	Firmicutes	Clostridia	Lachnospirales	Lachnospiraceae	[Eubacterium] ruminantium group	-0.07 (-0.28, 0.14)
ZCML_adjusted	ASV6	-0.0384352	-0.149232	0.0723615	0.0564635	0.496209	1052	96.673	700	330.75	1266.25	Bacteria	Firmicutes	Clostridia	Lachnospirales	Lachnospiraceae	[Eubacterium] hallii group	-0.04 (-0.15, 0.07)
ZCML_adjusted	ASV207	0.0540814	-0.101954	0.210117	0.0795178	0.496583	1052	54.8479	8	0	30	Bacteria	Firmicutes	Clostridia	Oscillospirales	Oscillospiraceae	Oscillibacter	0.05 (-0.1, 0.21)
ZMGH1_adjusted	ASV537	0.0439145	-0.0830435	0.170873	0.0646996	0.497452	1052	17.3954	0	0	0	Bacteria	Firmicutes	Negativicutes	Veillonellales-Selenomonadales	Veillonellaceae	Veillonella	0.04 (-0.08, 0.17)
ZMGH1_adjusted	ASV1553	0.0262374	-0.0496722	0.102147	0.0386846	0.497772	1052	7.03422	0	0	0	Bacteria	Actinobacteriota	Coriobacteriia	Coriobacteriales	Eggerthellaceae	Gordonibacter	0.03 (-0.05, 0.1)
ZCEL_adjusted	ASV3333	0.0136828	-0.0261189	0.0534845	0.0202835	0.500096	1052	1.90114	0	0	0	Bacteria	Firmicutes	Clostridia	Lachnospirales	Lachnospiraceae	CHKCI001	0.01 (-0.03, 0.05)
ZMGH1_adjusted	ASV3701	-0.0139249	-0.0549074	0.0270576	0.0208853	0.505092	1052	1.9962	0	0	0	Bacteria	Bacteroidota	Bacteroidia	Bacteroidales	Marinifilaceae	Sanguibacteroides	-0.01 (-0.05, 0.03)
ZCEL_adjusted	ASV2872	-0.0142774	-0.0563	0.0277452	0.0214153	0.505118	1052	1.71103	0	0	0	Bacteria	Actinobacteriota	Actinobacteria	Bifidobacteriales	Bifidobacteriaceae	Alloscardovia	-0.01 (-0.06, 0.03)
ZCEL_adjusted	ASV27	0.0339887	-0.0667726	0.13475	0.0513494	0.508176	1052	97.1483	302.5	139.75	677.25	Bacteria	Firmicutes	Clostridia	Lachnospirales	Lachnospiraceae	[Ruminococcus] torques group	0.03 (-0.07, 0.13)
ZCEL_adjusted	ASV456	0.0509866	-0.100173	0.202146	0.0770331	0.508196	1052	22.8137	0	0	0	Bacteria	Firmicutes	Clostridia	Peptococcales	Peptococcaceae	Peptococcus	0.05 (-0.1, 0.2)
ZMGH1_adjusted	ASV246	0.0493836	-0.0983395	0.197107	0.0752818	0.511981	1052	22.7186	0	0	0	Bacteria	Firmicutes	Clostridia	Lachnospirales	Lachnospiraceae	Lachnospiraceae AC2044 group	0.05 (-0.1, 0.2)
ZCEL_adjusted	ASV23	-0.0470394	-0.188112	0.0940336	0.0718927	0.513065	1052	93.251	578	222.75	1222.25	Bacteria	Firmicutes	Clostridia	Oscillospirales	Ruminococcaceae	Ruminococcus	-0.05 (-0.19, 0.09)
ZCML_adjusted	ASV23	-0.0473634	-0.189804	0.0950778	0.07259	0.514238	1052	93.251	578	222.75	1222.25	Bacteria	Firmicutes	Clostridia	Oscillospirales	Ruminococcaceae	Ruminococcus	-0.05 (-0.19, 0.1)
ZMGH1_adjusted	ASV1024	0.0337061	-0.0678696	0.135282	0.0517644	0.515099	1052	18.0608	0	0	0	Bacteria	Patescibacteria	Saccharimonadia	Saccharimonadales	Saccharimonadaceae	TM7x	0.03 (-0.07, 0.14)
ZMGH1_adjusted	ASV576	0.0359882	-0.0725626	0.144539	0.055319	0.515477	1052	10.1711	0	0	0	Bacteria	Actinobacteriota	Coriobacteriia	Coriobacteriales	Eggerthellaceae	Eggerthella	0.04 (-0.07, 0.14)
ZMGH1_adjusted	ASV2061	-0.0254681	-0.102384	0.0514478	0.0391974	0.516005	1052	9.22053	0	0	0	Bacteria	Firmicutes	Clostridia	Oscillospirales	Ruminococcaceae	Caproiciproducens	-0.03 (-0.1, 0.05)
ZCML_adjusted	ASV30	-0.0754146	-0.303819	0.15299	0.116398	0.517192	1052	31.749	0	0	84.25	Bacteria	Firmicutes	Clostridia	Oscillospirales	Ruminococcaceae	CAG-352	-0.08 (-0.3, 0.15)
ZCEL_adjusted	ASV429	-0.0377572	-0.153175	0.0776607	0.0588186	0.521064	1052	16.8251	0	0	0	Bacteria	Proteobacteria	Gammaproteobacteria	Enterobacterales	Pasteurellaceae	Haemophilus	-0.04 (-0.15, 0.08)
ZCEL_adjusted	ASV414	-0.0290821	-0.118856	0.0606915	0.0457498	0.525129	1052	8.93536	0	0	0	Bacteria	Firmicutes	Bacilli	Lactobacillales	Lactobacillaceae	Latilactobacillus	-0.03 (-0.12, 0.06)
ZCML_adjusted	ASV193	0.0534333	-0.112034	0.2189	0.0843243	0.526441	1052	50.3802	5	0	38	Bacteria	Firmicutes	Clostridia	Oscillospirales	Oscillospiraceae	UCG-003	0.05 (-0.11, 0.22)
ZCEL_adjusted	ASV1762	-0.0179969	-0.0737457	0.0377519	0.0284103	0.526572	1052	3.13688	0	0	0	Bacteria	Firmicutes	Clostridia	Oscillospirales	Hungateiclostridiaceae	Ruminiclostridium	-0.02 (-0.07, 0.04)
ZCML_adjusted	ASV640	-0.0209521	-0.0859088	0.0440046	0.0331028	0.526913	1052	2.6616	0	0	0	Bacteria	Firmicutes	Clostridia	Lachnospirales	Lachnospiraceae	Lachnospiraceae UCG-007	-0.02 (-0.09, 0.04)
ZCEL_adjusted	ASV3567	0.0135512	-0.0287931	0.0558954	0.0215792	0.530161	1052	2.09125	0	0	0	Bacteria	Firmicutes	Bacilli	Erysipelotrichales	Erysipelotrichaceae	Faecalicoccus	0.01 (-0.03, 0.06)
ZCML_adjusted	ASV1481	0.0238209	-0.0509619	0.0986037	0.0381104	0.532076	1052	9.69582	0	0	0	Archaea	Euryarchaeota	Methanobacteria	Methanobacteriales	Methanobacteriaceae	Methanobrevibacter	0.02 (-0.05, 0.1)
ZCML_adjusted	ASV53	0.0664688	-0.142681	0.275619	0.106586	0.533017	1052	36.9772	0	0	66	Bacteria	Firmicutes	Clostridia	Lachnospirales	Lachnospiraceae	[Eubacterium] ruminantium group	0.07 (-0.14, 0.28)
ZCEL_adjusted	ASV1195	0.0288166	-0.0621169	0.11975	0.046341	0.534186	1052	15.9696	0	0	0	Bacteria	Firmicutes	Clostridia	Oscillospirales	Oscillospiraceae	UCG-007	0.03 (-0.06, 0.12)
ZMGH1_adjusted	ASV785	0.0273552	-0.0598544	0.114565	0.0444432	0.538355	1052	7.79468	0	0	0	Bacteria	Firmicutes	Bacilli	Erysipelotrichales	Erysipelatoclostridiaceae	Coprobacillus	0.03 (-0.06, 0.11)
ZMGH1_adjusted	ASV27	0.0328806	-0.0724133	0.138175	0.0536593	0.540166	1052	97.1483	302.5	139.75	677.25	Bacteria	Firmicutes	Clostridia	Lachnospirales	Lachnospiraceae	[Ruminococcus] torques group	0.03 (-0.07, 0.14)
ZCML_adjusted	ASV1812	-0.0174238	-0.0732374	0.0383897	0.0284434	0.540289	1052	3.89734	0	0	0	Bacteria	Firmicutes	Clostridia	Eubacteriales	Eubacteriaceae	Eubacterium	-0.02 (-0.07, 0.04)
ZCML_adjusted	ASV200	-0.0348422	-0.146748	0.0770631	0.0570285	0.54136	1052	91.1597	45	17	95	Bacteria	Firmicutes	Clostridia	Peptostreptococcales-Tissierellales	Anaerovoracaceae	Family XIII AD3011 group	-0.03 (-0.15, 0.08)
ZCML_adjusted	ASV542	0.0415478	-0.0919277	0.175023	0.068021	0.541461	1052	15.019	0	0	0	Bacteria	Firmicutes	Clostridia	Lachnospirales	Lachnospiraceae	Sellimonas	0.04 (-0.09, 0.18)
ZCEL_adjusted	ASV251	0.047595	-0.106009	0.201199	0.0782785	0.543307	1052	60.076	8	0	32	Bacteria	Bacteroidota	Bacteroidia	Bacteroidales	Marinifilaceae	Odoribacter	0.05 (-0.11, 0.2)
ZCEL_adjusted	ASV2874	0.0171323	-0.0382121	0.0724767	0.0282043	0.543695	1052	4.37262	0	0	0	Bacteria	Firmicutes	Clostridia	Oscillospirales	Ruminococcaceae	Pygmaiobacter	0.02 (-0.04, 0.07)
ZCML_adjusted	ASV40	-0.0316014	-0.13392	0.0707175	0.0521431	0.544614	1052	96.673	352	169.5	657.5	Bacteria	Firmicutes	Clostridia	Lachnospirales	Lachnospiraceae	Roseburia	-0.03 (-0.13, 0.07)
ZMGH1_adjusted	ASV538	0.0384147	-0.0870677	0.163897	0.0639475	0.548158	1052	27.0913	0	0	4	Bacteria	Desulfobacterota	Desulfovibrionia	Desulfovibrionales	Desulfovibrionaceae	Bilophila	0.04 (-0.09, 0.16)
ZCEL_adjusted	ASV193	0.0496411	-0.114241	0.213523	0.0835165	0.552384	1052	50.3802	5	0	38	Bacteria	Firmicutes	Clostridia	Oscillospirales	Oscillospiraceae	UCG-003	0.05 (-0.11, 0.21)
ZCEL_adjusted	ASV768	0.0379141	-0.0878951	0.163723	0.0641141	0.554413	1052	25.9506	0	0	4	Bacteria	Bacteroidota	Bacteroidia	Bacteroidales	Marinifilaceae	Butyricimonas	0.04 (-0.09, 0.16)
ZCEL_adjusted	ASV273	-0.0465503	-0.201208	0.108108	0.078816	0.554905	1052	65.8745	16	0	40	Bacteria	Firmicutes	Clostridia	Peptostreptococcales-Tissierellales	Anaerovoracaceae	Family XIII UCG-001	-0.05 (-0.2, 0.11)
ZCEL_adjusted	ASV422	-0.0336092	-0.145275	0.0780563	0.0569063	0.554914	1052	10.4563	0	0	0	Bacteria	Firmicutes	Negativicutes	Acidaminococcales	Acidaminococcaceae	Acidaminococcus	-0.03 (-0.15, 0.08)
ZCML_adjusted	ASV238	0.0515631	-0.119936	0.223062	0.0873982	0.555334	1052	46.8631	0	0	35.25	Bacteria	Firmicutes	Clostridia	Lachnospirales	Lachnospiraceae	Lachnospiraceae UCG-004	0.05 (-0.12, 0.22)
ZCEL_adjusted	ASV13	-0.0314187	-0.137033	0.0741956	0.0538225	0.559519	1052	97.4335	466	195.75	931.5	Bacteria	Firmicutes	Clostridia	Lachnospirales	Lachnospiraceae	Anaerostipes	-0.03 (-0.14, 0.07)
ZMGH1_adjusted	ASV481	-0.0276561	-0.121578	0.0662659	0.0478639	0.563521	1052	6.46388	0	0	0	Bacteria	Firmicutes	Bacilli	Erysipelotrichales	Erysipelotrichaceae	Solobacterium	-0.03 (-0.12, 0.07)
ZCML_adjusted	ASV35	-0.0435143	-0.192147	0.105118	0.0757452	0.565767	1052	90.3992	261.5	51.75	737.5	Bacteria	Firmicutes	Clostridia	Christensenellales	Christensenellaceae	Christensenellaceae R-7 group	-0.04 (-0.19, 0.11)
ZMGH1_adjusted	ASV3567	0.0127423	-0.031507	0.0569916	0.02255	0.57215	1052	2.09125	0	0	0	Bacteria	Firmicutes	Bacilli	Erysipelotrichales	Erysipelotrichaceae	Faecalicoccus	0.01 (-0.03, 0.06)
ZCEL_adjusted	ASV207	0.0443621	-0.110186	0.19891	0.0787597	0.573381	1052	54.8479	8	0	30	Bacteria	Firmicutes	Clostridia	Oscillospirales	Oscillospiraceae	Oscillibacter	0.04 (-0.11, 0.2)
ZMGH1_adjusted	ASV151	-0.0466415	-0.209543	0.11626	0.083017	0.574354	1052	64.5437	12	0	30	Bacteria	Firmicutes	Clostridia	Oscillospirales	Ruminococcaceae	UBA1819	-0.05 (-0.21, 0.12)
ZCML_adjusted	ASV3648	0.012091	-0.0304389	0.054621	0.0216739	0.577059	1052	2.75665	0	0	0	Bacteria	Firmicutes	Clostridia	Lachnospirales	Lachnospiraceae	GCA-900066755	0.01 (-0.03, 0.05)
ZCML_adjusted	ASV3537	0.0100082	-0.0252018	0.0452182	0.0179435	0.577128	1052	1.3308	0	0	0	Bacteria	Firmicutes	Bacilli	Erysipelotrichales	Erysipelotrichaceae	Dielma	0.01 (-0.03, 0.05)
ZCML_adjusted	ASV665	0.0388585	-0.0983163	0.176033	0.0699062	0.578423	1052	22.8137	0	0	0	Bacteria	Actinobacteriota	Coriobacteriia	Coriobacteriales	Eggerthellaceae	Adlercreutzia	0.04 (-0.1, 0.18)
ZMGH1_adjusted	ASV489	-0.0437079	-0.199557	0.112141	0.0794229	0.582221	1052	37.4525	0	0	12	Bacteria	Firmicutes	Bacilli	Erysipelotrichales	Erysipelatoclostridiaceae	Erysipelatoclostridium	-0.04 (-0.2, 0.11)
ZCEL_adjusted	ASV2101	-0.0221348	-0.101075	0.0568052	0.0402289	0.582287	1052	8.74525	0	0	0	Bacteria	Firmicutes	Clostridia	Lachnospirales	Lachnospiraceae	Catenibacillus	-0.02 (-0.1, 0.06)
ZCEL_adjusted	ASV640	-0.0178974	-0.0822334	0.0464386	0.0327865	0.585269	1052	2.6616	0	0	0	Bacteria	Firmicutes	Clostridia	Lachnospirales	Lachnospiraceae	Lachnospiraceae UCG-007	-0.02 (-0.08, 0.05)
ZCML_adjusted	ASV181	0.0478818	-0.124653	0.220416	0.087926	0.586168	1052	65.8745	29	0	82	Bacteria	Firmicutes	Clostridia	Lachnospirales	Lachnospiraceae	Marvinbryantia	0.05 (-0.12, 0.22)
ZCML_adjusted	ASV1991	-0.0189514	-0.0873726	0.0494697	0.0348684	0.586894	1052	9.69582	0	0	0	Bacteria	Firmicutes	Clostridia	Oscillospirales	Ruminococcaceae	Anaerofilum	-0.02 (-0.09, 0.05)
ZMGH1_adjusted	ASV1844	0.0124864	-0.0328297	0.0578026	0.0230937	0.588842	1052	1.23574	0	0	0	Bacteria	Firmicutes	Bacilli	Lactobacillales	Lactobacillaceae	Weissella	0.01 (-0.03, 0.06)
ZMGH1_adjusted	ASV3115	0.0130362	-0.0343558	0.0604282	0.0241516	0.589476	1052	3.04183	0	0	0	Bacteria	Firmicutes	Bacilli	Lactobacillales	Lactobacillaceae	Leuconostoc	0.01 (-0.03, 0.06)
ZCEL_adjusted	ASV1749	0.0143269	-0.0378053	0.0664591	0.0265673	0.589819	1052	3.23194	0	0	0	Bacteria	Actinobacteriota	Coriobacteriia	Coriobacteriales	Atopobiaceae	Coriobacteriaceae UCG-002	0.01 (-0.04, 0.07)
ZCML_adjusted	ASV58	-0.051741	-0.240172	0.13669	0.0960272	0.59013	1052	71.8631	48.5	0	168	Bacteria	Firmicutes	Bacilli	Erysipelotrichales	Erysipelatoclostridiaceae	Erysipelotrichaceae UCG-003	-0.05 (-0.24, 0.14)
ZCEL_adjusted	ASV146	-0.0492943	-0.230953	0.132364	0.0925755	0.59451	1052	46.8631	0	0	40	Bacteria	Firmicutes	Bacilli	Erysipelotrichales	Erysipelotrichaceae	Turicibacter	-0.05 (-0.23, 0.13)
ZCEL_adjusted	ASV1031	-0.0220251	-0.10341	0.0593594	0.0414747	0.595499	1052	7.88973	0	0	0	Bacteria	Firmicutes	Bacilli	Erysipelotrichales	Erysipelotrichaceae	[Clostridium] innocuum group	-0.02 (-0.1, 0.06)
ZMGH1_adjusted	ASV921	-0.0222624	-0.10496	0.0604349	0.0421437	0.59744	1052	6.36882	0	0	0	Bacteria	Firmicutes	Clostridia	Lachnospirales	Lachnospiraceae	Oribacterium	-0.02 (-0.1, 0.06)
ZCEL_adjusted	ASV44	0.0589789	-0.160147	0.278105	0.11167	0.597506	1052	33.4601	0	0	87.5	Bacteria	Firmicutes	Negativicutes	Veillonellales-Selenomonadales	Veillonellaceae	Dialister	0.06 (-0.16, 0.28)
ZCML_adjusted	ASV251	0.0415265	-0.113574	0.196627	0.0790412	0.599434	1052	60.076	8	0	32	Bacteria	Bacteroidota	Bacteroidia	Bacteroidales	Marinifilaceae	Odoribacter	0.04 (-0.11, 0.2)
ZMGH1_adjusted	ASV83	0.0386159	-0.106822	0.184054	0.0741174	0.602472	1052	87.4525	82.5	32	177	Bacteria	Firmicutes	Clostridia	Oscillospirales	Butyricicoccaceae	Butyricicoccus	0.04 (-0.11, 0.18)
ZCML_adjusted	ASV481	-0.0240603	-0.114816	0.0666957	0.0462505	0.603024	1052	6.46388	0	0	0	Bacteria	Firmicutes	Bacilli	Erysipelotrichales	Erysipelotrichaceae	Solobacterium	-0.02 (-0.11, 0.07)
ZCML_adjusted	ASV284	0.0189991	-0.0538235	0.0918217	0.0371114	0.608798	1052	2.37643	0	0	0	Bacteria	Firmicutes	Negativicutes	Veillonellales-Selenomonadales	Selenomonadaceae	Megamonas	0.02 (-0.05, 0.09)
ZCML_adjusted	ASV80	0.0438273	-0.124362	0.212016	0.0857115	0.609226	1052	79.1825	60	12	176.5	Bacteria	Firmicutes	Clostridia	Lachnospirales	Lachnospiraceae	Lachnospira	0.04 (-0.12, 0.21)
ZCEL_adjusted	ASV3	-0.0615745	-0.298016	0.174867	0.120494	0.609448	1052	68.346	68.5	0	599	Bacteria	Proteobacteria	Gammaproteobacteria	Enterobacterales	Enterobacteriaceae	Escherichia-Shigella	-0.06 (-0.3, 0.17)
ZCML_adjusted	ASV538	0.0314802	-0.0897745	0.152735	0.0617931	0.610549	1052	27.0913	0	0	4	Bacteria	Desulfobacterota	Desulfovibrionia	Desulfovibrionales	Desulfovibrionaceae	Bilophila	0.03 (-0.09, 0.15)
ZCEL_adjusted	ASV58	0.0479418	-0.138683	0.234567	0.0951066	0.614309	1052	71.8631	48.5	0	168	Bacteria	Firmicutes	Bacilli	Erysipelotrichales	Erysipelatoclostridiaceae	Erysipelotrichaceae UCG-003	0.05 (-0.14, 0.23)
ZCML_adjusted	ASV135	0.0396797	-0.116094	0.195453	0.0793844	0.617293	1052	76.9962	41	8	93	Bacteria	Firmicutes	Clostridia	Lachnospirales	Lachnospiraceae	Lachnospiraceae FCS020 group	0.04 (-0.12, 0.2)
ZMGH1_adjusted	ASV1784	0.02502	-0.0734073	0.123447	0.0501599	0.618024	1052	16.9202	0	0	0	Bacteria	Proteobacteria	Gammaproteobacteria	Burkholderiales	Oxalobacteraceae	Oxalobacter	0.03 (-0.07, 0.12)
ZCML_adjusted	ASV1062	-0.0318804	-0.157653	0.0938924	0.0640956	0.619021	1052	39.924	0	0	8	Bacteria	Firmicutes	Clostridia	Lachnospirales	Defluviitaleaceae	Defluviitaleaceae UCG-011	-0.03 (-0.16, 0.09)
ZCEL_adjusted	ASV1397	-0.0134295	-0.0665329	0.0396739	0.0270622	0.619828	1052	2.09125	0	0	0	Bacteria	Firmicutes	Bacilli	Lactobacillales	Lactobacillaceae	Lactiplantibacillus	-0.01 (-0.07, 0.04)
ZCML_adjusted	ASV1762	-0.0140698	-0.0703636	0.0422239	0.0286881	0.623926	1052	3.13688	0	0	0	Bacteria	Firmicutes	Clostridia	Oscillospirales	Hungateiclostridiaceae	Ruminiclostridium	-0.01 (-0.07, 0.04)
ZCEL_adjusted	ASV4620	0.00923261	-0.0279126	0.0463778	0.0189297	0.625844	1052	1.61597	0	0	0	Bacteria	Firmicutes	Clostridia	Peptostreptococcales-Tissierellales	Family XI	Finegoldia	0.01 (-0.03, 0.05)
ZCML_adjusted	ASV358	-0.0159731	-0.0802385	0.0482922	0.0327505	0.625851	1052	3.80228	0	0	0	Bacteria	Proteobacteria	Gammaproteobacteria	Pseudomonadales	Pseudomonadaceae	Pseudomonas	-0.02 (-0.08, 0.05)
ZCML_adjusted	ASV47	-0.0431599	-0.217187	0.130868	0.0886868	0.626607	1052	17.4905	0	0	0	Bacteria	Firmicutes	Clostridia	Lachnospirales	Lachnospiraceae	Butyrivibrio	-0.04 (-0.22, 0.13)
ZCML_adjusted	ASV1099	-0.015401	-0.0775446	0.0467425	0.0316692	0.626851	1052	3.51711	0	0	0	Bacteria	Firmicutes	Clostridia	Lachnospirales	Lachnospiraceae	Epulopiscium	-0.02 (-0.08, 0.05)
ZMGH1_adjusted	ASV16	-0.0479335	-0.246447	0.15058	0.101165	0.635733	1052	78.0418	110	11	344.25	Bacteria	Firmicutes	Clostridia	Peptostreptococcales-Tissierellales	Peptostreptococcaceae	Romboutsia	-0.05 (-0.25, 0.15)
ZCEL_adjusted	ASV303	0.0392061	-0.124673	0.203085	0.0835152	0.638848	1052	29.943	0	0	17	Bacteria	Desulfobacterota	Desulfovibrionia	Desulfovibrionales	Desulfovibrionaceae	Desulfovibrio	0.04 (-0.12, 0.2)
ZCEL_adjusted	ASV33	-0.0511214	-0.267124	0.164882	0.110078	0.642452	1052	49.9049	0	0	145.25	Bacteria	Firmicutes	Clostridia	Peptostreptococcales-Tissierellales	Peptostreptococcaceae	Intestinibacter	-0.05 (-0.27, 0.16)
ZCEL_adjusted	ASV3115	0.0106604	-0.0346947	0.0560154	0.0231136	0.64474	1052	3.04183	0	0	0	Bacteria	Firmicutes	Bacilli	Lactobacillales	Lactobacillaceae	Leuconostoc	0.01 (-0.03, 0.06)
ZMGH1_adjusted	ASV2872	0.0102864	-0.0336302	0.0542029	0.0223805	0.64589	1052	1.71103	0	0	0	Bacteria	Actinobacteriota	Actinobacteria	Bifidobacteriales	Bifidobacteriaceae	Alloscardovia	0.01 (-0.03, 0.05)
ZMGH1_adjusted	ASV621	-0.0272409	-0.144999	0.0905175	0.0600113	0.649975	1052	13.9734	0	0	0	Bacteria	Firmicutes	Clostridia	Lachnospirales	Lachnospiraceae	Eisenbergiella	-0.03 (-0.14, 0.09)
ZMGH1_adjusted	ASV201	-0.040554	-0.216132	0.135024	0.0894772	0.650477	1052	40.8745	0	0	34.25	Bacteria	Firmicutes	Clostridia	Lachnospirales	Lachnospiraceae	Lachnospiraceae UCG-001	-0.04 (-0.22, 0.14)
ZCEL_adjusted	ASV67	0.0271618	-0.0904698	0.144793	0.0599467	0.650573	1052	92.2053	75	29	141.25	Bacteria	Firmicutes	Clostridia	Monoglobales	Monoglobaceae	Monoglobus	0.03 (-0.09, 0.14)
ZCEL_adjusted	ASV490	0.0242771	-0.0811496	0.129704	0.0537269	0.651464	1052	11.7871	0	0	0	Bacteria	Firmicutes	Clostridia	Lachnospirales	Lachnospiraceae	UC5-1-2E3	0.02 (-0.08, 0.13)
ZCEL_adjusted	ASV16	-0.0430016	-0.232978	0.146975	0.0968147	0.657017	1052	78.0418	110	11	344.25	Bacteria	Firmicutes	Clostridia	Peptostreptococcales-Tissierellales	Peptostreptococcaceae	Romboutsia	-0.04 (-0.23, 0.15)
ZMGH1_adjusted	ASV706	-0.0324256	-0.177051	0.1122	0.0737031	0.660066	1052	29.8479	0	0	11	Bacteria	Firmicutes	Clostridia	Oscillospirales	Oscillospiraceae	Oscillospira	-0.03 (-0.18, 0.11)
ZMGH1_adjusted	ASV341	0.010323	-0.0359493	0.0565953	0.023581	0.661647	1052	0.95057	0	0	0	Bacteria	Bacteroidota	Bacteroidia	Bacteroidales	Rikenellaceae	Rikenellaceae RC9 gut group	0.01 (-0.04, 0.06)
ZMGH1_adjusted	ASV67	-0.0272087	-0.150129	0.0957117	0.0626419	0.664123	1052	92.2053	75	29	141.25	Bacteria	Firmicutes	Clostridia	Monoglobales	Monoglobaceae	Monoglobus	-0.03 (-0.15, 0.1)
ZMGH1_adjusted	ASV355	0.0371672	-0.130838	0.205172	0.0856178	0.664302	1052	36.8821	0	0	18	Bacteria	Proteobacteria	Gammaproteobacteria	Burkholderiales	Sutterellaceae	Sutterella	0.04 (-0.13, 0.21)
ZCEL_adjusted	ASV50	-0.0318677	-0.176774	0.113039	0.0738463	0.666165	1052	89.5437	176.5	52	450	Bacteria	Firmicutes	Clostridia	Lachnospirales	Lachnospiraceae	Lachnospiraceae NK4A136 group	-0.03 (-0.18, 0.11)
ZMGH1_adjusted	ASV40	-0.0230768	-0.128978	0.0828242	0.0539686	0.669034	1052	96.673	352	169.5	657.5	Bacteria	Firmicutes	Clostridia	Lachnospirales	Lachnospiraceae	Roseburia	-0.02 (-0.13, 0.08)
ZCEL_adjusted	ASV1139	-0.0139572	-0.0783289	0.0504144	0.0328047	0.670587	1052	4.46768	0	0	0	Bacteria	Firmicutes	Clostridia	Lachnospirales	Lachnospiraceae	Lachnospiraceae UCG-009	-0.01 (-0.08, 0.05)
ZMGH1_adjusted	ASV378	-0.0328904	-0.185487	0.119706	0.0777653	0.672424	1052	41.0646	0	0	13	Bacteria	Firmicutes	Clostridia	Oscillospirales	Ruminococcaceae	DTU089	-0.03 (-0.19, 0.12)
ZCEL_adjusted	ASV40	-0.0216698	-0.123015	0.0796758	0.0516472	0.674884	1052	96.673	352	169.5	657.5	Bacteria	Firmicutes	Clostridia	Lachnospirales	Lachnospiraceae	Roseburia	-0.02 (-0.12, 0.08)
ZCML_adjusted	ASV3567	-0.00913355	-0.0518929	0.0336258	0.0217908	0.675195	1052	2.09125	0	0	0	Bacteria	Firmicutes	Bacilli	Erysipelotrichales	Erysipelotrichaceae	Faecalicoccus	-0.01 (-0.05, 0.03)
ZCML_adjusted	ASV785	0.0178992	-0.0663765	0.102175	0.042948	0.676938	1052	7.79468	0	0	0	Bacteria	Firmicutes	Bacilli	Erysipelotrichales	Erysipelatoclostridiaceae	Coprobacillus	0.02 (-0.07, 0.1)
ZMGH1_adjusted	ASV2119	0.015319	-0.0571245	0.0877625	0.0369182	0.678269	1052	9.5057	0	0	0	Bacteria	Firmicutes	Clostridia	Christensenellales	Christensenellaceae	Christensenella	0.02 (-0.06, 0.09)
ZMGH1_adjusted	ASV13	0.0233083	-0.0870626	0.133679	0.0562466	0.678671	1052	97.4335	466	195.75	931.5	Bacteria	Firmicutes	Clostridia	Lachnospirales	Lachnospiraceae	Anaerostipes	0.02 (-0.09, 0.13)
ZMGH1_adjusted	ASV58	0.041011	-0.154011	0.236033	0.0993859	0.679953	1052	71.8631	48.5	0	168	Bacteria	Firmicutes	Bacilli	Erysipelotrichales	Erysipelatoclostridiaceae	Erysipelotrichaceae UCG-003	0.04 (-0.15, 0.24)
ZMGH1_adjusted	ASV1139	-0.0140779	-0.0813436	0.0531878	0.0342795	0.681393	1052	4.46768	0	0	0	Bacteria	Firmicutes	Clostridia	Lachnospirales	Lachnospiraceae	Lachnospiraceae UCG-009	-0.01 (-0.08, 0.05)
ZMGH1_adjusted	ASV33	0.0470104	-0.178708	0.272729	0.115029	0.682858	1052	49.9049	0	0	145.25	Bacteria	Firmicutes	Clostridia	Peptostreptococcales-Tissierellales	Peptostreptococcaceae	Intestinibacter	0.05 (-0.18, 0.27)
ZCEL_adjusted	ASV446	-0.0276286	-0.160505	0.105248	0.0677156	0.683352	1052	20.1521	0	0	0	Bacteria	Actinobacteriota	Coriobacteriia	Coriobacteriales	Eggerthellaceae	Enterorhabdus	-0.03 (-0.16, 0.11)
ZMGH1_adjusted	ASV1812	-0.0119974	-0.0697656	0.0457709	0.0294395	0.683706	1052	3.89734	0	0	0	Bacteria	Firmicutes	Clostridia	Eubacteriales	Eubacteriaceae	Eubacterium	-0.01 (-0.07, 0.05)
ZCML_adjusted	ASV490	0.0219775	-0.0844736	0.128429	0.0542489	0.685471	1052	11.7871	0	0	0	Bacteria	Firmicutes	Clostridia	Lachnospirales	Lachnospiraceae	UC5-1-2E3	0.02 (-0.08, 0.13)
ZCML_adjusted	ASV589	-0.0178204	-0.10576	0.0701194	0.0448153	0.690977	1052	4.65779	0	0	0	Bacteria	Firmicutes	Negativicutes	Veillonellales-Selenomonadales	Veillonellaceae	Megasphaera	-0.02 (-0.11, 0.07)
ZCML_adjusted	ASV159	0.0337717	-0.136283	0.203826	0.0866622	0.696844	1052	30.7985	0	0	22	Bacteria	Actinobacteriota	Coriobacteriia	Coriobacteriales	Coriobacteriaceae	Collinsella	0.03 (-0.14, 0.2)
ZCML_adjusted	ASV621	0.0222433	-0.0915454	0.136032	0.0579883	0.701367	1052	13.9734	0	0	0	Bacteria	Firmicutes	Clostridia	Lachnospirales	Lachnospiraceae	Eisenbergiella	0.02 (-0.09, 0.14)
ZCML_adjusted	ASV44	0.042878	-0.178388	0.264144	0.11276	0.703832	1052	33.4601	0	0	87.5	Bacteria	Firmicutes	Negativicutes	Veillonellales-Selenomonadales	Veillonellaceae	Dialister	0.04 (-0.18, 0.26)
ZMGH1_adjusted	ASV113	-0.0345341	-0.215868	0.1468	0.0924102	0.708701	1052	63.5932	25	0	90	Bacteria	Firmicutes	Clostridia	Lachnospirales	Lachnospiraceae	[Eubacterium] xylanophilum group	-0.03 (-0.22, 0.15)
ZCML_adjusted	ASV20	0.0185198	-0.0792843	0.116324	0.0498424	0.710291	1052	98.9544	1143.5	396.75	2518.75	Bacteria	Bacteroidota	Bacteroidia	Bacteroidales	Bacteroidaceae	Bacteroides	0.02 (-0.08, 0.12)
ZCEL_adjusted	ASV2152	-0.0102835	-0.0646545	0.0440876	0.0277082	0.710614	1052	5.41825	0	0	0	Bacteria	Verrucomicrobiota	Lentisphaeria	Victivallales	Victivallaceae	Victivallis	-0.01 (-0.06, 0.04)
ZMGH1_adjusted	ASV1176	-0.0134584	-0.0848418	0.0579249	0.0363779	0.711487	1052	5.89354	0	0	0	Bacteria	Firmicutes	Clostridia	Peptostreptococcales-Tissierellales	Anaerovoracaceae	[Eubacterium] nodatum group	-0.01 (-0.08, 0.06)
ZCML_adjusted	ASV860	0.0167221	-0.0725652	0.106009	0.045502	0.71332	1052	6.27376	0	0	0	Bacteria	Firmicutes	Negativicutes	Veillonellales-Selenomonadales	Selenomonadaceae	Mitsuokella	0.02 (-0.07, 0.11)
ZMGH1_adjusted	ASV1031	0.0159188	-0.0691303	0.100968	0.0433422	0.713485	1052	7.88973	0	0	0	Bacteria	Firmicutes	Bacilli	Erysipelotrichales	Erysipelotrichaceae	[Clostridium] innocuum group	0.02 (-0.07, 0.1)
ZCML_adjusted	ASV41	0.035795	-0.15648	0.22807	0.097986	0.714957	1052	75	100.5	4.5	235	Bacteria	Firmicutes	Clostridia	Lachnospirales	Lachnospiraceae	[Ruminococcus] gauvreauii group	0.04 (-0.16, 0.23)
ZMGH1_adjusted	ASV71	0.0314891	-0.139011	0.201989	0.0868892	0.717123	1052	80.3232	61	9	180.25	Bacteria	Bacteroidota	Bacteroidia	Bacteroidales	Tannerellaceae	Parabacteroides	0.03 (-0.14, 0.2)
ZCEL_adjusted	ASV2005	0.00768399	-0.034682	0.05005	0.0215903	0.721988	1052	1.3308	0	0	0	Bacteria	Proteobacteria	Gammaproteobacteria	Enterobacterales	Succinivibrionaceae	Succinivibrio	0.01 (-0.03, 0.05)
ZMGH1_adjusted	ASV860	-0.0166902	-0.109095	0.0757151	0.047091	0.723094	1052	6.27376	0	0	0	Bacteria	Firmicutes	Negativicutes	Veillonellales-Selenomonadales	Selenomonadaceae	Mitsuokella	-0.02 (-0.11, 0.08)
ZCML_adjusted	ASV246	-0.0255152	-0.168276	0.117245	0.0727527	0.725877	1052	22.7186	0	0	0	Bacteria	Firmicutes	Clostridia	Lachnospirales	Lachnospiraceae	Lachnospiraceae AC2044 group	-0.03 (-0.17, 0.12)
ZMGH1_adjusted	ASV369	-0.0291826	-0.196619	0.138254	0.085328	0.732417	1052	42.2053	0	0	22	Bacteria	Firmicutes	Clostridia	Oscillospirales	Ruminococcaceae	Negativibacillus	-0.03 (-0.2, 0.14)
ZMGH1_adjusted	ASV159	0.0301067	-0.145889	0.206102	0.0896899	0.737184	1052	30.7985	0	0	22	Bacteria	Actinobacteriota	Coriobacteriia	Coriobacteriales	Coriobacteriaceae	Collinsella	0.03 (-0.15, 0.21)
ZCML_adjusted	ASV1551	0.0155954	-0.0766456	0.107836	0.0470073	0.740134	1052	9.03042	0	0	0	Bacteria	Actinobacteriota	Coriobacteriia	Coriobacteriales	Atopobiaceae	Olsenella	0.02 (-0.08, 0.11)
ZCEL_adjusted	ASV785	0.0140565	-0.0694124	0.0975254	0.0425369	0.741124	1052	7.79468	0	0	0	Bacteria	Firmicutes	Bacilli	Erysipelotrichales	Erysipelatoclostridiaceae	Coprobacillus	0.01 (-0.07, 0.1)
ZCML_adjusted	ASV1020	0.00661264	-0.0333357	0.046561	0.0203582	0.745388	1052	1.04563	0	0	0	Bacteria	Firmicutes	Bacilli	Lactobacillales	Lactobacillaceae	HT002	0.01 (-0.03, 0.05)
ZCML_adjusted	ASV936	0.0235932	-0.119103	0.166289	0.0727198	0.745671	1052	47.8137	0	0	14	Bacteria	Firmicutes	Clostridia	Oscillospirales	Ruminococcaceae	Paludicola	0.02 (-0.12, 0.17)
ZMGH1_adjusted	ASV50	-0.0250226	-0.176449	0.126404	0.0771689	0.745809	1052	89.5437	176.5	52	450	Bacteria	Firmicutes	Clostridia	Lachnospirales	Lachnospiraceae	Lachnospiraceae NK4A136 group	-0.03 (-0.18, 0.13)
ZCML_adjusted	ASV2872	-0.00696614	-0.0494032	0.0354709	0.0216265	0.747434	1052	1.71103	0	0	0	Bacteria	Actinobacteriota	Actinobacteria	Bifidobacteriales	Bifidobacteriaceae	Alloscardovia	-0.01 (-0.05, 0.04)
ZCML_adjusted	ASV401	0.0245703	-0.127454	0.176594	0.0774736	0.751198	1052	34.1255	0	0	9.25	Bacteria	Proteobacteria	Gammaproteobacteria	Burkholderiales	Sutterellaceae	Parasutterella	0.02 (-0.13, 0.18)
ZCML_adjusted	ASV1139	-0.010315	-0.0753136	0.0546835	0.0331242	0.755556	1052	4.46768	0	0	0	Bacteria	Firmicutes	Clostridia	Lachnospirales	Lachnospiraceae	Lachnospiraceae UCG-009	-0.01 (-0.08, 0.05)
ZCEL_adjusted	ASV5	-0.0156643	-0.115043	0.0837147	0.0506449	0.757159	1052	98.0989	1220	506.25	2536.5	Bacteria	Firmicutes	Clostridia	Oscillospirales	Ruminococcaceae	Faecalibacterium	-0.02 (-0.12, 0.08)
ZCEL_adjusted	ASV238	0.0262886	-0.143584	0.196161	0.0865696	0.76144	1052	46.8631	0	0	35.25	Bacteria	Firmicutes	Clostridia	Lachnospirales	Lachnospiraceae	Lachnospiraceae UCG-004	0.03 (-0.14, 0.2)
ZMGH1_adjusted	ASV554	-0.0139933	-0.104528	0.0765417	0.0461379	0.761727	1052	5.03802	0	0	0	Bacteria	Firmicutes	Clostridia	Lachnospirales	Lachnospiraceae	[Bacteroides] pectinophilus group	-0.01 (-0.1, 0.08)
ZCML_adjusted	ASV46	-0.0285982	-0.215256	0.158059	0.0951232	0.763747	1052	72.1483	35	0	160.25	Bacteria	Firmicutes	Clostridia	Oscillospirales	Ruminococcaceae	[Eubacterium] siraeum group	-0.03 (-0.22, 0.16)
ZCML_adjusted	ASV456	0.0231013	-0.12955	0.175753	0.0777933	0.766558	1052	22.8137	0	0	0	Bacteria	Firmicutes	Clostridia	Peptococcales	Peptococcaceae	Peptococcus	0.02 (-0.13, 0.18)
ZCEL_adjusted	ASV2061	-0.0109875	-0.0846067	0.0626317	0.0375174	0.769684	1052	9.22053	0	0	0	Bacteria	Firmicutes	Clostridia	Oscillospirales	Ruminococcaceae	Caproiciproducens	-0.01 (-0.08, 0.06)
ZCML_adjusted	ASV537	0.0182893	-0.104408	0.140986	0.0625281	0.769965	1052	17.3954	0	0	0	Bacteria	Firmicutes	Negativicutes	Veillonellales-Selenomonadales	Veillonellaceae	Veillonella	0.02 (-0.1, 0.14)
ZMGH1_adjusted	ASV283	0.0237044	-0.135931	0.183339	0.0813523	0.77082	1052	28.5171	0	0	14	Bacteria	Actinobacteriota	Coriobacteriia	Coriobacteriales	Eggerthellaceae	Senegalimassilia	0.02 (-0.14, 0.18)
ZCML_adjusted	ASV3559	0.00629203	-0.0364721	0.0490562	0.0217932	0.772858	1052	3.89734	0	0	0	Bacteria	Firmicutes	Clostridia	Oscillospirales	Ethanoligenenaceae	Acetanaerobacterium	0.01 (-0.04, 0.05)
ZMGH1_adjusted	ASV936	-0.0215975	-0.169278	0.126082	0.0752598	0.77419	1052	47.8137	0	0	14	Bacteria	Firmicutes	Clostridia	Oscillospirales	Ruminococcaceae	Paludicola	-0.02 (-0.17, 0.13)
ZCEL_adjusted	ASV1844	0.00621816	-0.037153	0.0495894	0.0221026	0.778512	1052	1.23574	0	0	0	Bacteria	Firmicutes	Bacilli	Lactobacillales	Lactobacillaceae	Weissella	0.01 (-0.04, 0.05)
ZMGH1_adjusted	ASV229	-0.0167283	-0.133738	0.100281	0.0596297	0.779123	1052	10.7414	0	0	0	Bacteria	Firmicutes	Bacilli	Lactobacillales	Enterococcaceae	Enterococcus	-0.02 (-0.13, 0.1)
ZCML_adjusted	ASV4217	-0.00553006	-0.0442465	0.0331864	0.0197304	0.779319	1052	2.18631	0	0	0	Bacteria	Actinobacteriota	Coriobacteriia	Coriobacteriales	Atopobiaceae	Atopobium	-0.01 (-0.04, 0.03)
ZMGH1_adjusted	ASV8	-0.0161574	-0.129475	0.0971605	0.0577484	0.779695	1052	96.673	653.5	319.75	1284.75	Bacteria	Firmicutes	Clostridia	Oscillospirales	Ruminococcaceae	Subdoligranulum	-0.02 (-0.13, 0.1)
ZCEL_adjusted	ASV19	-0.0293818	-0.236018	0.177254	0.105305	0.780287	1052	77.5665	192.5	12	601	Bacteria	Actinobacteriota	Actinobacteria	Bifidobacteriales	Bifidobacteriaceae	Bifidobacterium	-0.03 (-0.24, 0.18)
ZCML_adjusted	ASV264	0.0167131	-0.101338	0.134764	0.0601603	0.781215	1052	7.22433	0	0	0	Bacteria	Bacteroidota	Bacteroidia	Bacteroidales	Prevotellaceae	Prevotellaceae NK3B31 group	0.02 (-0.1, 0.13)
ZCEL_adjusted	ASV6	-0.0154491	-0.125202	0.0943041	0.0559318	0.78244	1052	96.673	700	330.75	1266.25	Bacteria	Firmicutes	Clostridia	Lachnospirales	Lachnospiraceae	[Eubacterium] hallii group	-0.02 (-0.13, 0.09)
ZCML_adjusted	ASV2894	-0.00707346	-0.0574874	0.0433405	0.0256917	0.783125	1052	6.46388	0	0	0	Bacteria	Firmicutes	Clostridia	Oscillospirales	Oscillospiraceae	Papillibacter	-0.01 (-0.06, 0.04)
ZMGH1_adjusted	ASV422	-0.0161948	-0.132895	0.100506	0.0594723	0.78544	1052	10.4563	0	0	0	Bacteria	Firmicutes	Negativicutes	Acidaminococcales	Acidaminococcaceae	Acidaminococcus	-0.02 (-0.13, 0.1)
ZMGH1_adjusted	ASV490	0.0152336	-0.0949392	0.125406	0.0561456	0.786197	1052	11.7871	0	0	0	Bacteria	Firmicutes	Clostridia	Lachnospirales	Lachnospiraceae	UC5-1-2E3	0.02 (-0.09, 0.13)
ZCML_adjusted	ASV273	-0.0214314	-0.17761	0.134747	0.0795909	0.787776	1052	65.8745	16	0	40	Bacteria	Firmicutes	Clostridia	Peptostreptococcales-Tissierellales	Anaerovoracaceae	Family XIII UCG-001	-0.02 (-0.18, 0.13)
ZCML_adjusted	ASV2160	-0.00819304	-0.0692098	0.0528238	0.031095	0.79223	1052	6.65399	0	0	0	Bacteria	Firmicutes	Clostridia	Oscillospirales	Ruminococcaceae	Phocea	-0.01 (-0.07, 0.05)
ZMGH1_adjusted	ASV89	0.026501	-0.173701	0.226703	0.102026	0.795111	1052	54.8479	21	0	98.25	Bacteria	Firmicutes	Clostridia	Lachnospirales	Lachnospiraceae	CAG-56	0.03 (-0.17, 0.23)
ZMGH1_adjusted	ASV2874	0.00759807	-0.0502427	0.0654388	0.0294764	0.796638	1052	4.37262	0	0	0	Bacteria	Firmicutes	Clostridia	Oscillospirales	Ruminococcaceae	Pygmaiobacter	0.01 (-0.05, 0.07)
ZMGH1_adjusted	ASV417	0.015417	-0.102017	0.132851	0.0598461	0.796759	1052	16.1597	0	0	0	Bacteria	Actinobacteriota	Coriobacteriia	Coriobacteriales	Eggerthellaceae	Slackia	0.02 (-0.1, 0.13)
ZMGH1_adjusted	ASV3559	0.00573941	-0.0385183	0.0499971	0.0225544	0.799183	1052	3.89734	0	0	0	Bacteria	Firmicutes	Clostridia	Oscillospirales	Ethanoligenenaceae	Acetanaerobacterium	0.01 (-0.04, 0.05)
ZCML_adjusted	ASV1397	-0.00694911	-0.0605722	0.046674	0.0273271	0.799319	1052	2.09125	0	0	0	Bacteria	Firmicutes	Bacilli	Lactobacillales	Lactobacillaceae	Lactiplantibacillus	-0.01 (-0.06, 0.05)
ZCEL_adjusted	ASV253	0.0127588	-0.0859331	0.111451	0.0502947	0.799793	1052	9.31559	0	0	0	Bacteria	Firmicutes	Bacilli	Acholeplasmatales	Acholeplasmataceae	Anaeroplasma	0.01 (-0.09, 0.11)
ZCEL_adjusted	ASV589	0.0110281	-0.0760712	0.0981274	0.044387	0.803834	1052	4.65779	0	0	0	Bacteria	Firmicutes	Negativicutes	Veillonellales-Selenomonadales	Veillonellaceae	Megasphaera	0.01 (-0.08, 0.1)
ZMGH1_adjusted	ASV104	0.027071	-0.188073	0.242215	0.109641	0.805029	1052	38.8783	0	0	83.25	Bacteria	Firmicutes	Bacilli	Erysipelotrichales	Erysipelotrichaceae	Holdemanella	0.03 (-0.19, 0.24)
ZCEL_adjusted	ASV813	0.0149334	-0.1042	0.134066	0.0607119	0.805753	1052	21.3878	0	0	0	Bacteria	Firmicutes	Clostridia	Oscillospirales	Ruminococcaceae	Fournierella	0.01 (-0.1, 0.13)
ZCML_adjusted	ASV253	0.0124836	-0.0871655	0.112133	0.0507825	0.805867	1052	9.31559	0	0	0	Bacteria	Firmicutes	Bacilli	Acholeplasmatales	Acholeplasmataceae	Anaeroplasma	0.01 (-0.09, 0.11)
ZCEL_adjusted	ASV181	0.0213283	-0.149569	0.192225	0.0870915	0.806587	1052	65.8745	29	0	82	Bacteria	Firmicutes	Clostridia	Lachnospirales	Lachnospiraceae	Marvinbryantia	0.02 (-0.15, 0.19)
ZMGH1_adjusted	ASV1268	0.00794755	-0.0563078	0.0722029	0.0327454	0.808281	1052	4.37262	0	0	0	Bacteria	Synergistota	Synergistia	Synergistales	Synergistaceae	Cloacibacillus	0.01 (-0.06, 0.07)
ZCML_adjusted	ASV3115	-0.00566097	-0.0514592	0.0401373	0.0233394	0.808403	1052	3.04183	0	0	0	Bacteria	Firmicutes	Bacilli	Lactobacillales	Lactobacillaceae	Leuconostoc	-0.01 (-0.05, 0.04)
ZCML_adjusted	ASV1	-0.00842057	-0.0766413	0.0598002	0.0347663	0.808669	1052	99.5247	2396.5	1302.75	4277.75	Bacteria	Firmicutes	Clostridia	Lachnospirales	Lachnospiraceae	Blautia	-0.01 (-0.08, 0.06)
ZMGH1_adjusted	ASV2651	0.00567155	-0.0406092	0.0519523	0.0235853	0.810014	1052	1.90114	0	0	0	Bacteria	Firmicutes	Clostridia	Lachnospirales	Lachnospiraceae	Lactonifactor	0.01 (-0.04, 0.05)
ZCML_adjusted	ASV434	0.0165607	-0.119402	0.152524	0.0692886	0.811144	1052	24.5247	0	0	0	Bacteria	Firmicutes	Clostridia	Oscillospirales	Oscillospiraceae	Flavonifractor	0.02 (-0.12, 0.15)
ZMGH1_adjusted	ASV242	0.0209453	-0.151938	0.193829	0.0881038	0.812134	1052	40.3992	0	0	21	Bacteria	Firmicutes	Clostridia	Lachnospirales	Lachnospiraceae	Lachnospiraceae UCG-010	0.02 (-0.15, 0.19)
ZCML_adjusted	ASV113	0.020757	-0.154466	0.19598	0.0892961	0.816233	1052	63.5932	25	0	90	Bacteria	Firmicutes	Clostridia	Lachnospirales	Lachnospiraceae	[Eubacterium] xylanophilum group	0.02 (-0.15, 0.2)
ZCEL_adjusted	ASV208	-0.0174015	-0.167486	0.132683	0.0764853	0.820069	1052	21.5779	0	0	0	Bacteria	Firmicutes	Bacilli	Lactobacillales	Lactobacillaceae	Lactobacillus	-0.02 (-0.17, 0.13)
ZCML_adjusted	ASV102	-0.0242297	-0.233467	0.185008	0.10663	0.82029	1052	43.6312	0	0	100.25	Bacteria	Firmicutes	Negativicutes	Acidaminococcales	Acidaminococcaceae	Phascolarctobacterium	-0.02 (-0.23, 0.19)
ZCML_adjusted	ASV50	0.0162465	-0.130075	0.162568	0.0745674	0.827568	1052	89.5437	176.5	52	450	Bacteria	Firmicutes	Clostridia	Lachnospirales	Lachnospiraceae	Lachnospiraceae NK4A136 group	0.02 (-0.13, 0.16)
ZCML_adjusted	ASV19	0.0230964	-0.185546	0.231739	0.106327	0.82808	1052	77.5665	192.5	12	601	Bacteria	Actinobacteriota	Actinobacteria	Bifidobacteriales	Bifidobacteriaceae	Bifidobacterium	0.02 (-0.19, 0.23)
ZCML_adjusted	ASV186	-0.0182892	-0.183752	0.147173	0.084322	0.828332	1052	60.4563	16	0	51	Bacteria	Firmicutes	Clostridia	Oscillospirales	Oscillospiraceae	Intestinimonas	-0.02 (-0.18, 0.15)
ZCML_adjusted	ASV71	0.0180846	-0.14667	0.182839	0.0839611	0.829504	1052	80.3232	61	9	180.25	Bacteria	Bacteroidota	Bacteroidia	Bacteroidales	Tannerellaceae	Parabacteroides	0.02 (-0.15, 0.18)
ZCEL_adjusted	ASV537	0.013333	-0.108188	0.134854	0.0619288	0.82958	1052	17.3954	0	0	0	Bacteria	Firmicutes	Negativicutes	Veillonellales-Selenomonadales	Veillonellaceae	Veillonella	0.01 (-0.11, 0.13)
ZMGH1_adjusted	ASV30	-0.0252859	-0.261708	0.211137	0.120484	0.833811	1052	31.749	0	0	84.25	Bacteria	Firmicutes	Clostridia	Oscillospirales	Ruminococcaceae	CAG-352	-0.03 (-0.26, 0.21)
ZCEL_adjusted	ASV621	-0.0120132	-0.124715	0.100688	0.0574343	0.834361	1052	13.9734	0	0	0	Bacteria	Firmicutes	Clostridia	Lachnospirales	Lachnospiraceae	Eisenbergiella	-0.01 (-0.12, 0.1)
ZMGH1_adjusted	ASV146	-0.0202078	-0.210054	0.169638	0.0967483	0.834591	1052	46.8631	0	0	40	Bacteria	Firmicutes	Bacilli	Erysipelotrichales	Erysipelotrichaceae	Turicibacter	-0.02 (-0.21, 0.17)
ZCEL_adjusted	ASV330	0.0120837	-0.104037	0.128204	0.0591765	0.83824	1052	10.6464	0	0	0	Bacteria	Bacteroidota	Bacteroidia	Bacteroidales	Prevotellaceae	Prevotella_7	0.01 (-0.1, 0.13)
ZCEL_adjusted	ASV1099	-0.00633643	-0.067889	0.0552161	0.031368	0.839955	1052	3.51711	0	0	0	Bacteria	Firmicutes	Clostridia	Lachnospirales	Lachnospiraceae	Epulopiscium	-0.01 (-0.07, 0.06)
ZMGH1_adjusted	ASV4217	-0.00410929	-0.0441783	0.0359597	0.0204197	0.84055	1052	2.18631	0	0	0	Bacteria	Actinobacteriota	Coriobacteriia	Coriobacteriales	Atopobiaceae	Atopobium	0 (-0.04, 0.04)
ZCEL_adjusted	ASV503	-0.0108331	-0.122097	0.100431	0.0567017	0.848521	1052	10.4563	0	0	0	Bacteria	Firmicutes	Clostridia	Lachnospirales	Lachnospiraceae	Tuzzerella	-0.01 (-0.12, 0.1)
ZCML_adjusted	ASV3701	-0.00383331	-0.043441	0.0357744	0.0201846	0.849415	1052	1.9962	0	0	0	Bacteria	Bacteroidota	Bacteroidia	Bacteroidales	Marinifilaceae	Sanguibacteroides	0 (-0.04, 0.04)
ZMGH1_adjusted	ASV186	-0.0164304	-0.187671	0.15481	0.0872667	0.850696	1052	60.4563	16	0	51	Bacteria	Firmicutes	Clostridia	Oscillospirales	Oscillospiraceae	Intestinimonas	-0.02 (-0.19, 0.15)
ZMGH1_adjusted	ASV1015	0.00845318	-0.0797044	0.0966107	0.0449263	0.850791	1052	9.79087	0	0	0	Bacteria	Firmicutes	Clostridia	Peptostreptococcales-Tissierellales	Anaerovoracaceae	Mogibacterium	0.01 (-0.08, 0.1)
ZMGH1_adjusted	ASV251	-0.0149908	-0.175525	0.145544	0.0818106	0.854647	1052	60.076	8	0	32	Bacteria	Bacteroidota	Bacteroidia	Bacteroidales	Marinifilaceae	Odoribacter	-0.01 (-0.18, 0.15)
ZMGH1_adjusted	ASV46	-0.0178499	-0.21103	0.17533	0.0984473	0.856156	1052	72.1483	35	0	160.25	Bacteria	Firmicutes	Clostridia	Oscillospirales	Ruminococcaceae	[Eubacterium] siraeum group	-0.02 (-0.21, 0.18)
ZCEL_adjusted	ASV1368	0.00836239	-0.0828996	0.0996244	0.0465084	0.857342	1052	18.8213	0	0	0	Bacteria	Firmicutes	Clostridia	Oscillospirales	Ruminococcaceae	Candidatus Soleaferrea	0.01 (-0.08, 0.1)
ZMGH1_adjusted	ASV1397	0.00507805	-0.0504183	0.0605744	0.0282817	0.857539	1052	2.09125	0	0	0	Bacteria	Firmicutes	Bacilli	Lactobacillales	Lactobacillaceae	Lactiplantibacillus	0.01 (-0.05, 0.06)
ZCML_adjusted	ASV1553	-0.00663848	-0.0800022	0.0667253	0.0373872	0.859103	1052	7.03422	0	0	0	Bacteria	Actinobacteriota	Coriobacteriia	Coriobacteriales	Eggerthellaceae	Gordonibacter	-0.01 (-0.08, 0.07)
ZCEL_adjusted	ASV8	-0.0097213	-0.118167	0.0987243	0.0552654	0.860405	1052	96.673	653.5	319.75	1284.75	Bacteria	Firmicutes	Clostridia	Oscillospirales	Ruminococcaceae	Subdoligranulum	-0.01 (-0.12, 0.1)
ZCML_adjusted	ASV712	-0.0100425	-0.122426	0.102341	0.057272	0.860842	1052	21.3878	0	0	0	Bacteria	Firmicutes	Clostridia	Peptostreptococcales-Tissierellales	Anaerovoracaceae	[Eubacterium] brachy group	-0.01 (-0.12, 0.1)
ZCML_adjusted	ASV177	-0.00808152	-0.0999334	0.0837703	0.046809	0.862961	1052	4.18251	0	0	0	Bacteria	Firmicutes	Negativicutes	Acidaminococcales	Acidaminococcaceae	Succiniclasticum	-0.01 (-0.1, 0.08)
ZCML_adjusted	ASV242	-0.0145716	-0.181624	0.152481	0.0851325	0.864129	1052	40.3992	0	0	21	Bacteria	Firmicutes	Clostridia	Lachnospirales	Lachnospiraceae	Lachnospiraceae UCG-010	-0.01 (-0.18, 0.15)
ZCEL_adjusted	ASV706	0.0119943	-0.126421	0.150409	0.0705381	0.865012	1052	29.8479	0	0	11	Bacteria	Firmicutes	Clostridia	Oscillospirales	Oscillospiraceae	Oscillospira	0.01 (-0.13, 0.15)
ZMGH1_adjusted	ASV177	-0.00823004	-0.103289	0.086829	0.0484434	0.86513	1052	4.18251	0	0	0	Bacteria	Firmicutes	Negativicutes	Acidaminococcales	Acidaminococcaceae	Succiniclasticum	-0.01 (-0.1, 0.09)
ZMGH1_adjusted	ASV6	-0.00992184	-0.124611	0.104768	0.0584474	0.865235	1052	96.673	700	330.75	1266.25	Bacteria	Firmicutes	Clostridia	Lachnospirales	Lachnospiraceae	[Eubacterium] hallii group	-0.01 (-0.12, 0.1)
ZMGH1_adjusted	ASV712	0.00988213	-0.106425	0.126189	0.0592718	0.867619	1052	21.3878	0	0	0	Bacteria	Firmicutes	Clostridia	Peptostreptococcales-Tissierellales	Anaerovoracaceae	[Eubacterium] brachy group	0.01 (-0.11, 0.13)
ZCEL_adjusted	ASV447	0.00430023	-0.0468021	0.0554025	0.0260424	0.868879	1052	1.3308	0	0	0	Bacteria	Proteobacteria	Gammaproteobacteria	Enterobacterales	Enterobacteriaceae	Enterobacter	0 (-0.05, 0.06)
ZCML_adjusted	ASV2119	0.00582605	-0.0641783	0.0758304	0.0356752	0.870308	1052	9.5057	0	0	0	Bacteria	Firmicutes	Clostridia	Christensenellales	Christensenellaceae	Christensenella	0.01 (-0.06, 0.08)
ZCML_adjusted	ASV294	-0.0108895	-0.142414	0.120635	0.0670269	0.870972	1052	11.7871	0	0	0	Bacteria	Bacteroidota	Bacteroidia	Bacteroidales	Prevotellaceae	Alloprevotella	-0.01 (-0.14, 0.12)
ZCML_adjusted	ASV429	-0.00960584	-0.126165	0.106953	0.0594001	0.871562	1052	16.8251	0	0	0	Bacteria	Proteobacteria	Gammaproteobacteria	Enterobacterales	Pasteurellaceae	Haemophilus	-0.01 (-0.13, 0.11)
ZCML_adjusted	ASV813	-0.00988581	-0.130176	0.110404	0.0613016	0.871916	1052	21.3878	0	0	0	Bacteria	Firmicutes	Clostridia	Oscillospirales	Ruminococcaceae	Fournierella	-0.01 (-0.13, 0.11)
ZCEL_adjusted	ASV1268	0.00498111	-0.0565111	0.0664733	0.0313373	0.873738	1052	4.37262	0	0	0	Bacteria	Synergistota	Synergistia	Synergistales	Synergistaceae	Cloacibacillus	0 (-0.06, 0.07)
ZCML_adjusted	ASV303	-0.0131941	-0.178678	0.15229	0.084333	0.875707	1052	29.943	0	0	17	Bacteria	Desulfobacterota	Desulfovibrionia	Desulfovibrionales	Desulfovibrionaceae	Desulfovibrio	-0.01 (-0.18, 0.15)
ZCML_adjusted	ASV726	0.00856636	-0.0996199	0.116753	0.0551332	0.876556	1052	22.4335	0	0	0	Bacteria	Bacteroidota	Bacteroidia	Bacteroidales	Barnesiellaceae	Coprobacter	0.01 (-0.1, 0.12)
ZCEL_adjusted	ASV83	0.0108427	-0.128356	0.150041	0.0709375	0.878548	1052	87.4525	82.5	32	177	Bacteria	Firmicutes	Clostridia	Oscillospirales	Butyricicoccaceae	Butyricicoccus	0.01 (-0.13, 0.15)
ZCEL_adjusted	ASV2651	-0.00343016	-0.0477207	0.0408604	0.0225711	0.879239	1052	1.90114	0	0	0	Bacteria	Firmicutes	Clostridia	Lachnospirales	Lachnospiraceae	Lactonifactor	0 (-0.05, 0.04)
ZMGH1_adjusted	ASV589	-0.00704719	-0.0980635	0.0839691	0.0463832	0.879269	1052	4.65779	0	0	0	Bacteria	Firmicutes	Negativicutes	Veillonellales-Selenomonadales	Veillonellaceae	Megasphaera	-0.01 (-0.1, 0.08)
ZCML_adjusted	ASV1749	-0.00400065	-0.0566453	0.048644	0.0268284	0.881488	1052	3.23194	0	0	0	Bacteria	Actinobacteriota	Coriobacteriia	Coriobacteriales	Atopobiaceae	Coriobacteriaceae UCG-002	0 (-0.06, 0.05)
ZCEL_adjusted	ASV3559	0.00315375	-0.039201	0.0455085	0.0215846	0.883862	1052	3.89734	0	0	0	Bacteria	Firmicutes	Clostridia	Oscillospirales	Ethanoligenenaceae	Acetanaerobacterium	0 (-0.04, 0.05)
ZMGH1_adjusted	ASV3	-0.0181936	-0.265292	0.228905	0.125925	0.88515	1052	68.346	68.5	0	599	Bacteria	Proteobacteria	Gammaproteobacteria	Enterobacterales	Enterobacteriaceae	Escherichia-Shigella	-0.02 (-0.27, 0.23)
ZMGH1_adjusted	ASV1099	-0.00465206	-0.0689722	0.0596681	0.0327784	0.887167	1052	3.51711	0	0	0	Bacteria	Firmicutes	Clostridia	Lachnospirales	Lachnospiraceae	Epulopiscium	0 (-0.07, 0.06)
ZCEL_adjusted	ASV860	0.00629926	-0.0821355	0.094734	0.0450676	0.888866	1052	6.27376	0	0	0	Bacteria	Firmicutes	Negativicutes	Veillonellales-Selenomonadales	Selenomonadaceae	Mitsuokella	0.01 (-0.08, 0.09)
ZCML_adjusted	ASV4620	0.00263587	-0.0348735	0.0401452	0.0191153	0.890352	1052	1.61597	0	0	0	Bacteria	Firmicutes	Clostridia	Peptostreptococcales-Tissierellales	Family XI	Finegoldia	0 (-0.03, 0.04)
ZMGH1_adjusted	ASV768	-0.00896614	-0.140452	0.12252	0.067007	0.89358	1052	25.9506	0	0	4	Bacteria	Bacteroidota	Bacteroidia	Bacteroidales	Marinifilaceae	Butyricimonas	-0.01 (-0.14, 0.12)
ZMGH1_adjusted	ASV253	-0.00698992	-0.110121	0.0961407	0.0525568	0.894221	1052	9.31559	0	0	0	Bacteria	Firmicutes	Bacilli	Acholeplasmatales	Acholeplasmataceae	Anaeroplasma	-0.01 (-0.11, 0.1)
ZCML_adjusted	ASV27	-0.00681017	-0.108569	0.094949	0.0518579	0.895545	1052	97.1483	302.5	139.75	677.25	Bacteria	Firmicutes	Clostridia	Lachnospirales	Lachnospiraceae	[Ruminococcus] torques group	-0.01 (-0.11, 0.09)
ZMGH1_adjusted	ASV414	-0.00604223	-0.0998689	0.0877845	0.0478154	0.899467	1052	8.93536	0	0	0	Bacteria	Firmicutes	Bacilli	Lactobacillales	Lactobacillaceae	Latilactobacillus	-0.01 (-0.1, 0.09)
ZMGH1_adjusted	ASV1368	0.00602007	-0.0893452	0.101385	0.0485995	0.901441	1052	18.8213	0	0	0	Bacteria	Firmicutes	Clostridia	Oscillospirales	Ruminococcaceae	Candidatus Soleaferrea	0.01 (-0.09, 0.1)
ZCML_adjusted	ASV1568	-0.00610043	-0.10609	0.0938889	0.050956	0.904729	1052	19.2966	0	0	0	Bacteria	Firmicutes	Clostridia	Oscillospirales	Ruminococcaceae	Anaerotruncus	-0.01 (-0.11, 0.09)
ZCEL_adjusted	ASV378	-0.00887324	-0.154917	0.137171	0.0744259	0.905122	1052	41.0646	0	0	13	Bacteria	Firmicutes	Clostridia	Oscillospirales	Ruminococcaceae	DTU089	-0.01 (-0.15, 0.14)
ZCML_adjusted	ASV1630	-0.00249664	-0.0440871	0.0390938	0.0211951	0.906254	1052	1.14068	0	0	0	Bacteria	Bacteroidota	Bacteroidia	Bacteroidales	Rikenellaceae	Rikenella	0 (-0.04, 0.04)
ZCEL_adjusted	ASV151	-0.00911479	-0.165032	0.146802	0.0794575	0.908695	1052	64.5437	12	0	30	Bacteria	Firmicutes	Clostridia	Oscillospirales	Ruminococcaceae	UBA1819	-0.01 (-0.17, 0.15)
ZMGH1_adjusted	ASV19	0.0118828	-0.204049	0.227814	0.110042	0.914029	1052	77.5665	192.5	12	601	Bacteria	Actinobacteriota	Actinobacteria	Bifidobacteriales	Bifidobacteriaceae	Bifidobacterium	0.01 (-0.2, 0.23)
ZCEL_adjusted	ASV921	-0.00432133	-0.0834714	0.0748287	0.040336	0.914704	1052	6.36882	0	0	0	Bacteria	Firmicutes	Clostridia	Lachnospirales	Lachnospiraceae	Oribacterium	0 (-0.08, 0.07)
ZCML_adjusted	ASV166	0.00796688	-0.140307	0.156241	0.0755625	0.916052	1052	13.308	0	0	0	Bacteria	Firmicutes	Bacilli	Erysipelotrichales	Erysipelatoclostridiaceae	Catenibacterium	0.01 (-0.14, 0.16)
ZMGH1_adjusted	ASV264	0.00636489	-0.115812	0.128541	0.0622629	0.918597	1052	7.22433	0	0	0	Bacteria	Bacteroidota	Bacteroidia	Bacteroidales	Prevotellaceae	Prevotellaceae NK3B31 group	0.01 (-0.12, 0.13)
ZMGH1_adjusted	ASV1991	0.0036058	-0.0672142	0.0744258	0.0360909	0.920436	1052	9.69582	0	0	0	Bacteria	Firmicutes	Clostridia	Oscillospirales	Ruminococcaceae	Anaerofilum	0 (-0.07, 0.07)
ZCEL_adjusted	ASV576	-0.00527119	-0.109173	0.0986308	0.0529499	0.920721	1052	10.1711	0	0	0	Bacteria	Actinobacteriota	Coriobacteriia	Coriobacteriales	Eggerthellaceae	Eggerthella	-0.01 (-0.11, 0.1)
ZMGH1_adjusted	ASV53	0.0106211	-0.205872	0.227114	0.110328	0.923326	1052	36.9772	0	0	66	Bacteria	Firmicutes	Clostridia	Lachnospirales	Lachnospiraceae	[Eubacterium] ruminantium group	0.01 (-0.21, 0.23)
ZCEL_adjusted	ASV715	0.00250016	-0.0508517	0.055852	0.0271888	0.926751	1052	1.52091	0	0	0	Bacteria	Proteobacteria	Gammaproteobacteria	Enterobacterales	Hafniaceae	Hafnia-Obesumbacterium	0 (-0.05, 0.06)
ZMGH1_adjusted	ASV23	-0.00680238	-0.154247	0.140642	0.0751398	0.927884	1052	93.251	578	222.75	1222.25	Bacteria	Firmicutes	Clostridia	Oscillospirales	Ruminococcaceae	Ruminococcus	-0.01 (-0.15, 0.14)
ZMGH1_adjusted	ASV813	0.00530152	-0.11919	0.129793	0.0634426	0.933419	1052	21.3878	0	0	0	Bacteria	Firmicutes	Clostridia	Oscillospirales	Ruminococcaceae	Fournierella	0.01 (-0.12, 0.13)
ZCEL_adjusted	ASV1176	-0.00287051	-0.0711874	0.0654464	0.0348152	0.934305	1052	5.89354	0	0	0	Bacteria	Firmicutes	Clostridia	Peptostreptococcales-Tissierellales	Anaerovoracaceae	[Eubacterium] nodatum group	0 (-0.07, 0.07)
ZCEL_adjusted	ASV2894	-0.00209715	-0.0520286	0.0478343	0.0254458	0.934332	1052	6.46388	0	0	0	Bacteria	Firmicutes	Clostridia	Oscillospirales	Oscillospiraceae	Papillibacter	0 (-0.05, 0.05)
ZCML_adjusted	ASV2	0.00516985	-0.119144	0.129484	0.0633521	0.934977	1052	95.8175	859.5	385	1711.75	Bacteria	Firmicutes	Clostridia	Lachnospirales	Lachnospiraceae	Agathobacter	0.01 (-0.12, 0.13)
ZCML_adjusted	ASV10	-0.00429908	-0.107783	0.0991849	0.0527369	0.935045	1052	96.5779	424.5	214.75	800.5	Bacteria	Firmicutes	Clostridia	Lachnospirales	Lachnospiraceae	Dorea	0 (-0.11, 0.1)
ZCML_adjusted	ASV26	-0.00581633	-0.154383	0.142751	0.0757118	0.93878	1052	90.5894	335	104.75	814.25	Bacteria	Firmicutes	Clostridia	Oscillospirales	Oscillospiraceae	UCG-002	-0.01 (-0.15, 0.14)
ZCEL_adjusted	ASV30	0.00884371	-0.217412	0.2351	0.115303	0.938877	1052	31.749	0	0	84.25	Bacteria	Firmicutes	Clostridia	Oscillospirales	Ruminococcaceae	CAG-352	0.01 (-0.22, 0.24)
ZMGH1_adjusted	ASV1044	0.00230641	-0.0576411	0.0622539	0.0305501	0.939835	1052	1.80608	0	0	0	Bacteria	Firmicutes	Clostridia	Lachnospirales	Lachnospiraceae	Anaerosporobacter	0 (-0.06, 0.06)
ZMGH1_adjusted	ASV429	-0.00434544	-0.124975	0.116285	0.0614747	0.943661	1052	16.8251	0	0	0	Bacteria	Proteobacteria	Gammaproteobacteria	Enterobacterales	Pasteurellaceae	Haemophilus	0 (-0.12, 0.12)
ZCML_adjusted	ASV567	0.00502814	-0.139682	0.149739	0.0737464	0.945654	1052	32.9848	0	0	13	Bacteria	Firmicutes	Clostridia	Lachnospirales	Lachnospiraceae	Shuttleworthia	0.01 (-0.14, 0.15)
ZCML_adjusted	ASV1044	-0.00198964	-0.0599146	0.0559353	0.0295194	0.946275	1052	1.80608	0	0	0	Bacteria	Firmicutes	Clostridia	Lachnospirales	Lachnospiraceae	Anaerosporobacter	0 (-0.06, 0.06)
ZCML_adjusted	ASV1844	-0.00144824	-0.0452416	0.0423451	0.0223177	0.948273	1052	1.23574	0	0	0	Bacteria	Firmicutes	Bacilli	Lactobacillales	Lactobacillaceae	Weissella	0 (-0.05, 0.04)
ZCML_adjusted	ASV89	0.00624355	-0.18721	0.199697	0.0985867	0.949516	1052	54.8479	21	0	98.25	Bacteria	Firmicutes	Clostridia	Lachnospirales	Lachnospiraceae	CAG-56	0.01 (-0.19, 0.2)
ZMGH1_adjusted	ASV2152	-0.00178885	-0.0586076	0.0550299	0.0289556	0.950751	1052	5.41825	0	0	0	Bacteria	Verrucomicrobiota	Lentisphaeria	Victivallales	Victivallaceae	Victivallis	0 (-0.06, 0.06)
ZCEL_adjusted	ASV2211	-0.00233766	-0.0794517	0.0747764	0.0392984	0.952577	1052	7.98479	0	0	0	Bacteria	Firmicutes	Negativicutes	Veillonellales-Selenomonadales	Veillonellaceae	Allisonella	0 (-0.08, 0.07)
ZMGH1_adjusted	ASV2894	-0.00150433	-0.0536804	0.0506718	0.0265897	0.954894	1052	6.46388	0	0	0	Bacteria	Firmicutes	Clostridia	Oscillospirales	Oscillospiraceae	Papillibacter	0 (-0.05, 0.05)
ZCML_adjusted	ASV39	0.00425156	-0.144933	0.153436	0.0760266	0.955415	1052	86.5019	118	38.75	242.25	Bacteria	Firmicutes	Clostridia	Lachnospirales	Lachnospiraceae	Lachnospiraceae ND3007 group	0 (-0.14, 0.15)
ZCEL_adjusted	ASV20	-0.00259877	-0.09947	0.0942725	0.0493669	0.958027	1052	98.9544	1143.5	396.75	2518.75	Bacteria	Bacteroidota	Bacteroidia	Bacteroidales	Bacteroidaceae	Bacteroides	0 (-0.1, 0.09)
ZMGH1_adjusted	ASV135	0.0040624	-0.15717	0.165294	0.0821661	0.960577	1052	76.9962	41	8	93	Bacteria	Firmicutes	Clostridia	Lachnospirales	Lachnospiraceae	Lachnospiraceae FCS020 group	0 (-0.16, 0.17)
ZCML_adjusted	ASV65	0.00412221	-0.175677	0.183921	0.0916282	0.964125	1052	77.9468	82.5	12	260	Bacteria	Firmicutes	Clostridia	Lachnospirales	Lachnospiraceae	[Eubacterium] eligens group	0 (-0.18, 0.18)
ZCML_adjusted	ASV1513	0.00153013	-0.0667337	0.0697939	0.0347882	0.964925	1052	4.37262	0	0	0	Bacteria	Firmicutes	Bacilli	Erysipelotrichales	Erysipelotrichaceae	Faecalitalea	0 (-0.07, 0.07)
ZCEL_adjusted	ASV1991	0.00146675	-0.066307	0.0692405	0.0345384	0.966135	1052	9.69582	0	0	0	Bacteria	Firmicutes	Clostridia	Oscillospirales	Ruminococcaceae	Anaerofilum	0 (-0.07, 0.07)
ZMGH1_adjusted	ASV330	-0.00243974	-0.123782	0.118903	0.0618379	0.968536	1052	10.6464	0	0	0	Bacteria	Bacteroidota	Bacteroidia	Bacteroidales	Prevotellaceae	Prevotella_7	0 (-0.12, 0.12)
ZCEL_adjusted	ASV1553	0.00141166	-0.0712486	0.0740719	0.0370287	0.969597	1052	7.03422	0	0	0	Bacteria	Actinobacteriota	Coriobacteriia	Coriobacteriales	Eggerthellaceae	Gordonibacter	0 (-0.07, 0.07)
ZCEL_adjusted	ASV3648	-0.000792357	-0.0429202	0.0413355	0.0214689	0.970566	1052	2.75665	0	0	0	Bacteria	Firmicutes	Clostridia	Lachnospirales	Lachnospiraceae	GCA-900066755	0 (-0.04, 0.04)
ZMGH1_adjusted	ASV93	-0.00265789	-0.146229	0.140913	0.0731659	0.971029	1052	90.7795	143.5	48	318	Bacteria	Firmicutes	Clostridia	Lachnospirales	Lachnospiraceae	Lachnoclostridium	0 (-0.15, 0.14)
ZCML_adjusted	ASV201	-0.00301173	-0.172683	0.16666	0.086467	0.972221	1052	40.8745	0	0	34.25	Bacteria	Firmicutes	Clostridia	Lachnospirales	Lachnospiraceae	Lachnospiraceae UCG-001	0 (-0.17, 0.17)
ZCML_adjusted	ASV42	0.00335992	-0.196117	0.202836	0.101656	0.97364	1052	71.9582	57	0	302	Bacteria	Firmicutes	Clostridia	Clostridiales	Clostridiaceae	Clostridium sensu stricto 1	0 (-0.2, 0.2)
ZCEL_adjusted	ASV46	-0.00281905	-0.187692	0.182054	0.0942137	0.976135	1052	72.1483	35	0	160.25	Bacteria	Firmicutes	Clostridia	Oscillospirales	Ruminococcaceae	[Eubacterium] siraeum group	0 (-0.19, 0.18)
ZCEL_adjusted	ASV3701	-0.00059645	-0.0398244	0.0386315	0.0199911	0.976204	1052	1.9962	0	0	0	Bacteria	Bacteroidota	Bacteroidia	Bacteroidales	Marinifilaceae	Sanguibacteroides	0 (-0.04, 0.04)
ZCEL_adjusted	ASV1784	-0.00133999	-0.0955444	0.0928644	0.0480079	0.977738	1052	16.9202	0	0	0	Bacteria	Proteobacteria	Gammaproteobacteria	Burkholderiales	Oxalobacteraceae	Oxalobacter	0 (-0.1, 0.09)
ZCML_adjusted	ASV2152	-0.000766635	-0.0556685	0.0541353	0.0279788	0.978146	1052	5.41825	0	0	0	Bacteria	Verrucomicrobiota	Lentisphaeria	Victivallales	Victivallaceae	Victivallis	0 (-0.06, 0.05)
ZCEL_adjusted	ASV1481	0.000819208	-0.0732594	0.0748978	0.0377515	0.982691	1052	9.69582	0	0	0	Archaea	Euryarchaeota	Methanobacteria	Methanobacteriales	Methanobacteriaceae	Methanobrevibacter	0 (-0.07, 0.07)
ZCEL_adjusted	ASV102	-0.0022881	-0.209521	0.204945	0.105609	0.982719	1052	43.6312	0	0	100.25	Bacteria	Firmicutes	Negativicutes	Acidaminococcales	Acidaminococcaceae	Phascolarctobacterium	0 (-0.21, 0.2)
ZCEL_adjusted	ASV1812	-0.000606597	-0.0558942	0.054681	0.0281753	0.982828	1052	3.89734	0	0	0	Bacteria	Firmicutes	Clostridia	Eubacteriales	Eubacteriaceae	Eubacterium	0 (-0.06, 0.05)
ZMGH1_adjusted	ASV1568	-0.00112186	-0.104603	0.102359	0.0527355	0.983032	1052	19.2966	0	0	0	Bacteria	Firmicutes	Clostridia	Oscillospirales	Ruminococcaceae	Anaerotruncus	0 (-0.1, 0.1)
ZCML_adjusted	ASV1128	-0.00064527	-0.0663336	0.065043	0.0334757	0.984625	1052	3.04183	0	0	0	Bacteria	Bacteroidota	Bacteroidia	Bacteroidales	Prevotellaceae	Prevotella	0 (-0.07, 0.07)
ZMGH1_adjusted	ASV208	-0.00146399	-0.158299	0.155371	0.0799255	0.98539	1052	21.5779	0	0	0	Bacteria	Firmicutes	Bacilli	Lactobacillales	Lactobacillaceae	Lactobacillus	0 (-0.16, 0.16)
ZMGH1_adjusted	ASV358	-0.000514312	-0.0670312	0.0660026	0.0338979	0.987898	1052	3.80228	0	0	0	Bacteria	Proteobacteria	Gammaproteobacteria	Pseudomonadales	Pseudomonadaceae	Pseudomonas	0 (-0.07, 0.07)
ZCEL_adjusted	ASV201	-0.00125775	-0.1693	0.166784	0.0856366	0.988285	1052	40.8745	0	0	34.25	Bacteria	Firmicutes	Clostridia	Lachnospirales	Lachnospiraceae	Lachnospiraceae UCG-001	0 (-0.17, 0.17)
ZCML_adjusted	ASV83	0.00102069	-0.139529	0.141571	0.0716262	0.988633	1052	87.4525	82.5	32	177	Bacteria	Firmicutes	Clostridia	Oscillospirales	Butyricicoccaceae	Butyricicoccus	0 (-0.14, 0.14)
ZCEL_adjusted	ASV135	0.000853262	-0.153443	0.155149	0.0786315	0.991344	1052	76.9962	41	8	93	Bacteria	Firmicutes	Clostridia	Lachnospirales	Lachnospiraceae	Lachnospiraceae FCS020 group	0 (-0.15, 0.16)
ZMGH1_adjusted	ASV76	-0.000715653	-0.20121	0.199779	0.102175	0.994413	1052	49.4297	0	0	57.25	Bacteria	Verrucomicrobiota	Verrucomicrobiae	Verrucomicrobiales	Akkermansiaceae	Akkermansia	0 (-0.2, 0.2)
ZMGH1_adjusted	ASV503	0.000413601	-0.115854	0.116681	0.0592516	0.994432	1052	10.4563	0	0	0	Bacteria	Firmicutes	Clostridia	Lachnospirales	Lachnospiraceae	Tuzzerella	0 (-0.12, 0.12)
ZCEL_adjusted	ASV358	0.000163475	-0.063492	0.0638189	0.0324397	0.99598	1052	3.80228	0	0	0	Bacteria	Proteobacteria	Gammaproteobacteria	Pseudomonadales	Pseudomonadaceae	Pseudomonas	0 (-0.06, 0.06)
ZCML_adjusted	ASV7	-0.000218867	-0.1274	0.126962	0.0648132	0.997306	1052	94.3916	435	192.75	841.25	Bacteria	Firmicutes	Clostridia	Lachnospirales	Lachnospiraceae	Fusicatenibacter	0 (-0.13, 0.13)
ZCML_adjusted	ASV94	0.00019107	-0.144643	0.145026	0.0738097	0.997935	1052	86.1217	72	20	155.25	Bacteria	Firmicutes	Clostridia	Lachnospirales	Lachnospiraceae	[Eubacterium] ventriosum group	0 (-0.14, 0.15)
ZMGH1_adjusted	ASV20	-3.39169e-05	-0.10126	0.101192	0.0515862	0.999476	1052	98.9544	1143.5	396.75	2518.75	Bacteria	Bacteroidota	Bacteroidia	Bacteroidales	Bacteroidaceae	Bacteroides	0 (-0.1, 0.1)
ZMGH1_adjusted	ASV47	5.72493e-06	-0.180119	0.18013	0.091794	0.99995	1052	17.4905	0	0	0	Bacteria	Firmicutes	Clostridia	Lachnospirales	Lachnospiraceae	Butyrivibrio	0 (-0.18, 0.18)

## Sheet: suppl table 5
Factor	Taxon	Beta	CI95_L	CI95_U	Se	p	N	presence	median.count	IQR.L	IQR.U	Kingdom	Phylum	Class	Order	Family	Genus	95% CI
ZCEL_adjusted	ASV96	-0.339546	-0.526548	-0.152543	0.0952897	0.000384439	971	30.1751	0	0	31.5	Bacteria	Firmicutes	Clostridia	Peptostreptococcales-Tissierellales	Peptostreptococcaceae	Terrisporobacter	-0.34 (-0.53, -0.15)
ZCEL_adjusted	ASV10	0.158274	0.0548401	0.261707	0.0527059	0.00274374	971	96.8074	433	218	795	Bacteria	Firmicutes	Clostridia	Lachnospirales	Lachnospiraceae	Dorea	0.16 (0.05, 0.26)
ZCML_adjusted	ASV96	-0.280004	-0.470538	-0.0894707	0.0970889	0.00401529	971	30.1751	0	0	31.5	Bacteria	Firmicutes	Clostridia	Peptostreptococcales-Tissierellales	Peptostreptococcaceae	Terrisporobacter	-0.28 (-0.47, -0.09)
ZMGH1_adjusted	ASV10	0.158786	0.0503692	0.267202	0.0552451	0.0041408	971	96.8074	433	218	795	Bacteria	Firmicutes	Clostridia	Lachnospirales	Lachnospiraceae	Dorea	0.16 (0.05, 0.27)
ZMGH1_adjusted	ASV448	-0.161505	-0.282307	-0.0407038	0.0615561	0.00883719	971	15.9629	0	0	0	Bacteria	Firmicutes	Bacilli	Lactobacillales	Streptococcaceae	Lactococcus	-0.16 (-0.28, -0.04)
ZMGH1_adjusted	ASV387	0.130806	0.0298004	0.231812	0.0514688	0.0111969	971	4.94336	0	0	0	Bacteria	Proteobacteria	Gammaproteobacteria	Enterobacterales	Enterobacteriaceae	Klebsiella	0.13 (0.03, 0.23)
ZCEL_adjusted	ASV17	0.142877	0.0303484	0.255406	0.0573406	0.0128818	971	95.9835	514	242	1035	Bacteria	Firmicutes	Clostridia	Lachnospirales	Lachnospiraceae	Coprococcus	0.14 (0.03, 0.26)
ZCML_adjusted	ASV161	-0.145286	-0.262178	-0.0283953	0.0595635	0.0149025	971	6.69413	0	0	0	Bacteria	Bacteroidota	Bacteroidia	Bacteroidales	Muribaculaceae	CAG-873	-0.15 (-0.26, -0.03)
ZCML_adjusted	ASV3864	0.0453415	0.00779634	0.0828866	0.0191316	0.0179882	971	1.13285	0	0	0	Bacteria	Actinobacteriota	Actinobacteria	Micrococcales	Micrococcaceae	Rothia	0.05 (0.01, 0.08)
ZCML_adjusted	ASV701	-0.119527	-0.218864	-0.0201897	0.0506186	0.0184109	971	7.31205	0	0	0	Bacteria	Firmicutes	Clostridia	Lachnospirales	Lachnospiraceae	Frisingicoccus	-0.12 (-0.22, -0.02)
ZMGH1_adjusted	ASV96	-0.232608	-0.429291	-0.0359255	0.100222	0.020502	971	30.1751	0	0	31.5	Bacteria	Firmicutes	Clostridia	Peptostreptococcales-Tissierellales	Peptostreptococcaceae	Terrisporobacter	-0.23 (-0.43, -0.04)
ZCML_adjusted	ASV576	0.125682	0.0178444	0.23352	0.0549502	0.0224032	971	9.68074	0	0	0	Bacteria	Actinobacteriota	Coriobacteriia	Coriobacteriales	Eggerthellaceae	Eggerthella	0.13 (0.02, 0.23)
ZCML_adjusted	ASV2061	-0.0896661	-0.168904	-0.0104286	0.0403765	0.0266033	971	9.68074	0	0	0	Bacteria	Firmicutes	Clostridia	Oscillospirales	Ruminococcaceae	Caproiciproducens	-0.09 (-0.17, -0.01)
ZCML_adjusted	ASV540	-0.209129	-0.396458	-0.0218006	0.0954557	0.028705	971	45.0051	0	0	39.5	Bacteria	Bacteroidota	Bacteroidia	Bacteroidales	Barnesiellaceae	Barnesiella	-0.21 (-0.4, -0.02)
ZCML_adjusted	ASV17	0.126073	0.0115882	0.240557	0.0583371	0.0309365	971	95.9835	514	242	1035	Bacteria	Firmicutes	Clostridia	Lachnospirales	Lachnospiraceae	Coprococcus	0.13 (0.01, 0.24)
ZMGH1_adjusted	ASV123	-0.173608	-0.331287	-0.015929	0.0803474	0.0309667	971	84.861	76	15	205.5	Bacteria	Firmicutes	Clostridia	Oscillospirales	Oscillospiraceae	UCG-005	-0.17 (-0.33, -0.02)
ZCML_adjusted	ASV383	0.114903	0.00994855	0.219857	0.0534809	0.0319275	971	10.0927	0	0	0	Bacteria	Firmicutes	Clostridia	Lachnospirales	Lachnospiraceae	Hungatella	0.11 (0.01, 0.22)
ZCEL_adjusted	ASV597	-0.0942663	-0.181498	-0.00703415	0.0444503	0.0342046	971	6.07621	0	0	0	Bacteria	Firmicutes	Clostridia	Lachnospirales	Lachnospiraceae	Lachnospiraceae UCG-003	-0.09 (-0.18, -0.01)
ZMGH1_adjusted	ASV1	0.0780391	0.0040721	0.152006	0.0376909	0.0386749	971	99.4851	2422	1307.5	4269	Bacteria	Firmicutes	Clostridia	Lachnospirales	Lachnospiraceae	Blautia	0.08 (0, 0.15)
ZCEL_adjusted	ASV1024	0.106099	0.00553287	0.206665	0.0512447	0.0386814	971	18.3316	0	0	0	Bacteria	Patescibacteria	Saccharimonadia	Saccharimonadales	Saccharimonadaceae	TM7x	0.11 (0.01, 0.21)
ZMGH1_adjusted	ASV597	-0.0963322	-0.187741	-0.00492297	0.0465788	0.0388956	971	6.07621	0	0	0	Bacteria	Firmicutes	Clostridia	Lachnospirales	Lachnospiraceae	Lachnospiraceae UCG-003	-0.1 (-0.19, 0)
ZCEL_adjusted	ASV936	-0.151225	-0.296636	-0.00581381	0.0740963	0.041534	971	47.1679	0	0	13	Bacteria	Firmicutes	Clostridia	Oscillospirales	Ruminococcaceae	Paludicola	-0.15 (-0.3, -0.01)
ZMGH1_adjusted	ASV2250	0.0575792	0.00204611	0.113112	0.0282976	0.0421511	971	4.01648	0	0	0	Bacteria	Firmicutes	Bacilli	Lactobacillales	Carnobacteriaceae	Granulicatella	0.06 (0, 0.11)
ZCML_adjusted	ASV204	-0.160269	-0.315142	-0.0053966	0.0789174	0.0425486	971	75.7981	28	5	65	Bacteria	Firmicutes	Clostridia	Oscillospirales	Oscillospiraceae	Colidextribacter	-0.16 (-0.32, -0.01)
ZCEL_adjusted	ASV417	0.118725	0.00297591	0.234475	0.0589817	0.0444049	971	16.1689	0	0	0	Bacteria	Actinobacteriota	Coriobacteriia	Coriobacteriales	Eggerthellaceae	Slackia	0.12 (0, 0.23)
ZMGH1_adjusted	ASV542	-0.143674	-0.28442	-0.002927	0.0717193	0.0454313	971	14.5211	0	0	0	Bacteria	Firmicutes	Clostridia	Lachnospirales	Lachnospiraceae	Sellimonas	-0.14 (-0.28, 0)
ZCML_adjusted	ASV446	-0.140624	-0.27988	-0.00136714	0.07096	0.0477973	971	19.8764	0	0	0	Bacteria	Actinobacteriota	Coriobacteriia	Coriobacteriales	Eggerthellaceae	Enterorhabdus	-0.14 (-0.28, 0)
ZMGH1_adjusted	ASV197	0.181145	0.00157967	0.36071	0.0914998	0.0480223	971	25.9526	0	0	4	Bacteria	Firmicutes	Clostridia	Lachnospirales	Lachnospiraceae	Tyzzerella	0.18 (0, 0.36)
ZCEL_adjusted	ASV1204	0.0841	0.000525578	0.167674	0.0425865	0.0485794	971	6.1792	0	0	0	Bacteria	Firmicutes	Clostridia	Lachnospirales	Lachnospiraceae	FD2005	0.08 (0, 0.17)
ZCEL_adjusted	ASV701	-0.0983572	-0.196162	-0.000552279	0.0498378	0.0487229	971	7.31205	0	0	0	Bacteria	Firmicutes	Clostridia	Lachnospirales	Lachnospiraceae	Frisingicoccus	-0.1 (-0.2, 0)
ZMGH1_adjusted	ASV701	-0.102243	-0.204722	0.000237173	0.0522199	0.0505315	971	7.31205	0	0	0	Bacteria	Firmicutes	Clostridia	Lachnospirales	Lachnospiraceae	Frisingicoccus	-0.1 (-0.2, 0)
ZMGH1_adjusted	ASV2915	0.0600256	-0.0010368	0.121088	0.0311152	0.0540107	971	4.22245	0	0	0	Bacteria	Actinobacteriota	Actinobacteria	Actinomycetales	Actinomycetaceae	Actinomyces	0.06 (0, 0.12)
ZMGH1_adjusted	ASV3864	0.0379918	-0.000744501	0.0767282	0.0197386	0.0545595	971	1.13285	0	0	0	Bacteria	Actinobacteriota	Actinobacteria	Micrococcales	Micrococcaceae	Rothia	0.04 (0, 0.08)
ZCML_adjusted	ASV1534	-0.0995464	-0.201918	0.00282473	0.0521646	0.0566518	971	20.4943	0	0	0	Bacteria	Firmicutes	Clostridia	Oscillospirales	Butyricicoccaceae	UCG-009	-0.1 (-0.2, 0)
ZCEL_adjusted	ASV161	-0.111937	-0.227063	0.00318862	0.058664	0.0566782	971	6.69413	0	0	0	Bacteria	Bacteroidota	Bacteroidia	Bacteroidales	Muribaculaceae	CAG-873	-0.11 (-0.23, 0)
ZCEL_adjusted	ASV448	-0.11163	-0.227123	0.00386298	0.0588511	0.0581542	971	15.9629	0	0	0	Bacteria	Firmicutes	Bacilli	Lactobacillales	Streptococcaceae	Lactococcus	-0.11 (-0.23, 0)
ZCEL_adjusted	ASV229	-0.112234	-0.228442	0.00397337	0.0592152	0.0583476	971	10.9166	0	0	0	Bacteria	Firmicutes	Bacilli	Lactobacillales	Enterococcaceae	Enterococcus	-0.11 (-0.23, 0)
ZCEL_adjusted	ASV1	0.0681869	-0.00243405	0.138808	0.0359858	0.058419	971	99.4851	2422	1307.5	4269	Bacteria	Firmicutes	Clostridia	Lachnospirales	Lachnospiraceae	Blautia	0.07 (0, 0.14)
ZCEL_adjusted	ASV430	-0.134088	-0.274334	0.00615688	0.0714639	0.060919	971	35.3244	0	0	15	Bacteria	Firmicutes	Clostridia	Lachnospirales	Lachnospiraceae	GCA-900066575	-0.13 (-0.27, 0.01)
ZCEL_adjusted	ASV123	-0.142697	-0.293284	0.00788889	0.0767333	0.0632433	971	84.861	76	15	205.5	Bacteria	Firmicutes	Clostridia	Oscillospirales	Oscillospiraceae	UCG-005	-0.14 (-0.29, 0.01)
ZCML_adjusted	ASV32	0.18168	-0.0134048	0.376766	0.0994083	0.0679204	971	80.0206	74	11	321	Bacteria	Firmicutes	Bacilli	Lactobacillales	Streptococcaceae	Streptococcus	0.18 (-0.01, 0.38)
ZCML_adjusted	ASV918	0.070621	-0.00615467	0.147397	0.0391221	0.0713686	971	5.87024	0	0	0	Bacteria	Firmicutes	Bacilli	Lactobacillales	Lactobacillaceae	Lacticaseibacillus	0.07 (-0.01, 0.15)
ZMGH1_adjusted	ASV1534	-0.0964281	-0.201965	0.00910893	0.0537778	0.0732776	971	20.4943	0	0	0	Bacteria	Firmicutes	Clostridia	Oscillospirales	Butyricicoccaceae	UCG-009	-0.1 (-0.2, 0.01)
ZCEL_adjusted	ASV369	0.149626	-0.0153162	0.314567	0.0840483	0.0753573	971	42.3275	0	0	22	Bacteria	Firmicutes	Clostridia	Oscillospirales	Ruminococcaceae	Negativibacillus	0.15 (-0.02, 0.31)
ZCML_adjusted	ASV97	-0.146922	-0.309177	0.0153329	0.0826791	0.0758859	971	84.655	106	26	270	Bacteria	Firmicutes	Clostridia	Oscillospirales	Oscillospiraceae	NK4A214 group	-0.15 (-0.31, 0.02)
ZCEL_adjusted	ASV1396	-0.0923391	-0.194317	0.00963863	0.0519641	0.0758918	971	22.3481	0	0	0	Bacteria	Firmicutes	Bacilli	Erysipelotrichales	Erysipelotrichaceae	Holdemania	-0.09 (-0.19, 0.01)
ZCEL_adjusted	ASV538	0.113765	-0.0123141	0.239844	0.0642452	0.0769162	971	27.7034	0	0	4	Bacteria	Desulfobacterota	Desulfovibrionia	Desulfovibrionales	Desulfovibrionaceae	Bilophila	0.11 (-0.01, 0.24)
ZCEL_adjusted	ASV542	-0.12101	-0.255404	0.0133828	0.0684818	0.0775421	971	14.5211	0	0	0	Bacteria	Firmicutes	Clostridia	Lachnospirales	Lachnospiraceae	Sellimonas	-0.12 (-0.26, 0.01)
ZCML_adjusted	ASV176	-0.186648	-0.394185	0.0208898	0.105753	0.0778966	971	40.2678	0	0	60	Bacteria	Bacteroidota	Bacteroidia	Bacteroidales	Prevotellaceae	Paraprevotella	-0.19 (-0.39, 0.02)
ZMGH1_adjusted	ASV94	-0.135909	-0.289254	0.0174361	0.0781391	0.082302	971	86.6117	72	22	156	Bacteria	Firmicutes	Clostridia	Lachnospirales	Lachnospiraceae	[Eubacterium] ventriosum group	-0.14 (-0.29, 0.02)
ZCEL_adjusted	ASV104	0.189034	-0.0247323	0.402799	0.108927	0.0829923	971	39.4439	0	0	87.5	Bacteria	Firmicutes	Bacilli	Erysipelotrichales	Erysipelotrichaceae	Holdemanella	0.19 (-0.02, 0.4)
ZCML_adjusted	ASV417	0.103903	-0.0138283	0.221634	0.0599916	0.0836052	971	16.1689	0	0	0	Bacteria	Actinobacteriota	Coriobacteriia	Coriobacteriales	Eggerthellaceae	Slackia	0.1 (-0.01, 0.22)
ZMGH1_adjusted	ASV430	-0.129432	-0.276418	0.0175528	0.0748983	0.0842937	971	35.3244	0	0	15	Bacteria	Firmicutes	Clostridia	Lachnospirales	Lachnospiraceae	GCA-900066575	-0.13 (-0.28, 0.02)
ZCEL_adjusted	ASV35	-0.133564	-0.285627	0.0184987	0.0774857	0.0850824	971	90.5252	269	52	754	Bacteria	Firmicutes	Clostridia	Christensenellales	Christensenellaceae	Christensenellaceae R-7 group	-0.13 (-0.29, 0.02)
ZMGH1_adjusted	ASV665	0.127885	-0.0192241	0.274994	0.0749614	0.0883328	971	22.1421	0	0	0	Bacteria	Actinobacteriota	Coriobacteriia	Coriobacteriales	Eggerthellaceae	Adlercreutzia	0.13 (-0.02, 0.27)
ZMGH1_adjusted	ASV540	-0.164605	-0.357887	0.0286762	0.0984892	0.0949911	971	45.0051	0	0	39.5	Bacteria	Bacteroidota	Bacteroidia	Bacteroidales	Barnesiellaceae	Barnesiella	-0.16 (-0.36, 0.03)
ZMGH1_adjusted	ASV403	0.0778464	-0.0136333	0.169326	0.0466147	0.0952495	971	5.87024	0	0	0	Bacteria	Firmicutes	Bacilli	Lactobacillales	Lactobacillaceae	Limosilactobacillus	0.08 (-0.01, 0.17)
ZCEL_adjusted	ASV197	0.145819	-0.0256626	0.3173	0.0873806	0.0954911	971	25.9526	0	0	4	Bacteria	Firmicutes	Clostridia	Lachnospirales	Lachnospiraceae	Tyzzerella	0.15 (-0.03, 0.32)
ZMGH1_adjusted	ASV1204	0.0741163	-0.0135025	0.161735	0.0446473	0.0972366	971	6.1792	0	0	0	Bacteria	Firmicutes	Clostridia	Lachnospirales	Lachnospiraceae	FD2005	0.07 (-0.01, 0.16)
ZCML_adjusted	ASV378	-0.129687	-0.283108	0.0237335	0.0781776	0.0974702	971	41.0917	0	0	12	Bacteria	Firmicutes	Clostridia	Oscillospirales	Ruminococcaceae	DTU089	-0.13 (-0.28, 0.02)
ZMGH1_adjusted	ASV447	0.0459432	-0.00865507	0.100541	0.0278213	0.0989938	971	1.33883	0	0	0	Bacteria	Proteobacteria	Gammaproteobacteria	Enterobacterales	Enterobacteriaceae	Enterobacter	0.05 (-0.01, 0.1)
ZCML_adjusted	ASV2915	0.0497916	-0.00948361	0.109067	0.0302045	0.0995841	971	4.22245	0	0	0	Bacteria	Actinobacteriota	Actinobacteria	Actinomycetales	Actinomycetaceae	Actinomyces	0.05 (-0.01, 0.11)
ZMGH1_adjusted	ASV284	-0.0660436	-0.145046	0.012959	0.0402569	0.101221	971	2.36869	0	0	0	Bacteria	Firmicutes	Negativicutes	Veillonellales-Selenomonadales	Selenomonadaceae	Megamonas	-0.07 (-0.15, 0.01)
ZMGH1_adjusted	ASV1481	0.066618	-0.0132682	0.146504	0.0407071	0.102062	971	9.78373	0	0	0	Archaea	Euryarchaeota	Methanobacteria	Methanobacteriales	Methanobacteriaceae	Methanobrevibacter	0.07 (-0.01, 0.15)
ZCML_adjusted	ASV1329	0.0434374	-0.00925291	0.0961277	0.0268491	0.10603	971	1.95675	0	0	0	Bacteria	Firmicutes	Bacilli	Lactobacillales	Lactobacillaceae	Pediococcus	0.04 (-0.01, 0.1)
ZCEL_adjusted	ASV2250	0.0436273	-0.00941683	0.0966715	0.0270294	0.106844	971	4.01648	0	0	0	Bacteria	Firmicutes	Bacilli	Lactobacillales	Carnobacteriaceae	Granulicatella	0.04 (-0.01, 0.1)
ZMGH1_adjusted	ASV17	0.0962408	-0.0218887	0.21437	0.0601944	0.110191	971	95.9835	514	242	1035	Bacteria	Firmicutes	Clostridia	Lachnospirales	Lachnospiraceae	Coprococcus	0.1 (-0.02, 0.21)
ZMGH1_adjusted	ASV401	0.131662	-0.0317465	0.29507	0.0832669	0.114165	971	34.8095	0	0	10	Bacteria	Proteobacteria	Gammaproteobacteria	Burkholderiales	Sutterellaceae	Parasutterella	0.13 (-0.03, 0.3)
ZCEL_adjusted	ASV898	0.0677815	-0.0175126	0.153076	0.0434628	0.119204	971	6.9001	0	0	0	Bacteria	Firmicutes	Bacilli	Erysipelotrichales	Erysipelotrichaceae	Catenisphaera	0.07 (-0.02, 0.15)
ZCML_adjusted	ASV2211	0.0636671	-0.0165621	0.143896	0.0408819	0.119722	971	8.03296	0	0	0	Bacteria	Firmicutes	Negativicutes	Veillonellales-Selenomonadales	Veillonellaceae	Allisonella	0.06 (-0.02, 0.14)
ZMGH1_adjusted	ASV200	-0.0949309	-0.214736	0.0248739	0.0610482	0.120275	971	91.4521	47	18	96	Bacteria	Firmicutes	Clostridia	Peptostreptococcales-Tissierellales	Anaerovoracaceae	Family XIII AD3011 group	-0.09 (-0.21, 0.02)
ZCML_adjusted	ASV50	0.117841	-0.0311922	0.266874	0.0759418	0.121061	971	90.2163	180	55	454	Bacteria	Firmicutes	Clostridia	Lachnospirales	Lachnospiraceae	Lachnospiraceae NK4A136 group	0.12 (-0.03, 0.27)
ZMGH1_adjusted	ASV176	-0.167815	-0.381806	0.0461766	0.109042	0.12414	971	40.2678	0	0	60	Bacteria	Bacteroidota	Bacteroidia	Bacteroidales	Prevotellaceae	Paraprevotella	-0.17 (-0.38, 0.05)
ZMGH1_adjusted	ASV35	-0.124915	-0.284292	0.0344614	0.0812125	0.12435	971	90.5252	269	52	754	Bacteria	Firmicutes	Clostridia	Christensenellales	Christensenellaceae	Christensenellaceae R-7 group	-0.12 (-0.28, 0.03)
ZCEL_adjusted	ASV387	0.0753936	-0.0212156	0.172003	0.0492285	0.125978	971	4.94336	0	0	0	Bacteria	Proteobacteria	Gammaproteobacteria	Enterobacterales	Enterobacteriaceae	Klebsiella	0.08 (-0.02, 0.17)
ZCML_adjusted	ASV1368	0.0758992	-0.0214945	0.173293	0.0496282	0.12651	971	19.3615	0	0	0	Bacteria	Firmicutes	Clostridia	Oscillospirales	Ruminococcaceae	Candidatus Soleaferrea	0.08 (-0.02, 0.17)
ZCEL_adjusted	ASV71	0.129967	-0.0371005	0.297034	0.0851315	0.127178	971	81.1535	62	10	183	Bacteria	Bacteroidota	Bacteroidia	Bacteroidales	Tannerellaceae	Parabacteroides	0.13 (-0.04, 0.3)
ZCML_adjusted	ASV123	-0.118005	-0.27118	0.0351689	0.078052	0.130897	971	84.861	76	15	205.5	Bacteria	Firmicutes	Clostridia	Oscillospirales	Oscillospiraceae	UCG-005	-0.12 (-0.27, 0.04)
ZCML_adjusted	ASV229	-0.0909724	-0.209186	0.027241	0.0602372	0.131316	971	10.9166	0	0	0	Bacteria	Firmicutes	Bacilli	Lactobacillales	Enterococcaceae	Enterococcus	-0.09 (-0.21, 0.03)
ZCEL_adjusted	ASV159	0.132339	-0.04266	0.307337	0.0891729	0.138123	971	30.793	0	0	22	Bacteria	Actinobacteriota	Coriobacteriia	Coriobacteriales	Coriobacteriaceae	Collinsella	0.13 (-0.04, 0.31)
ZMGH1_adjusted	ASV102	-0.169418	-0.393625	0.0547897	0.114248	0.138434	971	43.9753	0	0	99.5	Bacteria	Firmicutes	Negativicutes	Acidaminococcales	Acidaminococcaceae	Phascolarctobacterium	-0.17 (-0.39, 0.05)
ZCML_adjusted	ASV554	-0.0702198	-0.163284	0.022844	0.0474219	0.139006	971	5.14933	0	0	0	Bacteria	Firmicutes	Clostridia	Lachnospirales	Lachnospiraceae	[Bacteroides] pectinophilus group	-0.07 (-0.16, 0.02)
ZMGH1_adjusted	ASV1062	-0.101591	-0.236913	0.0337305	0.0689551	0.141002	971	40.7827	0	0	8	Bacteria	Firmicutes	Clostridia	Lachnospirales	Defluviitaleaceae	Defluviitaleaceae UCG-011	-0.1 (-0.24, 0.03)
ZCEL_adjusted	ASV39	0.111813	-0.0382549	0.261881	0.0764691	0.144018	971	87.3326	118	39	246.5	Bacteria	Firmicutes	Clostridia	Lachnospirales	Lachnospiraceae	Lachnospiraceae ND3007 group	0.11 (-0.04, 0.26)
ZCML_adjusted	ASV3333	0.0281116	-0.00990135	0.0661245	0.01937	0.147028	971	1.5448	0	0	0	Bacteria	Firmicutes	Clostridia	Lachnospirales	Lachnospiraceae	CHKCI001	0.03 (-0.01, 0.07)
ZCML_adjusted	ASV538	0.0945653	-0.0336718	0.222802	0.0653449	0.148179	971	27.7034	0	0	4	Bacteria	Desulfobacterota	Desulfovibrionia	Desulfovibrionales	Desulfovibrionaceae	Bilophila	0.09 (-0.03, 0.22)
ZCEL_adjusted	ASV383	0.0760692	-0.0273125	0.179451	0.0526795	0.149069	971	10.0927	0	0	0	Bacteria	Firmicutes	Clostridia	Lachnospirales	Lachnospiraceae	Hungatella	0.08 (-0.03, 0.18)
ZCEL_adjusted	ASV82	0.181579	-0.0690401	0.432198	0.127706	0.155399	971	36.7662	0	0	178.5	Bacteria	Bacteroidota	Bacteroidia	Bacteroidales	Prevotellaceae	Prevotella_9	0.18 (-0.07, 0.43)
ZCEL_adjusted	ASV1534	-0.0727622	-0.173552	0.0280276	0.0513588	0.156886	971	20.4943	0	0	0	Bacteria	Firmicutes	Clostridia	Oscillospirales	Butyricicoccaceae	UCG-009	-0.07 (-0.17, 0.03)
ZMGH1_adjusted	ASV41	0.148509	-0.0581043	0.355122	0.105282	0.158698	971	74.8713	99	0	232	Bacteria	Firmicutes	Clostridia	Lachnospirales	Lachnospiraceae	[Ruminococcus] gauvreauii group	0.15 (-0.06, 0.36)
ZCEL_adjusted	ASV2040	-0.0477025	-0.114892	0.0194869	0.0342373	0.163858	971	9.06282	0	0	0	Bacteria	Firmicutes	Clostridia	Eubacteriales	Anaerofustaceae	Anaerofustis	-0.05 (-0.11, 0.02)
ZCEL_adjusted	ASV166	0.107834	-0.044163	0.259831	0.0774522	0.164167	971	13.3883	0	0	0	Bacteria	Firmicutes	Bacilli	Erysipelotrichales	Erysipelatoclostridiaceae	Catenibacterium	0.11 (-0.04, 0.26)
ZCEL_adjusted	ASV41	0.139823	-0.0573768	0.337023	0.100486	0.164408	971	74.8713	99	0	232	Bacteria	Firmicutes	Clostridia	Lachnospirales	Lachnospiraceae	[Ruminococcus] gauvreauii group	0.14 (-0.06, 0.34)
ZCEL_adjusted	ASV540	-0.130294	-0.314849	0.0542614	0.0940426	0.166232	971	45.0051	0	0	39.5	Bacteria	Bacteroidota	Bacteroidia	Bacteroidales	Barnesiellaceae	Barnesiella	-0.13 (-0.31, 0.05)
ZMGH1_adjusted	ASV383	0.0745256	-0.0338089	0.18286	0.0552033	0.177331	971	10.0927	0	0	0	Bacteria	Firmicutes	Clostridia	Lachnospirales	Lachnospiraceae	Hungatella	0.07 (-0.03, 0.18)
ZMGH1_adjusted	ASV2040	-0.04843	-0.118833	0.021973	0.0358748	0.177346	971	9.06282	0	0	0	Bacteria	Firmicutes	Clostridia	Eubacteriales	Anaerofustaceae	Anaerofustis	-0.05 (-0.12, 0.02)
ZCEL_adjusted	ASV176	-0.139924	-0.344221	0.0643723	0.104102	0.179235	971	40.2678	0	0	60	Bacteria	Bacteroidota	Bacteroidia	Bacteroidales	Prevotellaceae	Paraprevotella	-0.14 (-0.34, 0.06)
ZCEL_adjusted	ASV200	-0.0782505	-0.192631	0.0361298	0.0582841	0.179731	971	91.4521	47	18	96	Bacteria	Firmicutes	Clostridia	Peptostreptococcales-Tissierellales	Anaerovoracaceae	Family XIII AD3011 group	-0.08 (-0.19, 0.04)
ZCEL_adjusted	ASV113	-0.122318	-0.301442	0.0568066	0.0912751	0.180534	971	64.4696	27	0	91	Bacteria	Firmicutes	Clostridia	Lachnospirales	Lachnospiraceae	[Eubacterium] xylanophilum group	-0.12 (-0.3, 0.06)
ZCEL_adjusted	ASV481	-0.0637093	-0.157145	0.0297266	0.0476115	0.181182	971	6.48816	0	0	0	Bacteria	Firmicutes	Bacilli	Erysipelotrichales	Erysipelotrichaceae	Solobacterium	-0.06 (-0.16, 0.03)
ZCML_adjusted	ASV3537	0.0244124	-0.0114027	0.0602275	0.01825	0.181327	971	1.23584	0	0	0	Bacteria	Firmicutes	Bacilli	Erysipelotrichales	Erysipelotrichaceae	Dielma	0.02 (-0.01, 0.06)
ZMGH1_adjusted	ASV918	0.053404	-0.0257908	0.132599	0.0403548	0.186033	971	5.87024	0	0	0	Bacteria	Firmicutes	Bacilli	Lactobacillales	Lactobacillaceae	Lacticaseibacillus	0.05 (-0.03, 0.13)
ZMGH1_adjusted	ASV44	0.160069	-0.077339	0.397477	0.120975	0.186099	971	33.4706	0	0	86	Bacteria	Firmicutes	Negativicutes	Veillonellales-Selenomonadales	Veillonellaceae	Dialister	0.16 (-0.08, 0.4)
ZCEL_adjusted	ASV2965	0.0292957	-0.0146056	0.073197	0.0223705	0.190659	971	1.95675	0	0	0	Bacteria	Firmicutes	Clostridia	Peptostreptococcales-Tissierellales	Family XI	Fenollaria	0.03 (-0.01, 0.07)
ZCEL_adjusted	ASV930	-0.0562639	-0.140649	0.0281213	0.0429996	0.191029	971	9.88671	0	0	0	Bacteria	Firmicutes	Clostridia	Lachnospirales	Lachnospiraceae	[Eubacterium] fissicatena group	-0.06 (-0.14, 0.03)
ZCEL_adjusted	ASV489	-0.102355	-0.256197	0.0514877	0.0783925	0.191981	971	36.9722	0	0	11	Bacteria	Firmicutes	Bacilli	Erysipelotrichales	Erysipelatoclostridiaceae	Erysipelatoclostridium	-0.1 (-0.26, 0.05)
ZMGH1_adjusted	ASV196	0.08898	-0.0454133	0.223373	0.0684819	0.194149	971	9.68074	0	0	0	Bacteria	Firmicutes	Bacilli	Lactobacillales	Lactobacillaceae	Ligilactobacillus	0.09 (-0.05, 0.22)
ZMGH1_adjusted	ASV193	0.117833	-0.0605219	0.296187	0.090883	0.195107	971	51.4933	7	0	39	Bacteria	Firmicutes	Clostridia	Oscillospirales	Oscillospiraceae	UCG-003	0.12 (-0.06, 0.3)
ZCML_adjusted	ASV1204	0.0560358	-0.0290221	0.141094	0.0433424	0.196373	971	6.1792	0	0	0	Bacteria	Firmicutes	Clostridia	Lachnospirales	Lachnospiraceae	FD2005	0.06 (-0.03, 0.14)
ZMGH1_adjusted	ASV161	-0.0794039	-0.200154	0.0413461	0.0615298	0.197193	971	6.69413	0	0	0	Bacteria	Bacteroidota	Bacteroidia	Bacteroidales	Muribaculaceae	CAG-873	-0.08 (-0.2, 0.04)
ZCEL_adjusted	ASV264	0.0781682	-0.0420694	0.198406	0.0612687	0.202329	971	7.20906	0	0	0	Bacteria	Bacteroidota	Bacteroidia	Bacteroidales	Prevotellaceae	Prevotellaceae NK3B31 group	0.08 (-0.04, 0.2)
ZCML_adjusted	ASV8	-0.0720261	-0.18327	0.039218	0.0566859	0.204176	971	96.9104	667	324.5	1285.5	Bacteria	Firmicutes	Clostridia	Oscillospirales	Ruminococcaceae	Subdoligranulum	-0.07 (-0.18, 0.04)
ZCEL_adjusted	ASV76	-0.127148	-0.324834	0.0705379	0.100734	0.207179	971	49.8455	0	0	59.5	Bacteria	Verrucomicrobiota	Verrucomicrobiae	Verrucomicrobiales	Akkermansiaceae	Akkermansia	-0.13 (-0.32, 0.07)
ZCEL_adjusted	ASV146	-0.120393	-0.30772	0.0669334	0.0954548	0.207525	971	46.138	0	0	38	Bacteria	Firmicutes	Bacilli	Erysipelotrichales	Erysipelotrichaceae	Turicibacter	-0.12 (-0.31, 0.07)
ZMGH1_adjusted	ASV765	-0.0352765	-0.0902499	0.0196969	0.0280125	0.208226	971	1.5448	0	0	0	Bacteria	Proteobacteria	Gammaproteobacteria	Enterobacterales	Enterobacteriaceae	Citrobacter	-0.04 (-0.09, 0.02)
ZCML_adjusted	ASV330	-0.079511	-0.203774	0.0447517	0.0633197	0.209531	971	11.0196	0	0	0	Bacteria	Bacteroidota	Bacteroidia	Bacteroidales	Prevotellaceae	Prevotella_7	-0.08 (-0.2, 0.04)
ZMGH1_adjusted	ASV166	0.101293	-0.057996	0.260582	0.0811679	0.212358	971	13.3883	0	0	0	Bacteria	Firmicutes	Bacilli	Erysipelotrichales	Erysipelatoclostridiaceae	Catenibacterium	0.1 (-0.06, 0.26)
ZCEL_adjusted	ASV204	-0.0968142	-0.24937	0.0557413	0.0777367	0.213287	971	75.7981	28	5	65	Bacteria	Firmicutes	Clostridia	Oscillospirales	Oscillospiraceae	Colidextribacter	-0.1 (-0.25, 0.06)
ZCEL_adjusted	ASV2160	0.039396	-0.0228092	0.101601	0.0316975	0.214221	971	6.59114	0	0	0	Bacteria	Firmicutes	Clostridia	Oscillospirales	Ruminococcaceae	Phocea	0.04 (-0.02, 0.1)
ZCEL_adjusted	ASV1062	-0.081788	-0.210984	0.0474076	0.0658333	0.214414	971	40.7827	0	0	8	Bacteria	Firmicutes	Clostridia	Lachnospirales	Defluviitaleaceae	Defluviitaleaceae UCG-011	-0.08 (-0.21, 0.05)
ZMGH1_adjusted	ASV4620	0.0260224	-0.0152211	0.0672659	0.0210162	0.215945	971	1.64779	0	0	0	Bacteria	Firmicutes	Clostridia	Peptostreptococcales-Tissierellales	Family XI	Finegoldia	0.03 (-0.02, 0.07)
ZMGH1_adjusted	ASV204	-0.100587	-0.260431	0.0592576	0.0814508	0.217159	971	75.7981	28	5	65	Bacteria	Firmicutes	Clostridia	Oscillospirales	Oscillospiraceae	Colidextribacter	-0.1 (-0.26, 0.06)
ZCML_adjusted	ASV765	-0.0335606	-0.0868986	0.0197774	0.0271791	0.217212	971	1.5448	0	0	0	Bacteria	Proteobacteria	Gammaproteobacteria	Enterobacterales	Enterobacteriaceae	Citrobacter	-0.03 (-0.09, 0.02)
ZCEL_adjusted	ASV1513	0.0432105	-0.025757	0.112178	0.0351433	0.219169	971	4.11946	0	0	0	Bacteria	Firmicutes	Bacilli	Erysipelotrichales	Erysipelotrichaceae	Faecalitalea	0.04 (-0.03, 0.11)
ZCEL_adjusted	ASV97	-0.0999606	-0.25971	0.0597892	0.0814027	0.21976	971	84.655	106	26	270	Bacteria	Firmicutes	Clostridia	Oscillospirales	Oscillospiraceae	NK4A214 group	-0.1 (-0.26, 0.06)
ZCML_adjusted	ASV621	0.0726652	-0.0435864	0.188917	0.0592376	0.220249	971	13.8002	0	0	0	Bacteria	Firmicutes	Clostridia	Lachnospirales	Lachnospiraceae	Eisenbergiella	0.07 (-0.04, 0.19)
ZCEL_adjusted	ASV4217	-0.0230709	-0.0601184	0.0139767	0.0188781	0.221974	971	1.75077	0	0	0	Bacteria	Actinobacteriota	Coriobacteriia	Coriobacteriales	Atopobiaceae	Atopobium	-0.02 (-0.06, 0.01)
ZCEL_adjusted	ASV3864	0.0229402	-0.0140735	0.0599539	0.0188608	0.224176	971	1.13285	0	0	0	Bacteria	Actinobacteriota	Actinobacteria	Micrococcales	Micrococcaceae	Rothia	0.02 (-0.01, 0.06)
ZCEL_adjusted	ASV567	-0.0919713	-0.240962	0.0570197	0.0759204	0.226036	971	33.5736	0	0	13	Bacteria	Firmicutes	Clostridia	Lachnospirales	Lachnospiraceae	Shuttleworthia	-0.09 (-0.24, 0.06)
ZCEL_adjusted	ASV284	-0.0463395	-0.12179	0.0291107	0.0384467	0.22839	971	2.36869	0	0	0	Bacteria	Firmicutes	Negativicutes	Veillonellales-Selenomonadales	Selenomonadaceae	Megamonas	-0.05 (-0.12, 0.03)
ZCEL_adjusted	ASV554	-0.0561199	-0.147704	0.0354637	0.0466677	0.229453	971	5.14933	0	0	0	Bacteria	Firmicutes	Clostridia	Lachnospirales	Lachnospiraceae	[Bacteroides] pectinophilus group	-0.06 (-0.15, 0.04)
ZMGH1_adjusted	ASV286	0.102993	-0.0650845	0.271071	0.0856462	0.229453	971	27.2915	0	0	13	Bacteria	Firmicutes	Clostridia	Lachnospirales	Lachnospiraceae	Howardella	0.1 (-0.07, 0.27)
ZCML_adjusted	ASV597	-0.0541292	-0.142949	0.0346903	0.0452592	0.232002	971	6.07621	0	0	0	Bacteria	Firmicutes	Clostridia	Lachnospirales	Lachnospiraceae	Lachnospiraceae UCG-003	-0.05 (-0.14, 0.03)
ZMGH1_adjusted	ASV3537	0.0222979	-0.0146239	0.0592198	0.018814	0.236244	971	1.23584	0	0	0	Bacteria	Firmicutes	Bacilli	Erysipelotrichales	Erysipelotrichaceae	Dielma	0.02 (-0.01, 0.06)
ZCEL_adjusted	ASV768	0.0799812	-0.0528208	0.212783	0.067671	0.237537	971	27.2915	0	0	5	Bacteria	Bacteroidota	Bacteroidia	Bacteroidales	Marinifilaceae	Butyricimonas	0.08 (-0.05, 0.21)
ZCML_adjusted	ASV448	-0.0707547	-0.188296	0.0467869	0.0598949	0.237774	971	15.9629	0	0	0	Bacteria	Firmicutes	Bacilli	Lactobacillales	Streptococcaceae	Lactococcus	-0.07 (-0.19, 0.05)
ZCEL_adjusted	ASV1329	0.0309866	-0.0208792	0.0828524	0.0264289	0.24131	971	1.95675	0	0	0	Bacteria	Firmicutes	Bacilli	Lactobacillales	Lactobacillaceae	Pediococcus	0.03 (-0.02, 0.08)
ZMGH1_adjusted	ASV1396	-0.0638323	-0.170781	0.0431165	0.0544972	0.241774	971	22.3481	0	0	0	Bacteria	Firmicutes	Bacilli	Erysipelotrichales	Erysipelotrichaceae	Holdemania	-0.06 (-0.17, 0.04)
ZMGH1_adjusted	ASV3333	0.0233128	-0.0158823	0.0625078	0.0199724	0.243402	971	1.5448	0	0	0	Bacteria	Firmicutes	Clostridia	Lachnospirales	Lachnospiraceae	CHKCI001	0.02 (-0.02, 0.06)
ZCML_adjusted	ASV2965	0.0265488	-0.0180878	0.0711854	0.0227452	0.243411	971	1.95675	0	0	0	Bacteria	Firmicutes	Clostridia	Peptostreptococcales-Tissierellales	Family XI	Fenollaria	0.03 (-0.02, 0.07)
ZCML_adjusted	ASV98	0.107131	-0.0730053	0.287268	0.091791	0.243454	971	21.3182	0	0	0	Bacteria	Firmicutes	Clostridia	Lachnospirales	Lachnospiraceae	[Ruminococcus] gnavus group	0.11 (-0.07, 0.29)
ZCML_adjusted	ASV3648	0.0266346	-0.0182121	0.0714813	0.0228522	0.244104	971	2.88363	0	0	0	Bacteria	Firmicutes	Clostridia	Lachnospirales	Lachnospiraceae	GCA-900066755	0.03 (-0.02, 0.07)
ZMGH1_adjusted	ASV456	0.0981905	-0.0671723	0.263553	0.0842628	0.244195	971	23.275	0	0	0	Bacteria	Firmicutes	Clostridia	Peptococcales	Peptococcaceae	Peptococcus	0.1 (-0.07, 0.26)
ZCEL_adjusted	ASV401	0.0925697	-0.0634832	0.248623	0.0795189	0.244667	971	34.8095	0	0	10	Bacteria	Proteobacteria	Gammaproteobacteria	Burkholderiales	Sutterellaceae	Parasutterella	0.09 (-0.06, 0.25)
ZCML_adjusted	ASV1415	-0.0589541	-0.158455	0.0405469	0.0507021	0.245221	971	14.4181	0	0	0	Bacteria	Firmicutes	Bacilli	Erysipelotrichales	Erysipelotrichaceae	Merdibacter	-0.06 (-0.16, 0.04)
ZCEL_adjusted	ASV186	-0.100124	-0.269937	0.0696896	0.0865307	0.247526	971	61.0711	16	0	51	Bacteria	Firmicutes	Clostridia	Oscillospirales	Oscillospiraceae	Intestinimonas	-0.1 (-0.27, 0.07)
ZMGH1_adjusted	ASV1020	0.0259074	-0.0183447	0.0701596	0.0225493	0.250876	971	1.13285	0	0	0	Bacteria	Firmicutes	Bacilli	Lactobacillales	Lactobacillaceae	HT002	0.03 (-0.02, 0.07)
ZMGH1_adjusted	ASV39	0.0920791	-0.0652242	0.249382	0.080156	0.250949	971	87.3326	118	39	246.5	Bacteria	Firmicutes	Clostridia	Lachnospirales	Lachnospiraceae	Lachnospiraceae ND3007 group	0.09 (-0.07, 0.25)
ZCML_adjusted	ASV422	-0.0683962	-0.185552	0.0487591	0.0596981	0.252207	971	10.1957	0	0	0	Bacteria	Firmicutes	Negativicutes	Acidaminococcales	Acidaminococcaceae	Acidaminococcus	-0.07 (-0.19, 0.05)
ZCML_adjusted	ASV56	-0.0838652	-0.22826	0.0605297	0.0735784	0.254654	971	92.07	167	46	460	Bacteria	Bacteroidota	Bacteroidia	Bacteroidales	Rikenellaceae	Alistipes	-0.08 (-0.23, 0.06)
ZMGH1_adjusted	ASV1329	0.0309027	-0.0234441	0.0852494	0.0276931	0.264749	971	1.95675	0	0	0	Bacteria	Firmicutes	Bacilli	Lactobacillales	Lactobacillaceae	Pediococcus	0.03 (-0.02, 0.09)
ZCML_adjusted	ASV921	0.048139	-0.0366082	0.132886	0.0431841	0.265244	971	6.59114	0	0	0	Bacteria	Firmicutes	Clostridia	Lachnospirales	Lachnospiraceae	Oribacterium	0.05 (-0.04, 0.13)
ZCML_adjusted	ASV3	0.142476	-0.108418	0.39337	0.127846	0.265376	971	67.6622	65	0	601.5	Bacteria	Proteobacteria	Gammaproteobacteria	Enterobacterales	Enterobacteriaceae	Escherichia-Shigella	0.14 (-0.11, 0.39)
ZMGH1_adjusted	ASV898	0.0506907	-0.0387335	0.140115	0.0455673	0.266232	971	6.9001	0	0	0	Bacteria	Firmicutes	Bacilli	Erysipelotrichales	Erysipelotrichaceae	Catenisphaera	0.05 (-0.04, 0.14)
ZMGH1_adjusted	ASV65	-0.109257	-0.302439	0.0839244	0.0984384	0.26732	971	78.0639	83	13	261.5	Bacteria	Firmicutes	Clostridia	Lachnospirales	Lachnospiraceae	[Eubacterium] eligens group	-0.11 (-0.3, 0.08)
ZMGH1_adjusted	ASV434	0.0813476	-0.063118	0.225813	0.0736144	0.269418	971	24.0989	0	0	0	Bacteria	Firmicutes	Clostridia	Oscillospirales	Oscillospiraceae	Flavonifractor	0.08 (-0.06, 0.23)
ZCEL_adjusted	ASV429	-0.0667323	-0.18541	0.0519459	0.060474	0.270096	971	16.8898	0	0	0	Bacteria	Proteobacteria	Gammaproteobacteria	Enterobacterales	Pasteurellaceae	Haemophilus	-0.07 (-0.19, 0.05)
ZCML_adjusted	ASV768	0.0748812	-0.0601351	0.209898	0.0687994	0.276695	971	27.2915	0	0	5	Bacteria	Bacteroidota	Bacteroidia	Bacteroidales	Marinifilaceae	Butyricimonas	0.07 (-0.06, 0.21)
ZMGH1_adjusted	ASV1195	0.0540892	-0.0438665	0.152045	0.0499146	0.278802	971	15.9629	0	0	0	Bacteria	Firmicutes	Clostridia	Oscillospirales	Oscillospiraceae	UCG-007	0.05 (-0.04, 0.15)
ZMGH1_adjusted	ASV7	0.0734405	-0.0598156	0.206697	0.0679025	0.279723	971	94.8507	436	196	851.5	Bacteria	Firmicutes	Clostridia	Lachnospirales	Lachnospiraceae	Fusicatenibacter	0.07 (-0.06, 0.21)
ZCML_adjusted	ASV489	0.0861138	-0.0703206	0.242548	0.0797132	0.280285	971	36.9722	0	0	11	Bacteria	Firmicutes	Bacilli	Erysipelotrichales	Erysipelatoclostridiaceae	Erysipelatoclostridium	0.09 (-0.07, 0.24)
ZCML_adjusted	ASV2040	-0.0376026	-0.105933	0.0307274	0.0348185	0.280433	971	9.06282	0	0	0	Bacteria	Firmicutes	Clostridia	Eubacteriales	Anaerofustaceae	Anaerofustis	-0.04 (-0.11, 0.03)
ZCML_adjusted	ASV1749	-0.0294733	-0.0830509	0.0241042	0.0273011	0.28061	971	3.0896	0	0	0	Bacteria	Actinobacteriota	Coriobacteriia	Coriobacteriales	Atopobiaceae	Coriobacteriaceae UCG-002	-0.03 (-0.08, 0.02)
ZCML_adjusted	ASV159	0.097865	-0.0801288	0.275859	0.0906991	0.280858	971	30.793	0	0	22	Bacteria	Actinobacteriota	Coriobacteriia	Coriobacteriales	Coriobacteriaceae	Collinsella	0.1 (-0.08, 0.28)
ZCML_adjusted	ASV80	0.0954513	-0.0785888	0.269491	0.0886845	0.282065	971	79.7116	61	13	179	Bacteria	Firmicutes	Clostridia	Lachnospirales	Lachnospiraceae	Lachnospira	0.1 (-0.08, 0.27)
ZCML_adjusted	ASV1024	0.0559599	-0.0464399	0.15836	0.0521792	0.283788	971	18.3316	0	0	0	Bacteria	Patescibacteria	Saccharimonadia	Saccharimonadales	Saccharimonadaceae	TM7x	0.06 (-0.05, 0.16)
ZCML_adjusted	ASV503	-0.063496	-0.180065	0.0530732	0.0593994	0.285356	971	10.2987	0	0	0	Bacteria	Firmicutes	Clostridia	Lachnospirales	Lachnospiraceae	Tuzzerella	-0.06 (-0.18, 0.05)
ZCEL_adjusted	ASV403	0.047451	-0.0399343	0.134836	0.0445284	0.286859	971	5.87024	0	0	0	Bacteria	Firmicutes	Bacilli	Lactobacillales	Lactobacillaceae	Limosilactobacillus	0.05 (-0.04, 0.13)
ZCEL_adjusted	ASV640	-0.0366445	-0.104272	0.0309831	0.0344606	0.287882	971	2.78064	0	0	0	Bacteria	Firmicutes	Clostridia	Lachnospirales	Lachnospiraceae	Lachnospiraceae UCG-007	-0.04 (-0.1, 0.03)
ZCML_adjusted	ASV1396	0.0561771	-0.0476	0.159954	0.052881	0.288356	971	22.3481	0	0	0	Bacteria	Firmicutes	Bacilli	Erysipelotrichales	Erysipelotrichaceae	Holdemania	0.06 (-0.05, 0.16)
ZCML_adjusted	ASV77	0.0525624	-0.0449638	0.150089	0.0496958	0.290469	971	95.8805	80	36	156.5	Bacteria	Firmicutes	Clostridia	Oscillospirales	Ruminococcaceae	Incertae Sedis	0.05 (-0.04, 0.15)
ZCML_adjusted	ASV104	0.116657	-0.100866	0.33418	0.110842	0.292855	971	39.4439	0	0	87.5	Bacteria	Firmicutes	Bacilli	Erysipelotrichales	Erysipelotrichaceae	Holdemanella	0.12 (-0.1, 0.33)
ZMGH1_adjusted	ASV726	0.0628325	-0.0549538	0.180619	0.0600196	0.295427	971	23.275	0	0	0	Bacteria	Bacteroidota	Bacteroidia	Bacteroidales	Barnesiellaceae	Coprobacter	0.06 (-0.05, 0.18)
ZCEL_adjusted	ASV1020	0.0225197	-0.0197202	0.0647596	0.0215239	0.295705	971	1.13285	0	0	0	Bacteria	Firmicutes	Bacilli	Lactobacillales	Lactobacillaceae	HT002	0.02 (-0.02, 0.06)
ZCEL_adjusted	ASV94	-0.0771722	-0.223677	0.0693331	0.0746537	0.301523	971	86.6117	72	22	156	Bacteria	Firmicutes	Clostridia	Lachnospirales	Lachnospiraceae	[Eubacterium] ventriosum group	-0.08 (-0.22, 0.07)
ZMGH1_adjusted	ASV1513	0.0378031	-0.034476	0.110082	0.0368308	0.304965	971	4.11946	0	0	0	Bacteria	Firmicutes	Bacilli	Erysipelotrichales	Erysipelotrichaceae	Faecalitalea	0.04 (-0.03, 0.11)
ZCEL_adjusted	ASV177	-0.0494859	-0.144402	0.0454304	0.0483659	0.306494	971	4.22245	0	0	0	Bacteria	Firmicutes	Negativicutes	Acidaminococcales	Acidaminococcaceae	Succiniclasticum	-0.05 (-0.14, 0.05)
ZCEL_adjusted	ASV246	-0.0764979	-0.223553	0.0705577	0.0749341	0.307577	971	23.172	0	0	0	Bacteria	Firmicutes	Clostridia	Lachnospirales	Lachnospiraceae	Lachnospiraceae AC2044 group	-0.08 (-0.22, 0.07)
ZMGH1_adjusted	ASV1844	0.0243937	-0.0228739	0.0716613	0.0240858	0.311422	971	1.23584	0	0	0	Bacteria	Firmicutes	Bacilli	Lactobacillales	Lactobacillaceae	Weissella	0.02 (-0.02, 0.07)
ZMGH1_adjusted	ASV97	-0.0863731	-0.253796	0.0810495	0.0853124	0.311589	971	84.655	106	26	270	Bacteria	Firmicutes	Clostridia	Oscillospirales	Oscillospiraceae	NK4A214 group	-0.09 (-0.25, 0.08)
ZCML_adjusted	ASV33	-0.116803	-0.344545	0.110939	0.116049	0.314434	971	49.4336	0	0	137.5	Bacteria	Firmicutes	Clostridia	Peptostreptococcales-Tissierellales	Peptostreptococcaceae	Intestinibacter	-0.12 (-0.34, 0.11)
ZCEL_adjusted	ASV341	0.0239633	-0.0227804	0.0707069	0.0238188	0.314641	971	0.92688	0	0	0	Bacteria	Bacteroidota	Bacteroidia	Bacteroidales	Rikenellaceae	Rikenellaceae RC9 gut group	0.02 (-0.02, 0.07)
ZMGH1_adjusted	ASV930	-0.0452667	-0.133715	0.0431818	0.0450701	0.31546	971	9.88671	0	0	0	Bacteria	Firmicutes	Clostridia	Lachnospirales	Lachnospiraceae	[Eubacterium] fissicatena group	-0.05 (-0.13, 0.04)
ZCML_adjusted	ASV341	-0.023923	-0.0714416	0.0235957	0.0242138	0.323409	971	0.92688	0	0	0	Bacteria	Bacteroidota	Bacteroidia	Bacteroidales	Rikenellaceae	Rikenellaceae RC9 gut group	-0.02 (-0.07, 0.02)
ZMGH1_adjusted	ASV32	0.101138	-0.100186	0.302461	0.102587	0.324447	971	80.0206	74	11	321	Bacteria	Firmicutes	Bacilli	Lactobacillales	Streptococcaceae	Streptococcus	0.1 (-0.1, 0.3)
ZCEL_adjusted	ASV1015	0.0439674	-0.0435898	0.131525	0.044616	0.324647	971	9.68074	0	0	0	Bacteria	Firmicutes	Clostridia	Peptostreptococcales-Tissierellales	Anaerovoracaceae	Mogibacterium	0.04 (-0.04, 0.13)
ZCEL_adjusted	ASV765	-0.0262833	-0.0787678	0.0262012	0.0267442	0.325972	971	1.5448	0	0	0	Bacteria	Proteobacteria	Gammaproteobacteria	Enterobacterales	Enterobacteriaceae	Citrobacter	-0.03 (-0.08, 0.03)
ZCEL_adjusted	ASV3333	0.0186445	-0.0187718	0.0560607	0.019066	0.328376	971	1.5448	0	0	0	Bacteria	Firmicutes	Clostridia	Lachnospirales	Lachnospiraceae	CHKCI001	0.02 (-0.02, 0.06)
ZCML_adjusted	ASV2874	0.0278416	-0.0281811	0.0838643	0.0285471	0.329667	971	3.8105	0	0	0	Bacteria	Firmicutes	Clostridia	Oscillospirales	Ruminococcaceae	Pygmaiobacter	0.03 (-0.03, 0.08)
ZMGH1_adjusted	ASV1749	0.0274353	-0.027793	0.0826636	0.0281423	0.32987	971	3.0896	0	0	0	Bacteria	Actinobacteriota	Coriobacteriia	Coriobacteriales	Atopobiaceae	Coriobacteriaceae UCG-002	0.03 (-0.03, 0.08)
ZCEL_adjusted	ASV1415	-0.0481987	-0.1461	0.0497029	0.049887	0.334212	971	14.4181	0	0	0	Bacteria	Firmicutes	Bacilli	Erysipelotrichales	Erysipelotrichaceae	Merdibacter	-0.05 (-0.15, 0.05)
ZMGH1_adjusted	ASV489	-0.0788547	-0.240112	0.0824023	0.0821706	0.337478	971	36.9722	0	0	11	Bacteria	Firmicutes	Bacilli	Erysipelotrichales	Erysipelatoclostridiaceae	Erysipelatoclostridium	-0.08 (-0.24, 0.08)
ZMGH1_adjusted	ASV23	0.0725706	-0.0762603	0.221401	0.0758387	0.338858	971	93.8208	586	227	1210.5	Bacteria	Firmicutes	Clostridia	Oscillospirales	Ruminococcaceae	Ruminococcus	0.07 (-0.08, 0.22)
ZMGH1_adjusted	ASV71	0.0853331	-0.0898445	0.260511	0.0892641	0.339335	971	81.1535	62	10	183	Bacteria	Bacteroidota	Bacteroidia	Bacteroidales	Tannerellaceae	Parabacteroides	0.09 (-0.09, 0.26)
ZCEL_adjusted	ASV193	0.0825738	-0.0877197	0.252867	0.0867753	0.341551	971	51.4933	7	0	39	Bacteria	Firmicutes	Clostridia	Oscillospirales	Oscillospiraceae	UCG-003	0.08 (-0.09, 0.25)
ZMGH1_adjusted	ASV5	-0.0528525	-0.162293	0.0565877	0.0557667	0.343502	971	97.9403	1226	512.5	2543.5	Bacteria	Firmicutes	Clostridia	Oscillospirales	Ruminococcaceae	Faecalibacterium	-0.05 (-0.16, 0.06)
ZCML_adjusted	ASV35	-0.0743778	-0.229128	0.0803726	0.0788551	0.345808	971	90.5252	269	52	754	Bacteria	Firmicutes	Clostridia	Christensenellales	Christensenellaceae	Christensenellaceae R-7 group	-0.07 (-0.23, 0.08)
ZCML_adjusted	ASV193	0.08297	-0.0901456	0.256086	0.0882134	0.347169	971	51.4933	7	0	39	Bacteria	Firmicutes	Clostridia	Oscillospirales	Oscillospiraceae	UCG-003	0.08 (-0.09, 0.26)
ZCML_adjusted	ASV2250	0.025718	-0.0282537	0.0796897	0.027502	0.349958	971	4.01648	0	0	0	Bacteria	Firmicutes	Bacilli	Lactobacillales	Carnobacteriaceae	Granulicatella	0.03 (-0.03, 0.08)
ZCEL_adjusted	ASV65	-0.0876044	-0.272015	0.0968061	0.0939689	0.351433	971	78.0639	83	13	261.5	Bacteria	Firmicutes	Clostridia	Lachnospirales	Lachnospiraceae	[Eubacterium] eligens group	-0.09 (-0.27, 0.1)
ZCEL_adjusted	ASV813	0.0590215	-0.0655027	0.183546	0.063453	0.352524	971	22.0391	0	0	0	Bacteria	Firmicutes	Clostridia	Oscillospirales	Ruminococcaceae	Fournierella	0.06 (-0.07, 0.18)
ZCEL_adjusted	ASV196	0.0607634	-0.067559	0.189086	0.0653884	0.352986	971	9.68074	0	0	0	Bacteria	Firmicutes	Bacilli	Lactobacillales	Lactobacillaceae	Ligilactobacillus	0.06 (-0.07, 0.19)
ZMGH1_adjusted	ASV2061	-0.0386844	-0.120529	0.0431599	0.0417049	0.353863	971	9.68074	0	0	0	Bacteria	Firmicutes	Clostridia	Oscillospirales	Ruminococcaceae	Caproiciproducens	-0.04 (-0.12, 0.04)
ZMGH1_adjusted	ASV56	0.0701064	-0.0787555	0.218968	0.0758546	0.355606	971	92.07	167	46	460	Bacteria	Bacteroidota	Bacteroidia	Bacteroidales	Rikenellaceae	Alistipes	0.07 (-0.08, 0.22)
ZCEL_adjusted	ASV3	-0.116152	-0.363009	0.130705	0.125789	0.356042	971	67.6622	65	0	601.5	Bacteria	Proteobacteria	Gammaproteobacteria	Enterobacterales	Enterobacteriaceae	Escherichia-Shigella	-0.12 (-0.36, 0.13)
ZMGH1_adjusted	ASV1024	0.0493894	-0.0561705	0.154949	0.0537895	0.358748	971	18.3316	0	0	0	Bacteria	Patescibacteria	Saccharimonadia	Saccharimonadales	Saccharimonadaceae	TM7x	0.05 (-0.06, 0.15)
ZCML_adjusted	ASV294	-0.0635304	-0.199934	0.0728728	0.0695061	0.360935	971	11.5345	0	0	0	Bacteria	Bacteroidota	Bacteroidia	Bacteroidales	Prevotellaceae	Alloprevotella	-0.06 (-0.2, 0.07)
ZCML_adjusted	ASV151	0.0756012	-0.0883098	0.239512	0.0835231	0.365613	971	64.1607	12	0	29	Bacteria	Firmicutes	Clostridia	Oscillospirales	Ruminococcaceae	UBA1819	0.08 (-0.09, 0.24)
ZCEL_adjusted	ASV2119	0.0333713	-0.0390367	0.105779	0.0368965	0.365982	971	9.47477	0	0	0	Bacteria	Firmicutes	Clostridia	Christensenellales	Christensenellaceae	Christensenella	0.03 (-0.04, 0.11)
ZCEL_adjusted	ASV89	0.0912214	-0.107234	0.289677	0.101126	0.367254	971	55.2008	22	0	101.5	Bacteria	Firmicutes	Clostridia	Lachnospirales	Lachnospiraceae	CAG-56	0.09 (-0.11, 0.29)
ZMGH1_adjusted	ASV1415	-0.0471165	-0.149701	0.0554677	0.0522732	0.36763	971	14.4181	0	0	0	Bacteria	Firmicutes	Bacilli	Erysipelotrichales	Erysipelotrichaceae	Merdibacter	-0.05 (-0.15, 0.06)
ZCML_adjusted	ASV5	-0.0486142	-0.1548	0.0575718	0.0541085	0.369169	971	97.9403	1226	512.5	2543.5	Bacteria	Firmicutes	Clostridia	Oscillospirales	Ruminococcaceae	Faecalibacterium	-0.05 (-0.15, 0.06)
ZCEL_adjusted	ASV1929	-0.0309862	-0.0986713	0.0366989	0.0344899	0.369192	971	4.84037	0	0	0	Bacteria	Firmicutes	Clostridia	Lachnospirales	Lachnospiraceae	Lachnospiraceae NK4B4 group	-0.03 (-0.1, 0.04)
ZMGH1_adjusted	ASV538	0.0601856	-0.0720778	0.192449	0.0673966	0.37208	971	27.7034	0	0	4	Bacteria	Desulfobacterota	Desulfovibrionia	Desulfovibrionales	Desulfovibrionaceae	Bilophila	0.06 (-0.07, 0.19)
ZCML_adjusted	ASV430	0.0644382	-0.0783348	0.207211	0.0727519	0.37599	971	35.3244	0	0	15	Bacteria	Firmicutes	Clostridia	Lachnospirales	Lachnospiraceae	GCA-900066575	0.06 (-0.08, 0.21)
ZCEL_adjusted	ASV67	0.0537869	-0.0663483	0.173922	0.0612165	0.379822	971	92.482	76	29	143.5	Bacteria	Firmicutes	Clostridia	Monoglobales	Monoglobaceae	Monoglobus	0.05 (-0.07, 0.17)
ZCEL_adjusted	ASV3115	0.0212696	-0.0263232	0.0688623	0.0242515	0.380686	971	3.0896	0	0	0	Bacteria	Firmicutes	Bacilli	Lactobacillales	Lactobacillaceae	Leuconostoc	0.02 (-0.03, 0.07)
ZMGH1_adjusted	ASV567	-0.0688515	-0.225018	0.0873149	0.0795767	0.387135	971	33.5736	0	0	13	Bacteria	Firmicutes	Clostridia	Lachnospirales	Lachnospiraceae	Shuttleworthia	-0.07 (-0.23, 0.09)
ZCEL_adjusted	ASV283	0.0695982	-0.0883804	0.227577	0.0805001	0.387492	971	28.6303	0	0	14	Bacteria	Actinobacteriota	Coriobacteriia	Coriobacteriales	Eggerthellaceae	Senegalimassilia	0.07 (-0.09, 0.23)
ZCML_adjusted	ASV1762	-0.0260414	-0.0852854	0.0332026	0.0301886	0.388562	971	3.0896	0	0	0	Bacteria	Firmicutes	Clostridia	Oscillospirales	Hungateiclostridiaceae	Ruminiclostridium	-0.03 (-0.09, 0.03)
ZCML_adjusted	ASV542	0.0596594	-0.077131	0.19645	0.0697034	0.392267	971	14.5211	0	0	0	Bacteria	Firmicutes	Clostridia	Lachnospirales	Lachnospiraceae	Sellimonas	0.06 (-0.08, 0.2)
ZCEL_adjusted	ASV3537	0.0153473	-0.019904	0.0505985	0.0179627	0.393102	971	1.23584	0	0	0	Bacteria	Firmicutes	Bacilli	Erysipelotrichales	Erysipelotrichaceae	Dielma	0.02 (-0.02, 0.05)
ZCML_adjusted	ASV82	0.110586	-0.144357	0.365529	0.12991	0.394844	971	36.7662	0	0	178.5	Bacteria	Bacteroidota	Bacteroidia	Bacteroidales	Prevotellaceae	Prevotella_9	0.11 (-0.14, 0.37)
ZCEL_adjusted	ASV2915	0.0249525	-0.0334187	0.0833238	0.0297438	0.401728	971	4.22245	0	0	0	Bacteria	Actinobacteriota	Actinobacteria	Actinomycetales	Actinomycetaceae	Actinomyces	0.02 (-0.03, 0.08)
ZCEL_adjusted	ASV1551	0.0402964	-0.0545415	0.135134	0.0483259	0.404578	971	8.95984	0	0	0	Bacteria	Actinobacteriota	Coriobacteriia	Coriobacteriales	Atopobiaceae	Olsenella	0.04 (-0.05, 0.14)
ZMGH1_adjusted	ASV80	-0.0762107	-0.255637	0.103215	0.0914289	0.404743	971	79.7116	61	13	179	Bacteria	Firmicutes	Clostridia	Lachnospirales	Lachnospiraceae	Lachnospira	-0.08 (-0.26, 0.1)
ZMGH1_adjusted	ASV146	-0.0832602	-0.279627	0.113106	0.100061	0.405566	971	46.138	0	0	38	Bacteria	Firmicutes	Bacilli	Erysipelotrichales	Erysipelotrichaceae	Turicibacter	-0.08 (-0.28, 0.11)
ZCML_adjusted	ASV3559	0.0188716	-0.0258307	0.0635738	0.0227786	0.407609	971	3.91349	0	0	0	Bacteria	Firmicutes	Clostridia	Oscillospirales	Ethanoligenenaceae	Acetanaerobacterium	0.02 (-0.03, 0.06)
ZCEL_adjusted	ASV30	0.099915	-0.136798	0.336628	0.12062	0.407683	971	32.5438	0	0	100.5	Bacteria	Firmicutes	Clostridia	Oscillospirales	Ruminococcaceae	CAG-352	0.1 (-0.14, 0.34)
ZCEL_adjusted	ASV1031	-0.0344971	-0.11641	0.0474155	0.0417397	0.408738	971	7.31205	0	0	0	Bacteria	Firmicutes	Bacilli	Erysipelotrichales	Erysipelotrichaceae	[Clostridium] innocuum group	-0.03 (-0.12, 0.05)
ZMGH1_adjusted	ASV1128	-0.0308249	-0.104093	0.042443	0.0373347	0.409217	971	3.29557	0	0	0	Bacteria	Bacteroidota	Bacteroidia	Bacteroidales	Prevotellaceae	Prevotella	-0.03 (-0.1, 0.04)
ZCEL_adjusted	ASV2005	0.0176276	-0.024378	0.0596333	0.0214046	0.410404	971	1.23584	0	0	0	Bacteria	Proteobacteria	Gammaproteobacteria	Enterobacterales	Succinivibrionaceae	Succinivibrio	0.02 (-0.02, 0.06)
ZMGH1_adjusted	ASV422	-0.0506734	-0.171465	0.0701183	0.061551	0.410559	971	10.1957	0	0	0	Bacteria	Firmicutes	Negativicutes	Acidaminococcales	Acidaminococcaceae	Acidaminococcus	-0.05 (-0.17, 0.07)
ZMGH1_adjusted	ASV481	-0.0409256	-0.138882	0.0570306	0.0499149	0.412474	971	6.48816	0	0	0	Bacteria	Firmicutes	Bacilli	Erysipelotrichales	Erysipelotrichaceae	Solobacterium	-0.04 (-0.14, 0.06)
ZMGH1_adjusted	ASV3115	0.0206494	-0.0292194	0.0705182	0.0254113	0.416648	971	3.0896	0	0	0	Bacteria	Firmicutes	Bacilli	Lactobacillales	Lactobacillaceae	Leuconostoc	0.02 (-0.03, 0.07)
ZCML_adjusted	ASV76	-0.0832269	-0.284285	0.117832	0.102452	0.416795	971	49.8455	0	0	59.5	Bacteria	Verrucomicrobiota	Verrucomicrobiae	Verrucomicrobiales	Akkermansiaceae	Akkermansia	-0.08 (-0.28, 0.12)
ZCEL_adjusted	ASV712	0.0477239	-0.0677734	0.163221	0.0588532	0.417628	971	21.4212	0	0	0	Bacteria	Firmicutes	Clostridia	Peptostreptococcales-Tissierellales	Anaerovoracaceae	[Eubacterium] brachy group	0.05 (-0.07, 0.16)
ZCML_adjusted	ASV715	-0.0217166	-0.0744743	0.0310411	0.0268834	0.419404	971	1.23584	0	0	0	Bacteria	Proteobacteria	Gammaproteobacteria	Enterobacterales	Hafniaceae	Hafnia-Obesumbacterium	-0.02 (-0.07, 0.03)
ZCML_adjusted	ASV537	0.0522045	-0.074718	0.179127	0.0646751	0.419764	971	17.4047	0	0	0	Bacteria	Firmicutes	Negativicutes	Veillonellales-Selenomonadales	Veillonellaceae	Veillonella	0.05 (-0.07, 0.18)
ZCML_adjusted	ASV640	-0.02828	-0.0970449	0.040485	0.0350401	0.419826	971	2.78064	0	0	0	Bacteria	Firmicutes	Clostridia	Lachnospirales	Lachnospiraceae	Lachnospiraceae UCG-007	-0.03 (-0.1, 0.04)
ZMGH1_adjusted	ASV2	0.0544242	-0.0788027	0.187651	0.0678875	0.422938	971	95.8805	862	388	1685	Bacteria	Firmicutes	Clostridia	Lachnospirales	Lachnospiraceae	Agathobacter	0.05 (-0.08, 0.19)
ZMGH1_adjusted	ASV58	0.0818636	-0.118581	0.282308	0.102139	0.423048	971	72.6056	50	0	169	Bacteria	Firmicutes	Bacilli	Erysipelotrichales	Erysipelatoclostridiaceae	Erysipelotrichaceae UCG-003	0.08 (-0.12, 0.28)
ZCML_adjusted	ASV197	-0.0710489	-0.245567	0.103469	0.0889279	0.42452	971	25.9526	0	0	4	Bacteria	Firmicutes	Clostridia	Lachnospirales	Lachnospiraceae	Tyzzerella	-0.07 (-0.25, 0.1)
ZCEL_adjusted	ASV422	-0.0467495	-0.162037	0.0685384	0.0587465	0.426356	971	10.1957	0	0	0	Bacteria	Firmicutes	Negativicutes	Acidaminococcales	Acidaminococcaceae	Acidaminococcus	-0.05 (-0.16, 0.07)
ZCML_adjusted	ASV1784	-0.0412922	-0.143158	0.0605732	0.0519069	0.426519	971	17.9197	0	0	0	Bacteria	Proteobacteria	Gammaproteobacteria	Burkholderiales	Oxalobacteraceae	Oxalobacter	-0.04 (-0.14, 0.06)
ZCEL_adjusted	ASV2	0.0513128	-0.0758417	0.178467	0.0647933	0.42859	971	95.8805	862	388	1685	Bacteria	Firmicutes	Clostridia	Lachnospirales	Lachnospiraceae	Agathobacter	0.05 (-0.08, 0.18)
ZCEL_adjusted	ASV13	-0.0430165	-0.150235	0.0642016	0.0546344	0.431272	971	97.6313	474	207.5	941	Bacteria	Firmicutes	Clostridia	Lachnospirales	Lachnospiraceae	Anaerostipes	-0.04 (-0.15, 0.06)
ZCEL_adjusted	ASV208	-0.0613109	-0.214298	0.0916766	0.0779568	0.431787	971	21.0093	0	0	0	Bacteria	Firmicutes	Bacilli	Lactobacillales	Lactobacillaceae	Lactobacillus	-0.06 (-0.21, 0.09)
ZCEL_adjusted	ASV286	0.0641298	-0.0963559	0.224616	0.0817776	0.43312	971	27.2915	0	0	13	Bacteria	Firmicutes	Clostridia	Lachnospirales	Lachnospiraceae	Howardella	0.06 (-0.1, 0.22)
ZCEL_adjusted	ASV918	0.0300611	-0.045569	0.105691	0.0385383	0.435567	971	5.87024	0	0	0	Bacteria	Firmicutes	Bacilli	Lactobacillales	Lactobacillaceae	Lacticaseibacillus	0.03 (-0.05, 0.11)
ZCEL_adjusted	ASV93	0.0554215	-0.0843022	0.195145	0.0711981	0.436519	971	91.2461	142	48.5	313.5	Bacteria	Firmicutes	Clostridia	Lachnospirales	Lachnospiraceae	Lachnoclostridium	0.06 (-0.08, 0.2)
ZMGH1_adjusted	ASV2965	0.0182414	-0.0277836	0.0642664	0.0234527	0.436882	971	1.95675	0	0	0	Bacteria	Firmicutes	Clostridia	Peptostreptococcales-Tissierellales	Family XI	Fenollaria	0.02 (-0.03, 0.06)
ZCEL_adjusted	ASV7	0.0503482	-0.0768711	0.177568	0.0648263	0.437551	971	94.8507	436	196	851.5	Bacteria	Firmicutes	Clostridia	Lachnospirales	Lachnospiraceae	Fusicatenibacter	0.05 (-0.08, 0.18)
ZCEL_adjusted	ASV665	0.0555931	-0.0849801	0.196166	0.071631	0.437881	971	22.1421	0	0	0	Bacteria	Actinobacteriota	Coriobacteriia	Coriobacteriales	Eggerthellaceae	Adlercreutzia	0.06 (-0.08, 0.2)
ZCML_adjusted	ASV284	0.0302681	-0.0464661	0.107002	0.0391009	0.439063	971	2.36869	0	0	0	Bacteria	Firmicutes	Negativicutes	Veillonellales-Selenomonadales	Selenomonadaceae	Megamonas	0.03 (-0.05, 0.11)
ZCML_adjusted	ASV135	0.0640884	-0.0986964	0.226873	0.0829492	0.439938	971	76.828	42	8	93	Bacteria	Firmicutes	Clostridia	Lachnospirales	Lachnospiraceae	Lachnospiraceae FCS020 group	0.06 (-0.1, 0.23)
ZCML_adjusted	ASV47	-0.0726696	-0.257997	0.112658	0.0944359	0.441781	971	18.3316	0	0	0	Bacteria	Firmicutes	Clostridia	Lachnospirales	Lachnospiraceae	Butyrivibrio	-0.07 (-0.26, 0.11)
ZCML_adjusted	ASV706	0.0570872	-0.0892967	0.203471	0.0745919	0.444267	971	29.9691	0	0	11	Bacteria	Firmicutes	Clostridia	Oscillospirales	Oscillospiraceae	Oscillospira	0.06 (-0.09, 0.2)
ZCML_adjusted	ASV44	0.0898401	-0.140639	0.320319	0.117444	0.444484	971	33.4706	0	0	86	Bacteria	Firmicutes	Negativicutes	Veillonellales-Selenomonadales	Veillonellaceae	Dialister	0.09 (-0.14, 0.32)
ZCEL_adjusted	ASV456	0.0605778	-0.0973124	0.218468	0.0804551	0.451673	971	23.275	0	0	0	Bacteria	Firmicutes	Clostridia	Peptococcales	Peptococcaceae	Peptococcus	0.06 (-0.1, 0.22)
ZCML_adjusted	ASV286	0.0624937	-0.100654	0.225641	0.0831341	0.452405	971	27.2915	0	0	13	Bacteria	Firmicutes	Clostridia	Lachnospirales	Lachnospiraceae	Howardella	0.06 (-0.1, 0.23)
ZCEL_adjusted	ASV56	0.0543535	-0.087744	0.196451	0.0724077	0.453044	971	92.07	167	46	460	Bacteria	Bacteroidota	Bacteroidia	Bacteroidales	Rikenellaceae	Alistipes	0.05 (-0.09, 0.2)
ZCML_adjusted	ASV181	0.0688515	-0.111664	0.249367	0.0919843	0.454335	971	66.8383	31	0	83	Bacteria	Firmicutes	Clostridia	Lachnospirales	Lachnospiraceae	Marvinbryantia	0.07 (-0.11, 0.25)
ZCML_adjusted	ASV4620	0.0151187	-0.0249173	0.0551547	0.0204009	0.458827	971	1.64779	0	0	0	Bacteria	Firmicutes	Clostridia	Peptostreptococcales-Tissierellales	Family XI	Finegoldia	0.02 (-0.02, 0.06)
ZCML_adjusted	ASV1031	0.0309961	-0.0522797	0.114272	0.0424343	0.465296	971	7.31205	0	0	0	Bacteria	Firmicutes	Bacilli	Erysipelotrichales	Erysipelotrichaceae	[Clostridium] innocuum group	0.03 (-0.05, 0.11)
ZCEL_adjusted	ASV1195	0.0346496	-0.0588724	0.128172	0.0476554	0.467352	971	15.9629	0	0	0	Bacteria	Firmicutes	Clostridia	Oscillospirales	Oscillospiraceae	UCG-007	0.03 (-0.06, 0.13)
ZMGH1_adjusted	ASV26	-0.0580349	-0.215708	0.0996378	0.0803443	0.470271	971	90.9372	335	108.5	836	Bacteria	Firmicutes	Clostridia	Oscillospirales	Oscillospiraceae	UCG-002	-0.06 (-0.22, 0.1)
ZCEL_adjusted	ASV434	0.0504213	-0.0875099	0.188352	0.0702847	0.473312	971	24.0989	0	0	0	Bacteria	Firmicutes	Clostridia	Oscillospirales	Oscillospiraceae	Flavonifractor	0.05 (-0.09, 0.19)
ZMGH1_adjusted	ASV2211	-0.0301829	-0.112958	0.0525921	0.0421791	0.474421	971	8.03296	0	0	0	Bacteria	Firmicutes	Negativicutes	Veillonellales-Selenomonadales	Veillonellaceae	Allisonella	-0.03 (-0.11, 0.05)
ZMGH1_adjusted	ASV2160	0.0236976	-0.0415143	0.0889095	0.0332296	0.47593	971	6.59114	0	0	0	Bacteria	Firmicutes	Clostridia	Oscillospirales	Ruminococcaceae	Phocea	0.02 (-0.04, 0.09)
ZCEL_adjusted	ASV1630	-0.0151212	-0.056753	0.0265106	0.021214	0.476149	971	1.02987	0	0	0	Bacteria	Bacteroidota	Bacteroidia	Bacteroidales	Rikenellaceae	Rikenella	-0.02 (-0.06, 0.03)
ZCML_adjusted	ASV369	-0.0608513	-0.228759	0.107057	0.0855598	0.477127	971	42.3275	0	0	22	Bacteria	Firmicutes	Clostridia	Oscillospirales	Ruminococcaceae	Negativibacillus	-0.06 (-0.23, 0.11)
ZCEL_adjusted	ASV58	0.0689104	-0.122411	0.260232	0.0974904	0.479838	971	72.6056	50	0	169	Bacteria	Firmicutes	Bacilli	Erysipelotrichales	Erysipelatoclostridiaceae	Erysipelotrichaceae UCG-003	0.07 (-0.12, 0.26)
ZCEL_adjusted	ASV706	0.0517037	-0.0923022	0.19571	0.0733802	0.481231	971	29.9691	0	0	11	Bacteria	Firmicutes	Clostridia	Oscillospirales	Oscillospiraceae	Oscillospira	0.05 (-0.09, 0.2)
ZMGH1_adjusted	ASV303	-0.0639302	-0.242449	0.114589	0.0909669	0.482362	971	30.0721	0	0	18	Bacteria	Desulfobacterota	Desulfovibrionia	Desulfovibrionales	Desulfovibrionaceae	Desulfovibrio	-0.06 (-0.24, 0.11)
ZCEL_adjusted	ASV26	-0.0538795	-0.204367	0.0966077	0.0766828	0.48246	971	90.9372	335	108.5	836	Bacteria	Firmicutes	Clostridia	Oscillospirales	Oscillospiraceae	UCG-002	-0.05 (-0.2, 0.1)
ZCML_adjusted	ASV16	-0.0708189	-0.271503	0.129865	0.102261	0.488774	971	77.6519	103	9.5	328	Bacteria	Firmicutes	Clostridia	Peptostreptococcales-Tissierellales	Peptostreptococcaceae	Romboutsia	-0.07 (-0.27, 0.13)
ZCEL_adjusted	ASV4620	0.0137931	-0.0255923	0.0531784	0.0200693	0.49208	971	1.64779	0	0	0	Bacteria	Firmicutes	Clostridia	Peptostreptococcales-Tissierellales	Family XI	Finegoldia	0.01 (-0.03, 0.05)
ZCEL_adjusted	ASV294	-0.046931	-0.181138	0.0872757	0.0683868	0.492718	971	11.5345	0	0	0	Bacteria	Bacteroidota	Bacteroidia	Bacteroidales	Prevotellaceae	Alloprevotella	-0.05 (-0.18, 0.09)
ZCML_adjusted	ASV2101	-0.0286925	-0.111004	0.053619	0.041943	0.494088	971	8.4449	0	0	0	Bacteria	Firmicutes	Clostridia	Lachnospirales	Lachnospiraceae	Catenibacillus	-0.03 (-0.11, 0.05)
ZMGH1_adjusted	ASV715	-0.0188245	-0.073207	0.0355581	0.0277114	0.49711	971	1.23584	0	0	0	Bacteria	Proteobacteria	Gammaproteobacteria	Enterobacterales	Hafniaceae	Hafnia-Obesumbacterium	-0.02 (-0.07, 0.04)
ZCEL_adjusted	ASV1844	0.0156099	-0.0295164	0.0607362	0.0229947	0.497399	971	1.23584	0	0	0	Bacteria	Firmicutes	Bacilli	Lactobacillales	Lactobacillaceae	Weissella	0.02 (-0.03, 0.06)
ZCML_adjusted	ASV46	-0.0661459	-0.258936	0.126645	0.0982389	0.50091	971	73.0175	38	0	156	Bacteria	Firmicutes	Clostridia	Oscillospirales	Ruminococcaceae	[Eubacterium] siraeum group	-0.07 (-0.26, 0.13)
ZCML_adjusted	ASV40	0.0357769	-0.0687866	0.14034	0.0532817	0.502087	971	96.9104	364	177.5	665	Bacteria	Firmicutes	Clostridia	Lachnospirales	Lachnospiraceae	Roseburia	0.04 (-0.07, 0.14)
ZCML_adjusted	ASV53	0.0737998	-0.145696	0.293295	0.111847	0.509524	971	37.5901	0	0	66.5	Bacteria	Firmicutes	Clostridia	Lachnospirales	Lachnospiraceae	[Eubacterium] ruminantium group	0.07 (-0.15, 0.29)
ZMGH1_adjusted	ASV537	0.0439723	-0.0868609	0.174805	0.0666678	0.509688	971	17.4047	0	0	0	Bacteria	Firmicutes	Negativicutes	Veillonellales-Selenomonadales	Veillonellaceae	Veillonella	0.04 (-0.09, 0.17)
ZCML_adjusted	ASV186	-0.0578486	-0.230557	0.114859	0.0880057	0.511129	971	61.0711	16	0	51	Bacteria	Firmicutes	Clostridia	Oscillospirales	Oscillospiraceae	Intestinimonas	-0.06 (-0.23, 0.11)
ZCML_adjusted	ASV1	0.0240801	-0.0478296	0.0959897	0.0366425	0.511236	971	99.4851	2422	1307.5	4269	Bacteria	Firmicutes	Clostridia	Lachnospirales	Lachnospiraceae	Blautia	0.02 (-0.05, 0.1)
ZMGH1_adjusted	ASV2152	0.0195929	-0.0391806	0.0783665	0.0299489	0.513133	971	5.66426	0	0	0	Bacteria	Verrucomicrobiota	Lentisphaeria	Victivallales	Victivallaceae	Victivallis	0.02 (-0.04, 0.08)
ZMGH1_adjusted	ASV576	0.0369889	-0.0744396	0.148417	0.0567799	0.514918	971	9.68074	0	0	0	Bacteria	Actinobacteriota	Coriobacteriia	Coriobacteriales	Eggerthellaceae	Eggerthella	0.04 (-0.07, 0.15)
ZMGH1_adjusted	ASV3701	-0.0144286	-0.0583605	0.0295032	0.022386	0.519383	971	2.16272	0	0	0	Bacteria	Bacteroidota	Bacteroidia	Bacteroidales	Marinifilaceae	Sanguibacteroides	-0.01 (-0.06, 0.03)
ZCEL_adjusted	ASV2894	-0.0167243	-0.067657	0.0342083	0.0259534	0.519473	971	6.1792	0	0	0	Bacteria	Firmicutes	Clostridia	Oscillospirales	Oscillospiraceae	Papillibacter	-0.02 (-0.07, 0.03)
ZMGH1_adjusted	ASV1139	-0.0226315	-0.0916487	0.0463856	0.0351686	0.520045	971	4.42842	0	0	0	Bacteria	Firmicutes	Clostridia	Lachnospirales	Lachnospiraceae	Lachnospiraceae UCG-009	-0.02 (-0.09, 0.05)
ZCML_adjusted	ASV1020	0.0140567	-0.0288981	0.0570115	0.0218882	0.520894	971	1.13285	0	0	0	Bacteria	Firmicutes	Bacilli	Lactobacillales	Lactobacillaceae	HT002	0.01 (-0.03, 0.06)
ZMGH1_adjusted	ASV1630	-0.0142314	-0.0578539	0.0293911	0.0222284	0.522175	971	1.02987	0	0	0	Bacteria	Bacteroidota	Bacteroidia	Bacteroidales	Rikenellaceae	Rikenella	-0.01 (-0.06, 0.03)
ZCML_adjusted	ASV3567	-0.0145694	-0.0596922	0.0305534	0.0229929	0.526463	971	2.16272	0	0	0	Bacteria	Firmicutes	Bacilli	Erysipelotrichales	Erysipelotrichaceae	Faecalicoccus	-0.01 (-0.06, 0.03)
ZCEL_adjusted	ASV2872	-0.0144261	-0.0593139	0.0304616	0.0228731	0.528387	971	1.85376	0	0	0	Bacteria	Actinobacteriota	Actinobacteria	Bifidobacteriales	Bifidobacteriaceae	Alloscardovia	-0.01 (-0.06, 0.03)
ZMGH1_adjusted	ASV2005	-0.0141061	-0.0581247	0.0299125	0.0224303	0.529574	971	1.23584	0	0	0	Bacteria	Proteobacteria	Gammaproteobacteria	Enterobacterales	Succinivibrionaceae	Succinivibrio	-0.01 (-0.06, 0.03)
ZCML_adjusted	ASV930	-0.027437	-0.113279	0.0584052	0.0437421	0.530649	971	9.88671	0	0	0	Bacteria	Firmicutes	Clostridia	Lachnospirales	Lachnospiraceae	[Eubacterium] fissicatena group	-0.03 (-0.11, 0.06)
ZCML_adjusted	ASV264	0.0389924	-0.0833159	0.161301	0.0623239	0.5317	971	7.20906	0	0	0	Bacteria	Bacteroidota	Bacteroidia	Bacteroidales	Prevotellaceae	Prevotellaceae NK3B31 group	0.04 (-0.08, 0.16)
ZCEL_adjusted	ASV1044	-0.0194658	-0.0810625	0.042131	0.0313874	0.53529	971	1.95675	0	0	0	Bacteria	Firmicutes	Clostridia	Lachnospirales	Lachnospiraceae	Anaerosporobacter	-0.02 (-0.08, 0.04)
ZMGH1_adjusted	ASV417	0.0379734	-0.0835391	0.159486	0.0619183	0.539836	971	16.1689	0	0	0	Bacteria	Actinobacteriota	Coriobacteriia	Coriobacteriales	Eggerthellaceae	Slackia	0.04 (-0.08, 0.16)
ZCEL_adjusted	ASV47	-0.0567645	-0.239093	0.125564	0.0929081	0.541363	971	18.3316	0	0	0	Bacteria	Firmicutes	Clostridia	Lachnospirales	Lachnospiraceae	Butyrivibrio	-0.06 (-0.24, 0.13)
ZCEL_adjusted	ASV1128	-0.0215313	-0.0914708	0.0484083	0.0356386	0.545885	971	3.29557	0	0	0	Bacteria	Bacteroidota	Bacteroidia	Bacteroidales	Prevotellaceae	Prevotella	-0.02 (-0.09, 0.05)
ZMGH1_adjusted	ASV82	0.0803242	-0.182495	0.343143	0.133923	0.548797	971	36.7662	0	0	178.5	Bacteria	Bacteroidota	Bacteroidia	Bacteroidales	Prevotellaceae	Prevotella_9	0.08 (-0.18, 0.34)
ZMGH1_adjusted	ASV860	-0.0291026	-0.124445	0.0662395	0.0485829	0.549295	971	6.1792	0	0	0	Bacteria	Firmicutes	Negativicutes	Veillonellales-Selenomonadales	Selenomonadaceae	Mitsuokella	-0.03 (-0.12, 0.07)
ZMGH1_adjusted	ASV921	-0.0266599	-0.114049	0.0607292	0.0445303	0.549522	971	6.59114	0	0	0	Bacteria	Firmicutes	Clostridia	Lachnospirales	Lachnospiraceae	Oribacterium	-0.03 (-0.11, 0.06)
ZMGH1_adjusted	ASV201	-0.0555496	-0.237878	0.126779	0.092908	0.55005	971	41.4006	0	0	35	Bacteria	Firmicutes	Clostridia	Lachnospirales	Lachnospiraceae	Lachnospiraceae UCG-001	-0.06 (-0.24, 0.13)
ZMGH1_adjusted	ASV3648	-0.0140184	-0.0602661	0.0322293	0.0235661	0.552083	971	2.88363	0	0	0	Bacteria	Firmicutes	Clostridia	Lachnospirales	Lachnospiraceae	GCA-900066755	-0.01 (-0.06, 0.03)
ZMGH1_adjusted	ASV1553	0.0236692	-0.0552883	0.102627	0.0402339	0.556477	971	6.9001	0	0	0	Bacteria	Actinobacteriota	Coriobacteriia	Coriobacteriales	Eggerthellaceae	Gordonibacter	0.02 (-0.06, 0.1)
ZCML_adjusted	ASV67	-0.0359747	-0.158128	0.0861783	0.0622447	0.563431	971	92.482	76	29	143.5	Bacteria	Firmicutes	Clostridia	Monoglobales	Monoglobaceae	Monoglobus	-0.04 (-0.16, 0.09)
ZMGH1_adjusted	ASV2894	-0.0156481	-0.0690158	0.0377197	0.0271943	0.565145	971	6.1792	0	0	0	Bacteria	Firmicutes	Clostridia	Oscillospirales	Oscillospiraceae	Papillibacter	-0.02 (-0.07, 0.04)
ZMGH1_adjusted	ASV42	-0.0619504	-0.275769	0.151868	0.108954	0.569767	971	71.7817	56	0	289	Bacteria	Firmicutes	Clostridia	Clostridiales	Clostridiaceae	Clostridium sensu stricto 1	-0.06 (-0.28, 0.15)
ZCML_adjusted	ASV2152	-0.0164996	-0.073526	0.0405269	0.0290586	0.570302	971	5.66426	0	0	0	Bacteria	Verrucomicrobiota	Lentisphaeria	Victivallales	Victivallaceae	Victivallis	-0.02 (-0.07, 0.04)
ZMGH1_adjusted	ASV186	-0.051429	-0.229449	0.126591	0.0907123	0.570885	971	61.0711	16	0	51	Bacteria	Firmicutes	Clostridia	Oscillospirales	Oscillospiraceae	Intestinimonas	-0.05 (-0.23, 0.13)
ZMGH1_adjusted	ASV273	-0.0478734	-0.214639	0.118892	0.0849775	0.573319	971	66.4264	16	0	40.5	Bacteria	Firmicutes	Clostridia	Peptostreptococcales-Tissierellales	Anaerovoracaceae	Family XIII UCG-001	-0.05 (-0.21, 0.12)
ZMGH1_adjusted	ASV1762	-0.0174728	-0.078549	0.0436034	0.0311222	0.57464	971	3.0896	0	0	0	Bacteria	Firmicutes	Clostridia	Oscillospirales	Hungateiclostridiaceae	Ruminiclostridium	-0.02 (-0.08, 0.04)
ZMGH1_adjusted	ASV341	0.0137759	-0.0352186	0.0627704	0.0249658	0.581223	971	0.92688	0	0	0	Bacteria	Bacteroidota	Bacteroidia	Bacteroidales	Rikenellaceae	Rikenellaceae RC9 gut group	0.01 (-0.04, 0.06)
ZCEL_adjusted	ASV42	-0.0571542	-0.261228	0.146919	0.103988	0.582708	971	71.7817	56	0	289	Bacteria	Firmicutes	Clostridia	Clostridiales	Clostridiaceae	Clostridium sensu stricto 1	-0.06 (-0.26, 0.15)
ZCEL_adjusted	ASV102	-0.0598876	-0.274088	0.154312	0.109149	0.583354	971	43.9753	0	0	99.5	Bacteria	Firmicutes	Negativicutes	Acidaminococcales	Acidaminococcaceae	Phascolarctobacterium	-0.06 (-0.27, 0.15)
ZMGH1_adjusted	ASV229	-0.0340691	-0.156038	0.0878997	0.0621509	0.583705	971	10.9166	0	0	0	Bacteria	Firmicutes	Bacilli	Lactobacillales	Enterococcaceae	Enterococcus	-0.03 (-0.16, 0.09)
ZMGH1_adjusted	ASV242	-0.0505026	-0.231507	0.130502	0.0922334	0.584128	971	40.9887	0	0	21	Bacteria	Firmicutes	Clostridia	Lachnospirales	Lachnospiraceae	Lachnospiraceae UCG-010	-0.05 (-0.23, 0.13)
ZMGH1_adjusted	ASV1784	0.0292412	-0.0757694	0.134252	0.0535095	0.584873	971	17.9197	0	0	0	Bacteria	Proteobacteria	Gammaproteobacteria	Burkholderiales	Oxalobacteraceae	Oxalobacter	0.03 (-0.08, 0.13)
ZCEL_adjusted	ASV77	-0.0267246	-0.122703	0.0692541	0.0489073	0.584895	971	95.8805	80	36	156.5	Bacteria	Firmicutes	Clostridia	Oscillospirales	Ruminococcaceae	Incertae Sedis	-0.03 (-0.12, 0.07)
ZMGH1_adjusted	ASV1929	-0.0196882	-0.0906252	0.0512489	0.0361469	0.586108	971	4.84037	0	0	0	Bacteria	Firmicutes	Clostridia	Lachnospirales	Lachnospiraceae	Lachnospiraceae NK4B4 group	-0.02 (-0.09, 0.05)
ZCEL_adjusted	ASV1762	-0.0161338	-0.0744264	0.0421588	0.0297038	0.58715	971	3.0896	0	0	0	Bacteria	Firmicutes	Clostridia	Oscillospirales	Hungateiclostridiaceae	Ruminiclostridium	-0.02 (-0.07, 0.04)
ZMGH1_adjusted	ASV429	-0.0343664	-0.158774	0.0900406	0.0633933	0.587867	971	16.8898	0	0	0	Bacteria	Proteobacteria	Gammaproteobacteria	Enterobacterales	Pasteurellaceae	Haemophilus	-0.03 (-0.16, 0.09)
ZCML_adjusted	ASV665	0.0387687	-0.104156	0.181694	0.0728294	0.594627	971	22.1421	0	0	0	Bacteria	Actinobacteriota	Coriobacteriia	Coriobacteriales	Eggerthellaceae	Adlercreutzia	0.04 (-0.1, 0.18)
ZCML_adjusted	ASV93	0.038495	-0.103567	0.180557	0.0723895	0.595006	971	91.2461	142	48.5	313.5	Bacteria	Firmicutes	Clostridia	Lachnospirales	Lachnospiraceae	Lachnoclostridium	0.04 (-0.1, 0.18)
ZCEL_adjusted	ASV303	0.0460977	-0.124302	0.216498	0.0868297	0.595614	971	30.0721	0	0	18	Bacteria	Desulfobacterota	Desulfovibrionia	Desulfovibrionales	Desulfovibrionaceae	Desulfovibrio	0.05 (-0.12, 0.22)
ZMGH1_adjusted	ASV181	-0.0501915	-0.236276	0.135893	0.0948216	0.596704	971	66.8383	31	0	83	Bacteria	Firmicutes	Clostridia	Lachnospirales	Lachnospiraceae	Marvinbryantia	-0.05 (-0.24, 0.14)
ZCML_adjusted	ASV813	0.034058	-0.0925674	0.160683	0.0645237	0.597736	971	22.0391	0	0	0	Bacteria	Firmicutes	Clostridia	Oscillospirales	Ruminococcaceae	Fournierella	0.03 (-0.09, 0.16)
ZMGH1_adjusted	ASV1368	0.0267027	-0.0737896	0.127195	0.0512072	0.602165	971	19.3615	0	0	0	Bacteria	Firmicutes	Clostridia	Oscillospirales	Ruminococcaceae	Candidatus Soleaferrea	0.03 (-0.07, 0.13)
ZCML_adjusted	ASV102	-0.0574562	-0.275207	0.160295	0.110958	0.604705	971	43.9753	0	0	99.5	Bacteria	Firmicutes	Negativicutes	Acidaminococcales	Acidaminococcaceae	Phascolarctobacterium	-0.06 (-0.28, 0.16)
ZCML_adjusted	ASV200	-0.030143	-0.146512	0.086226	0.0592974	0.611336	971	91.4521	47	18	96	Bacteria	Firmicutes	Clostridia	Peptostreptococcales-Tissierellales	Anaerovoracaceae	Family XIII AD3011 group	-0.03 (-0.15, 0.09)
ZMGH1_adjusted	ASV1015	0.023623	-0.0681508	0.115397	0.0467646	0.613572	971	9.68074	0	0	0	Bacteria	Firmicutes	Clostridia	Peptostreptococcales-Tissierellales	Anaerovoracaceae	Mogibacterium	0.02 (-0.07, 0.12)
ZCEL_adjusted	ASV1568	0.0262957	-0.0759628	0.128554	0.0521072	0.613924	971	19.2585	0	0	0	Bacteria	Firmicutes	Clostridia	Oscillospirales	Ruminococcaceae	Anaerotruncus	0.03 (-0.08, 0.13)
ZCML_adjusted	ASV27	-0.0266062	-0.130909	0.0776968	0.053149	0.616771	971	97.3223	302	141	660	Bacteria	Firmicutes	Clostridia	Lachnospirales	Lachnospiraceae	[Ruminococcus] torques group	-0.03 (-0.13, 0.08)
ZCEL_adjusted	ASV33	-0.0568641	-0.280986	0.167258	0.114205	0.61866	971	49.4336	0	0	137.5	Bacteria	Firmicutes	Clostridia	Peptostreptococcales-Tissierellales	Peptostreptococcaceae	Intestinibacter	-0.06 (-0.28, 0.17)
ZCML_adjusted	ASV1268	-0.0165565	-0.0820261	0.048913	0.0333609	0.619808	971	4.42842	0	0	0	Bacteria	Synergistota	Synergistia	Synergistales	Synergistaceae	Cloacibacillus	-0.02 (-0.08, 0.05)
ZMGH1_adjusted	ASV355	-0.0442619	-0.219654	0.13113	0.0893732	0.62054	971	37.0752	0	0	19	Bacteria	Proteobacteria	Gammaproteobacteria	Burkholderiales	Sutterellaceae	Sutterella	-0.04 (-0.22, 0.13)
ZCEL_adjusted	ASV98	0.0435993	-0.133708	0.220907	0.0903493	0.629517	971	21.3182	0	0	0	Bacteria	Firmicutes	Clostridia	Lachnospirales	Lachnospiraceae	[Ruminococcus] gnavus group	0.04 (-0.13, 0.22)
ZCML_adjusted	ASV208	0.0382102	-0.117342	0.193763	0.079264	0.629872	971	21.0093	0	0	0	Bacteria	Firmicutes	Bacilli	Lactobacillales	Lactobacillaceae	Lactobacillus	0.04 (-0.12, 0.19)
ZCEL_adjusted	ASV1139	-0.0161045	-0.0819818	0.0497728	0.0335687	0.631516	971	4.42842	0	0	0	Bacteria	Firmicutes	Clostridia	Lachnospirales	Lachnospiraceae	Lachnospiraceae UCG-009	-0.02 (-0.08, 0.05)
ZCEL_adjusted	ASV80	-0.041687	-0.212976	0.129602	0.0872824	0.633037	971	79.7116	61	13	179	Bacteria	Firmicutes	Clostridia	Lachnospirales	Lachnospiraceae	Lachnospira	-0.04 (-0.21, 0.13)
ZMGH1_adjusted	ASV1268	0.0163675	-0.0511123	0.0838474	0.0343853	0.63418	971	4.42842	0	0	0	Bacteria	Synergistota	Synergistia	Synergistales	Synergistaceae	Cloacibacillus	0.02 (-0.05, 0.08)
ZCEL_adjusted	ASV726	0.0271291	-0.0853394	0.139598	0.0573098	0.636054	971	23.275	0	0	0	Bacteria	Bacteroidota	Bacteroidia	Bacteroidales	Barnesiellaceae	Coprobacter	0.03 (-0.09, 0.14)
ZMGH1_adjusted	ASV30	0.0598068	-0.188272	0.307886	0.126412	0.636244	971	32.5438	0	0	100.5	Bacteria	Firmicutes	Clostridia	Oscillospirales	Ruminococcaceae	CAG-352	0.06 (-0.19, 0.31)
ZCML_adjusted	ASV447	-0.0127788	-0.0658208	0.0402632	0.0270283	0.636469	971	1.33883	0	0	0	Bacteria	Proteobacteria	Gammaproteobacteria	Enterobacterales	Enterobacteriaceae	Enterobacter	-0.01 (-0.07, 0.04)
ZCEL_adjusted	ASV446	0.0328502	-0.104405	0.170105	0.06994	0.638683	971	19.8764	0	0	0	Bacteria	Actinobacteriota	Coriobacteriia	Coriobacteriales	Eggerthellaceae	Enterorhabdus	0.03 (-0.1, 0.17)
ZCEL_adjusted	ASV16	-0.0469387	-0.244381	0.150503	0.100609	0.640932	971	77.6519	103	9.5	328	Bacteria	Firmicutes	Clostridia	Peptostreptococcales-Tissierellales	Peptostreptococcaceae	Romboutsia	-0.05 (-0.24, 0.15)
ZMGH1_adjusted	ASV936	-0.0360197	-0.188693	0.116653	0.0777966	0.643472	971	47.1679	0	0	13	Bacteria	Firmicutes	Clostridia	Oscillospirales	Ruminococcaceae	Paludicola	-0.04 (-0.19, 0.12)
ZMGH1_adjusted	ASV4217	-0.00910163	-0.0479449	0.0297416	0.0197931	0.645738	971	1.75077	0	0	0	Bacteria	Actinobacteriota	Coriobacteriia	Coriobacteriales	Atopobiaceae	Atopobium	-0.01 (-0.05, 0.03)
ZMGH1_adjusted	ASV89	0.0487227	-0.159278	0.256723	0.105989	0.645841	971	55.2008	22	0	101.5	Bacteria	Firmicutes	Clostridia	Lachnospirales	Lachnospiraceae	CAG-56	0.05 (-0.16, 0.26)
ZCEL_adjusted	ASV589	0.0217713	-0.0716012	0.115144	0.0475792	0.647358	971	4.94336	0	0	0	Bacteria	Firmicutes	Negativicutes	Veillonellales-Selenomonadales	Veillonellaceae	Megasphaera	0.02 (-0.07, 0.12)
ZMGH1_adjusted	ASV813	0.0303659	-0.100151	0.160883	0.0665067	0.648074	971	22.0391	0	0	0	Bacteria	Firmicutes	Clostridia	Oscillospirales	Ruminococcaceae	Fournierella	0.03 (-0.1, 0.16)
ZMGH1_adjusted	ASV246	0.0357797	-0.118367	0.189927	0.0785478	0.648843	971	23.172	0	0	0	Bacteria	Firmicutes	Clostridia	Lachnospirales	Lachnospiraceae	Lachnospiraceae AC2044 group	0.04 (-0.12, 0.19)
ZMGH1_adjusted	ASV253	-0.0250204	-0.133126	0.0830849	0.0550865	0.649787	971	9.57775	0	0	0	Bacteria	Firmicutes	Bacilli	Acholeplasmatales	Acholeplasmataceae	Anaeroplasma	-0.03 (-0.13, 0.08)
ZCEL_adjusted	ASV1268	0.0148754	-0.049529	0.0792798	0.0328181	0.65046	971	4.42842	0	0	0	Bacteria	Synergistota	Synergistia	Synergistales	Synergistaceae	Cloacibacillus	0.01 (-0.05, 0.08)
ZCEL_adjusted	ASV1481	0.0175233	-0.0588204	0.0938671	0.038902	0.65249	971	9.78373	0	0	0	Archaea	Euryarchaeota	Methanobacteria	Methanobacteriales	Methanobacteriaceae	Methanobrevibacter	0.02 (-0.06, 0.09)
ZMGH1_adjusted	ASV2872	0.0107649	-0.0362717	0.0578015	0.0239681	0.653437	971	1.85376	0	0	0	Bacteria	Actinobacteriota	Actinobacteria	Bifidobacteriales	Bifidobacteriaceae	Alloscardovia	0.01 (-0.04, 0.06)
ZMGH1_adjusted	ASV2101	-0.0194155	-0.104265	0.0654345	0.0432364	0.653495	971	8.4449	0	0	0	Bacteria	Firmicutes	Clostridia	Lachnospirales	Lachnospiraceae	Catenibacillus	-0.02 (-0.1, 0.07)
ZCML_adjusted	ASV567	-0.0342181	-0.185778	0.117342	0.0772293	0.657815	971	33.5736	0	0	13	Bacteria	Firmicutes	Clostridia	Lachnospirales	Lachnospiraceae	Shuttleworthia	-0.03 (-0.19, 0.12)
ZCEL_adjusted	ASV621	0.0257934	-0.0886431	0.14023	0.0583126	0.658352	971	13.8002	0	0	0	Bacteria	Firmicutes	Clostridia	Lachnospirales	Lachnospiraceae	Eisenbergiella	0.03 (-0.09, 0.14)
ZMGH1_adjusted	ASV294	-0.0316668	-0.172304	0.108971	0.0716636	0.658676	971	11.5345	0	0	0	Bacteria	Bacteroidota	Bacteroidia	Bacteroidales	Prevotellaceae	Alloprevotella	-0.03 (-0.17, 0.11)
ZMGH1_adjusted	ASV6	0.025125	-0.0883644	0.138614	0.05783	0.664051	971	97.1164	700	329.5	1259	Bacteria	Firmicutes	Clostridia	Lachnospirales	Lachnospiraceae	[Eubacterium] hallii group	0.03 (-0.09, 0.14)
ZCEL_adjusted	ASV1397	-0.0116724	-0.0648456	0.0415008	0.0270951	0.666716	971	1.95675	0	0	0	Bacteria	Firmicutes	Bacilli	Lactobacillales	Lactobacillaceae	Lactiplantibacillus	-0.01 (-0.06, 0.04)
ZMGH1_adjusted	ASV53	0.049635	-0.176628	0.275898	0.115295	0.666927	971	37.5901	0	0	66.5	Bacteria	Firmicutes	Clostridia	Lachnospirales	Lachnospiraceae	[Eubacterium] ruminantium group	0.05 (-0.18, 0.28)
ZCML_adjusted	ASV358	-0.015127	-0.0841778	0.0539238	0.0351858	0.667352	971	4.01648	0	0	0	Bacteria	Proteobacteria	Gammaproteobacteria	Pseudomonadales	Pseudomonadaceae	Pseudomonas	-0.02 (-0.08, 0.05)
ZCML_adjusted	ASV403	0.0193197	-0.0695574	0.108197	0.0452885	0.669773	971	5.87024	0	0	0	Bacteria	Firmicutes	Bacilli	Lactobacillales	Lactobacillaceae	Limosilactobacillus	0.02 (-0.07, 0.11)
ZMGH1_adjusted	ASV768	0.0302519	-0.108982	0.169486	0.0709486	0.669919	971	27.2915	0	0	5	Bacteria	Bacteroidota	Bacteroidia	Bacteroidales	Marinifilaceae	Butyricimonas	0.03 (-0.11, 0.17)
ZMGH1_adjusted	ASV8	0.0248116	-0.0899336	0.139557	0.05847	0.671408	971	96.9104	667	324.5	1285.5	Bacteria	Firmicutes	Clostridia	Oscillospirales	Ruminococcaceae	Subdoligranulum	0.02 (-0.09, 0.14)
ZCEL_adjusted	ASV378	0.0323467	-0.118779	0.183472	0.0770081	0.674549	971	41.0917	0	0	12	Bacteria	Firmicutes	Clostridia	Oscillospirales	Ruminococcaceae	DTU089	0.03 (-0.12, 0.18)
ZCEL_adjusted	ASV181	0.0379756	-0.139635	0.215586	0.090504	0.674872	971	66.8383	31	0	83	Bacteria	Firmicutes	Clostridia	Lachnospirales	Lachnospiraceae	Marvinbryantia	0.04 (-0.14, 0.22)
ZCML_adjusted	ASV23	-0.0302532	-0.174708	0.114202	0.0736091	0.681167	971	93.8208	586	227	1210.5	Bacteria	Firmicutes	Clostridia	Oscillospirales	Ruminococcaceae	Ruminococcus	-0.03 (-0.17, 0.11)
ZCML_adjusted	ASV1128	0.0146965	-0.0564088	0.0858018	0.0362327	0.685117	971	3.29557	0	0	0	Bacteria	Bacteroidota	Bacteroidia	Bacteroidales	Prevotellaceae	Prevotella	0.01 (-0.06, 0.09)
ZCML_adjusted	ASV387	0.0202086	-0.0781132	0.118531	0.0501012	0.686777	971	4.94336	0	0	0	Bacteria	Proteobacteria	Gammaproteobacteria	Enterobacterales	Enterobacteriaceae	Klebsiella	0.02 (-0.08, 0.12)
ZCML_adjusted	ASV1812	-0.0118295	-0.0694184	0.0457593	0.0293452	0.686953	971	3.8105	0	0	0	Bacteria	Firmicutes	Clostridia	Eubacteriales	Eubacteriaceae	Eubacterium	-0.01 (-0.07, 0.05)
ZCEL_adjusted	ASV2874	0.0112612	-0.0438718	0.0663941	0.0280937	0.688626	971	3.8105	0	0	0	Bacteria	Firmicutes	Clostridia	Oscillospirales	Ruminococcaceae	Pygmaiobacter	0.01 (-0.04, 0.07)
ZMGH1_adjusted	ASV1551	0.0201854	-0.0792104	0.119581	0.0506484	0.690323	971	8.95984	0	0	0	Bacteria	Actinobacteriota	Coriobacteriia	Coriobacteriales	Atopobiaceae	Olsenella	0.02 (-0.08, 0.12)
ZCML_adjusted	ASV1139	0.0135732	-0.0533977	0.080544	0.0341259	0.690913	971	4.42842	0	0	0	Bacteria	Firmicutes	Clostridia	Lachnospirales	Lachnospiraceae	Lachnospiraceae UCG-009	0.01 (-0.05, 0.08)
ZMGH1_adjusted	ASV785	0.0183407	-0.0722108	0.108892	0.0461417	0.691099	971	7.51802	0	0	0	Bacteria	Firmicutes	Bacilli	Erysipelotrichales	Erysipelatoclostridiaceae	Coprobacillus	0.02 (-0.07, 0.11)
ZCML_adjusted	ASV26	-0.0308534	-0.18386	0.122153	0.0779665	0.692396	971	90.9372	335	108.5	836	Bacteria	Firmicutes	Clostridia	Oscillospirales	Oscillospiraceae	UCG-002	-0.03 (-0.18, 0.12)
ZMGH1_adjusted	ASV177	-0.0200092	-0.119506	0.0794873	0.0506998	0.693183	971	4.22245	0	0	0	Bacteria	Firmicutes	Negativicutes	Acidaminococcales	Acidaminococcaceae	Succiniclasticum	-0.02 (-0.12, 0.08)
ZCML_adjusted	ASV207	0.0324196	-0.129752	0.194592	0.0826369	0.694915	971	54.9949	9	0	29	Bacteria	Firmicutes	Clostridia	Oscillospirales	Oscillospiraceae	Oscillibacter	0.03 (-0.13, 0.19)
ZCML_adjusted	ASV2651	-0.00892741	-0.0537948	0.03594	0.0228628	0.696271	971	1.75077	0	0	0	Bacteria	Firmicutes	Clostridia	Lachnospirales	Lachnospiraceae	Lactonifactor	-0.01 (-0.05, 0.04)
ZCEL_adjusted	ASV3559	0.00873899	-0.0352474	0.0527254	0.0224139	0.696704	971	3.91349	0	0	0	Bacteria	Firmicutes	Clostridia	Oscillospirales	Ethanoligenenaceae	Acetanaerobacterium	0.01 (-0.04, 0.05)
ZCML_adjusted	ASV39	0.0302439	-0.122469	0.182957	0.0778167	0.697618	971	87.3326	118	39	246.5	Bacteria	Firmicutes	Clostridia	Lachnospirales	Lachnospiraceae	Lachnospiraceae ND3007 group	0.03 (-0.12, 0.18)
ZMGH1_adjusted	ASV208	-0.0316669	-0.192001	0.128667	0.0817005	0.698401	971	21.0093	0	0	0	Bacteria	Firmicutes	Bacilli	Lactobacillales	Lactobacillaceae	Lactobacillus	-0.03 (-0.19, 0.13)
ZMGH1_adjusted	ASV706	-0.0295178	-0.18043	0.121394	0.0768992	0.701175	971	29.9691	0	0	11	Bacteria	Firmicutes	Clostridia	Oscillospirales	Oscillospiraceae	Oscillospira	-0.03 (-0.18, 0.12)
ZMGH1_adjusted	ASV3559	0.00899232	-0.0370952	0.0550798	0.0234845	0.701876	971	3.91349	0	0	0	Bacteria	Firmicutes	Clostridia	Oscillospirales	Ethanoligenenaceae	Acetanaerobacterium	0.01 (-0.04, 0.06)
ZCEL_adjusted	ASV921	-0.0161691	-0.0995838	0.0672456	0.0425051	0.70373	971	6.59114	0	0	0	Bacteria	Firmicutes	Clostridia	Lachnospirales	Lachnospiraceae	Oribacterium	-0.02 (-0.1, 0.07)
ZCML_adjusted	ASV1553	0.0147572	-0.0618572	0.0913715	0.0390399	0.705513	971	6.9001	0	0	0	Bacteria	Actinobacteriota	Coriobacteriia	Coriobacteriales	Eggerthellaceae	Gordonibacter	0.01 (-0.06, 0.09)
ZMGH1_adjusted	ASV2651	0.00889255	-0.0373523	0.0551374	0.0235647	0.705985	971	1.75077	0	0	0	Bacteria	Firmicutes	Clostridia	Lachnospirales	Lachnospiraceae	Lactonifactor	0.01 (-0.04, 0.06)
ZCML_adjusted	ASV2	0.0248502	-0.104443	0.154144	0.0658832	0.70612	971	95.8805	862	388	1685	Bacteria	Firmicutes	Clostridia	Lachnospirales	Lachnospiraceae	Agathobacter	0.02 (-0.1, 0.15)
ZMGH1_adjusted	ASV83	0.0281452	-0.122175	0.178465	0.0765975	0.713371	971	87.5386	81	32	171.5	Bacteria	Firmicutes	Clostridia	Oscillospirales	Butyricicoccaceae	Butyricicoccus	0.03 (-0.12, 0.18)
ZCML_adjusted	ASV401	0.0290466	-0.129693	0.187786	0.0808879	0.719602	971	34.8095	0	0	10	Bacteria	Proteobacteria	Gammaproteobacteria	Burkholderiales	Sutterellaceae	Parasutterella	0.03 (-0.13, 0.19)
ZMGH1_adjusted	ASV1991	0.0133777	-0.0601037	0.0868591	0.0374434	0.720963	971	9.78373	0	0	0	Bacteria	Firmicutes	Clostridia	Oscillospirales	Ruminococcaceae	Anaerofilum	0.01 (-0.06, 0.09)
ZCML_adjusted	ASV1929	-0.0124731	-0.0813038	0.0563576	0.0350736	0.722199	971	4.84037	0	0	0	Bacteria	Firmicutes	Clostridia	Lachnospirales	Lachnospiraceae	Lachnospiraceae NK4B4 group	-0.01 (-0.08, 0.06)
ZCML_adjusted	ASV1015	0.0161344	-0.0729124	0.105181	0.045375	0.722234	971	9.68074	0	0	0	Bacteria	Firmicutes	Clostridia	Peptostreptococcales-Tissierellales	Anaerovoracaceae	Mogibacterium	0.02 (-0.07, 0.11)
ZCEL_adjusted	ASV251	0.0284277	-0.130727	0.187582	0.0810994	0.726019	971	60.9681	9	0	32.5	Bacteria	Bacteroidota	Bacteroidia	Bacteroidales	Marinifilaceae	Odoribacter	0.03 (-0.13, 0.19)
ZCML_adjusted	ASV113	0.0325516	-0.149699	0.214802	0.0928684	0.726031	971	64.4696	27	0	91	Bacteria	Firmicutes	Clostridia	Lachnospirales	Lachnospiraceae	[Eubacterium] xylanophilum group	0.03 (-0.15, 0.21)
ZCEL_adjusted	ASV358	-0.0121279	-0.080056	0.0558002	0.0346137	0.726132	971	4.01648	0	0	0	Bacteria	Proteobacteria	Gammaproteobacteria	Pseudomonadales	Pseudomonadaceae	Pseudomonas	-0.01 (-0.08, 0.06)
ZMGH1_adjusted	ASV283	0.0295406	-0.136038	0.195119	0.0843729	0.726327	971	28.6303	0	0	14	Bacteria	Actinobacteriota	Coriobacteriia	Coriobacteriales	Eggerthellaceae	Senegalimassilia	0.03 (-0.14, 0.2)
ZMGH1_adjusted	ASV264	0.0224852	-0.103595	0.148566	0.064246	0.726427	971	7.20906	0	0	0	Bacteria	Bacteroidota	Bacteroidia	Bacteroidales	Prevotellaceae	Prevotellaceae NK3B31 group	0.02 (-0.1, 0.15)
ZCML_adjusted	ASV1568	-0.018316	-0.122275	0.0856434	0.0529739	0.729603	971	19.2585	0	0	0	Bacteria	Firmicutes	Clostridia	Oscillospirales	Ruminococcaceae	Anaerotruncus	-0.02 (-0.12, 0.09)
ZCML_adjusted	ASV898	0.0151969	-0.0716153	0.102009	0.0442363	0.731269	971	6.9001	0	0	0	Bacteria	Firmicutes	Bacilli	Erysipelotrichales	Erysipelotrichaceae	Catenisphaera	0.02 (-0.07, 0.1)
ZCML_adjusted	ASV1551	-0.0168533	-0.113291	0.0795845	0.0491412	0.731707	971	8.95984	0	0	0	Bacteria	Actinobacteriota	Coriobacteriia	Coriobacteriales	Atopobiaceae	Olsenella	-0.02 (-0.11, 0.08)
ZMGH1_adjusted	ASV40	-0.0186455	-0.126438	0.0891466	0.0549269	0.734338	971	96.9104	364	177.5	665	Bacteria	Firmicutes	Clostridia	Lachnospirales	Lachnospiraceae	Roseburia	-0.02 (-0.13, 0.09)
ZMGH1_adjusted	ASV251	-0.02884	-0.195597	0.137917	0.0849733	0.734383	971	60.9681	9	0	32.5	Bacteria	Bacteroidota	Bacteroidia	Bacteroidales	Marinifilaceae	Odoribacter	-0.03 (-0.2, 0.14)
ZMGH1_adjusted	ASV1812	-0.0102135	-0.0695716	0.0491445	0.0302467	0.735683	971	3.8105	0	0	0	Bacteria	Firmicutes	Clostridia	Eubacteriales	Eubacteriaceae	Eubacterium	-0.01 (-0.07, 0.05)
ZCEL_adjusted	ASV2152	0.00964676	-0.0464568	0.0657503	0.0285883	0.735862	971	5.66426	0	0	0	Bacteria	Verrucomicrobiota	Lentisphaeria	Victivallales	Victivallaceae	Victivallis	0.01 (-0.05, 0.07)
ZCEL_adjusted	ASV414	-0.0154559	-0.105454	0.0745423	0.0458598	0.736172	971	8.85685	0	0	0	Bacteria	Firmicutes	Bacilli	Lactobacillales	Lactobacillaceae	Latilactobacillus	-0.02 (-0.11, 0.07)
ZCML_adjusted	ASV42	-0.0351325	-0.242606	0.172341	0.105721	0.739726	971	71.7817	56	0	289	Bacteria	Firmicutes	Clostridia	Clostridiales	Clostridiaceae	Clostridium sensu stricto 1	-0.04 (-0.24, 0.17)
ZCML_adjusted	ASV253	0.017272	-0.0876195	0.122164	0.0534489	0.746652	971	9.57775	0	0	0	Bacteria	Firmicutes	Bacilli	Acholeplasmatales	Acholeplasmataceae	Anaeroplasma	0.02 (-0.09, 0.12)
ZMGH1_adjusted	ASV358	-0.0116954	-0.0828687	0.0594779	0.0362673	0.747162	971	4.01648	0	0	0	Bacteria	Proteobacteria	Gammaproteobacteria	Pseudomonadales	Pseudomonadaceae	Pseudomonas	-0.01 (-0.08, 0.06)
ZCEL_adjusted	ASV32	0.0315198	-0.160714	0.223754	0.0979553	0.747692	971	80.0206	74	11	321	Bacteria	Firmicutes	Bacilli	Lactobacillales	Streptococcaceae	Streptococcus	0.03 (-0.16, 0.22)
ZMGH1_adjusted	ASV135	-0.0274601	-0.195285	0.140365	0.0855175	0.748202	971	76.828	42	8	93	Bacteria	Firmicutes	Clostridia	Lachnospirales	Lachnospiraceae	Lachnospiraceae FCS020 group	-0.03 (-0.2, 0.14)
ZCEL_adjusted	ASV238	-0.028818	-0.205147	0.147511	0.089851	0.748485	971	47.6828	0	0	36	Bacteria	Firmicutes	Clostridia	Lachnospirales	Lachnospiraceae	Lachnospiraceae UCG-004	-0.03 (-0.21, 0.15)
ZCML_adjusted	ASV7	-0.0210377	-0.150398	0.108323	0.0659173	0.749681	971	94.8507	436	196	851.5	Bacteria	Firmicutes	Clostridia	Lachnospirales	Lachnospiraceae	Fusicatenibacter	-0.02 (-0.15, 0.11)
ZMGH1_adjusted	ASV67	0.0204553	-0.105463	0.146373	0.0641631	0.749947	971	92.482	76	29	143.5	Bacteria	Firmicutes	Clostridia	Monoglobales	Monoglobaceae	Monoglobus	0.02 (-0.11, 0.15)
ZMGH1_adjusted	ASV712	0.019521	-0.101528	0.14057	0.0616824	0.75171	971	21.4212	0	0	0	Bacteria	Firmicutes	Clostridia	Peptostreptococcales-Tissierellales	Anaerovoracaceae	[Eubacterium] brachy group	0.02 (-0.1, 0.14)
ZCEL_adjusted	ASV5	-0.016645	-0.12114	0.0878502	0.0532469	0.754653	971	97.9403	1226	512.5	2543.5	Bacteria	Firmicutes	Clostridia	Oscillospirales	Ruminococcaceae	Faecalibacterium	-0.02 (-0.12, 0.09)
ZCEL_adjusted	ASV3648	0.00701899	-0.0371264	0.0511644	0.0224949	0.755089	971	2.88363	0	0	0	Bacteria	Firmicutes	Clostridia	Lachnospirales	Lachnospiraceae	GCA-900066755	0.01 (-0.04, 0.05)
ZCML_adjusted	ASV89	0.032003	-0.169815	0.233821	0.102839	0.755721	971	55.2008	22	0	101.5	Bacteria	Firmicutes	Clostridia	Lachnospirales	Lachnospiraceae	CAG-56	0.03 (-0.17, 0.23)
ZCEL_adjusted	ASV490	0.0170603	-0.0906801	0.124801	0.0549006	0.756059	971	11.5345	0	0	0	Bacteria	Firmicutes	Clostridia	Lachnospirales	Lachnospiraceae	UC5-1-2E3	0.02 (-0.09, 0.12)
ZCML_adjusted	ASV481	-0.0149456	-0.110014	0.0801224	0.0484432	0.757756	971	6.48816	0	0	0	Bacteria	Firmicutes	Bacilli	Erysipelotrichales	Erysipelotrichaceae	Solobacterium	-0.01 (-0.11, 0.08)
ZMGH1_adjusted	ASV151	-0.0261507	-0.195158	0.142856	0.0861197	0.761457	971	64.1607	12	0	29	Bacteria	Firmicutes	Clostridia	Oscillospirales	Ruminococcaceae	UBA1819	-0.03 (-0.2, 0.14)
ZMGH1_adjusted	ASV1568	-0.016551	-0.123703	0.090601	0.0546007	0.761858	971	19.2585	0	0	0	Bacteria	Firmicutes	Clostridia	Oscillospirales	Ruminococcaceae	Anaerotruncus	-0.02 (-0.12, 0.09)
ZCEL_adjusted	ASV23	0.0219037	-0.120204	0.164011	0.0724129	0.76235	971	93.8208	586	227	1210.5	Bacteria	Firmicutes	Clostridia	Oscillospirales	Ruminococcaceae	Ruminococcus	0.02 (-0.12, 0.16)
ZMGH1_adjusted	ASV113	-0.0289173	-0.216765	0.158931	0.0957205	0.762641	971	64.4696	27	0	91	Bacteria	Firmicutes	Clostridia	Lachnospirales	Lachnospiraceae	[Eubacterium] xylanophilum group	-0.03 (-0.22, 0.16)
ZCML_adjusted	ASV1844	0.00705012	-0.0388324	0.0529326	0.0233801	0.763065	971	1.23584	0	0	0	Bacteria	Firmicutes	Bacilli	Lactobacillales	Lactobacillaceae	Weissella	0.01 (-0.04, 0.05)
ZCEL_adjusted	ASV330	-0.0187555	-0.141089	0.103578	0.0623369	0.763577	971	11.0196	0	0	0	Bacteria	Bacteroidota	Bacteroidia	Bacteroidales	Prevotellaceae	Prevotella_7	-0.02 (-0.14, 0.1)
ZCML_adjusted	ASV414	-0.0140049	-0.105495	0.0774849	0.0466199	0.763933	971	8.85685	0	0	0	Bacteria	Firmicutes	Bacilli	Lactobacillales	Lactobacillaceae	Latilactobacillus	-0.01 (-0.11, 0.08)
ZMGH1_adjusted	ASV77	-0.0153705	-0.115945	0.0852036	0.0512489	0.764305	971	95.8805	80	36	156.5	Bacteria	Firmicutes	Clostridia	Oscillospirales	Ruminococcaceae	Incertae Sedis	-0.02 (-0.12, 0.09)
ZCML_adjusted	ASV589	-0.0144337	-0.109359	0.0804912	0.0483703	0.765463	971	4.94336	0	0	0	Bacteria	Firmicutes	Negativicutes	Veillonellales-Selenomonadales	Veillonellaceae	Megasphaera	-0.01 (-0.11, 0.08)
ZCEL_adjusted	ASV53	-0.0327531	-0.248712	0.183206	0.110045	0.766047	971	37.5901	0	0	66.5	Bacteria	Firmicutes	Clostridia	Lachnospirales	Lachnospiraceae	[Eubacterium] ruminantium group	-0.03 (-0.25, 0.18)
ZCML_adjusted	ASV1062	0.0198425	-0.111593	0.151278	0.0669748	0.76709	971	40.7827	0	0	8	Bacteria	Firmicutes	Clostridia	Lachnospirales	Defluviitaleaceae	Defluviitaleaceae UCG-011	0.02 (-0.11, 0.15)
ZCML_adjusted	ASV303	0.0261389	-0.147101	0.199379	0.0882767	0.767217	971	30.0721	0	0	18	Bacteria	Desulfobacterota	Desulfovibrionia	Desulfovibrionales	Desulfovibrionaceae	Desulfovibrio	0.03 (-0.15, 0.2)
ZCEL_adjusted	ASV1368	0.0144296	-0.0814909	0.11035	0.0488776	0.767891	971	19.3615	0	0	0	Bacteria	Firmicutes	Clostridia	Oscillospirales	Ruminococcaceae	Candidatus Soleaferrea	0.01 (-0.08, 0.11)
ZMGH1_adjusted	ASV159	0.0273259	-0.156235	0.210887	0.0935362	0.770241	971	30.793	0	0	22	Bacteria	Actinobacteriota	Coriobacteriia	Coriobacteriales	Coriobacteriaceae	Collinsella	0.03 (-0.16, 0.21)
ZMGH1_adjusted	ASV621	-0.017547	-0.137457	0.102363	0.0611015	0.774039	971	13.8002	0	0	0	Bacteria	Firmicutes	Clostridia	Lachnospirales	Lachnospiraceae	Eisenbergiella	-0.02 (-0.14, 0.1)
ZMGH1_adjusted	ASV554	-0.0139466	-0.109974	0.0820802	0.0489318	0.775689	971	5.14933	0	0	0	Bacteria	Firmicutes	Clostridia	Lachnospirales	Lachnospiraceae	[Bacteroides] pectinophilus group	-0.01 (-0.11, 0.08)
ZMGH1_adjusted	ASV13	0.0162198	-0.0961513	0.128591	0.0572602	0.777035	971	97.6313	474	207.5	941	Bacteria	Firmicutes	Clostridia	Lachnospirales	Lachnospiraceae	Anaerostipes	0.02 (-0.1, 0.13)
ZCEL_adjusted	ASV1176	0.00988716	-0.059091	0.0788653	0.0351487	0.778546	971	5.25232	0	0	0	Bacteria	Firmicutes	Clostridia	Peptostreptococcales-Tissierellales	Anaerovoracaceae	[Eubacterium] nodatum group	0.01 (-0.06, 0.08)
ZCML_adjusted	ASV94	0.0210061	-0.128003	0.170015	0.0759297	0.782107	971	86.6117	72	22	156	Bacteria	Firmicutes	Clostridia	Lachnospirales	Lachnospiraceae	[Eubacterium] ventriosum group	0.02 (-0.13, 0.17)
ZMGH1_adjusted	ASV98	0.0256285	-0.160163	0.21142	0.0946727	0.786676	971	21.3182	0	0	0	Bacteria	Firmicutes	Clostridia	Lachnospirales	Lachnospiraceae	[Ruminococcus] gnavus group	0.03 (-0.16, 0.21)
ZMGH1_adjusted	ASV2119	0.0104244	-0.0654719	0.0863207	0.038674	0.787569	971	9.47477	0	0	0	Bacteria	Firmicutes	Clostridia	Christensenellales	Christensenellaceae	Christensenella	0.01 (-0.07, 0.09)
ZCEL_adjusted	ASV6	0.0147704	-0.0935521	0.123093	0.0551972	0.789071	971	97.1164	700	329.5	1259	Bacteria	Firmicutes	Clostridia	Lachnospirales	Lachnospiraceae	[Eubacterium] hallii group	0.01 (-0.09, 0.12)
ZCML_adjusted	ASV41	0.0271959	-0.173466	0.227858	0.10225	0.790317	971	74.8713	99	0	232	Bacteria	Firmicutes	Clostridia	Lachnospirales	Lachnospiraceae	[Ruminococcus] gauvreauii group	0.03 (-0.17, 0.23)
ZMGH1_adjusted	ASV207	0.0226117	-0.144545	0.189769	0.0851772	0.790708	971	54.9949	9	0	29	Bacteria	Firmicutes	Clostridia	Oscillospirales	Oscillospiraceae	Oscillibacter	0.02 (-0.14, 0.19)
ZCML_adjusted	ASV936	-0.0198039	-0.167942	0.128334	0.0754856	0.793106	971	47.1679	0	0	13	Bacteria	Firmicutes	Clostridia	Oscillospirales	Ruminococcaceae	Paludicola	-0.02 (-0.17, 0.13)
ZCML_adjusted	ASV10	-0.0140868	-0.119727	0.0915537	0.0538305	0.793619	971	96.8074	433	218	795	Bacteria	Firmicutes	Clostridia	Lachnospirales	Lachnospiraceae	Dorea	-0.01 (-0.12, 0.09)
ZCML_adjusted	ASV1176	-0.00934469	-0.0794656	0.0607762	0.035731	0.793742	971	5.25232	0	0	0	Bacteria	Firmicutes	Clostridia	Peptostreptococcales-Tissierellales	Anaerovoracaceae	[Eubacterium] nodatum group	-0.01 (-0.08, 0.06)
ZMGH1_adjusted	ASV16	-0.0275272	-0.234416	0.179362	0.105423	0.794063	971	77.6519	103	9.5	328	Bacteria	Firmicutes	Clostridia	Peptostreptococcales-Tissierellales	Peptostreptococcaceae	Romboutsia	-0.03 (-0.23, 0.18)
ZCML_adjusted	ASV13	-0.0143182	-0.123344	0.0947073	0.0555554	0.796673	971	97.6313	474	207.5	941	Bacteria	Firmicutes	Clostridia	Lachnospirales	Lachnospiraceae	Anaerostipes	-0.01 (-0.12, 0.09)
ZMGH1_adjusted	ASV3	-0.0320183	-0.290774	0.226738	0.131853	0.808186	971	67.6622	65	0	601.5	Bacteria	Proteobacteria	Gammaproteobacteria	Enterobacterales	Enterobacteriaceae	Escherichia-Shigella	-0.03 (-0.29, 0.23)
ZCML_adjusted	ASV1099	-0.00799719	-0.0731578	0.0571635	0.0332035	0.80972	971	3.60453	0	0	0	Bacteria	Firmicutes	Clostridia	Lachnospirales	Lachnospiraceae	Epulopiscium	-0.01 (-0.07, 0.06)
ZCEL_adjusted	ASV1991	0.00858037	-0.0615538	0.0787146	0.0357378	0.810311	971	9.78373	0	0	0	Bacteria	Firmicutes	Clostridia	Oscillospirales	Ruminococcaceae	Anaerofilum	0.01 (-0.06, 0.08)
ZCML_adjusted	ASV1397	0.00652368	-0.0475338	0.0605812	0.0275457	0.812839	971	1.95675	0	0	0	Bacteria	Firmicutes	Bacilli	Lactobacillales	Lactobacillaceae	Lactiplantibacillus	0.01 (-0.05, 0.06)
ZCML_adjusted	ASV429	0.0145363	-0.106181	0.135254	0.0615131	0.813242	971	16.8898	0	0	0	Bacteria	Proteobacteria	Gammaproteobacteria	Enterobacterales	Pasteurellaceae	Haemophilus	0.01 (-0.11, 0.14)
ZMGH1_adjusted	ASV33	0.0281146	-0.206736	0.262966	0.119671	0.814313	971	49.4336	0	0	137.5	Bacteria	Firmicutes	Clostridia	Peptostreptococcales-Tissierellales	Peptostreptococcaceae	Intestinibacter	0.03 (-0.21, 0.26)
ZCML_adjusted	ASV490	0.0129702	-0.0965569	0.122497	0.055811	0.816281	971	11.5345	0	0	0	Bacteria	Firmicutes	Clostridia	Lachnospirales	Lachnospiraceae	UC5-1-2E3	0.01 (-0.1, 0.12)
ZCEL_adjusted	ASV207	0.018859	-0.14068	0.178397	0.081295	0.816602	971	54.9949	9	0	29	Bacteria	Firmicutes	Clostridia	Oscillospirales	Oscillospiraceae	Oscillibacter	0.02 (-0.14, 0.18)
ZCEL_adjusted	ASV242	0.0203357	-0.15244	0.193112	0.0880403	0.817379	971	40.9887	0	0	21	Bacteria	Firmicutes	Clostridia	Lachnospirales	Lachnospiraceae	Lachnospiraceae UCG-010	0.02 (-0.15, 0.19)
ZCEL_adjusted	ASV1784	0.0114149	-0.0888218	0.111651	0.0510769	0.823207	971	17.9197	0	0	0	Bacteria	Proteobacteria	Gammaproteobacteria	Burkholderiales	Oxalobacteraceae	Oxalobacter	0.01 (-0.09, 0.11)
ZCML_adjusted	ASV1044	0.00703467	-0.0555932	0.0696626	0.0319129	0.825581	971	1.95675	0	0	0	Bacteria	Firmicutes	Clostridia	Lachnospirales	Lachnospiraceae	Anaerosporobacter	0.01 (-0.06, 0.07)
ZMGH1_adjusted	ASV238	-0.0205086	-0.205265	0.164248	0.0941454	0.827601	971	47.6828	0	0	36	Bacteria	Firmicutes	Clostridia	Lachnospirales	Lachnospiraceae	Lachnospiraceae UCG-004	-0.02 (-0.21, 0.16)
ZMGH1_adjusted	ASV93	-0.015828	-0.162269	0.130613	0.0746208	0.832064	971	91.2461	142	48.5	313.5	Bacteria	Firmicutes	Clostridia	Lachnospirales	Lachnospiraceae	Lachnoclostridium	-0.02 (-0.16, 0.13)
ZMGH1_adjusted	ASV369	-0.0182914	-0.191395	0.154813	0.0882075	0.835767	971	42.3275	0	0	22	Bacteria	Firmicutes	Clostridia	Oscillospirales	Ruminococcaceae	Negativibacillus	-0.02 (-0.19, 0.15)
ZCML_adjusted	ASV2005	-0.00432189	-0.0470376	0.0383938	0.0217663	0.842651	971	1.23584	0	0	0	Bacteria	Proteobacteria	Gammaproteobacteria	Enterobacterales	Succinivibrionaceae	Succinivibrio	0 (-0.05, 0.04)
ZMGH1_adjusted	ASV19	0.0223849	-0.200627	0.245397	0.113639	0.843883	971	77.9609	193	18	596	Bacteria	Actinobacteriota	Actinobacteria	Bifidobacteriales	Bifidobacteriaceae	Bifidobacterium	0.02 (-0.2, 0.25)
ZCML_adjusted	ASV355	0.0168485	-0.153338	0.187035	0.0867211	0.845995	971	37.0752	0	0	19	Bacteria	Proteobacteria	Gammaproteobacteria	Burkholderiales	Sutterellaceae	Sutterella	0.02 (-0.15, 0.19)
ZCML_adjusted	ASV71	0.0168108	-0.153228	0.18685	0.0866457	0.846204	971	81.1535	62	10	183	Bacteria	Bacteroidota	Bacteroidia	Bacteroidales	Tannerellaceae	Parabacteroides	0.02 (-0.15, 0.19)
ZCEL_adjusted	ASV2061	-0.00766287	-0.08581	0.0704843	0.0398209	0.847444	971	9.68074	0	0	0	Bacteria	Firmicutes	Clostridia	Oscillospirales	Ruminococcaceae	Caproiciproducens	-0.01 (-0.09, 0.07)
ZMGH1_adjusted	ASV640	0.00693169	-0.0639669	0.0778302	0.0361273	0.847886	971	2.78064	0	0	0	Bacteria	Firmicutes	Clostridia	Lachnospirales	Lachnospiraceae	Lachnospiraceae UCG-007	0.01 (-0.06, 0.08)
ZCML_adjusted	ASV1991	-0.00692207	-0.0782186	0.0643744	0.0363301	0.848932	971	9.78373	0	0	0	Bacteria	Firmicutes	Clostridia	Oscillospirales	Ruminococcaceae	Anaerofilum	-0.01 (-0.08, 0.06)
ZMGH1_adjusted	ASV27	0.010364	-0.0971526	0.117881	0.0547865	0.849999	971	97.3223	302	141	660	Bacteria	Firmicutes	Clostridia	Lachnospirales	Lachnospiraceae	[Ruminococcus] torques group	0.01 (-0.1, 0.12)
ZCML_adjusted	ASV4217	-0.00356606	-0.0412561	0.034124	0.0192055	0.852736	971	1.75077	0	0	0	Bacteria	Actinobacteriota	Coriobacteriia	Coriobacteriales	Atopobiaceae	Atopobium	0 (-0.04, 0.03)
ZCEL_adjusted	ASV40	0.00965865	-0.093224	0.112541	0.0524252	0.853867	971	96.9104	364	177.5	665	Bacteria	Firmicutes	Clostridia	Lachnospirales	Lachnospiraceae	Roseburia	0.01 (-0.09, 0.11)
ZCEL_adjusted	ASV1749	0.00491245	-0.0478236	0.0576485	0.0268724	0.854989	971	3.0896	0	0	0	Bacteria	Actinobacteriota	Coriobacteriia	Coriobacteriales	Atopobiaceae	Coriobacteriaceae UCG-002	0 (-0.05, 0.06)
ZMGH1_adjusted	ASV1044	0.00598958	-0.0585612	0.0705404	0.0328927	0.855548	971	1.95675	0	0	0	Bacteria	Firmicutes	Clostridia	Lachnospirales	Lachnospiraceae	Anaerosporobacter	0.01 (-0.06, 0.07)
ZCEL_adjusted	ASV273	-0.0146185	-0.173805	0.144569	0.0811159	0.857021	971	66.4264	16	0	40.5	Bacteria	Firmicutes	Clostridia	Peptostreptococcales-Tissierellales	Anaerovoracaceae	Family XIII UCG-001	-0.01 (-0.17, 0.14)
ZCML_adjusted	ASV20	0.00929774	-0.0929152	0.111511	0.052084	0.858357	971	98.9701	1189	406	2539.5	Bacteria	Bacteroidota	Bacteroidia	Bacteroidales	Bacteroidaceae	Bacteroides	0.01 (-0.09, 0.11)
ZCML_adjusted	ASV83	0.0131844	-0.132667	0.159036	0.0743204	0.859232	971	87.5386	81	32	171.5	Bacteria	Firmicutes	Clostridia	Oscillospirales	Butyricicoccaceae	Butyricicoccus	0.01 (-0.13, 0.16)
ZMGH1_adjusted	ASV2874	0.00516659	-0.0526037	0.0629368	0.0294376	0.860717	971	3.8105	0	0	0	Bacteria	Firmicutes	Clostridia	Oscillospirales	Ruminococcaceae	Pygmaiobacter	0.01 (-0.05, 0.06)
ZCEL_adjusted	ASV253	0.00914787	-0.0940389	0.112335	0.0525802	0.861919	971	9.57775	0	0	0	Bacteria	Firmicutes	Bacilli	Acholeplasmatales	Acholeplasmataceae	Anaeroplasma	0.01 (-0.09, 0.11)
ZMGH1_adjusted	ASV47	0.0168977	-0.174174	0.20797	0.0973634	0.862253	971	18.3316	0	0	0	Bacteria	Firmicutes	Clostridia	Lachnospirales	Lachnospiraceae	Butyrivibrio	0.02 (-0.17, 0.21)
ZCML_adjusted	ASV196	0.0112802	-0.119225	0.141785	0.0665005	0.86534	971	9.68074	0	0	0	Bacteria	Firmicutes	Bacilli	Lactobacillales	Lactobacillaceae	Ligilactobacillus	0.01 (-0.12, 0.14)
ZCML_adjusted	ASV6	-0.00948557	-0.119604	0.100633	0.0561126	0.865797	971	97.1164	700	329.5	1259	Bacteria	Firmicutes	Clostridia	Lachnospirales	Lachnospiraceae	[Eubacterium] hallii group	-0.01 (-0.12, 0.1)
ZCEL_adjusted	ASV860	-0.00773477	-0.0987465	0.0832769	0.0463762	0.867576	971	6.1792	0	0	0	Bacteria	Firmicutes	Negativicutes	Veillonellales-Selenomonadales	Selenomonadaceae	Mitsuokella	-0.01 (-0.1, 0.08)
ZMGH1_adjusted	ASV1176	0.00610423	-0.0661705	0.078379	0.0368286	0.868391	971	5.25232	0	0	0	Bacteria	Firmicutes	Clostridia	Peptostreptococcales-Tissierellales	Anaerovoracaceae	[Eubacterium] nodatum group	0.01 (-0.07, 0.08)
ZCML_adjusted	ASV1513	0.00591231	-0.0642521	0.0760767	0.0357532	0.868692	971	4.11946	0	0	0	Bacteria	Firmicutes	Bacilli	Erysipelotrichales	Erysipelotrichaceae	Faecalitalea	0.01 (-0.06, 0.08)
ZCEL_adjusted	ASV135	-0.0125048	-0.172686	0.147676	0.0816225	0.878271	971	76.828	42	8	93	Bacteria	Firmicutes	Clostridia	Lachnospirales	Lachnospiraceae	Lachnospiraceae FCS020 group	-0.01 (-0.17, 0.15)
ZCEL_adjusted	ASV27	0.00796795	-0.094648	0.110584	0.0522894	0.878918	971	97.3223	302	141	660	Bacteria	Firmicutes	Clostridia	Lachnospirales	Lachnospiraceae	[Ruminococcus] torques group	0.01 (-0.09, 0.11)
ZCML_adjusted	ASV242	-0.0135303	-0.18917	0.16211	0.0894997	0.879868	971	40.9887	0	0	21	Bacteria	Firmicutes	Clostridia	Lachnospirales	Lachnospiraceae	Lachnospiraceae UCG-010	-0.01 (-0.19, 0.16)
ZCEL_adjusted	ASV2651	0.00328945	-0.0408501	0.047429	0.0224919	0.883755	971	1.75077	0	0	0	Bacteria	Firmicutes	Clostridia	Lachnospirales	Lachnospiraceae	Lactonifactor	0 (-0.04, 0.05)
ZCML_adjusted	ASV19	0.0159881	-0.200384	0.232361	0.110255	0.884734	971	77.9609	193	18	596	Bacteria	Actinobacteriota	Actinobacteria	Bifidobacteriales	Bifidobacteriaceae	Bifidobacterium	0.02 (-0.2, 0.23)
ZCEL_adjusted	ASV44	-0.0164486	-0.24324	0.210343	0.115565	0.886848	971	33.4706	0	0	86	Bacteria	Firmicutes	Negativicutes	Veillonellales-Selenomonadales	Veillonellaceae	Dialister	-0.02 (-0.24, 0.21)
ZCML_adjusted	ASV726	-0.00826804	-0.122611	0.106075	0.0582652	0.887186	971	23.275	0	0	0	Bacteria	Bacteroidota	Bacteroidia	Bacteroidales	Barnesiellaceae	Coprobacter	-0.01 (-0.12, 0.11)
ZCEL_adjusted	ASV785	-0.00621694	-0.0926468	0.080213	0.0440415	0.887773	971	7.51802	0	0	0	Bacteria	Firmicutes	Bacilli	Erysipelotrichales	Erysipelatoclostridiaceae	Coprobacillus	-0.01 (-0.09, 0.08)
ZCML_adjusted	ASV58	-0.0139371	-0.208476	0.180602	0.0991299	0.888221	971	72.6056	50	0	169	Bacteria	Firmicutes	Bacilli	Erysipelotrichales	Erysipelatoclostridiaceae	Erysipelotrichaceae UCG-003	-0.01 (-0.21, 0.18)
ZCEL_adjusted	ASV355	0.0114851	-0.155931	0.178901	0.0853092	0.892934	971	37.0752	0	0	19	Bacteria	Proteobacteria	Gammaproteobacteria	Burkholderiales	Sutterellaceae	Sutterella	0.01 (-0.16, 0.18)
ZCML_adjusted	ASV30	0.0163004	-0.224417	0.257018	0.122661	0.894308	971	32.5438	0	0	100.5	Bacteria	Firmicutes	Clostridia	Oscillospirales	Ruminococcaceae	CAG-352	0.02 (-0.22, 0.26)
ZCML_adjusted	ASV201	0.0119378	-0.164993	0.188868	0.0901573	0.894687	971	41.4006	0	0	35	Bacteria	Firmicutes	Clostridia	Lachnospirales	Lachnospiraceae	Lachnospiraceae UCG-001	0.01 (-0.16, 0.19)
ZCEL_adjusted	ASV2211	-0.005318	-0.0843402	0.0737041	0.0402668	0.894958	971	8.03296	0	0	0	Bacteria	Firmicutes	Negativicutes	Veillonellales-Selenomonadales	Veillonellaceae	Allisonella	-0.01 (-0.08, 0.07)
ZCML_adjusted	ASV434	0.00920355	-0.131049	0.149456	0.0714674	0.897559	971	24.0989	0	0	0	Bacteria	Firmicutes	Clostridia	Oscillospirales	Oscillospiraceae	Flavonifractor	0.01 (-0.13, 0.15)
ZMGH1_adjusted	ASV414	0.0057906	-0.0885112	0.100092	0.0480527	0.904108	971	8.85685	0	0	0	Bacteria	Firmicutes	Bacilli	Lactobacillales	Lactobacillaceae	Latilactobacillus	0.01 (-0.09, 0.1)
ZCML_adjusted	ASV246	-0.00880406	-0.158376	0.140768	0.0762164	0.908062	971	23.172	0	0	0	Bacteria	Firmicutes	Clostridia	Lachnospirales	Lachnospiraceae	Lachnospiraceae AC2044 group	-0.01 (-0.16, 0.14)
ZCML_adjusted	ASV273	0.00943669	-0.152388	0.171262	0.0824601	0.908914	971	66.4264	16	0	40.5	Bacteria	Firmicutes	Clostridia	Peptostreptococcales-Tissierellales	Anaerovoracaceae	Family XIII UCG-001	0.01 (-0.15, 0.17)
ZMGH1_adjusted	ASV3567	-0.00260227	-0.0491196	0.0439151	0.0237035	0.912604	971	2.16272	0	0	0	Bacteria	Firmicutes	Bacilli	Erysipelotrichales	Erysipelotrichaceae	Faecalicoccus	0 (-0.05, 0.04)
ZCEL_adjusted	ASV2101	-0.004323	-0.0853131	0.0766671	0.0412696	0.916596	971	8.4449	0	0	0	Bacteria	Firmicutes	Clostridia	Lachnospirales	Lachnospiraceae	Catenibacillus	0 (-0.09, 0.08)
ZCML_adjusted	ASV3701	0.00226521	-0.0403674	0.0448978	0.021724	0.916975	971	2.16272	0	0	0	Bacteria	Bacteroidota	Bacteroidia	Bacteroidales	Marinifilaceae	Sanguibacteroides	0 (-0.04, 0.04)
ZCEL_adjusted	ASV3701	0.00222222	-0.0397158	0.0441603	0.0213701	0.917201	971	2.16272	0	0	0	Bacteria	Bacteroidota	Bacteroidia	Bacteroidales	Marinifilaceae	Sanguibacteroides	0 (-0.04, 0.04)
ZCML_adjusted	ASV65	-0.00980306	-0.197352	0.177746	0.0955682	0.918321	971	78.0639	83	13	261.5	Bacteria	Firmicutes	Clostridia	Lachnospirales	Lachnospiraceae	[Eubacterium] eligens group	-0.01 (-0.2, 0.18)
ZCEL_adjusted	ASV8	-0.00567465	-0.115199	0.10385	0.0558095	0.919033	971	96.9104	667	324.5	1285.5	Bacteria	Firmicutes	Clostridia	Oscillospirales	Ruminococcaceae	Subdoligranulum	-0.01 (-0.12, 0.1)
ZCML_adjusted	ASV3115	0.00250008	-0.0459002	0.0509003	0.024663	0.919279	971	3.0896	0	0	0	Bacteria	Firmicutes	Bacilli	Lactobacillales	Lactobacillaceae	Leuconostoc	0 (-0.05, 0.05)
ZMGH1_adjusted	ASV490	0.00579024	-0.107101	0.118682	0.0575254	0.919845	971	11.5345	0	0	0	Bacteria	Firmicutes	Clostridia	Lachnospirales	Lachnospiraceae	UC5-1-2E3	0.01 (-0.11, 0.12)
ZCML_adjusted	ASV785	0.00445059	-0.0834111	0.0923123	0.0447711	0.920836	971	7.51802	0	0	0	Bacteria	Firmicutes	Bacilli	Erysipelotrichales	Erysipelatoclostridiaceae	Coprobacillus	0 (-0.08, 0.09)
ZMGH1_adjusted	ASV46	0.00998796	-0.188766	0.208742	0.101278	0.921461	971	73.0175	38	0	156	Bacteria	Firmicutes	Clostridia	Oscillospirales	Ruminococcaceae	[Eubacterium] siraeum group	0.01 (-0.19, 0.21)
ZCML_adjusted	ASV2119	0.00364566	-0.0699928	0.0772842	0.0375235	0.922622	971	9.47477	0	0	0	Bacteria	Firmicutes	Clostridia	Christensenellales	Christensenellaceae	Christensenella	0 (-0.07, 0.08)
ZMGH1_adjusted	ASV1397	0.00274721	-0.0529709	0.0584653	0.0283919	0.922937	971	1.95675	0	0	0	Bacteria	Firmicutes	Bacilli	Lactobacillales	Lactobacillaceae	Lactiplantibacillus	0 (-0.05, 0.06)
ZCML_adjusted	ASV177	-0.00463416	-0.101175	0.0919067	0.0491937	0.924968	971	4.22245	0	0	0	Bacteria	Firmicutes	Negativicutes	Acidaminococcales	Acidaminococcaceae	Succiniclasticum	0 (-0.1, 0.09)
ZCML_adjusted	ASV2160	-0.00301873	-0.0663052	0.0602677	0.0322485	0.92544	971	6.59114	0	0	0	Bacteria	Firmicutes	Clostridia	Oscillospirales	Ruminococcaceae	Phocea	0 (-0.07, 0.06)
ZMGH1_adjusted	ASV589	-0.00464506	-0.102488	0.0931976	0.0498571	0.92579	971	4.94336	0	0	0	Bacteria	Firmicutes	Negativicutes	Veillonellales-Selenomonadales	Veillonellaceae	Megasphaera	0 (-0.1, 0.09)
ZCEL_adjusted	ASV1812	0.00254832	-0.054107	0.0592036	0.0288695	0.92968	971	3.8105	0	0	0	Bacteria	Firmicutes	Clostridia	Eubacteriales	Eubacteriaceae	Eubacterium	0 (-0.05, 0.06)
ZCML_adjusted	ASV251	-0.00691808	-0.168718	0.154882	0.0824475	0.933147	971	60.9681	9	0	32.5	Bacteria	Bacteroidota	Bacteroidia	Bacteroidales	Marinifilaceae	Odoribacter	-0.01 (-0.17, 0.15)
ZMGH1_adjusted	ASV378	0.00659394	-0.151764	0.164952	0.0806936	0.93489	971	41.0917	0	0	12	Bacteria	Firmicutes	Clostridia	Oscillospirales	Ruminococcaceae	DTU089	0.01 (-0.15, 0.16)
ZMGH1_adjusted	ASV503	0.00467609	-0.115543	0.124895	0.0612593	0.939171	971	10.2987	0	0	0	Bacteria	Firmicutes	Clostridia	Lachnospirales	Lachnospiraceae	Tuzzerella	0 (-0.12, 0.12)
ZCML_adjusted	ASV2872	0.001726	-0.0439145	0.0473665	0.0232567	0.940855	971	1.85376	0	0	0	Bacteria	Actinobacteriota	Actinobacteria	Bifidobacteriales	Bifidobacteriaceae	Alloscardovia	0 (-0.04, 0.05)
ZCEL_adjusted	ASV151	-0.00590014	-0.16721	0.15541	0.0821976	0.942792	971	64.1607	12	0	29	Bacteria	Firmicutes	Clostridia	Oscillospirales	Ruminococcaceae	UBA1819	-0.01 (-0.17, 0.16)
ZCML_adjusted	ASV1195	-0.00328755	-0.0983846	0.0918095	0.048458	0.945925	971	15.9629	0	0	0	Bacteria	Firmicutes	Clostridia	Oscillospirales	Oscillospiraceae	UCG-007	0 (-0.1, 0.09)
ZCEL_adjusted	ASV46	0.0063655	-0.183329	0.19606	0.0966614	0.947508	971	73.0175	38	0	156	Bacteria	Firmicutes	Clostridia	Oscillospirales	Ruminococcaceae	[Eubacterium] siraeum group	0.01 (-0.18, 0.2)
ZCEL_adjusted	ASV20	-0.0032744	-0.103824	0.0972749	0.0512362	0.949057	971	98.9701	1189	406	2539.5	Bacteria	Bacteroidota	Bacteroidia	Bacteroidales	Bacteroidaceae	Bacteroides	0 (-0.1, 0.1)
ZMGH1_adjusted	ASV330	-0.00417357	-0.132356	0.124009	0.0653173	0.949066	971	11.0196	0	0	0	Bacteria	Bacteroidota	Bacteroidia	Bacteroidales	Prevotellaceae	Prevotella_7	0 (-0.13, 0.12)
ZMGH1_adjusted	ASV104	0.00708718	-0.217243	0.231418	0.114311	0.950576	971	39.4439	0	0	87.5	Bacteria	Firmicutes	Bacilli	Erysipelotrichales	Erysipelotrichaceae	Holdemanella	0.01 (-0.22, 0.23)
ZMGH1_adjusted	ASV446	-0.00453275	-0.14836	0.139294	0.073289	0.950697	971	19.8764	0	0	0	Bacteria	Actinobacteriota	Coriobacteriia	Coriobacteriales	Eggerthellaceae	Enterorhabdus	0 (-0.15, 0.14)
ZCEL_adjusted	ASV1553	-0.00236676	-0.0777385	0.073005	0.0384067	0.950876	971	6.9001	0	0	0	Bacteria	Actinobacteriota	Coriobacteriia	Coriobacteriales	Eggerthellaceae	Gordonibacter	0 (-0.08, 0.07)
ZCML_adjusted	ASV456	0.0049971	-0.155555	0.16555	0.0818117	0.951308	971	23.275	0	0	0	Bacteria	Firmicutes	Clostridia	Peptococcales	Peptococcaceae	Peptococcus	0 (-0.16, 0.17)
ZCEL_adjusted	ASV50	0.00438719	-0.142403	0.151178	0.0747991	0.953241	971	90.2163	180	55	454	Bacteria	Firmicutes	Clostridia	Lachnospirales	Lachnospiraceae	Lachnospiraceae NK4A136 group	0 (-0.14, 0.15)
ZCML_adjusted	ASV712	0.00346481	-0.113986	0.120915	0.0598485	0.953846	971	21.4212	0	0	0	Bacteria	Firmicutes	Clostridia	Peptostreptococcales-Tissierellales	Anaerovoracaceae	[Eubacterium] brachy group	0 (-0.11, 0.12)
ZCEL_adjusted	ASV1099	-0.00186944	-0.0659704	0.0622315	0.0326635	0.954371	971	3.60453	0	0	0	Bacteria	Firmicutes	Clostridia	Lachnospirales	Lachnospiraceae	Epulopiscium	0 (-0.07, 0.06)
ZMGH1_adjusted	ASV1031	-0.0024047	-0.0882606	0.0834512	0.043749	0.956177	971	7.31205	0	0	0	Bacteria	Firmicutes	Bacilli	Erysipelotrichales	Erysipelotrichaceae	[Clostridium] innocuum group	0 (-0.09, 0.08)
ZMGH1_adjusted	ASV50	-0.00419823	-0.158	0.149604	0.0783718	0.957291	971	90.2163	180	55	454	Bacteria	Firmicutes	Clostridia	Lachnospirales	Lachnospiraceae	Lachnospiraceae NK4A136 group	0 (-0.16, 0.15)
ZCEL_adjusted	ASV537	-0.00335881	-0.128256	0.121539	0.0636431	0.957922	971	17.4047	0	0	0	Bacteria	Firmicutes	Negativicutes	Veillonellales-Selenomonadales	Veillonellaceae	Veillonella	0 (-0.13, 0.12)
ZCEL_adjusted	ASV83	0.00377676	-0.1397	0.147254	0.0731108	0.958812	971	87.5386	81	32	171.5	Bacteria	Firmicutes	Clostridia	Oscillospirales	Butyricicoccaceae	Butyricicoccus	0 (-0.14, 0.15)
ZCML_adjusted	ASV2894	-0.00124926	-0.0530367	0.0505381	0.026389	0.962252	971	6.1792	0	0	0	Bacteria	Firmicutes	Clostridia	Oscillospirales	Oscillospiraceae	Papillibacter	0 (-0.05, 0.05)
ZCML_adjusted	ASV166	0.00364986	-0.151022	0.158322	0.0788151	0.963074	971	13.3883	0	0	0	Bacteria	Firmicutes	Bacilli	Erysipelotrichales	Erysipelatoclostridiaceae	Catenibacterium	0 (-0.15, 0.16)
ZCEL_adjusted	ASV715	0.00115727	-0.0507588	0.0530733	0.0264545	0.965116	971	1.23584	0	0	0	Bacteria	Proteobacteria	Gammaproteobacteria	Enterobacterales	Hafniaceae	Hafnia-Obesumbacterium	0 (-0.05, 0.05)
ZMGH1_adjusted	ASV1099	0.00142164	-0.0657411	0.0685843	0.0342237	0.966874	971	3.60453	0	0	0	Bacteria	Firmicutes	Clostridia	Lachnospirales	Lachnospiraceae	Epulopiscium	0 (-0.07, 0.07)
ZCEL_adjusted	ASV201	-0.00352045	-0.17757	0.170529	0.0886892	0.968345	971	41.4006	0	0	35	Bacteria	Firmicutes	Clostridia	Lachnospirales	Lachnospiraceae	Lachnospiraceae UCG-001	0 (-0.18, 0.17)
ZCML_adjusted	ASV1481	0.00147425	-0.076142	0.0790905	0.0395504	0.970273	971	9.78373	0	0	0	Archaea	Euryarchaeota	Methanobacteria	Methanobacteriales	Methanobacteriaceae	Methanobrevibacter	0 (-0.08, 0.08)
ZMGH1_adjusted	ASV76	-0.00376988	-0.211072	0.203532	0.105633	0.971538	971	49.8455	0	0	59.5	Bacteria	Verrucomicrobiota	Verrucomicrobiae	Verrucomicrobiales	Akkermansiaceae	Akkermansia	0 (-0.21, 0.2)
ZCEL_adjusted	ASV503	0.00194646	-0.112793	0.116686	0.0584669	0.973449	971	10.2987	0	0	0	Bacteria	Firmicutes	Clostridia	Lachnospirales	Lachnospiraceae	Tuzzerella	0 (-0.11, 0.12)
ZCML_adjusted	ASV860	0.00137007	-0.0911502	0.0938903	0.0471449	0.976822	971	6.1792	0	0	0	Bacteria	Firmicutes	Negativicutes	Veillonellales-Selenomonadales	Selenomonadaceae	Mitsuokella	0 (-0.09, 0.09)
ZCEL_adjusted	ASV447	0.000749682	-0.0514343	0.0529337	0.0265911	0.977514	971	1.33883	0	0	0	Bacteria	Proteobacteria	Gammaproteobacteria	Enterobacterales	Enterobacteriaceae	Enterobacter	0 (-0.05, 0.05)
ZCEL_adjusted	ASV3567	0.000550191	-0.0438469	0.0449473	0.0226231	0.980603	971	2.16272	0	0	0	Bacteria	Firmicutes	Bacilli	Erysipelotrichales	Erysipelotrichaceae	Faecalicoccus	0 (-0.04, 0.04)
ZMGH1_adjusted	ASV20	-0.00117475	-0.106527	0.104177	0.0536836	0.982546	971	98.9701	1189	406	2539.5	Bacteria	Bacteroidota	Bacteroidia	Bacteroidales	Bacteroidaceae	Bacteroides	0 (-0.11, 0.1)
ZCML_adjusted	ASV283	-0.00145887	-0.162117	0.159199	0.0818655	0.985786	971	28.6303	0	0	14	Bacteria	Actinobacteriota	Coriobacteriia	Coriobacteriales	Eggerthellaceae	Senegalimassilia	0 (-0.16, 0.16)
ZCML_adjusted	ASV238	0.00155436	-0.177705	0.180814	0.0913439	0.986427	971	47.6828	0	0	36	Bacteria	Firmicutes	Clostridia	Lachnospirales	Lachnospiraceae	Lachnospiraceae UCG-004	0 (-0.18, 0.18)
ZCML_adjusted	ASV1630	-0.00015527	-0.0424878	0.0421773	0.0215711	0.994258	971	1.02987	0	0	0	Bacteria	Bacteroidota	Bacteroidia	Bacteroidales	Rikenellaceae	Rikenella	0 (-0.04, 0.04)
ZCEL_adjusted	ASV19	0.000711566	-0.212138	0.213561	0.10846	0.994767	971	77.9609	193	18	596	Bacteria	Actinobacteriota	Actinobacteria	Bifidobacteriales	Bifidobacteriaceae	Bifidobacterium	0 (-0.21, 0.21)
ZCML_adjusted	ASV146	-0.000475938	-0.191064	0.190112	0.0971168	0.996091	971	46.138	0	0	38	Bacteria	Firmicutes	Bacilli	Erysipelotrichales	Erysipelotrichaceae	Turicibacter	0 (-0.19, 0.19)
ZCEL_adjusted	ASV576	-0.000105816	-0.106478	0.106267	0.0542036	0.998443	971	9.68074	0	0	0	Bacteria	Actinobacteriota	Coriobacteriia	Coriobacteriales	Eggerthellaceae	Eggerthella	0 (-0.11, 0.11)

## Sheet: suppl table 6
Factor	Taxon	Beta	CI95_L	CI95_U	Se	p	N	presence	median.count	IQR.L	IQR.U	fdr	description	Superclass1	Superclass2	95% CI
ZCML_adjusted	PWY-6562	8.14294	3.3464	12.9395	2.44439	0.000895163	1052	5.70342	0	0	0	0.18101	norspermidine biosynthesis	Biosynthesis	Amine and Polyamine Biosynthesis	8.14 (3.35, 12.94)
ZMGH1_adjusted	PWY-7332	-149.801	-240.711	-58.8912	46.3289	0.00126201	1052	96.3878	742.559	322.375	1468.74	0.18101	superpathway of UDP-N-acetylglucosamine-derived O-antigen building blocks biosynthesis	Biosynthesis	Carbohydrate Biosynthesis	-149.8 (-240.71, -58.89)
ZCML_adjusted	GALLATE-DEGRADATION-II-PWY	3.88784	1.52572	6.24997	1.20377	0.00127833	1052	5.70342	0	0	0	0.18101	gallate degradation I	Degradation/Utilization/Assimilation	Aromatic Compound Degradation	3.89 (1.53, 6.25)
ZCEL_adjusted	PWY-7332	-142.856	-229.858	-55.8534	44.3375	0.00131288	1052	96.3878	742.559	322.375	1468.74	0.18101	superpathway of UDP-N-acetylglucosamine-derived O-antigen building blocks biosynthesis	Biosynthesis	Carbohydrate Biosynthesis	-142.86 (-229.86, -55.85)
ZCML_adjusted	PWY-6182	4.19887	1.63433	6.76341	1.30693	0.00135532	1052	6.27376	0	0	0	0.18101	superpathway of salicylate degradation	Degradation/Utilization/Assimilation	Aromatic Compound Degradation	4.2 (1.63, 6.76)
ZCML_adjusted	PWY-6185	4.3612	1.69137	7.03103	1.36058	0.00139024	1052	6.27376	0	0	0	0.18101	4-methylcatechol degradation (ortho cleavage)	Degradation/Utilization/Assimilation	Aromatic Compound Degradation	4.36 (1.69, 7.03)
ZCML_adjusted	PWY-5181	5.15139	1.97505	8.32772	1.61871	0.00150426	1052	6.27376	0	0	0	0.18101	toluene degradation III (aerobic) (via p-cresol)	Degradation/Utilization/Assimilation	Aromatic Compound Degradation	5.15 (1.98, 8.33)
ZMGH1_adjusted	P162-PWY	-42.1718	-68.1886	-16.1551	13.2585	0.00151289	1052	82.9848	170.394	42.9357	364.141	0.18101	L-glutamate degradation V (via hydroxyglutarate)	Degradation/Utilization/Assimilation	Amino Acid Degradation	-42.17 (-68.19, -16.16)
ZCML_adjusted	METHYLGALLATE-DEGRADATION-PWY	4.65961	1.7506	7.56862	1.48247	0.00171928	1052	5.70342	0	0	0	0.18101	methylgallate degradation	Degradation/Utilization/Assimilation	Aromatic Compound Degradation	4.66 (1.75, 7.57)
ZCML_adjusted	GALLATE-DEGRADATION-I-PWY	3.73574	1.40345	6.06802	1.18856	0.00171967	1052	5.70342	0	0	0	0.18101	gallate degradation II	Degradation/Utilization/Assimilation	Aromatic Compound Degradation	3.74 (1.4, 6.07)
ZCEL_adjusted	P162-PWY	-39.2634	-64.1675	-14.3593	12.6915	0.00203018	1052	82.9848	170.394	42.9357	364.141	0.18101	L-glutamate degradation V (via hydroxyglutarate)	Degradation/Utilization/Assimilation	Amino Acid Degradation	-39.26 (-64.17, -14.36)
ZCML_adjusted	PWY-5417	4.33618	1.56682	7.10555	1.41131	0.00217883	1052	9.31559	0	0	0	0.18101	catechol degradation III (ortho-cleavage pathway)	Degradation/Utilization/Assimilation	Aromatic Compound Degradation	4.34 (1.57, 7.11)
ZCML_adjusted	PWY-5431	4.33618	1.56682	7.10555	1.41131	0.00217883	1052	9.31559	0	0	0	0.18101	aromatic compounds degradation via &beta;-ketoadipate	Degradation/Utilization/Assimilation	Aromatic Compound Degradation	4.34 (1.57, 7.11)
ZCML_adjusted	CATECHOL-ORTHO-CLEAVAGE-PWY	3.89977	1.36799	6.43154	1.29023	0.00256864	1052	9.31559	0	0	0	0.198152	catechol degradation to &beta;-ketoadipate	Degradation/Utilization/Assimilation	Aromatic Compound Degradation	3.9 (1.37, 6.43)
ZCEL_adjusted	PWY-2941	220.455	68.3579	372.553	77.5111	0.00454069	1052	99.8099	1592.29	771.946	3139.26	0.326929	L-lysine biosynthesis II	Biosynthesis	Amino Acid Biosynthesis	220.46 (68.36, 372.55)
ZCML_adjusted	PWY-6396	38.8019	11.0931	66.5108	14.1208	0.00610339	1052	90.1141	120.376	29.3678	355.933	0.393131	superpathway of 2,3-butanediol biosynthesis	Biosynthesis	Other Biosynthesis	38.8 (11.09, 66.51)
ZCEL_adjusted	PWY-5676	-220.386	-378.027	-62.7446	80.3361	0.00618817	1052	99.8099	5637.73	3612.71	8370.04	0.393131	acetyl-CoA fermentation to butanoate II	Generation of Precursor Metabolites and Energy	Fermentation	-220.39 (-378.03, -62.74)
ZCML_adjusted	PWY-5415	10.2475	2.71582	17.7793	3.83827	0.00770836	1052	22.5285	0	0	0	0.452187	catechol degradation I (meta-cleavage pathway)	Degradation/Utilization/Assimilation	Aromatic Compound Degradation	10.25 (2.72, 17.78)
ZCML_adjusted	PROTOCATECHUATE-ORTHO-CLEAVAGE-PWY	6.04218	1.58348	10.5009	2.27222	0.00795515	1052	9.98099	0	0	0	0.452187	protocatechuate degradation II (ortho-cleavage pathway)	Degradation/Utilization/Assimilation	Aromatic Compound Degradation	6.04 (1.58, 10.5)
ZMGH1_adjusted	PWY-5910	100.528	23.6394	177.416	39.1833	0.0104411	1052	86.2167	124	17.0671	468.945	0.541072	superpathway of geranylgeranyldiphosphate biosynthesis I (via mevalonate)	Biosynthesis	Polyprenyl Biosynthesis	100.53 (23.64, 177.42)
ZMGH1_adjusted	PWY-922	77.3496	18.1277	136.572	30.1803	0.0105209	1052	86.2167	86.9098	11.9508	330.048	0.541072	mevalonate pathway I	Biosynthesis	Secondary Metabolite Biosynthesis	77.35 (18.13, 136.57)
ZCEL_adjusted	CHLOROPHYLL-SYN	-0.356086	-0.632973	-0.0791988	0.141105	0.0117674	1052	1.9962	0	0	0	0.577671	chlorophyllide a biosynthesis I (aerobic, light-dependent)	Biosynthesis	Tetrapyrrole Biosynthesis	-0.36 (-0.63, -0.08)
ZMGH1_adjusted	PWY-5005	-69.1135	-124.095	-14.1322	28.0193	0.0138005	1052	90.6844	252.039	77.575	660.078	0.627121	biotin biosynthesis II	Biosynthesis	Cofactor, Carrier, and Vitamin Biosynthesis	-69.11 (-124.09, -14.13)
ZMGH1_adjusted	PWY-5529	-0.367765	-0.661007	-0.074523	0.14944	0.0140201	1052	0.95057	0	0	0	0.627121	superpathway of bacteriochlorophyll a biosynthesis	Biosynthesis	Tetrapyrrole Biosynthesis	-0.37 (-0.66, -0.07)
ZCML_adjusted	PWY-6383	0.750241	0.148951	1.35153	0.306426	0.0145167	1052	6.93916	0	0	0	0.627121	mono-trans, poly-cis decaprenyl phosphate biosynthesis	Biosynthesis	Cofactor, Carrier, and Vitamin Biosynthesis	0.75 (0.15, 1.35)
ZCEL_adjusted	PWY-5507	-29.4868	-53.5059	-5.46758	12.2405	0.0161732	1052	34.3156	0	0	106.336	0.647121	adenosylcobalamin biosynthesis I (early cobalt insertion)	Biosynthesis	Cofactor, Carrier, and Vitamin Biosynthesis	-29.49 (-53.51, -5.47)
ZCML_adjusted	CHLOROPHYLL-SYN	-0.34329	-0.622939	-0.0636419	0.142513	0.016178	1052	1.9962	0	0	0	0.647121	chlorophyllide a biosynthesis I (aerobic, light-dependent)	Biosynthesis	Tetrapyrrole Biosynthesis	-0.34 (-0.62, -0.06)
ZCML_adjusted	PWY-5265	90.416	15.9721	164.86	37.9376	0.0173396	1052	51.1407	27.7134	0	414.934	0.668814	peptidoglycan biosynthesis II (staphylococci)	Biosynthesis	Cell Structure Biosynthesis	90.42 (15.97, 164.86)
ZMGH1_adjusted	PWY-2941	191.714	32.5877	350.841	81.0931	0.0182575	1052	99.8099	1592.29	771.946	3139.26	0.679933	L-lysine biosynthesis II	Biosynthesis	Amino Acid Biosynthesis	191.71 (32.59, 350.84)
ZMGH1_adjusted	PWY-5507	-29.5403	-54.6449	-4.4357	12.7937	0.0211419	1052	34.3156	0	0	106.336	0.740735	adenosylcobalamin biosynthesis I (early cobalt insertion)	Biosynthesis	Cofactor, Carrier, and Vitamin Biosynthesis	-29.54 (-54.64, -4.44)
ZCEL_adjusted	PWY-5005	-61.7971	-114.433	-9.16125	26.824	0.0214321	1052	90.6844	252.039	77.575	660.078	0.740735	biotin biosynthesis II	Biosynthesis	Cofactor, Carrier, and Vitamin Biosynthesis	-61.8 (-114.43, -9.16)
ZCML_adjusted	PWY-2941	179.498	25.7151	333.282	78.3701	0.0221999	1052	99.8099	1592.29	771.946	3139.26	0.740735	L-lysine biosynthesis II	Biosynthesis	Amino Acid Biosynthesis	179.5 (25.72, 333.28)
ZCEL_adjusted	PWY-5529	-0.326628	-0.60737	-0.0458864	0.14307	0.0226336	1052	0.95057	0	0	0	0.740735	superpathway of bacteriochlorophyll a biosynthesis	Biosynthesis	Tetrapyrrole Biosynthesis	-0.33 (-0.61, -0.05)
ZCML_adjusted	PWY1G-0	0.282423	0.03628	0.528566	0.125438	0.0245642	1052	3.42205	0	0	0	0.763322	mycothiol biosynthesis	Biosynthesis	Cofactor, Carrier, and Vitamin Biosynthesis	0.28 (0.04, 0.53)
ZMGH1_adjusted	PWY-7234	237.863	30.3053	445.421	105.774	0.0247373	1052	99.8099	2773.35	1430.3	5184.22	0.763322	inosine-5'-phosphate biosynthesis III	Biosynthesis	Nucleoside and Nucleotide Biosynthesis	237.86 (30.31, 445.42)
ZCML_adjusted	PWY-5532	2.42724	0.252272	4.60221	1.10839	0.0287572	1052	18.8213	0	0	0	0.862717	adenosine nucleotides degradation IV	Degradation/Utilization/Assimilation	Nucleoside and Nucleotide Degradation	2.43 (0.25, 4.6)
ZCML_adjusted	PWY-5910	81.6418	7.27796	156.006	37.8968	0.0314467	1052	86.2167	124	17.0671	468.945	0.908814	superpathway of geranylgeranyldiphosphate biosynthesis I (via mevalonate)	Biosynthesis	Polyprenyl Biosynthesis	81.64 (7.28, 156.01)
ZCEL_adjusted	PWY-5910	80.1171	6.46443	153.77	37.5344	0.0330377	1052	86.2167	124	17.0671	468.945	0.908814	superpathway of geranylgeranyldiphosphate biosynthesis I (via mevalonate)	Biosynthesis	Polyprenyl Biosynthesis	80.12 (6.46, 153.77)
ZMGH1_adjusted	PWY-181	19.9037	1.59646	38.211	9.32963	0.0331288	1052	25.7605	0	0	16.3754	0.908814	photorespiration	Biosynthesis	Amino Acid Biosynthesis	19.9 (1.6, 38.21)
ZCEL_adjusted	PWY-922	61.4918	4.76155	118.222	28.9105	0.0336598	1052	86.2167	86.9098	11.9508	330.048	0.908814	mevalonate pathway I	Biosynthesis	Secondary Metabolite Biosynthesis	61.49 (4.76, 118.22)
ZCML_adjusted	PWY-922	61.4077	4.12455	118.691	29.1923	0.035659	1052	86.2167	86.9098	11.9508	330.048	0.928112	mevalonate pathway I	Biosynthesis	Secondary Metabolite Biosynthesis	61.41 (4.12, 118.69)
ZCEL_adjusted	PWY-6588	-297.02	-574.743	-19.2981	141.531	0.0360932	1052	100	5703.27	3402	8918.88	0.928112	pyruvate fermentation to acetone	Generation of Precursor Metabolites and Energy	Fermentation	-297.02 (-574.74, -19.3)
ZCEL_adjusted	P441-PWY	-308.127	-604.233	-12.0206	150.9	0.0414129	1052	96.8631	4447.52	1920.71	8622.83	0.987231	superpathway of N-acetylneuraminate degradation	Degradation/Utilization/Assimilation	Carboxylate Degradation	-308.13 (-604.23, -12.02)
ZCML_adjusted	PWY-6165	3.00819	0.0969518	5.91943	1.48361	0.0428563	1052	15.3992	0	0	0	0.987231	chorismate biosynthesis II (archaea)	Biosynthesis	Aromatic Compound Biosynthesis	3.01 (0.1, 5.92)
ZMGH1_adjusted	PWY-5180	30.0883	0.48579	59.6908	15.0859	0.0463638	1052	22.5285	0	0	0	0.987231	toluene degradation I (aerobic) (via o-cresol)	Degradation/Utilization/Assimilation	Aromatic Compound Degradation	30.09 (0.49, 59.69)
ZMGH1_adjusted	PWY-5182	30.0883	0.48579	59.6908	15.0859	0.0463638	1052	22.5285	0	0	0	0.987231	toluene degradation II (aerobic) (via 4-methylcatechol)	Degradation/Utilization/Assimilation	Aromatic Compound Degradation	30.09 (0.49, 59.69)
ZMGH1_adjusted	P163-PWY	-26.6827	-53.2537	-0.11179	13.5409	0.0490457	1052	96.1027	331.469	155.058	588.514	0.987231	L-lysine fermentation to acetate and butanoate	Degradation/Utilization/Assimilation	Amino Acid Degradation	-26.68 (-53.25, -0.11)
ZCEL_adjusted	POLYAMINSYN3-PWY	-90.8026	-181.272	-0.333403	46.1043	0.0491632	1052	98.4791	1374.25	646.471	2669.23	0.987231	superpathway of polyamine biosynthesis II	Biosynthesis	Amine and Polyamine Biosynthesis	-90.8 (-181.27, -0.33)
ZCML_adjusted	PWY-5676	-159.573	-319.025	-0.121137	81.259	0.0498265	1052	99.8099	5637.73	3612.71	8370.04	0.987231	acetyl-CoA fermentation to butanoate II	Generation of Precursor Metabolites and Energy	Fermentation	-159.57 (-319.03, -0.12)
ZMGH1_adjusted	PWY-5417	2.86081	-0.0130391	5.73466	1.46455	0.0510466	1052	9.31559	0	0	0	0.987231	catechol degradation III (ortho-cleavage pathway)	Degradation/Utilization/Assimilation	Aromatic Compound Degradation	2.86 (-0.01, 5.73)
ZMGH1_adjusted	PWY-5431	2.86081	-0.0130391	5.73466	1.46455	0.0510466	1052	9.31559	0	0	0	0.987231	aromatic compounds degradation via &beta;-ketoadipate	Degradation/Utilization/Assimilation	Aromatic Compound Degradation	2.86 (-0.01, 5.73)
ZMGH1_adjusted	CATECHOL-ORTHO-CLEAVAGE-PWY	2.59624	-0.0307422	5.22322	1.33875	0.0527368	1052	9.31559	0	0	0	0.987231	catechol degradation to &beta;-ketoadipate	Degradation/Utilization/Assimilation	Aromatic Compound Degradation	2.6 (-0.03, 5.22)
ZCML_adjusted	PWY-6608	244.862	-4.33699	494.062	126.995	0.054115	1052	100	7723.47	4942.33	10559.6	0.987231	guanosine nucleotides degradation III	Degradation/Utilization/Assimilation	Nucleoside and Nucleotide Degradation	244.86 (-4.34, 494.06)
ZCML_adjusted	OANTIGEN-PWY	-164.541	-334.435	5.35343	86.5804	0.0576547	1052	100	17408.2	11511.1	22715.2	0.987231	O-antigen building blocks biosynthesis (E. coli)	Biosynthesis	Carbohydrate Biosynthesis	-164.54 (-334.43, 5.35)
ZMGH1_adjusted	PROTOCATECHUATE-ORTHO-CLEAVAGE-PWY	4.46244	-0.159704	9.08459	2.35551	0.0584426	1052	9.98099	0	0	0	0.987231	protocatechuate degradation II (ortho-cleavage pathway)	Degradation/Utilization/Assimilation	Aromatic Compound Degradation	4.46 (-0.16, 9.08)
ZCML_adjusted	PWY-5180	27.5714	-1.0379	56.1808	14.5797	0.0588938	1052	22.5285	0	0	0	0.987231	toluene degradation I (aerobic) (via o-cresol)	Degradation/Utilization/Assimilation	Aromatic Compound Degradation	27.57 (-1.04, 56.18)
ZCML_adjusted	PWY-5182	27.5714	-1.0379	56.1808	14.5797	0.0588938	1052	22.5285	0	0	0	0.987231	toluene degradation II (aerobic) (via 4-methylcatechol)	Degradation/Utilization/Assimilation	Aromatic Compound Degradation	27.57 (-1.04, 56.18)
ZMGH1_adjusted	PWY-6182	2.55174	-0.11104	5.21453	1.35699	0.0603299	1052	6.27376	0	0	0	0.987231	superpathway of salicylate degradation	Degradation/Utilization/Assimilation	Aromatic Compound Degradation	2.55 (-0.11, 5.21)
ZMGH1_adjusted	PWY-5177	-67.7497	-138.801	3.30106	36.2085	0.0616143	1052	98.0038	377.941	162.285	889.269	0.987231	glutaryl-CoA degradation	Degradation/Utilization/Assimilation	Carboxylate Degradation	-67.75 (-138.8, 3.3)
ZMGH1_adjusted	PWY-5181	3.1435	-0.154267	6.44127	1.68059	0.0617011	1052	6.27376	0	0	0	0.987231	toluene degradation III (aerobic) (via p-cresol)	Degradation/Utilization/Assimilation	Aromatic Compound Degradation	3.14 (-0.15, 6.44)
ZMGH1_adjusted	PWY-6185	2.63641	-0.1357	5.40853	1.41271	0.0622956	1052	6.27376	0	0	0	0.987231	4-methylcatechol degradation (ortho cleavage)	Degradation/Utilization/Assimilation	Aromatic Compound Degradation	2.64 (-0.14, 5.41)
ZCEL_adjusted	PWY-5180	26.8779	-1.45818	55.214	14.4405	0.0629878	1052	22.5285	0	0	0	0.987231	toluene degradation I (aerobic) (via o-cresol)	Degradation/Utilization/Assimilation	Aromatic Compound Degradation	26.88 (-1.46, 55.21)
ZCEL_adjusted	PWY-5182	26.8779	-1.45818	55.214	14.4405	0.0629878	1052	22.5285	0	0	0	0.987231	toluene degradation II (aerobic) (via 4-methylcatechol)	Degradation/Utilization/Assimilation	Aromatic Compound Degradation	26.88 (-1.46, 55.21)
ZCEL_adjusted	P163-PWY	-24.1193	-49.5524	1.31378	12.9611	0.0630422	1052	96.1027	331.469	155.058	588.514	0.987231	L-lysine fermentation to acetate and butanoate	Degradation/Utilization/Assimilation	Amino Acid Degradation	-24.12 (-49.55, 1.31)
ZMGH1_adjusted	PWY-5415	7.39661	-0.411938	15.2052	3.97934	0.0633476	1052	22.5285	0	0	0	0.987231	catechol degradation I (meta-cleavage pathway)	Degradation/Utilization/Assimilation	Aromatic Compound Degradation	7.4 (-0.41, 15.21)
ZCML_adjusted	PWY-6906	4.41156	-0.272241	9.09536	2.38693	0.0648578	1052	4.65779	0	0	0	0.987231	chitin derivatives degradation	Degradation/Utilization/Assimilation	Carbohydrate Degradation	4.41 (-0.27, 9.1)
ZMGH1_adjusted	PWY-5304	331.073	-20.9795	683.126	179.411	0.0652758	1052	100	5115.66	2880	8451.5	0.987231	superpathway of sulfur oxidation (Acidianus ambivalens)	Degradation/Utilization/Assimilation	Inorganic Nutrient Metabolism	331.07 (-20.98, 683.13)
ZMGH1_adjusted	CHLOROPHYLL-SYN	-0.268861	-0.558622	0.0208996	0.147666	0.0689369	1052	1.9962	0	0	0	0.987231	chlorophyllide a biosynthesis I (aerobic, light-dependent)	Biosynthesis	Tetrapyrrole Biosynthesis	-0.27 (-0.56, 0.02)
ZCEL_adjusted	PWY-181	16.2081	-1.32228	33.7385	8.93373	0.0699285	1052	25.7605	0	0	16.3754	0.987231	photorespiration	Biosynthesis	Amino Acid Biosynthesis	16.21 (-1.32, 33.74)
ZCEL_adjusted	PWY-5265	67.2563	-6.56119	141.074	37.6184	0.0740932	1052	51.1407	27.7134	0	414.934	0.987231	peptidoglycan biosynthesis II (staphylococci)	Biosynthesis	Cell Structure Biosynthesis	67.26 (-6.56, 141.07)
ZMGH1_adjusted	PWY-6383	0.56687	-0.0562605	1.19	0.317556	0.0745389	1052	6.93916	0	0	0	0.987231	mono-trans, poly-cis decaprenyl phosphate biosynthesis	Biosynthesis	Cofactor, Carrier, and Vitamin Biosynthesis	0.57 (-0.06, 1.19)
ZMGH1_adjusted	ARG+POLYAMINE-SYN	-182.19	-382.981	18.6014	102.326	0.0752916	1052	99.8099	2762.45	1340.72	4976.64	0.987231	superpathway of arginine and polyamine biosynthesis	Biosynthesis	Amine and Polyamine Biosynthesis	-182.19 (-382.98, 18.6)
ZCML_adjusted	P162-PWY	-22.7656	-47.9894	2.45818	12.8544	0.0768503	1052	82.9848	170.394	42.9357	364.141	0.987231	L-glutamate degradation V (via hydroxyglutarate)	Degradation/Utilization/Assimilation	Amino Acid Degradation	-22.77 (-47.99, 2.46)
ZCEL_adjusted	COLANSYN-PWY	-188.494	-397.353	20.3653	106.438	0.0768673	1052	100	5801.06	3425.9	8910.29	0.987231	colanic acid building blocks biosynthesis	Biosynthesis	Carbohydrate Biosynthesis	-188.49 (-397.35, 20.37)
ZCML_adjusted	PWY-6174	0.555717	-0.0662643	1.1777	0.31697	0.0798627	1052	9.69582	0	0	0	0.987231	mevalonate pathway II (archaea)	Biosynthesis	Secondary Metabolite Biosynthesis	0.56 (-0.07, 1.18)
ZCEL_adjusted	ARG+POLYAMINE-SYN	-171.604	-363.766	20.5591	97.9287	0.0800145	1052	99.8099	2762.45	1340.72	4976.64	0.987231	superpathway of arginine and polyamine biosynthesis	Biosynthesis	Amine and Polyamine Biosynthesis	-171.6 (-363.77, 20.56)
ZCML_adjusted	PWY-7391	0.677478	-0.0877444	1.4427	0.389968	0.0826392	1052	7.88973	0	0	0	0.987231	isoprene biosynthesis II (engineered)	Biosynthesis	Secondary Metabolite Biosynthesis	0.68 (-0.09, 1.44)
ZCML_adjusted	CODH-PWY	-13.7903	-29.4112	1.83064	7.96065	0.083518	1052	71.8631	33.7315	0	107.788	0.987231	reductive acetyl coenzyme A pathway	Degradation/Utilization/Assimilation	C1 Compound Utilization and Assimilation	-13.79 (-29.41, 1.83)
ZMGH1_adjusted	GALLATE-DEGRADATION-I-PWY	2.13388	-0.287877	4.55563	1.23416	0.0841065	1052	5.70342	0	0	0	0.987231	gallate degradation II	Degradation/Utilization/Assimilation	Aromatic Compound Degradation	2.13 (-0.29, 4.56)
ZMGH1_adjusted	METHYLGALLATE-DEGRADATION-PWY	2.6594	-0.361214	5.68001	1.53935	0.0843569	1052	5.70342	0	0	0	0.987231	methylgallate degradation	Degradation/Utilization/Assimilation	Aromatic Compound Degradation	2.66 (-0.36, 5.68)
ZMGH1_adjusted	KETOGLUCONMET-PWY	-1.69031	-3.61766	0.237045	0.982205	0.0855637	1052	1.42586	0	0	0	0.987231	ketogluconate metabolism	Degradation/Utilization/Assimilation	Carboxylate Degradation	-1.69 (-3.62, 0.24)
ZCEL_adjusted	NONMEVIPP-PWY	-167.615	-358.772	23.5419	97.4163	0.0856225	1052	100	24411	16038.6	30958.3	0.987231	methylerythritol phosphate pathway I	Biosynthesis	Secondary Metabolite Biosynthesis	-167.62 (-358.77, 23.54)
ZCEL_adjusted	PWY-7560	-167.615	-358.772	23.5419	97.4163	0.0856225	1052	100	24411	16038.6	30958.3	0.987231	methylerythritol phosphate pathway II	Biosynthesis	Secondary Metabolite Biosynthesis	-167.62 (-358.77, 23.54)
ZMGH1_adjusted	GALLATE-DEGRADATION-II-PWY	2.13862	-0.31485	4.59209	1.25032	0.0874829	1052	5.70342	0	0	0	0.987231	gallate degradation I	Degradation/Utilization/Assimilation	Aromatic Compound Degradation	2.14 (-0.31, 4.59)
ZCML_adjusted	PWY-7003	106.183	-15.9055	228.271	62.2179	0.0881928	1052	93.1559	543.51	169.241	1317.94	0.987231	glycerol degradation to butanol	Generation of Precursor Metabolites and Energy	Fermentation	106.18 (-15.91, 228.27)
ZCML_adjusted	RIBOSYN2-PWY	-165.366	-356.501	25.769	97.4052	0.0898637	1052	100	17635.1	11733.3	22970.7	0.987231	flavin biosynthesis I (bacteria and plants)	Biosynthesis	Cofactor, Carrier, and Vitamin Biosynthesis	-165.37 (-356.5, 25.77)
ZCEL_adjusted	COBALSYN-PWY	-173.849	-376.197	28.499	103.119	0.0921179	1052	100	20356.9	13719.9	26582.1	0.987231	adenosylcobalamin salvage from cobinamide I	Biosynthesis	Cofactor, Carrier, and Vitamin Biosynthesis	-173.85 (-376.2, 28.5)
ZMGH1_adjusted	POLYAMINSYN3-PWY	-81.0077	-175.592	13.5765	48.2014	0.0931425	1052	98.4791	1374.25	646.471	2669.23	0.987231	superpathway of polyamine biosynthesis II	Biosynthesis	Amine and Polyamine Biosynthesis	-81.01 (-175.59, 13.58)
ZCEL_adjusted	PWY-5531	-2.11353	-4.59003	0.362984	1.26206	0.0943048	1052	16.2548	0	0	0	0.987231	chlorophyllide a biosynthesis II (anaerobic)	Biosynthesis	Tetrapyrrole Biosynthesis	-2.11 (-4.59, 0.36)
ZCEL_adjusted	PWY-7159	-2.11353	-4.59003	0.362984	1.26206	0.0943048	1052	16.2548	0	0	0	0.987231	chlorophyllide a biosynthesis III (aerobic, light independent)	Biosynthesis	Tetrapyrrole Biosynthesis	-2.11 (-4.59, 0.36)
ZCML_adjusted	PWY-6167	1.00499	-0.174984	2.18496	0.601331	0.0949711	1052	9.69582	0	0	0	0.987231	flavin biosynthesis II (archaea)	Biosynthesis	Cofactor, Carrier, and Vitamin Biosynthesis	1 (-0.17, 2.18)
ZMGH1_adjusted	PWY-6562	4.23384	-0.750129	9.21782	2.5399	0.0958319	1052	5.70342	0	0	0	0.987231	norspermidine biosynthesis	Biosynthesis	Amine and Polyamine Biosynthesis	4.23 (-0.75, 9.22)
ZCML_adjusted	PWY-6654	0.575845	-0.102739	1.25443	0.345816	0.0961813	1052	9.69582	0	0	0	0.987231	phosphopantothenate biosynthesis III	Biosynthesis	Cofactor, Carrier, and Vitamin Biosynthesis	0.58 (-0.1, 1.25)
ZCML_adjusted	PWY-7286	0.385829	-0.0690344	0.840692	0.231805	0.0963253	1052	9.69582	0	0	0	0.987231	7-(3-amino-3-carboxypropyl)-wyosine biosynthesis	Macromolecule Modification	Nucleic Acid Processing	0.39 (-0.07, 0.84)
ZCML_adjusted	PWY-6141	0.337198	-0.060445	0.734842	0.202645	0.0964188	1052	9.69582	0	0	0	0.987231	archaetidylserine and archaetidylethanolamine biosynthesis	Biosynthesis	Fatty Acid and Lipid Biosynthesis	0.34 (-0.06, 0.73)
ZCML_adjusted	PWY-6350	0.360885	-0.0647768	0.786547	0.216923	0.0964859	1052	9.69582	0	0	0	0.987231	archaetidylinositol biosynthesis	Biosynthesis	Fatty Acid and Lipid Biosynthesis	0.36 (-0.06, 0.79)
ZCML_adjusted	PWY-5198	0.315924	-0.056747	0.688596	0.189918	0.096522	1052	9.69582	0	0	0	0.987231	factor 420 biosynthesis	Biosynthesis	Cofactor, Carrier, and Vitamin Biosynthesis	0.32 (-0.06, 0.69)
ZCML_adjusted	PWY-6349	0.384519	-0.0691109	0.838149	0.231176	0.0965533	1052	9.69582	0	0	0	0.987231	CDP-archaeol biosynthesis	Biosynthesis	Fatty Acid and Lipid Biosynthesis	0.38 (-0.07, 0.84)
ZCEL_adjusted	PWY-6182	2.15682	-0.392383	4.70601	1.29911	0.0971727	1052	6.27376	0	0	0	0.987231	superpathway of salicylate degradation	Degradation/Utilization/Assimilation	Aromatic Compound Degradation	2.16 (-0.39, 4.71)
ZCEL_adjusted	PWY-5181	2.6502	-0.506908	5.8073	1.6089	0.0998207	1052	6.27376	0	0	0	0.987231	toluene degradation III (aerobic) (via p-cresol)	Degradation/Utilization/Assimilation	Aromatic Compound Degradation	2.65 (-0.51, 5.81)
ZCML_adjusted	METHANOGENESIS-PWY	0.542541	-0.103993	1.18907	0.329483	0.0999363	1052	9.69582	0	0	0	0.987231	methanogenesis from H2 and CO2	Generation of Precursor Metabolites and Energy	Respiration	0.54 (-0.1, 1.19)
ZCML_adjusted	P241-PWY	0.496659	-0.0964277	1.08975	0.302245	0.10064	1052	9.69582	0	0	0	0.987231	coenzyme B biosynthesis	Biosynthesis	Cofactor, Carrier, and Vitamin Biosynthesis	0.5 (-0.1, 1.09)
ZCEL_adjusted	PWY-6185	2.2173	-0.436578	4.87119	1.35246	0.101422	1052	6.27376	0	0	0	0.987231	4-methylcatechol degradation (ortho cleavage)	Degradation/Utilization/Assimilation	Aromatic Compound Degradation	2.22 (-0.44, 4.87)
ZCEL_adjusted	KETOGLUCONMET-PWY	-1.53671	-3.38141	0.307991	0.940084	0.102428	1052	1.42586	0	0	0	0.987231	ketogluconate metabolism	Degradation/Utilization/Assimilation	Carboxylate Degradation	-1.54 (-3.38, 0.31)
ZCEL_adjusted	PWY-6562	3.9658	-0.80404	8.73564	2.43078	0.103092	1052	5.70342	0	0	0	0.987231	norspermidine biosynthesis	Biosynthesis	Amine and Polyamine Biosynthesis	3.97 (-0.8, 8.74)
ZCEL_adjusted	PWY-7377	-139.172	-306.696	28.3525	85.3726	0.103372	1052	96.4829	1360.53	466.319	3214.59	0.987231	cob(II)yrinate a,c-diamide biosynthesis I (early cobalt insertion)	Biosynthesis	Cofactor, Carrier, and Vitamin Biosynthesis	-139.17 (-306.7, 28.35)
ZCEL_adjusted	PWY-7254	-117.413	-259.198	24.3721	72.2556	0.104476	1052	98.7643	918.438	397.637	2037.92	0.987231	TCA cycle VII (acetate-producers)	Generation of Precursor Metabolites and Energy	TCA cycle	-117.41 (-259.2, 24.37)
ZCEL_adjusted	PWY-5509	-165.645	-366.021	34.7308	102.114	0.105076	1052	100	19736.2	13255.1	25739.1	0.987231	adenosylcobalamin biosynthesis from cobyrinate a,c-diamide I	Biosynthesis	Cofactor, Carrier, and Vitamin Biosynthesis	-165.65 (-366.02, 34.73)
ZCEL_adjusted	PWY-6269	-164.622	-364.375	35.1318	101.797	0.106151	1052	100	19818.2	13330.1	25876	0.987231	adenosylcobalamin salvage from cobinamide II	Biosynthesis	Cofactor, Carrier, and Vitamin Biosynthesis	-164.62 (-364.37, 35.13)
ZMGH1_adjusted	PWY-5676	-136.016	-301.134	29.1034	84.1469	0.106313	1052	99.8099	5637.73	3612.71	8370.04	0.987231	acetyl-CoA fermentation to butanoate II	Generation of Precursor Metabolites and Energy	Fermentation	-136.02 (-301.13, 29.1)
ZMGH1_adjusted	P441-PWY	-254.832	-564.483	54.8182	157.802	0.106642	1052	96.8631	4447.52	1920.71	8622.83	0.987231	superpathway of N-acetylneuraminate degradation	Degradation/Utilization/Assimilation	Carboxylate Degradation	-254.83 (-564.48, 54.82)
ZCEL_adjusted	GALLATE-DEGRADATION-I-PWY	1.90265	-0.415367	4.22067	1.18129	0.107563	1052	5.70342	0	0	0	0.987231	gallate degradation II	Degradation/Utilization/Assimilation	Aromatic Compound Degradation	1.9 (-0.42, 4.22)
ZCEL_adjusted	METHYLGALLATE-DEGRADATION-PWY	2.37286	-0.51836	5.26408	1.47341	0.107604	1052	5.70342	0	0	0	0.987231	methylgallate degradation	Degradation/Utilization/Assimilation	Aromatic Compound Degradation	2.37 (-0.52, 5.26)
ZCEL_adjusted	PWY-5028	-4.65965	-10.3641	1.04483	2.90708	0.109272	1052	12.6426	0	0	0	0.987231	L-histidine degradation II	Degradation/Utilization/Assimilation	Amino Acid Degradation	-4.66 (-10.36, 1.04)
ZMGH1_adjusted	PWY-6588	-237.154	-527.619	53.31	148.025	0.109434	1052	100	5703.27	3402	8918.88	0.987231	pyruvate fermentation to acetone	Generation of Precursor Metabolites and Energy	Fermentation	-237.15 (-527.62, 53.31)
ZCML_adjusted	PWY-7332	-71.9674	-160.145	16.2103	44.9366	0.109566	1052	96.3878	742.559	322.375	1468.74	0.987231	superpathway of UDP-N-acetylglucosamine-derived O-antigen building blocks biosynthesis	Biosynthesis	Carbohydrate Biosynthesis	-71.97 (-160.15, 16.21)
ZMGH1_adjusted	PWY-5531	-2.10968	-4.69783	0.478457	1.31895	0.110013	1052	16.2548	0	0	0	0.987231	chlorophyllide a biosynthesis II (anaerobic)	Biosynthesis	Tetrapyrrole Biosynthesis	-2.11 (-4.7, 0.48)
ZMGH1_adjusted	PWY-7159	-2.10968	-4.69783	0.478457	1.31895	0.110013	1052	16.2548	0	0	0	0.987231	chlorophyllide a biosynthesis III (aerobic, light independent)	Biosynthesis	Tetrapyrrole Biosynthesis	-2.11 (-4.7, 0.48)
ZCEL_adjusted	GALLATE-DEGRADATION-II-PWY	1.91204	-0.436306	4.2604	1.19675	0.110418	1052	5.70342	0	0	0	0.987231	gallate degradation I	Degradation/Utilization/Assimilation	Aromatic Compound Degradation	1.91 (-0.44, 4.26)
ZCML_adjusted	PWY-6470	92.6609	-21.9237	207.245	58.3939	0.112859	1052	84.7909	443.34	62.8552	1528.11	0.987231	peptidoglycan biosynthesis V (&beta;-lactam resistance)	Biosynthesis	Cell Structure Biosynthesis	92.66 (-21.92, 207.25)
ZMGH1_adjusted	PWY-6628	-251.433	-564.233	61.367	159.407	0.115034	1052	99.7148	5555.87	3003.23	9948.77	0.987231	superpathway of L-phenylalanine biosynthesis	Biosynthesis	Amino Acid Biosynthesis	-251.43 (-564.23, 61.37)
ZCEL_adjusted	GLYCOLYSIS-E-D	-181.285	-407.257	44.687	115.159	0.115743	1052	96.673	2464.56	979.963	5225.56	0.987231	superpathway of glycolysis and Entner-Doudoroff	Generation of Precursor Metabolites and Energy	Superpathways	-181.29 (-407.26, 44.69)
ZCEL_adjusted	PWY0-166	-185.259	-416.683	46.1644	117.937	0.116528	1052	100	6966.39	4218.29	10479.5	0.987231	superpathway of pyrimidine deoxyribonucleotides de novo biosynthesis (E. coli)	Biosynthesis	Nucleoside and Nucleotide Biosynthesis	-185.26 (-416.68, 46.16)
ZCEL_adjusted	PWY-5973	-160.703	-361.663	40.2577	102.412	0.116914	1052	100	27416.1	18435.2	35046.5	0.987231	cis-vaccenate biosynthesis	Biosynthesis	Fatty Acid and Lipid Biosynthesis	-160.7 (-361.66, 40.26)
ZMGH1_adjusted	ASPASN-PWY	-136.302	-306.827	34.2219	86.9016	0.117079	1052	100	19142.2	12745.3	24674.5	0.987231	superpathway of L-aspartate and L-asparagine biosynthesis	Biosynthesis	Amino Acid Biosynthesis	-136.3 (-306.83, 34.22)
ZMGH1_adjusted	PWY-6630	-249.063	-560.833	62.7065	158.882	0.117282	1052	99.7148	5540.32	2995.37	9910.5	0.987231	superpathway of L-tyrosine biosynthesis	Biosynthesis	Amino Acid Biosynthesis	-249.06 (-560.83, 62.71)
ZMGH1_adjusted	PWY-6728	-17.7597	-40.1643	4.64484	11.4177	0.120144	1052	28.7072	0	0	24.6876	0.987231	methylaspartate cycle	Generation of Precursor Metabolites and Energy	Generation of Precursor Metabolites and Energy	-17.76 (-40.16, 4.64)
ZCEL_adjusted	PWY-7527	-0.666632	-1.5088	0.175535	0.42918	0.120666	1052	1.61597	0	0	0	0.987231	L-methionine salvage cycle III	Biosynthesis	Amino Acid Biosynthesis	-0.67 (-1.51, 0.18)
ZCEL_adjusted	PWY-4361	-0.413472	-0.939182	0.112239	0.267909	0.123058	1052	1.61597	0	0	0	0.987231	S-methyl-5-thio-&alpha;-D-ribose 1-phosphate degradation	Biosynthesis	Amino Acid Biosynthesis	-0.41 (-0.94, 0.11)
ZCEL_adjusted	CATECHOL-ORTHO-CLEAVAGE-PWY	1.97352	-0.542149	4.48918	1.28202	0.124018	1052	9.31559	0	0	0	0.987231	catechol degradation to &beta;-ketoadipate	Degradation/Utilization/Assimilation	Aromatic Compound Degradation	1.97 (-0.54, 4.49)
ZCEL_adjusted	PWY-5417	2.15851	-0.59364	4.91066	1.40253	0.12411	1052	9.31559	0	0	0	0.987231	catechol degradation III (ortho-cleavage pathway)	Degradation/Utilization/Assimilation	Aromatic Compound Degradation	2.16 (-0.59, 4.91)
ZCEL_adjusted	PWY-5431	2.15851	-0.59364	4.91066	1.40253	0.12411	1052	9.31559	0	0	0	0.987231	aromatic compounds degradation via &beta;-ketoadipate	Degradation/Utilization/Assimilation	Aromatic Compound Degradation	2.16 (-0.59, 4.91)
ZCEL_adjusted	PWY-841	-261.194	-594.467	72.0787	169.841	0.124385	1052	100	8301.76	4998.96	12885.5	0.987231	superpathway of purine nucleotides de novo biosynthesis I	Biosynthesis	Nucleoside and Nucleotide Biosynthesis	-261.19 (-594.47, 72.08)
ZCEL_adjusted	PWY-7197	-168.733	-384.844	47.3775	110.133	0.125808	1052	100	3914.29	2203.49	6319.75	0.987231	pyrimidine deoxyribonucleotide phosphorylation	Biosynthesis	Nucleoside and Nucleotide Biosynthesis	-168.73 (-384.84, 47.38)
ZCML_adjusted	PWY-6148	0.949596	-0.273559	2.17275	0.623336	0.127964	1052	9.69582	0	0	0	0.987231	tetrahydromethanopterin biosynthesis	Biosynthesis	Cofactor, Carrier, and Vitamin Biosynthesis	0.95 (-0.27, 2.17)
ZCEL_adjusted	PWY-3781	-45.8834	-105.142	13.3755	30.1992	0.128978	1052	57.8897	23.9901	0	202.913	0.987231	aerobic respiration I (cytochrome c)	Generation of Precursor Metabolites and Energy	Electron Transfer Chains	-45.88 (-105.14, 13.38)
ZCEL_adjusted	PWY-5121	-146.12	-336.054	43.8144	96.793	0.13145	1052	100	23756.4	15553.6	30114.2	0.987231	superpathway of geranylgeranyl diphosphate biosynthesis II (via MEP)	Biosynthesis	Polyprenyl Biosynthesis	-146.12 (-336.05, 43.81)
ZMGH1_adjusted	GLYCOLYSIS-E-D	-181.313	-417.467	54.8404	120.347	0.132224	1052	96.673	2464.56	979.963	5225.56	0.987231	superpathway of glycolysis and Entner-Doudoroff	Generation of Precursor Metabolites and Energy	Superpathways	-181.31 (-417.47, 54.84)
ZCEL_adjusted	ASPASN-PWY	-124.788	-287.993	38.4168	83.1716	0.133825	1052	100	19142.2	12745.3	24674.5	0.987231	superpathway of L-aspartate and L-asparagine biosynthesis	Biosynthesis	Amino Acid Biosynthesis	-124.79 (-287.99, 38.42)
ZCEL_adjusted	PWY0-1261	-240.182	-555.105	74.7416	160.489	0.134814	1052	98.384	3047.12	1265.16	6634.1	0.987231	anhydromuropeptides recycling	Degradation/Utilization/Assimilation	Secondary Metabolite Degradation	-240.18 (-555.11, 74.74)
ZCEL_adjusted	PWY-6545	-117.946	-272.736	36.8435	78.8829	0.135167	1052	100	4137.52	2500.09	6313.23	0.987231	pyrimidine deoxyribonucleotides de novo biosynthesis III	Biosynthesis	Nucleoside and Nucleotide Biosynthesis	-117.95 (-272.74, 36.84)
ZMGH1_adjusted	ARGORNPROST-PWY	-39.4766	-91.7031	12.7499	26.6153	0.13832	1052	100	1306.18	754.207	1981.11	0.987231	arginine, ornithine and proline interconversion	Activation-Inactivation-Interconversion	Interconversion	-39.48 (-91.7, 12.75)
ZCEL_adjusted	PWY-7196	-241.807	-566.336	82.7214	165.384	0.144021	1052	100	6088.55	3487.81	9896.96	0.987231	superpathway of pyrimidine ribonucleosides salvage	Biosynthesis	Nucleoside and Nucleotide Biosynthesis	-241.81 (-566.34, 82.72)
ZCEL_adjusted	PWY0-162	-249.365	-587.955	89.2242	172.55	0.148712	1052	100	7617.83	4515.11	12191.9	0.987231	superpathway of pyrimidine ribonucleotides de novo biosynthesis	Biosynthesis	Nucleoside and Nucleotide Biosynthesis	-249.37 (-587.95, 89.22)
ZCML_adjusted	TRPSYN-PWY	-157.669	-371.817	56.4801	109.133	0.148836	1052	100	19897.8	13301.5	25697.9	0.987231	L-tryptophan biosynthesis	Biosynthesis	Amino Acid Biosynthesis	-157.67 (-371.82, 56.48)
ZCEL_adjusted	DENOVOPURINE2-PWY	-244.199	-576.807	88.4086	169.502	0.149976	1052	100	8688.19	5277.99	13312.6	0.987231	superpathway of purine nucleotides de novo biosynthesis II	Biosynthesis	Nucleoside and Nucleotide Biosynthesis	-244.2 (-576.81, 88.41)
ZMGH1_adjusted	GALACTUROCAT-PWY	-162.932	-386.558	60.6949	113.963	0.15311	1052	100	9278.61	6166.86	12918.5	0.987231	D-galacturonate degradation I	Degradation/Utilization/Assimilation	Carboxylate Degradation	-162.93 (-386.56, 60.69)
ZMGH1_adjusted	PWY-7254	-107.973	-256.175	40.228	75.5255	0.153127	1052	98.7643	918.438	397.637	2037.92	0.987231	TCA cycle VII (acetate-producers)	Generation of Precursor Metabolites and Energy	TCA cycle	-107.97 (-256.17, 40.23)
ZCEL_adjusted	PWY-6125	-222.732	-529.74	84.2762	156.456	0.154862	1052	100	6168.4	3586.05	9877.57	0.987231	superpathway of guanosine nucleotides de novo biosynthesis II	Biosynthesis	Nucleoside and Nucleotide Biosynthesis	-222.73 (-529.74, 84.28)
ZCEL_adjusted	UDPNAGSYN-PWY	-163.825	-390.32	62.6699	115.425	0.156108	1052	100	15051	9882.05	20489	0.987231	UDP-N-acetyl-D-glucosamine biosynthesis I	Biosynthesis	Carbohydrate Biosynthesis	-163.83 (-390.32, 62.67)
ZCML_adjusted	PWY-7234	144.748	-56.1041	345.6	102.357	0.157621	1052	99.8099	2773.35	1430.3	5184.22	0.987231	inosine-5'-phosphate biosynthesis III	Biosynthesis	Nucleoside and Nucleotide Biosynthesis	144.75 (-56.1, 345.6)
ZCEL_adjusted	PROTOCATECHUATE-ORTHO-CLEAVAGE-PWY	3.17615	-1.2506	7.60291	2.25594	0.15946	1052	9.98099	0	0	0	0.987231	protocatechuate degradation II (ortho-cleavage pathway)	Degradation/Utilization/Assimilation	Aromatic Compound Degradation	3.18 (-1.25, 7.6)
ZCEL_adjusted	POLYAMSYN-PWY	-101.552	-243.226	40.1228	72.1992	0.159863	1052	99.8099	1643.3	835.987	3130.01	0.987231	superpathway of polyamine biosynthesis I	Biosynthesis	Amine and Polyamine Biosynthesis	-101.55 (-243.23, 40.12)
ZCEL_adjusted	PWY-7228	-205.583	-495.696	84.5307	147.846	0.164671	1052	100	5482.16	3147.07	8855.02	0.987231	superpathway of guanosine nucleotides de novo biosynthesis I	Biosynthesis	Nucleoside and Nucleotide Biosynthesis	-205.58 (-495.7, 84.53)
ZCML_adjusted	NONMEVIPP-PWY	-136.262	-329.37	56.8459	98.4106	0.166466	1052	100	24411	16038.6	30958.3	0.987231	methylerythritol phosphate pathway I	Biosynthesis	Secondary Metabolite Biosynthesis	-136.26 (-329.37, 56.85)
ZCML_adjusted	PWY-7560	-136.262	-329.37	56.8459	98.4106	0.166466	1052	100	24411	16038.6	30958.3	0.987231	methylerythritol phosphate pathway II	Biosynthesis	Secondary Metabolite Biosynthesis	-136.26 (-329.37, 56.85)
ZMGH1_adjusted	POLYAMSYN-PWY	-104.258	-252.306	43.7897	75.4472	0.167312	1052	99.8099	1643.3	835.987	3130.01	0.987231	superpathway of polyamine biosynthesis I	Biosynthesis	Amine and Polyamine Biosynthesis	-104.26 (-252.31, 43.79)
ZCEL_adjusted	ARGORNPROST-PWY	-35.2016	-85.1884	14.7853	25.474	0.167313	1052	100	1306.18	754.207	1981.11	0.987231	arginine, ornithine and proline interconversion	Activation-Inactivation-Interconversion	Interconversion	-35.2 (-85.19, 14.79)
ZCEL_adjusted	PWY-1541	1.78429	-0.751474	4.32005	1.29226	0.167655	1052	8.26996	0	0	0	0.987231	superpathway of taurine degradation	Degradation/Utilization/Assimilation	Inorganic Nutrient Metabolism	1.78 (-0.75, 4.32)
ZCEL_adjusted	LEU-DEG2-PWY	-8.4003	-20.4823	3.68173	6.15717	0.172768	1052	42.0152	0	0	24.8138	0.987231	L-leucine degradation I	Degradation/Utilization/Assimilation	Amino Acid Degradation	-8.4 (-20.48, 3.68)
ZCEL_adjusted	PWY-7663	-154.361	-376.491	67.7692	113.201	0.17299	1052	100	28576.8	19248.7	36214.7	0.987231	gondoate biosynthesis (anaerobic)	Biosynthesis	Fatty Acid and Lipid Biosynthesis	-154.36 (-376.49, 67.77)
ZCEL_adjusted	PWY-7187	-133.381	-326.72	59.9589	98.5285	0.176121	1052	100	7914.82	5185.3	11269.8	0.987231	pyrimidine deoxyribonucleotides de novo biosynthesis II	Biosynthesis	Nucleoside and Nucleotide Biosynthesis	-133.38 (-326.72, 59.96)
ZCEL_adjusted	PWY-6123	-111.087	-272.34	50.1658	82.1767	0.176734	1052	100	23285.6	15345.4	29584.8	0.987231	inosine-5'-phosphate biosynthesis I	Biosynthesis	Nucleoside and Nucleotide Biosynthesis	-111.09 (-272.34, 50.17)
ZCEL_adjusted	PWY-5177	-46.1448	-114.196	21.9065	34.6799	0.183617	1052	98.0038	377.941	162.285	889.269	0.987231	glutaryl-CoA degradation	Degradation/Utilization/Assimilation	Carboxylate Degradation	-46.14 (-114.2, 21.91)
ZMGH1_adjusted	PWY-1541	1.7922	-0.857739	4.44214	1.35045	0.184764	1052	8.26996	0	0	0	0.987231	superpathway of taurine degradation	Degradation/Utilization/Assimilation	Inorganic Nutrient Metabolism	1.79 (-0.86, 4.44)
ZCEL_adjusted	PWY-6728	-14.4888	-35.9364	6.95881	10.93	0.185266	1052	28.7072	0	0	24.6876	0.987231	methylaspartate cycle	Generation of Precursor Metabolites and Energy	Generation of Precursor Metabolites and Energy	-14.49 (-35.94, 6.96)
ZCEL_adjusted	COA-PWY	-116.073	-288.874	56.7285	88.0619	0.18777	1052	100	22505.9	14886.4	28747.4	0.987231	coenzyme A biosynthesis I	Biosynthesis	Cofactor, Carrier, and Vitamin Biosynthesis	-116.07 (-288.87, 56.73)
ZCEL_adjusted	PWY-7200	-142.329	-354.254	69.5965	108	0.187844	1052	100	5088.22	3020	7879.54	0.987231	superpathway of pyrimidine deoxyribonucleoside salvage	Biosynthesis	Nucleoside and Nucleotide Biosynthesis	-142.33 (-354.25, 69.6)
ZCEL_adjusted	FUCCAT-PWY	153.862	-75.9034	383.628	117.092	0.189128	1052	100	5574.65	3632.41	8505.86	0.987231	fucose degradation	Degradation/Utilization/Assimilation	Carbohydrate Degradation	153.86 (-75.9, 383.63)
ZMGH1_adjusted	PWY0-1061	275.781	-136.851	688.412	210.283	0.18999	1052	100	12276.7	7738.05	18302.2	0.987231	superpathway of L-alanine biosynthesis	Biosynthesis	Amino Acid Biosynthesis	275.78 (-136.85, 688.41)
ZCEL_adjusted	PWY-5741	-7.63209	-19.0809	3.81676	5.83449	0.191132	1052	35.5513	0	0	15.4604	0.987231	ethylmalonyl-CoA pathway	Generation of Precursor Metabolites and Energy	Generation of Precursor Metabolites and Energy	-7.63 (-19.08, 3.82)
ZCML_adjusted	PWY-7007	0.176829	-0.0884796	0.442137	0.135205	0.191213	1052	2.18631	0	0	0	0.987231	methyl ketone biosynthesis	Generation of Precursor Metabolites and Energy	Generation of Precursor Metabolites and Energy	0.18 (-0.09, 0.44)
ZCML_adjusted	PWY-6572	-79.9163	-200.178	40.3459	61.2873	0.192538	1052	95.9125	488.352	152.553	1173.41	0.987231	chondroitin sulfate degradation I (bacterial)	Degradation/Utilization/Assimilation	Carbohydrate Degradation	-79.92 (-200.18, 40.35)
ZMGH1_adjusted	PWY-7315	176.805	-89.5198	443.13	135.723	0.192971	1052	99.9049	5063.1	3093.47	8116.14	0.987231	dTDP-N-acetylthomosamine biosynthesis	Biosynthesis	Carbohydrate Biosynthesis	176.81 (-89.52, 443.13)
ZCML_adjusted	P261-PWY	0.4469	-0.231802	1.1256	0.345876	0.196619	1052	14.924	0	0	0	0.987231	coenzyme M biosynthesis I	Biosynthesis	Cofactor, Carrier, and Vitamin Biosynthesis	0.45 (-0.23, 1.13)
ZCML_adjusted	HEXITOLDEGSUPER-PWY	-93.9314	-236.9	49.037	72.8587	0.197608	1052	99.6198	2864.61	1648.18	4617.95	0.987231	superpathway of hexitol degradation (bacteria)	Degradation/Utilization/Assimilation	Secondary Metabolite Degradation	-93.93 (-236.9, 49.04)
ZCML_adjusted	PWY-5973	-133.335	-336.323	69.6525	103.446	0.197707	1052	100	27416.1	18435.2	35046.5	0.987231	cis-vaccenate biosynthesis	Biosynthesis	Fatty Acid and Lipid Biosynthesis	-133.34 (-336.32, 69.65)
ZMGH1_adjusted	PWY-7527	-0.574314	-1.45467	0.30604	0.448641	0.200791	1052	1.61597	0	0	0	0.987231	L-methionine salvage cycle III	Biosynthesis	Amino Acid Biosynthesis	-0.57 (-1.45, 0.31)
ZMGH1_adjusted	TEICHOICACID-PWY	90.5441	-48.4178	229.506	70.8169	0.201338	1052	100	3638.78	2325.25	5493.94	0.987231	teichoic acid (poly-glycerol) biosynthesis	Biosynthesis	Cell Structure Biosynthesis	90.54 (-48.42, 229.51)
ZMGH1_adjusted	PWY-4361	-0.355377	-0.904924	0.194171	0.280057	0.204748	1052	1.61597	0	0	0	0.987231	S-methyl-5-thio-&alpha;-D-ribose 1-phosphate degradation	Biosynthesis	Amino Acid Biosynthesis	-0.36 (-0.9, 0.19)
ZMGH1_adjusted	COBALSYN-PWY	-136.776	-348.346	74.7941	107.819	0.204881	1052	100	20356.9	13719.9	26582.1	0.987231	adenosylcobalamin salvage from cobinamide I	Biosynthesis	Cofactor, Carrier, and Vitamin Biosynthesis	-136.78 (-348.35, 74.79)
ZCEL_adjusted	PWY-5022	-34.9096	-89.0243	19.205	27.5776	0.205846	1052	99.5247	551.078	222.951	1124.97	0.987231	4-aminobutanoate degradation V	Degradation/Utilization/Assimilation	Amine and Polyamine Degradation	-34.91 (-89.02, 19.21)
ZMGH1_adjusted	PWY-7242	-187.041	-477.239	103.158	147.889	0.206252	1052	100	13022.1	8643.31	17865.2	0.987231	D-fructuronate degradation	Degradation/Utilization/Assimilation	Carboxylate Degradation	-187.04 (-477.24, 103.16)
ZCEL_adjusted	HEXITOLDEGSUPER-PWY	-90.5116	-232.113	51.0898	72.162	0.210024	1052	99.6198	2864.61	1648.18	4617.95	0.987231	superpathway of hexitol degradation (bacteria)	Degradation/Utilization/Assimilation	Secondary Metabolite Degradation	-90.51 (-232.11, 51.09)
ZCEL_adjusted	PWY-6386	-113.953	-293.018	65.1125	91.2542	0.212044	1052	100	24195.3	16092.5	31102.5	0.987231	UDP-N-acetylmuramoyl-pentapeptide biosynthesis II (lysine-containing)	Biosynthesis	Cell Structure Biosynthesis	-113.95 (-293.02, 65.11)
ZCML_adjusted	PWY-5121	-121.88	-313.723	69.9634	97.7659	0.21281	1052	100	23756.4	15553.6	30114.2	0.987231	superpathway of geranylgeranyl diphosphate biosynthesis II (via MEP)	Biosynthesis	Polyprenyl Biosynthesis	-121.88 (-313.72, 69.96)
ZCML_adjusted	PWY-6897	-148.307	-382.031	85.4175	119.109	0.213366	1052	100	20632.2	13799.1	26567.3	0.987231	thiamin salvage II	Biosynthesis	Cofactor, Carrier, and Vitamin Biosynthesis	-148.31 (-382.03, 85.42)
ZCEL_adjusted	PWY-7242	-175.911	-453.634	101.811	141.531	0.214181	1052	100	13022.1	8643.31	17865.2	0.987231	D-fructuronate degradation	Degradation/Utilization/Assimilation	Carboxylate Degradation	-175.91 (-453.63, 101.81)
ZCEL_adjusted	PWY-6385	-109.32	-282.203	63.5635	88.1036	0.21496	1052	100	23633.1	15685.8	30394.8	0.987231	peptidoglycan biosynthesis III (mycobacteria)	Biosynthesis	Cell Structure Biosynthesis	-109.32 (-282.2, 63.56)
ZCML_adjusted	THREOCAT-PWY	13.3381	-7.79425	34.4705	10.7694	0.215803	1052	23.6692	0	0	0	0.987231	superpathway of L-threonine metabolism	Degradation/Utilization/Assimilation	Amino Acid Degradation	13.34 (-7.79, 34.47)
ZCML_adjusted	PWY-181	11.1797	-6.53575	28.8952	9.02804	0.215876	1052	25.7605	0	0	16.3754	0.987231	photorespiration	Biosynthesis	Amino Acid Biosynthesis	11.18 (-6.54, 28.9)
ZCML_adjusted	PWY-6876	26.9941	-15.7911	69.7792	21.8039	0.215984	1052	54.1825	27.9534	0	259.986	0.987231	isopropanol biosynthesis	Generation of Precursor Metabolites and Energy	Generation of Precursor Metabolites and Energy	26.99 (-15.79, 69.78)
ZCEL_adjusted	TRPSYN-PWY	-133.772	-345.921	78.3771	108.114	0.216249	1052	100	19897.8	13301.5	25697.9	0.987231	L-tryptophan biosynthesis	Biosynthesis	Amino Acid Biosynthesis	-133.77 (-345.92, 78.38)
ZCEL_adjusted	PWY-7234	124.95	-74.0192	323.919	101.398	0.218126	1052	99.8099	2773.35	1430.3	5184.22	0.987231	inosine-5'-phosphate biosynthesis III	Biosynthesis	Nucleoside and Nucleotide Biosynthesis	124.95 (-74.02, 323.92)
ZCEL_adjusted	PWY-6121	-110.909	-287.674	65.8561	90.0819	0.218529	1052	100	24900.6	16591	31719.4	0.987231	5-aminoimidazole ribonucleotide biosynthesis I	Biosynthesis	Nucleoside and Nucleotide Biosynthesis	-110.91 (-287.67, 65.86)
ZMGH1_adjusted	PWY-5509	-131.388	-340.885	78.1086	106.762	0.218732	1052	100	19736.2	13255.1	25739.1	0.987231	adenosylcobalamin biosynthesis from cobyrinate a,c-diamide I	Biosynthesis	Cofactor, Carrier, and Vitamin Biosynthesis	-131.39 (-340.88, 78.11)
ZCEL_adjusted	SULFATE-CYS-PWY	-126.855	-329.234	75.5241	103.135	0.218983	1052	100	3191.69	1659.68	5545.31	0.987231	superpathway of sulfate assimilation and cysteine biosynthesis	Degradation/Utilization/Assimilation	Inorganic Nutrient Metabolism	-126.85 (-329.23, 75.52)
ZCEL_adjusted	PWY-7229	-122.295	-317.993	73.4034	99.7306	0.220384	1052	100	26149.8	17486.6	33863.3	0.987231	superpathway of adenosine nucleotides de novo biosynthesis I	Biosynthesis	Nucleoside and Nucleotide Biosynthesis	-122.29 (-317.99, 73.4)
ZMGH1_adjusted	PWY0-1261	-205.219	-534.417	123.98	167.764	0.221512	1052	98.384	3047.12	1265.16	6634.1	0.987231	anhydromuropeptides recycling	Degradation/Utilization/Assimilation	Secondary Metabolite Degradation	-205.22 (-534.42, 123.98)
ZMGH1_adjusted	PWY-6269	-130.006	-338.852	78.8403	106.431	0.222174	1052	100	19818.2	13330.1	25876	0.987231	adenosylcobalamin salvage from cobinamide II	Biosynthesis	Cofactor, Carrier, and Vitamin Biosynthesis	-130.01 (-338.85, 78.84)
ZCML_adjusted	P221-PWY	-75.8098	-198.17	46.55	62.3563	0.224358	1052	98.289	1482.3	735.487	2742.52	0.987231	octane oxidation	Degradation/Utilization/Assimilation	Degradation/Utilization/Assimilation - Other	-75.81 (-198.17, 46.55)
ZCML_adjusted	PWY-5188	-152.213	-398.005	93.5787	125.259	0.224573	1052	100	11315.3	7565.46	15704.9	0.987231	tetrapyrrole biosynthesis I (from glutamate)	Biosynthesis	Tetrapyrrole Biosynthesis	-152.21 (-398.01, 93.58)
ZMGH1_adjusted	PWY-621	348.112	-218.216	914.44	288.609	0.228028	1052	100	25134.8	16888.1	34872	0.987231	sucrose degradation III (sucrose invertase)	Degradation/Utilization/Assimilation	Carbohydrate Degradation	348.11 (-218.22, 914.44)
ZCEL_adjusted	METH-ACETATE-PWY	232.21	-146.899	611.319	193.199	0.229671	1052	99.9049	8640.28	5350.24	13841.4	0.987231	methanogenesis from acetate	Generation of Precursor Metabolites and Energy	Respiration	232.21 (-146.9, 611.32)
ZMGH1_adjusted	P562-PWY	50.3599	-32.2137	132.933	42.0806	0.231681	1052	98.5741	708.89	333.945	1363.69	0.987231	myo-inositol degradation I	Degradation/Utilization/Assimilation	Secondary Metabolite Degradation	50.36 (-32.21, 132.93)
ZCEL_adjusted	PWY-7315	154.638	-100.265	409.541	129.902	0.234156	1052	99.9049	5063.1	3093.47	8116.14	0.987231	dTDP-N-acetylthomosamine biosynthesis	Biosynthesis	Carbohydrate Biosynthesis	154.64 (-100.26, 409.54)
ZMGH1_adjusted	PWY-7377	-106.013	-281.173	69.1475	89.2642	0.235253	1052	96.4829	1360.53	466.319	3214.59	0.987231	cob(II)yrinate a,c-diamide biosynthesis I (early cobalt insertion)	Biosynthesis	Cofactor, Carrier, and Vitamin Biosynthesis	-106.01 (-281.17, 69.15)
ZMGH1_adjusted	METH-ACETATE-PWY	239.562	-156.596	635.72	201.888	0.235654	1052	99.9049	8640.28	5350.24	13841.4	0.987231	methanogenesis from acetate	Generation of Precursor Metabolites and Energy	Respiration	239.56 (-156.6, 635.72)
ZCML_adjusted	SALVADEHYPOX-PWY	139.312	-91.1514	369.775	117.447	0.235831	1052	100	6046.69	3901.14	8554.89	0.987231	adenosine nucleotides degradation II	Degradation/Utilization/Assimilation	Nucleoside and Nucleotide Degradation	139.31 (-91.15, 369.77)
ZCEL_adjusted	PWY-5304	203.653	-133.581	540.888	171.859	0.236291	1052	100	5115.66	2880	8451.5	0.987231	superpathway of sulfur oxidation (Acidianus ambivalens)	Degradation/Utilization/Assimilation	Inorganic Nutrient Metabolism	203.65 (-133.58, 540.89)
ZCML_adjusted	PWY-5384	166.208	-110.467	442.884	140.998	0.23875	1052	100	10610.4	7027.38	15573.6	0.987231	sucrose degradation IV (sucrose phosphorylase)	Degradation/Utilization/Assimilation	Carbohydrate Degradation	166.21 (-110.47, 442.88)
ZCML_adjusted	PWY-5189	-143.523	-382.939	95.8925	122.01	0.239736	1052	100	10474.5	7062.81	14570.9	0.987231	tetrapyrrole biosynthesis II (from glycine)	Biosynthesis	Tetrapyrrole Biosynthesis	-143.52 (-382.94, 95.89)
ZCEL_adjusted	PWY-5104	-158.64	-423.654	106.375	135.055	0.240414	1052	100	29734.1	19705.2	38042.5	0.987231	L-isoleucine biosynthesis IV	Biosynthesis	Amino Acid Biosynthesis	-158.64 (-423.65, 106.37)
ZCEL_adjusted	PWY-6353	-120.383	-322.273	81.5062	102.886	0.242244	1052	100	6855.96	4223.55	9821.01	0.987231	purine nucleotides degradation II (aerobic)	Degradation/Utilization/Assimilation	Nucleoside and Nucleotide Degradation	-120.38 (-322.27, 81.51)
ZCEL_adjusted	TRNA-CHARGING-PWY	-103.935	-278.375	70.5038	88.8967	0.242605	1052	100	23892	15828.4	30582	0.987231	tRNA charging	Biosynthesis	Aminoacyl-tRNA Charging	-103.94 (-278.37, 70.5)
ZCML_adjusted	PWY-7392	152.44	-103.919	408.799	130.644	0.243546	1052	99.0494	3073.39	1420.28	6345.63	0.987231	taxadiene biosynthesis (engineered)	Biosynthesis	Secondary Metabolite Biosynthesis	152.44 (-103.92, 408.8)
ZCEL_adjusted	THRESYN-PWY	-109.912	-294.811	74.9871	94.2272	0.243699	1052	100	25355.1	16743	32117.7	0.987231	superpathway of L-threonine biosynthesis	Biosynthesis	Amino Acid Biosynthesis	-109.91 (-294.81, 74.99)
ZCML_adjusted	REDCITCYC	81.7815	-56.2113	219.774	70.3231	0.245123	1052	98.289	970.885	488.525	2041.12	0.987231	TCA cycle VIII (helicobacter)	Generation of Precursor Metabolites and Energy	TCA cycle	81.78 (-56.21, 219.77)
ZCEL_adjusted	PWY-7208	-121.828	-327.812	84.155	104.972	0.246082	1052	100	27843.1	18509.8	35770.3	0.987231	superpathway of pyrimidine nucleobases salvage	Biosynthesis	Nucleoside and Nucleotide Biosynthesis	-121.83 (-327.81, 84.16)
ZCML_adjusted	HISTSYN-PWY	-108.421	-292.161	75.3185	93.6364	0.247174	1052	100	23019	15352.6	29302.4	0.987231	L-histidine biosynthesis	Biosynthesis	Amino Acid Biosynthesis	-108.42 (-292.16, 75.32)
ZMGH1_adjusted	PWY-841	-205.346	-553.773	143.082	177.564	0.247761	1052	100	8301.76	4998.96	12885.5	0.987231	superpathway of purine nucleotides de novo biosynthesis I	Biosynthesis	Nucleoside and Nucleotide Biosynthesis	-205.35 (-553.77, 143.08)
ZCEL_adjusted	PWY-7184	-121.681	-328.191	84.8303	105.241	0.247863	1052	100	4464.24	2658.68	6904.17	0.987231	pyrimidine deoxyribonucleotides de novo biosynthesis I	Biosynthesis	Nucleoside and Nucleotide Biosynthesis	-121.68 (-328.19, 84.83)
ZMGH1_adjusted	PWY0-166	-142.482	-384.441	99.4777	123.306	0.248148	1052	100	6966.39	4218.29	10479.5	0.987231	superpathway of pyrimidine deoxyribonucleotides de novo biosynthesis (E. coli)	Biosynthesis	Nucleoside and Nucleotide Biosynthesis	-142.48 (-384.44, 99.48)
ZMGH1_adjusted	PWY-6545	-94.9053	-256.724	66.9138	82.4653	0.25006	1052	100	4137.52	2500.09	6313.23	0.987231	pyrimidine deoxyribonucleotides de novo biosynthesis III	Biosynthesis	Nucleoside and Nucleotide Biosynthesis	-94.91 (-256.72, 66.91)
ZCEL_adjusted	PWY-7376	-0.406637	-1.10164	0.288367	0.354184	0.251195	1052	0.665399	0	0	0	0.987231	cob(II)yrinate a,c-diamide biosynthesis II (late cobalt incorporation)	Biosynthesis	Cofactor, Carrier, and Vitamin Biosynthesis	-0.41 (-1.1, 0.29)
ZCML_adjusted	P124-PWY	132.835	-94.3132	359.983	115.758	0.251431	1052	100	3613.03	1988.96	6486.09	0.987231	Bifidobacterium shunt	Degradation/Utilization/Assimilation	Carbohydrate Degradation	132.84 (-94.31, 359.98)
ZCEL_adjusted	PWY-6572	-69.1007	-188.231	50.0298	60.7106	0.255302	1052	95.9125	488.352	152.553	1173.41	0.987231	chondroitin sulfate degradation I (bacterial)	Degradation/Utilization/Assimilation	Carbohydrate Degradation	-69.1 (-188.23, 50.03)
ZMGH1_adjusted	COLANSYN-PWY	-126.535	-344.978	91.9076	111.322	0.255943	1052	100	5801.06	3425.9	8910.29	0.987231	colanic acid building blocks biosynthesis	Biosynthesis	Carbohydrate Biosynthesis	-126.54 (-344.98, 91.91)
ZMGH1_adjusted	PWY-6317	186.625	-136.006	509.257	164.418	0.25661	1052	100	23214.7	15275.4	30872.3	0.987231	galactose degradation I (Leloir pathway)	Degradation/Utilization/Assimilation	Carbohydrate Degradation	186.63 (-136.01, 509.26)
ZMGH1_adjusted	FUCCAT-PWY	138.555	-101.591	378.701	122.382	0.257835	1052	100	5574.65	3632.41	8505.86	0.987231	fucose degradation	Degradation/Utilization/Assimilation	Carbohydrate Degradation	138.55 (-101.59, 378.7)
ZCEL_adjusted	PWY-7323	-161.167	-441.139	118.805	142.677	0.258912	1052	100	4836.55	2791.73	7961.41	0.987231	superpathway of GDP-mannose-derived O-antigen building blocks biosynthesis	Biosynthesis	Carbohydrate Biosynthesis	-161.17 (-441.14, 118.8)
ZCEL_adjusted	PWY-7219	-118.774	-325.242	87.6933	105.219	0.259232	1052	100	27695.5	18298.9	35253.4	0.987231	adenosine ribonucleotides de novo biosynthesis	Biosynthesis	Nucleoside and Nucleotide Biosynthesis	-118.77 (-325.24, 87.69)
ZCEL_adjusted	TEICHOICACID-PWY	76.5144	-56.4928	209.522	67.7823	0.259234	1052	100	3638.78	2325.25	5493.94	0.987231	teichoic acid (poly-glycerol) biosynthesis	Biosynthesis	Cell Structure Biosynthesis	76.51 (-56.49, 209.52)
ZCEL_adjusted	OANTIGEN-PWY	-96.3004	-264.755	72.154	85.8467	0.262221	1052	100	17408.2	11511.1	22715.2	0.987231	O-antigen building blocks biosynthesis (E. coli)	Biosynthesis	Carbohydrate Biosynthesis	-96.3 (-264.75, 72.15)
ZCML_adjusted	PWY-7220	193.447	-145.692	532.586	172.83	0.263278	1052	100	22390.1	14941.6	29966.2	0.987231	adenosine deoxyribonucleotides de novo biosynthesis II	Biosynthesis	Nucleoside and Nucleotide Biosynthesis	193.45 (-145.69, 532.59)
ZCML_adjusted	PWY-7222	193.447	-145.692	532.586	172.83	0.263278	1052	100	22390.1	14941.6	29966.2	0.987231	guanosine deoxyribonucleotides de novo biosynthesis II	Biosynthesis	Nucleoside and Nucleotide Biosynthesis	193.45 (-145.69, 532.59)
ZCEL_adjusted	PANTO-PWY	-97.8939	-269.559	73.7712	87.483	0.263399	1052	100	14872.2	10058.2	19327	0.987231	phosphopantothenate biosynthesis I	Biosynthesis	Cofactor, Carrier, and Vitamin Biosynthesis	-97.89 (-269.56, 73.77)
ZCEL_adjusted	PEPTIDOGLYCANSYN-PWY	-99.5776	-274.598	75.4425	89.1927	0.264498	1052	100	23914.6	15837.2	30622.8	0.987231	peptidoglycan biosynthesis I (meso-diaminopimelate containing)	Biosynthesis	Cell Structure Biosynthesis	-99.58 (-274.6, 75.44)
ZCEL_adjusted	PWY-6387	-99.5329	-274.789	75.7235	89.3131	0.265356	1052	100	24099.4	15965.4	30872.8	0.987231	UDP-N-acetylmuramoyl-pentapeptide biosynthesis I (meso-diaminopimelate containing)	Biosynthesis	Cell Structure Biosynthesis	-99.53 (-274.79, 75.72)
ZMGH1_adjusted	RUMP-PWY	67.0243	-51.8723	185.921	60.5913	0.268911	1052	99.0494	2262.95	1288.97	3683.98	0.987231	formaldehyde oxidation I	Degradation/Utilization/Assimilation	C1 Compound Utilization and Assimilation	67.02 (-51.87, 185.92)
ZCML_adjusted	POLYAMINSYN3-PWY	-51.5379	-143.002	39.9261	46.6113	0.269117	1052	98.4791	1374.25	646.471	2669.23	0.987231	superpathway of polyamine biosynthesis II	Biosynthesis	Amine and Polyamine Biosynthesis	-51.54 (-143, 39.93)
ZMGH1_adjusted	PWY-6891	-78.215	-217.038	60.6083	70.7463	0.269171	1052	100	4602.28	2861.76	6638.28	0.987231	thiazole biosynthesis II (Bacillus)	Biosynthesis	Cofactor, Carrier, and Vitamin Biosynthesis	-78.21 (-217.04, 60.61)
ZCEL_adjusted	PWY-7328	-70.8649	-197.053	55.3236	64.3074	0.270732	1052	99.7148	1039.77	474.147	2211.52	0.987231	superpathway of UDP-glucose-derived O-antigen building blocks biosynthesis	Biosynthesis	Carbohydrate Biosynthesis	-70.86 (-197.05, 55.32)
ZMGH1_adjusted	PWY-5741	-6.68452	-18.651	5.28194	6.09827	0.273277	1052	35.5513	0	0	15.4604	0.987231	ethylmalonyl-CoA pathway	Generation of Precursor Metabolites and Energy	Generation of Precursor Metabolites and Energy	-6.68 (-18.65, 5.28)
ZCML_adjusted	KETOGLUCONMET-PWY	-1.03736	-2.90129	0.826558	0.949881	0.275045	1052	1.42586	0	0	0	0.987231	ketogluconate metabolism	Degradation/Utilization/Assimilation	Carboxylate Degradation	-1.04 (-2.9, 0.83)
ZCEL_adjusted	GALACTUROCAT-PWY	-118.998	-333.093	95.0972	109.106	0.275675	1052	100	9278.61	6166.86	12918.5	0.987231	D-galacturonate degradation I	Degradation/Utilization/Assimilation	Carboxylate Degradation	-119 (-333.09, 95.1)
ZMGH1_adjusted	P122-PWY	73.3509	-58.7406	205.442	67.3157	0.27612	1052	100	2552.34	1408.06	4290.31	0.987231	heterolactic fermentation	Generation of Precursor Metabolites and Energy	Fermentation	73.35 (-58.74, 205.44)
ZMGH1_adjusted	PWY-5028	-3.30986	-9.27476	2.65505	3.0398	0.276479	1052	12.6426	0	0	0	0.987231	L-histidine degradation II	Degradation/Utilization/Assimilation	Amino Acid Degradation	-3.31 (-9.27, 2.66)
ZCEL_adjusted	BRANCHED-CHAIN-AA-SYN-PWY	-125.554	-352.253	101.144	115.529	0.277388	1052	100	27374.2	17990.3	35041.6	0.987231	superpathway of branched amino acid biosynthesis	Biosynthesis	Amino Acid Biosynthesis	-125.55 (-352.25, 101.14)
ZCEL_adjusted	PWY0-1061	218.694	-176.291	613.678	201.29	0.277528	1052	100	12276.7	7738.05	18302.2	0.987231	superpathway of L-alanine biosynthesis	Biosynthesis	Amino Acid Biosynthesis	218.69 (-176.29, 613.68)
ZMGH1_adjusted	NONMEVIPP-PWY	-110.48	-310.402	89.443	101.883	0.278453	1052	100	24411	16038.6	30958.3	0.987231	methylerythritol phosphate pathway I	Biosynthesis	Secondary Metabolite Biosynthesis	-110.48 (-310.4, 89.44)
ZMGH1_adjusted	PWY-7560	-110.48	-310.402	89.443	101.883	0.278453	1052	100	24411	16038.6	30958.3	0.987231	methylerythritol phosphate pathway II	Biosynthesis	Secondary Metabolite Biosynthesis	-110.48 (-310.4, 89.44)
ZCML_adjusted	HCAMHPDEG-PWY	7.60851	-6.17166	21.3887	7.02257	0.278868	1052	18.4411	0	0	0	0.987231	3-phenylpropanoate and 3-(3-hydroxyphenyl)propanoate degradation to 2-oxopent-4-enoate	Degradation/Utilization/Assimilation	Aromatic Compound Degradation	7.61 (-6.17, 21.39)
ZCML_adjusted	PWY-6690	7.60851	-6.17166	21.3887	7.02257	0.278868	1052	18.4411	0	0	0	0.987231	cinnamate and 3-hydroxycinnamate degradation to 2-oxopent-4-enoate	Degradation/Utilization/Assimilation	Aromatic Compound Degradation	7.61 (-6.17, 21.39)
ZCEL_adjusted	P381-PWY	-0.532764	-1.50189	0.436358	0.493878	0.280958	1052	0.570342	0	0	0	0.987231	adenosylcobalamin biosynthesis II (late cobalt incorporation)	Biosynthesis	Cofactor, Carrier, and Vitamin Biosynthesis	-0.53 (-1.5, 0.44)
ZCEL_adjusted	PWY-7391	-0.416801	-1.17536	0.341753	0.38657	0.281195	1052	7.88973	0	0	0	0.987231	isoprene biosynthesis II (engineered)	Biosynthesis	Secondary Metabolite Biosynthesis	-0.42 (-1.18, 0.34)
ZCEL_adjusted	PWY-7211	-106.091	-299.28	87.0988	98.452	0.28147	1052	100	5201.07	3150.23	7738.86	0.987231	superpathway of pyrimidine deoxyribonucleotides de novo biosynthesis	Biosynthesis	Nucleoside and Nucleotide Biosynthesis	-106.09 (-299.28, 87.1)
ZCML_adjusted	PWY-5088	2.67647	-2.22382	7.57676	2.49726	0.284077	1052	6.27376	0	0	0	0.987231	L-glutamate degradation VIII (to propanoate)	Degradation/Utilization/Assimilation	Amino Acid Degradation	2.68 (-2.22, 7.58)
ZMGH1_adjusted	PWY-5484	212.976	-178.63	604.582	199.568	0.286137	1052	100	11109.5	6507.99	17217.5	0.987231	glycolysis II (from fructose 6-phosphate)	Generation of Precursor Metabolites and Energy	Glycolysis	212.98 (-178.63, 604.58)
ZCML_adjusted	GALACTARDEG-PWY	15.6941	-13.1941	44.5824	14.7219	0.286654	1052	66.3498	36.9069	0	151.131	0.987231	D-galactarate degradation I	Degradation/Utilization/Assimilation	Carboxylate Degradation	15.69 (-13.19, 44.58)
ZCML_adjusted	GLUCARGALACTSUPER-PWY	15.6941	-13.1941	44.5824	14.7219	0.286654	1052	66.3498	36.9069	0	151.131	0.987231	superpathway of D-glucarate and D-galactarate degradation	Superpathways	Superpathways	15.69 (-13.19, 44.58)
ZCEL_adjusted	PWY-3001	-109.106	-310.001	91.7881	102.379	0.286803	1052	100	26625.8	17473.5	33734.4	0.987231	superpathway of L-isoleucine biosynthesis I	Biosynthesis	Amino Acid Biosynthesis	-109.11 (-310, 91.79)
ZMGH1_adjusted	PWY0-162	-191.752	-545.726	162.222	180.39	0.288039	1052	100	7617.83	4515.11	12191.9	0.987231	superpathway of pyrimidine ribonucleotides de novo biosynthesis	Biosynthesis	Nucleoside and Nucleotide Biosynthesis	-191.75 (-545.73, 162.22)
ZCML_adjusted	PWY0-1277	12.5073	-10.5993	35.614	11.7755	0.288415	1052	18.4411	0	0	0	0.987231	3-phenylpropanoate and 3-(3-hydroxyphenyl)propanoate degradation	Degradation/Utilization/Assimilation	Aromatic Compound Degradation	12.51 (-10.6, 35.61)
ZCEL_adjusted	PWY-5345	-96.923	-276.413	82.567	91.4706	0.289571	1052	98.384	1539.07	588.255	3273.07	0.987231	superpathway of L-methionine biosynthesis (by sulfhydrylation)	Biosynthesis	Amino Acid Biosynthesis	-96.92 (-276.41, 82.57)
ZMGH1_adjusted	PWY-7196	-182.654	-521.939	156.63	172.904	0.291038	1052	100	6088.55	3487.81	9896.96	0.987231	superpathway of pyrimidine ribonucleosides salvage	Biosynthesis	Nucleoside and Nucleotide Biosynthesis	-182.65 (-521.94, 156.63)
ZMGH1_adjusted	PWY-7197	-121.508	-347.469	104.452	115.153	0.291585	1052	100	3914.29	2203.49	6319.75	0.987231	pyrimidine deoxyribonucleotide phosphorylation	Biosynthesis	Nucleoside and Nucleotide Biosynthesis	-121.51 (-347.47, 104.45)
ZCEL_adjusted	PANTOSYN-PWY	-87.3566	-249.877	75.1639	82.8227	0.291791	1052	100	16579.7	11203.8	21324.1	0.987231	pantothenate and coenzyme A biosynthesis I	Biosynthesis	Cofactor, Carrier, and Vitamin Biosynthesis	-87.36 (-249.88, 75.16)
ZMGH1_adjusted	ANAEROFRUCAT-PWY	192.017	-165.595	549.629	182.244	0.292301	1052	100	13056.7	8062.47	19419.2	0.987231	homolactic fermentation	Generation of Precursor Metabolites and Energy	Fermentation	192.02 (-165.59, 549.63)
ZCEL_adjusted	PWY-6628	-160.502	-460.047	139.042	152.652	0.293309	1052	99.7148	5555.87	3003.23	9948.77	0.987231	superpathway of L-phenylalanine biosynthesis	Biosynthesis	Amino Acid Biosynthesis	-160.5 (-460.05, 139.04)
ZMGH1_adjusted	PWY-6590	-70.6255	-202.447	61.1957	67.1779	0.293358	1052	98.1939	940.282	401.151	2207.38	0.987231	superpathway of Clostridium acetobutylicum acidogenic fermentation	Generation of Precursor Metabolites and Energy	Fermentation	-70.63 (-202.45, 61.2)
ZMGH1_adjusted	PWY-6703	-104.056	-298.768	90.6568	99.2282	0.294585	1052	100	8070.26	5340.85	11082.8	0.987231	preQ0 biosynthesis	Biosynthesis	Secondary Metabolite Biosynthesis	-104.06 (-298.77, 90.66)
ZMGH1_adjusted	LEU-DEG2-PWY	-6.74322	-19.373	5.8866	6.43633	0.295031	1052	42.0152	0	0	24.8138	0.987231	L-leucine degradation I	Degradation/Utilization/Assimilation	Amino Acid Degradation	-6.74 (-19.37, 5.89)
ZCEL_adjusted	PWY-6609	-100.883	-290.026	88.2602	96.39	0.295524	1052	100	23777.4	15777	30371.8	0.987231	adenine and adenosine salvage III	Biosynthesis	Nucleoside and Nucleotide Biosynthesis	-100.88 (-290.03, 88.26)
ZCEL_adjusted	PWY-6630	-159.144	-457.699	139.411	152.148	0.295815	1052	99.7148	5540.32	2995.37	9910.5	0.987231	superpathway of L-tyrosine biosynthesis	Biosynthesis	Amino Acid Biosynthesis	-159.14 (-457.7, 139.41)
ZCEL_adjusted	PRPP-PWY	-133.427	-383.865	117.011	127.627	0.296062	1052	98.8593	3807.56	1839.21	7176.58	0.987231	superpathway of histidine, purine, and pyrimidine biosynthesis	Superpathways	Superpathways	-133.43 (-383.87, 117.01)
ZCEL_adjusted	PWY-6590	-66.8491	-193.001	59.3028	64.2888	0.298665	1052	98.1939	940.282	401.151	2207.38	0.987231	superpathway of Clostridium acetobutylicum acidogenic fermentation	Generation of Precursor Metabolites and Energy	Fermentation	-66.85 (-193, 59.3)
ZCML_adjusted	GLUTORN-PWY	-121.775	-351.757	108.207	117.202	0.299039	1052	100	20214.6	13468.1	25864.5	0.987231	L-ornithine biosynthesis	Biosynthesis	Amino Acid Biosynthesis	-121.78 (-351.76, 108.21)
ZCML_adjusted	PWY-5667	-133.766	-386.897	119.365	128.999	0.300002	1052	100	29104	19283.4	37329.1	0.987231	CDP-diacylglycerol biosynthesis I	Biosynthesis	Fatty Acid and Lipid Biosynthesis	-133.77 (-386.9, 119.37)
ZCML_adjusted	PWY0-1319	-133.766	-386.897	119.365	128.999	0.300002	1052	100	29104	19283.4	37329.1	0.987231	CDP-diacylglycerol biosynthesis II	Biosynthesis	Fatty Acid and Lipid Biosynthesis	-133.77 (-386.9, 119.37)
ZCEL_adjusted	PWY-6126	-110.224	-319.199	98.7511	106.497	0.300912	1052	100	24662.3	16534.3	32099.8	0.987231	superpathway of adenosine nucleotides de novo biosynthesis II	Biosynthesis	Nucleoside and Nucleotide Biosynthesis	-110.22 (-319.2, 98.75)
ZCEL_adjusted	PWY-5415	3.93553	-3.54576	11.4168	3.81257	0.302197	1052	22.5285	0	0	0	0.987231	catechol degradation I (meta-cleavage pathway)	Degradation/Utilization/Assimilation	Aromatic Compound Degradation	3.94 (-3.55, 11.42)
ZCML_adjusted	UDPNAGSYN-PWY	-120.101	-348.898	108.696	116.598	0.303232	1052	100	15051	9882.05	20489	0.987231	UDP-N-acetyl-D-glucosamine biosynthesis I	Biosynthesis	Carbohydrate Biosynthesis	-120.1 (-348.9, 108.7)
ZCEL_adjusted	P125-PWY	-38.7668	-112.94	35.406	37.7995	0.305326	1052	98.6692	425.539	161.909	1012.31	0.987231	superpathway of (R,R)-butanediol biosynthesis	Biosynthesis	Other Biosynthesis	-38.77 (-112.94, 35.41)
ZMGH1_adjusted	GALACTARDEG-PWY	15.5013	-14.3971	45.3997	15.2366	0.309216	1052	66.3498	36.9069	0	151.131	0.987231	D-galactarate degradation I	Degradation/Utilization/Assimilation	Carboxylate Degradation	15.5 (-14.4, 45.4)
ZMGH1_adjusted	GLUCARGALACTSUPER-PWY	15.5013	-14.3971	45.3997	15.2366	0.309216	1052	66.3498	36.9069	0	151.131	0.987231	superpathway of D-glucarate and D-galactarate degradation	Superpathways	Superpathways	15.5 (-14.4, 45.4)
ZCEL_adjusted	PWY-6507	-166.76	-489.127	155.607	164.283	0.310307	1052	100	6422.73	3755.24	10352.7	0.987231	4-deoxy-L-threo-hex-4-enopyranuronate degradation	Degradation/Utilization/Assimilation	Secondary Metabolite Degradation	-166.76 (-489.13, 155.61)
ZCEL_adjusted	PWY-6122	-98.6332	-290.299	93.0328	97.6756	0.312827	1052	100	25010.3	16524.2	31986.1	0.987231	5-aminoimidazole ribonucleotide biosynthesis II	Biosynthesis	Nucleoside and Nucleotide Biosynthesis	-98.63 (-290.3, 93.03)
ZCEL_adjusted	PWY-6277	-98.6332	-290.299	93.0328	97.6756	0.312827	1052	100	25010.3	16524.2	31986.1	0.987231	superpathway of 5-aminoimidazole ribonucleotide biosynthesis	Biosynthesis	Nucleoside and Nucleotide Biosynthesis	-98.63 (-290.3, 93.03)
ZMGH1_adjusted	PWY-7003	64.9882	-61.4792	191.456	64.4495	0.31352	1052	93.1559	543.51	169.241	1317.94	0.987231	glycerol degradation to butanol	Generation of Precursor Metabolites and Energy	Fermentation	64.99 (-61.48, 191.46)
ZCML_adjusted	P122-PWY	65.4411	-62.2047	193.087	65.0501	0.314647	1052	100	2552.34	1408.06	4290.31	0.987231	heterolactic fermentation	Generation of Precursor Metabolites and Energy	Fermentation	65.44 (-62.2, 193.09)
ZMGH1_adjusted	DENOVOPURINE2-PWY	-178.205	-525.944	169.533	177.212	0.314843	1052	100	8688.19	5277.99	13312.6	0.987231	superpathway of purine nucleotides de novo biosynthesis II	Biosynthesis	Nucleoside and Nucleotide Biosynthesis	-178.21 (-525.94, 169.53)
ZMGH1_adjusted	PWY-7323	-149.604	-442.2	142.991	149.111	0.315946	1052	100	4836.55	2791.73	7961.41	0.987231	superpathway of GDP-mannose-derived O-antigen building blocks biosynthesis	Biosynthesis	Carbohydrate Biosynthesis	-149.6 (-442.2, 142.99)
ZCEL_adjusted	PWY-6629	-143.011	-424.139	138.117	143.267	0.31841	1052	72.2433	412.709	0	2436.22	0.987231	superpathway of L-tryptophan biosynthesis	Biosynthesis	Amino Acid Biosynthesis	-143.01 (-424.14, 138.12)
ZCML_adjusted	PWY-7663	-114.069	-338.447	110.309	114.346	0.318721	1052	100	28576.8	19248.7	36214.7	0.987231	gondoate biosynthesis (anaerobic)	Biosynthesis	Fatty Acid and Lipid Biosynthesis	-114.07 (-338.45, 110.31)
ZMGH1_adjusted	PWY-6125	-163.1	-484.069	157.869	163.57	0.318939	1052	100	6168.4	3586.05	9877.57	0.987231	superpathway of guanosine nucleotides de novo biosynthesis II	Biosynthesis	Nucleoside and Nucleotide Biosynthesis	-163.1 (-484.07, 157.87)
ZMGH1_adjusted	PWY-7237	93.6842	-90.7946	278.163	94.013	0.31924	1052	100	2546.6	1476.53	4326.88	0.987231	myo-, chiro- and scillo-inositol degradation	Degradation/Utilization/Assimilation	Secondary Metabolite Degradation	93.68 (-90.79, 278.16)
ZCML_adjusted	PWY-7400	-113.639	-337.453	110.175	114.059	0.319328	1052	100	21822.4	14480	27823.1	0.987231	L-arginine biosynthesis IV (archaebacteria)	Biosynthesis	Amino Acid Biosynthesis	-113.64 (-337.45, 110.17)
ZCEL_adjusted	PWY-2942	-109.852	-326.299	106.595	110.304	0.319535	1052	100	27352.6	18057.9	35022.3	0.987231	L-lysine biosynthesis III	Biosynthesis	Amino Acid Biosynthesis	-109.85 (-326.3, 106.6)
ZCML_adjusted	ARGSYN-PWY	-113.986	-339.847	111.876	115.102	0.322259	1052	100	21857.2	14526.4	27919	0.987231	L-arginine biosynthesis I (via L-ornithine)	Biosynthesis	Amino Acid Biosynthesis	-113.99 (-339.85, 111.88)
ZCML_adjusted	GOLPDLCAT-PWY	7.78733	-7.73701	23.3117	7.91142	0.325192	1052	84.8859	73.9863	18.5319	184.289	0.987231	superpathway of glycerol degradation to 1,3-propanediol	Degradation/Utilization/Assimilation	Alcohol Degradation	7.79 (-7.74, 23.31)
ZMGH1_adjusted	CENTFERM-PWY	-54.6627	-163.695	54.3694	55.5643	0.325457	1052	98.1939	736.082	313.137	1758.06	0.987231	pyruvate fermentation to butanoate	Generation of Precursor Metabolites and Energy	Fermentation	-54.66 (-163.69, 54.37)
ZMGH1_adjusted	PWY-6396	14.4213	-14.3465	43.189	14.6604	0.325501	1052	90.1141	120.376	29.3678	355.933	0.987231	superpathway of 2,3-butanediol biosynthesis	Biosynthesis	Other Biosynthesis	14.42 (-14.35, 43.19)
ZCEL_adjusted	TCA	-145.521	-436.755	145.713	148.417	0.327076	1052	99.5247	4450.87	2346.38	8199.69	0.987231	TCA cycle I (prokaryotic)	Generation of Precursor Metabolites and Energy	TCA cycle	-145.52 (-436.75, 145.71)
ZCEL_adjusted	PWY-6700	-111.771	-335.796	112.253	114.166	0.327797	1052	100	8678.76	5723.31	12067	0.987231	queuosine biosynthesis	Macromolecule Modification	Nucleic Acid Processing	-111.77 (-335.8, 112.25)
ZCEL_adjusted	PWY-6165	-1.43813	-4.32582	1.44956	1.47161	0.328674	1052	15.3992	0	0	0	0.987231	chorismate biosynthesis II (archaea)	Biosynthesis	Aromatic Compound Biosynthesis	-1.44 (-4.33, 1.45)
ZCML_adjusted	THRESYN-PWY	-92.9751	-279.704	93.7537	95.1596	0.328777	1052	100	25355.1	16743	32117.7	0.987231	superpathway of L-threonine biosynthesis	Biosynthesis	Amino Acid Biosynthesis	-92.98 (-279.7, 93.75)
ZMGH1_adjusted	PWY-7200	-110.202	-331.737	111.334	112.898	0.329235	1052	100	5088.22	3020	7879.54	0.987231	superpathway of pyrimidine deoxyribonucleoside salvage	Biosynthesis	Nucleoside and Nucleotide Biosynthesis	-110.2 (-331.74, 111.33)
ZCML_adjusted	COBALSYN-PWY	-101.392	-305.89	103.106	104.215	0.330825	1052	100	20356.9	13719.9	26582.1	0.987231	adenosylcobalamin salvage from cobinamide I	Biosynthesis	Cofactor, Carrier, and Vitamin Biosynthesis	-101.39 (-305.89, 103.11)
ZCML_adjusted	ASPASN-PWY	-81.498	-246.39	83.3945	84.0315	0.332349	1052	100	19142.2	12745.3	24674.5	0.987231	superpathway of L-aspartate and L-asparagine biosynthesis	Biosynthesis	Amino Acid Biosynthesis	-81.5 (-246.39, 83.39)
ZMGH1_adjusted	PWY-7228	-149.675	-452.976	153.626	154.566	0.333094	1052	100	5482.16	3147.07	8855.02	0.987231	superpathway of guanosine nucleotides de novo biosynthesis I	Biosynthesis	Nucleoside and Nucleotide Biosynthesis	-149.68 (-452.98, 153.63)
ZCML_adjusted	PWY-6163	-116.882	-354.488	120.724	121.087	0.334636	1052	100	26236.9	17413.1	33616	0.987231	chorismate biosynthesis from 3-dehydroquinate	Biosynthesis	Aromatic Compound Biosynthesis	-116.88 (-354.49, 120.72)
ZMGH1_adjusted	DTDPRHAMSYN-PWY	113.822	-118.907	346.551	118.602	0.337433	1052	100	22729.9	15135.2	29575.6	0.987231	dTDP-L-rhamnose biosynthesis I	Biosynthesis	Carbohydrate Biosynthesis	113.82 (-118.91, 346.55)
ZCEL_adjusted	CENTFERM-PWY	-50.9165	-155.261	53.4278	53.1753	0.338529	1052	98.1939	736.082	313.137	1758.06	0.987231	pyruvate fermentation to butanoate	Generation of Precursor Metabolites and Energy	Fermentation	-50.92 (-155.26, 53.43)
ZCML_adjusted	PWY0-862	200.977	-211.245	613.199	210.074	0.338946	1052	100	4162.56	1895.12	8064.87	0.987231	(5Z)-dodec-5-enoate biosynthesis	Biosynthesis	Fatty Acid and Lipid Biosynthesis	200.98 (-211.25, 613.2)
ZMGH1_adjusted	PWY-6165	-1.46777	-4.48533	1.5498	1.53779	0.340073	1052	15.3992	0	0	0	0.987231	chorismate biosynthesis II (archaea)	Biosynthesis	Aromatic Compound Biosynthesis	-1.47 (-4.49, 1.55)
ZMGH1_adjusted	PWY-5022	-27.493	-84.0592	29.0732	28.8269	0.340446	1052	99.5247	551.078	222.951	1124.97	0.987231	4-aminobutanoate degradation V	Degradation/Utilization/Assimilation	Amine and Polyamine Degradation	-27.49 (-84.06, 29.07)
ZCML_adjusted	PWY-6892	-128.096	-392.41	136.217	134.698	0.341832	1052	100	18317.8	12258.7	24269.7	0.987231	thiazole biosynthesis I (E. coli)	Biosynthesis	Cofactor, Carrier, and Vitamin Biosynthesis	-128.1 (-392.41, 136.22)
ZCML_adjusted	PWY-5005	-25.6401	-78.9001	27.6199	27.142	0.345052	1052	90.6844	252.039	77.575	660.078	0.987231	biotin biosynthesis II	Biosynthesis	Cofactor, Carrier, and Vitamin Biosynthesis	-25.64 (-78.9, 27.62)
ZMGH1_adjusted	PWY-6700	-112.501	-346.603	121.601	119.302	0.345905	1052	100	8678.76	5723.31	12067	0.987231	queuosine biosynthesis	Macromolecule Modification	Nucleic Acid Processing	-112.5 (-346.6, 121.6)
ZCML_adjusted	AST-PWY	31.9733	-34.5797	98.5263	33.9163	0.346049	1052	70.1521	29.67	0	230.377	0.987231	L-arginine degradation II (AST pathway)	Degradation/Utilization/Assimilation	Amino Acid Degradation	31.97 (-34.58, 98.53)
ZMGH1_adjusted	PWY-6478	-36.7306	-113.246	39.7849	38.9934	0.346429	1052	100	1683.19	993.003	2634.24	0.987231	GDP-D-glycero-&alpha;-D-manno-heptose biosynthesis	Biosynthesis	Carbohydrate Biosynthesis	-36.73 (-113.25, 39.78)
ZMGH1_adjusted	GOLPDLCAT-PWY	7.69321	-8.37386	23.7603	8.188	0.347658	1052	84.8859	73.9863	18.5319	184.289	0.987231	superpathway of glycerol degradation to 1,3-propanediol	Degradation/Utilization/Assimilation	Alcohol Degradation	7.69 (-8.37, 23.76)
ZCML_adjusted	PWY-3781	-28.6491	-88.524	31.2259	30.5131	0.347997	1052	57.8897	23.9901	0	202.913	0.987231	aerobic respiration I (cytochrome c)	Generation of Precursor Metabolites and Energy	Electron Transfer Chains	-28.65 (-88.52, 31.23)
ZCEL_adjusted	PWY-6396	13.1726	-14.3587	40.704	14.0304	0.348019	1052	90.1141	120.376	29.3678	355.933	0.987231	superpathway of 2,3-butanediol biosynthesis	Biosynthesis	Other Biosynthesis	13.17 (-14.36, 40.7)
ZCML_adjusted	PEPTIDOGLYCANSYN-PWY	-84.5142	-261.263	92.2344	90.0736	0.348321	1052	100	23914.6	15837.2	30622.8	0.987231	peptidoglycan biosynthesis I (meso-diaminopimelate containing)	Biosynthesis	Cell Structure Biosynthesis	-84.51 (-261.26, 92.23)
ZCEL_adjusted	PWY-7003	57.7205	-63.3147	178.756	61.6812	0.349602	1052	93.1559	543.51	169.241	1317.94	0.987231	glycerol degradation to butanol	Generation of Precursor Metabolites and Energy	Fermentation	57.72 (-63.31, 178.76)
ZCML_adjusted	ANAEROFRUCAT-PWY	164.805	-180.78	510.391	176.115	0.349605	1052	100	13056.7	8062.47	19419.2	0.987231	homolactic fermentation	Generation of Precursor Metabolites and Energy	Fermentation	164.81 (-180.78, 510.39)
ZCML_adjusted	PWY-5686	-106.941	-331.731	117.85	114.556	0.350769	1052	100	27332.3	18044.3	34875.9	0.987231	UMP biosynthesis	Biosynthesis	Nucleoside and Nucleotide Biosynthesis	-106.94 (-331.73, 117.85)
ZCML_adjusted	PWY-5484	179.946	-198.497	558.389	192.86	0.351018	1052	100	11109.5	6507.99	17217.5	0.987231	glycolysis II (from fructose 6-phosphate)	Generation of Precursor Metabolites and Energy	Glycolysis	179.95 (-198.5, 558.39)
ZCEL_adjusted	PWY0-1241	-39.1733	-121.566	43.2191	41.9883	0.351061	1052	99.2395	545.675	219.169	1260.95	0.987231	ADP-L-glycero-&beta;-D-manno-heptose biosynthesis	Biosynthesis	Carbohydrate Biosynthesis	-39.17 (-121.57, 43.22)
ZCEL_adjusted	PWY-5103	-107.251	-333.129	118.628	115.111	0.351703	1052	100	27164.7	17871.6	34810.5	0.987231	L-isoleucine biosynthesis III	Biosynthesis	Amino Acid Biosynthesis	-107.25 (-333.13, 118.63)
ZMGH1_adjusted	PWY-6572	-58.906	-183.418	65.6059	63.453	0.353448	1052	95.9125	488.352	152.553	1173.41	0.987231	chondroitin sulfate degradation I (bacterial)	Degradation/Utilization/Assimilation	Carbohydrate Degradation	-58.91 (-183.42, 65.61)
ZMGH1_adjusted	P461-PWY	153.351	-171.193	477.894	165.392	0.354043	1052	99.7148	3666.34	1959.73	6609.45	0.987231	hexitol fermentation to lactate, formate, ethanol and acetate	Degradation/Utilization/Assimilation	Carboxylate Degradation	153.35 (-171.19, 477.89)
ZCEL_adjusted	PWY-4984	-64.0572	-199.725	71.6102	69.138	0.354397	1052	99.8099	1397.04	664.511	2841.35	0.987231	urea cycle	Degradation/Utilization/Assimilation	Inorganic Nutrient Metabolism	-64.06 (-199.72, 71.61)
ZCML_adjusted	PWY-5509	-95.03	-297.524	107.464	103.194	0.357324	1052	100	19736.2	13255.1	25739.1	0.987231	adenosylcobalamin biosynthesis from cobyrinate a,c-diamide I	Biosynthesis	Cofactor, Carrier, and Vitamin Biosynthesis	-95.03 (-297.52, 107.46)
ZCEL_adjusted	PWY-7094	-3.009	-9.44123	3.42323	3.27795	0.358859	1052	14.1635	0	0	0	0.987231	fatty acid salvage	Biosynthesis	Fatty Acid and Lipid Biosynthesis	-3.01 (-9.44, 3.42)
ZCEL_adjusted	RHAMCAT-PWY	-101.137	-317.36	115.086	110.19	0.358916	1052	100	5773.88	3640.75	8336.89	0.987231	L-rhamnose degradation I	Degradation/Utilization/Assimilation	Carbohydrate Degradation	-101.14 (-317.36, 115.09)
ZCML_adjusted	PANTO-PWY	-81.0404	-254.405	92.3239	88.3489	0.359212	1052	100	14872.2	10058.2	19327	0.987231	phosphopantothenate biosynthesis I	Biosynthesis	Cofactor, Carrier, and Vitamin Biosynthesis	-81.04 (-254.4, 92.32)
ZCML_adjusted	ANAGLYCOLYSIS-PWY	-110.41	-346.61	125.789	120.371	0.359224	1052	100	28324.6	19002.3	36536.2	0.987231	glycolysis III (from glucose)	Generation of Precursor Metabolites and Energy	Glycolysis	-110.41 (-346.61, 125.79)
ZCML_adjusted	PWY-6269	-93.9425	-295.807	107.922	102.873	0.361357	1052	100	19818.2	13330.1	25876	0.987231	adenosylcobalamin salvage from cobinamide II	Biosynthesis	Cofactor, Carrier, and Vitamin Biosynthesis	-93.94 (-295.81, 107.92)
ZCEL_adjusted	PWY-5677	-12.6063	-39.7003	14.4878	13.8075	0.361456	1052	97.4335	287.812	141.318	551.208	0.987231	succinate fermentation to butanoate	Generation of Precursor Metabolites and Energy	Fermentation	-12.61 (-39.7, 14.49)
ZCEL_adjusted	PWY0-845	-90.1263	-284.346	104.093	98.9769	0.36273	1052	99.5247	1728.47	691.859	3716.56	0.987231	superpathway of pyridoxal 5'-phosphate biosynthesis and salvage	Biosynthesis	Cofactor, Carrier, and Vitamin Biosynthesis	-90.13 (-284.35, 104.09)
ZCEL_adjusted	PWY-6471	-125.014	-394.712	144.684	137.442	0.363258	1052	100	8961.88	5694.33	13592	0.987231	peptidoglycan biosynthesis IV (Enterococcus faecium)	Biosynthesis	Cell Structure Biosynthesis	-125.01 (-394.71, 144.68)
ZMGH1_adjusted	PWY-6629	-136.012	-429.802	157.777	149.719	0.363854	1052	72.2433	412.709	0	2436.22	0.987231	superpathway of L-tryptophan biosynthesis	Biosynthesis	Amino Acid Biosynthesis	-136.01 (-429.8, 157.78)
ZCML_adjusted	COLANSYN-PWY	-97.606	-308.727	113.515	107.59	0.364512	1052	100	5801.06	3425.9	8910.29	0.987231	colanic acid building blocks biosynthesis	Biosynthesis	Carbohydrate Biosynthesis	-97.61 (-308.73, 113.51)
ZCML_adjusted	PWY-5104	-123.737	-391.394	143.919	136.402	0.364537	1052	100	29734.1	19705.2	38042.5	0.987231	L-isoleucine biosynthesis IV	Biosynthesis	Amino Acid Biosynthesis	-123.74 (-391.39, 143.92)
ZCML_adjusted	PWY-6121	-82.5025	-261.042	96.0367	90.9861	0.364746	1052	100	24900.6	16591	31719.4	0.987231	5-aminoimidazole ribonucleotide biosynthesis I	Biosynthesis	Nucleoside and Nucleotide Biosynthesis	-82.5 (-261.04, 96.04)
ZCML_adjusted	ARGSYNBSUB-PWY	-116.875	-369.903	136.154	128.947	0.364949	1052	100	22158.6	14866.2	28336.7	0.987231	L-arginine biosynthesis II (acetyl cycle)	Biosynthesis	Amino Acid Biosynthesis	-116.87 (-369.9, 136.15)
ZCEL_adjusted	PWY-7644	0.0361143	-0.0420786	0.114307	0.0398482	0.364991	1052	0.760456	0	0	0	0.987231	heparin degradation	Degradation/Utilization/Assimilation	Carbohydrate Degradation	0.04 (-0.04, 0.11)
ZCEL_adjusted	ILEUSYN-PWY	-115.535	-366.455	135.385	127.872	0.366462	1052	100	28873.7	19013.5	37109.9	0.987231	L-isoleucine biosynthesis I (from threonine)	Biosynthesis	Amino Acid Biosynthesis	-115.53 (-366.45, 135.39)
ZCEL_adjusted	VALSYN-PWY	-115.535	-366.455	135.385	127.872	0.366462	1052	100	28873.7	19013.5	37109.9	0.987231	L-valine biosynthesis	Biosynthesis	Amino Acid Biosynthesis	-115.53 (-366.45, 135.39)
[truncated: 728 more rows]

## Sheet: suppl table 9
Factor	Taxon	Beta	CI95_L	CI95_U	Se	p	N	presence	median.count	IQR.L count	IQR.U count	Kingdom	Phylum	Class	Order	Family	Genus	95% CI
[truncated: 188 more rows]

## Sheet: suppl table 10
Factor	Taxon	Beta	CI95_L	CI95_U	Se	p	N	presence	median.count	IQR.L	IQR.U	Kingdom	Phylum	Class	Order	Family	Genus	95% CI
[truncated: 188 more rows]

[truncated: 1 more sheets: suppl table 12]
